# Supplementary material for: The Relationship between Serum Adipokines, miR-222-3p, miR-103a-3p and Glucose Regulation in Pregnancy and Two to Three Years Post-Delivery in Women with Gestational Diabetes Mellitus Adhering to Mediterranean Diet Recommendations
Source: MDPI journal article supplement (doi:10.3390/nu14224712), 2022-11-08
Supplement: s1 [file s1]

| GDM | NAGT_AGT_2a | GROUPS  |
|-----|-------------|---------|
| NGT | NGT         | CONTROL |
| NGT | NGT         | CONTROL |
| NGT | NGT         | CONTROL |
| DMG | AGT         | CONTROL |
| NGT | AGT         | CONTROL |
| NGT | NGT         | CONTROL |
| NGT | NGT         | CONTROL |
| NGT | NGT         | CONTROL |
| DMG | NGT         | CONTROL |
| NGT | AGT         | CONTROL |
| DMG | NGT         | CONTROL |
| NGT | AGT         | CONTROL |
| NGT | NGT         | CONTROL |
| DMG | NGT         | CONTROL |
| NGT | NGT         | CONTROL |
| DMG | AGT         | CONTROL |
| NGT | NGT         | CONTROL |
| NGT | NGT         | CONTROL |
| NGT | AGT         | CONTROL |
| DMG | NGT         | CONTROL |
| DMG | NGT         | CONTROL |
| NGT | NGT         | CONTROL |
| DMG | NGT         | CONTROL |
| NGT | AGT         | CONTROL |
| DMG | AGT         | CONTROL |
| NGT | NGT         | CONTROL |
| NGT | AGT         | CONTROL |
| DMG | AGT         | CONTROL |
| DMG | NGT         | CONTROL |
| NGT | NGT         | CONTROL |
| DMG | NGT         | CONTROL |
| NGT | NGT         | CONTROL |
| NGT | NGT         | CONTROL |
| DMG | NGT         | CONTROL |
| DMG | AGT         | CONTROL |
| NGT | NGT         | CONTROL |

|     |     |         |
|-----|-----|---------|
| NGT | NGT | CONTROL |
| DMG | NGT | CONTROL |
| NGT | AGT | CONTROL |
| NGT | NGT | CONTROL |
| NGT | AGT | CONTROL |
| DMG | NGT | CONTROL |
| DMG | AGT | CONTROL |
| NGT | NGT | CONTROL |
| DMG | AGT | CONTROL |
| NGT | NGT | CONTROL |
| NGT | NGT | CONTROL |
| NGT | NGT | CONTROL |
| DMG | AGT | CONTROL |
| NGT | NGT | CONTROL |
| DMG | AGT | CONTROL |
| NGT | NGT | CONTROL |
| DMG | AGT | CONTROL |
| NGT | NGT | CONTROL |
| NGT | AGT | CONTROL |
| NGT | NGT | CONTROL |
| NGT | NGT | CONTROL |
| NGT | NGT | CONTROL |
| DMG | NGT | CONTROL |
| NGT | NGT | CONTROL |
| NGT | NGT | CONTROL |

|     |     |              |
|-----|-----|--------------|
| NGT | NGT | CONTROL      |
| NGT | AGT | CONTROL      |
| NGT | NGT | CONTROL      |
| NGT | NGT | CONTROL      |
| NGT | AGT | CONTROL      |
| NGT | NGT | INTERVENCION |
| NGT | NGT | CONTROL      |
| DMG | NGT | CONTROL      |
| NGT | NGT | CONTROL      |
| DMG | NGT | CONTROL      |
| NGT | NGT | INTERVENCION |
| DMG | NGT | CONTROL      |
| NGT | NGT | CONTROL      |
| NGT | NGT | INTERVENCION |
| NGT | NGT | CONTROL      |
| NGT | NGT | CONTROL      |
| NGT | NGT | INTERVENCION |
| DMG | NGT | INTERVENCION |
| NGT | NGT | CONTROL      |
| NGT | NGT | CONTROL      |
| NGT | NGT | INTERVENCION |
| DMG | NGT | INTERVENCION |
| NGT | NGT | INTERVENCION |
| NGT | NGT | INTERVENCION |
| DMG | AGT | CONTROL      |
| NGT | NGT | INTERVENCION |
| NGT | NGT | INTERVENCION |
| DMG | AGT | CONTROL      |
| NGT | NGT | INTERVENCION |
| DMG | AGT | CONTROL      |
| DMG | AGT | CONTROL      |
| NGT | NGT | CONTROL      |
| NGT | NGT | INTERVENCION |
| NGT | NGT | INTERVENCION |
| DMG | AGT | INTERVENCION |
| DMG | NGT | CONTROL      |
| NGT | NGT | INTERVENCION |
| DMG | NGT | INTERVENCION |
| DMG | NGT | INTERVENCION |
| NGT | NGT | INTERVENCION |
| NGT | NGT | CONTROL      |
| NGT | NGT | INTERVENCION |
| DMG | NGT | INTERVENCION |
| DMG | NGT | INTERVENCION |
| NGT | NGT | INTERVENCION |
| NGT | NGT | CONTROL      |
| NGT | NGT | INTERVENCION |
| DMG | NGT | CONTROL      |

|     |     |              |
|-----|-----|--------------|
| DMG | NGT | INTERVENCION |
| DMG | NGT | INTERVENCION |
| NGT | NGT | INTERVENCION |
| NGT | NGT | INTERVENCION |
| DMG | NGT | INTERVENCION |
| DMG | NGT | CONTROL      |
| NGT | NGT | INTERVENCION |
| NGT | NGT | INTERVENCION |
| NGT | NGT | INTERVENCION |
| NGT | AGT | INTERVENCION |
| NGT | NGT | INTERVENCION |
| NGT | NGT | INTERVENCION |
| NGT | NGT | INTERVENCION |
| NGT | AGT | INTERVENCION |
| NGT | NGT | INTERVENCION |
| DMG | NGT | INTERVENCION |
| NGT | NGT | INTERVENCION |
| NGT | NGT | INTERVENCION |
| DMG | NGT | INTERVENCION |
| NGT | NGT | INTERVENCION |
| DMG | AGT | INTERVENCION |
| NGT | NGT | INTERVENCION |
| NGT | AGT | INTERVENCION |
| DMG | NGT | INTERVENCION |
| DMG | NGT | INTERVENCION |
| NGT | NGT | INTERVENCION |
| NGT | NGT | INTERVENCION |
| NGT | NGT | INTERVENCION |
| DMG | NGT | INTERVENCION |
| NGT | NGT | INTERVENCION |
| DMG | NGT | INTERVENCION |
| NGT | NGT | INTERVENCION |
| DMG | NGT | INTERVENCION |
| NGT | NGT | CONTROL      |
| NGT | NGT | INTERVENCION |

|     |     |              |
|-----|-----|--------------|
| DMG | NGT | CONTROL      |
| NGT | NGT | INTERVENCION |
| NGT | AGT | INTERVENCION |
| NGT | NGT | INTERVENCION |
| NGT | NGT | INTERVENCION |
| NGT | AGT | INTERVENCION |
| NGT | NGT | INTERVENCION |
| DMG | AGT | CONTROL      |
| NGT | NGT | INTERVENCION |
| NGT | AGT | INTERVENCION |
| NGT | NGT | INTERVENCION |
| DMG | NGT | INTERVENCION |
| NGT | NGT | INTERVENCION |
| NGT | NGT | INTERVENCION |
| NGT | NGT | INTERVENCION |
| DMG | NGT | CONTROL      |
| NGT | NGT | INTERVENCION |
| DMG | NGT | INTERVENCION |
| NGT | NGT | INTERVENCION |
| NGT | NGT | INTERVENCION |
| NGT | NGT | INTERVENCION |
| DMG | NGT | CONTROL      |
| DMG | AGT | INTERVENCION |
| DMG | NGT | INTERVENCION |
| NGT | AGT | INTERVENCION |
| NGT | NGT | INTERVENCION |
| NGT | AGT | INTERVENCION |
| DMG | AGT | INTERVENCION |
| NGT | NGT | INTERVENCION |
| DMG | NGT | INTERVENCION |
| NGT | NGT | INTERVENCION |
| NGT | AGT | INTERVENCION |
| NGT | NGT | INTERVENCION |
| NGT | NGT | INTERVENCION |
| NGT | NGT | INTERVENCION |
| DMG | NGT | INTERVENCION |

|     |     |              |
|-----|-----|--------------|
| NGT | NGT | INTERVENCION |
| NGT | NGT | INTERVENCION |
| DMG | AGT | INTERVENCION |
| DMG | AGT | INTERVENCION |
| DMG | NGT | INTERVENCION |
| NGT | NGT | CONTROL      |
| DMG | NGT | INTERVENCION |
| NGT | NGT | INTERVENCION |
| NGT | NGT | INTERVENCION |
| DMG | AGT | CONTROL      |
| NGT | NGT | INTERVENCION |
| DMG | NGT | INTERVENCION |
| DMG | AGT | INTERVENCION |
| NGT | NGT | INTERVENCION |
| NGT | AGT | INTERVENCION |
| NGT | NGT | INTERVENCION |
| NGT | NGT | INTERVENCION |
| NGT | NGT | INTERVENCION |
| DMG | NGT | INTERVENCION |
| NGT | NGT | INTERVENCION |
| DMG | NGT | INTERVENCION |
| NGT | NGT | INTERVENCION |
| DMG | AGT | INTERVENCION |
| DMG | AGT | INTERVENCION |
| NGT | NGT | INTERVENCION |
| NGT | NGT | INTERVENCION |
| NGT | NGT | CONTROL      |
| NGT | NGT | INTERVENCION |
| NGT | NGT | CONTROL      |
| NGT | NGT | INTERVENCION |
| NGT | NGT | CONTROL      |
| NGT | NGT | INTERVENCION |
| NGT | NGT | INTERVENCION |
| NGT | NGT | INTERVENCION |
| NGT | AGT | INTERVENCION |
| NGT | NGT | INTERVENCION |
| NGT | NGT | INTERVENCION |
| DMG | AGT | CONTROL      |

|     |     |              |
|-----|-----|--------------|
| NGT | NGT | INTERVENCION |
| DMG | NGT | INTERVENCION |
| DMG | NGT | INTERVENCION |
| NGT | NGT | INTERVENCION |
| DMG | NGT | INTERVENCION |
| NGT | AGT | INTERVENCION |
| DMG | AGT | CONTROL      |
| DMG | AGT | CONTROL      |
| NGT | NGT | INTERVENCION |
| NGT | AGT | INTERVENCION |
| DMG | NGT | INTERVENCION |
| NGT | AGT | INTERVENCION |

| GROUPS INTERVENTION/GDM                  | Body Weight<br>(Kg) 24 gw | Body Weight (Kg) 2<br>years PD |
|------------------------------------------|---------------------------|--------------------------------|
| 1. Control (No intervencion No Diabetes) | 62,0                      | 52,6                           |
| 1. Control (No intervencion No Diabetes) | 62,5                      | 61,1                           |
| 1. Control (No intervencion No Diabetes) | NAN                       | 66,0                           |
| 2. Controles que SI desarrollan DMG      | 84,0                      | 89,2                           |
| 1. Control (No intervencion No Diabetes) | 59,6                      | 61,5                           |
| 1. Control (No intervencion No Diabetes) | 51,9                      | 47,8                           |
| 1. Control (No intervencion No Diabetes) | 52,7                      | NAN                            |
| 1. Control (No intervencion No Diabetes) | 81,0                      | 83,8                           |
| 2. Controles que SI desarrollan DMG      | 67,7                      | 64,7                           |
| 1. Control (No intervencion No Diabetes) | 86,0                      | 91,6                           |
| 2. Controles que SI desarrollan DMG      | 49,4                      | 40,0                           |
| 1. Control (No intervencion No Diabetes) | 91,0                      | 87,4                           |
| 1. Control (No intervencion No Diabetes) | 56,0                      | 52,4                           |
| 1. Control (No intervencion No Diabetes) | 105,0                     | 109,2                          |
| 1. Control (No intervencion No Diabetes) | 63,0                      | 54,6                           |
| 1. Control (No intervencion No Diabetes) | 56,5                      | 51,0                           |
| 1. Control (No intervencion No Diabetes) | 60,0                      | 53,5                           |
| 2. Controles que SI desarrollan DMG      | 62,0                      | 56,5                           |
| 1. Control (No intervencion No Diabetes) | 67,7                      | 68,7                           |
| 2. Controles que SI desarrollan DMG      | 76,0                      | 69,7                           |
| 1. Control (No intervencion No Diabetes) | 57,3                      | 54,3                           |
| 1. Control (No intervencion No Diabetes) | 74,0                      | 73,5                           |
| 1. Control (No intervencion No Diabetes) | NAN                       | 81,4                           |
| 2. Controles que SI desarrollan DMG      | 65,8                      | 58,4                           |
| 2. Controles que SI desarrollan DMG      | 86,9                      | 82,0                           |
| 1. Control (No intervencion No Diabetes) | 63,0                      | NAN                            |
| 2. Controles que SI desarrollan DMG      | 70,3                      | 67,8                           |
| 1. Control (No intervencion No Diabetes) | 83,7                      | 87,3                           |
| 2. Controles que SI desarrollan DMG      | 57,0                      | 48,2                           |
| 1. Control (No intervencion No Diabetes) | 73,3                      | 62,6                           |
| 1. Control (No intervencion No Diabetes) | 71,8                      | 69,7                           |
| 2. Controles que SI desarrollan DMG      | 62,0                      | 58,1                           |
| 2. Controles que SI desarrollan DMG      | 67,1                      | 66,2                           |
| 1. Control (No intervencion No Diabetes) | 84,0                      | 80,0                           |
| 1. Control (No intervencion No Diabetes) | 62,3                      | 60,6                           |
| 1. Control (No intervencion No Diabetes) | 66,5                      | 59,3                           |
| 1. Control (No intervencion No Diabetes) | 57,0                      | 51,5                           |
| 2. Controles que SI desarrollan DMG      | 88,6                      | 92,7                           |
| 1. Control (No intervencion No Diabetes) | 71,9                      | NAN                            |
| 1. Control (No intervencion No Diabetes) | 68,2                      | 68,2                           |
| 2. Controles que SI desarrollan DMG      | 76,5                      | 64,6                           |
| 2. Controles que SI desarrollan DMG      | 67,5                      | 64,8                           |
| 1. Control (No intervencion No Diabetes) | 70,8                      | 66,9                           |
| 1. Control (No intervencion No Diabetes) | 53,8                      | 55,6                           |
| 1. Control (No intervencion No Diabetes) | 71,6                      | 64,8                           |
| 1. Control (No intervencion No Diabetes) | 69,2                      | 66,5                           |
| 1. Control (No intervencion No Diabetes) | 51,0                      | 46,4                           |



|                                          |       |       |
|------------------------------------------|-------|-------|
| 1. Control (No intervencion No Diabetes) | 62,5  | 57,6  |
| 1. Control (No intervencion No Diabetes) | 72,1  | 66,8  |
| 1. Control (No intervencion No Diabetes) | 65,0  | 60,3  |
| 1. Control (No intervencion No Diabetes) | 78,3  | 78,3  |
| 1. Control (No intervencion No Diabetes) | 53,0  | 48,0  |
| 2. Controles que SI desarrollan DMG      | 71,1  | 61,5  |
| 1. Control (No intervencion No Diabetes) | 66,7  | 63,0  |
| 1. Control (No intervencion No Diabetes) | 59,9  | NAN   |
| 1. Control (No intervencion No Diabetes) | 74,9  | 65,0  |
| 1. Control (No intervencion No Diabetes) | 66,1  | 62,9  |
| 1. Control (No intervencion No Diabetes) | 79,0  | 65,0  |
| 1. Control (No intervencion No Diabetes) | 57,5  | 56,3  |
| 1. Control (No intervencion No Diabetes) | 76,6  | 71,0  |
| 1. Control (No intervencion No Diabetes) | 67,7  | 52,7  |
| 1. Control (No intervencion No Diabetes) | 72,0  | 70,6  |
| 1. Control (No intervencion No Diabetes) | 70,0  | 63,2  |
| 1. Control (No intervencion No Diabetes) | 72,0  | 70,0  |
| 1. Control (No intervencion No Diabetes) | 63,8  | 57,1  |
| 1. Control (No intervencion No Diabetes) | 69,1  | 67,6  |
| 1. Control (No intervencion No Diabetes) | 53,0  | 51,4  |
| 1. Control (No intervencion No Diabetes) | 57,2  | 57,0  |
| 1. Control (No intervencion No Diabetes) | 62,7  | 58,5  |
| 1. Control (No intervencion No Diabetes) | 68,3  | 70,5  |
| 1. Control (No intervencion No Diabetes) | 59,6  | 54,4  |
| 1. Control (No intervencion No Diabetes) | 136,3 | 157,9 |
| 1. Control (No intervencion No Diabetes) | 81,5  | 83,7  |
| 2. Controles que SI desarrollan DMG      | 63,0  | 47,9  |
| 2. Controles que SI desarrollan DMG      | 88,7  | NAN   |
| 1. Control (No intervencion No Diabetes) | 67,1  | 65,7  |
| 1. Control (No intervencion No Diabetes) | 69,1  | 69,4  |
| 1. Control (No intervencion No Diabetes) | 67,1  | 58,4  |
| 1. Control (No intervencion No Diabetes) | 65,2  | 64,8  |
| 2. Controles que SI desarrollan DMG      | 69,1  | 67,7  |
| 1. Control (No intervencion No Diabetes) | 82,3  | 73,3  |
| 1. Control (No intervencion No Diabetes) | 62,4  | NAN   |
| 1. Control (No intervencion No Diabetes) | 57,0  | 59,0  |
| 1. Control (No intervencion No Diabetes) | 58,5  | 51,1  |
| 2. Controles que SI desarrollan DMG      | 58,8  | 59,3  |
| 1. Control (No intervencion No Diabetes) | 74,5  | 74,9  |
| 2. Controles que SI desarrollan DMG      | 55,0  | 50,6  |
| 1. Control (No intervencion No Diabetes) | 54,3  | 48,1  |
| 2. Controles que SI desarrollan DMG      | 69,0  | 75,5  |
| 1. Control (No intervencion No Diabetes) | 79,3  | 79,0  |
| 1. Control (No intervencion No Diabetes) | 59,4  | 53,8  |
| 1. Control (No intervencion No Diabetes) | 62,1  | 60,6  |
| 1. Control (No intervencion No Diabetes) | 71,7  | NAN   |
| 1. Control (No intervencion No Diabetes) | 69,7  | 53,8  |
| 2. Controles que SI desarrollan DMG      | 61,9  | 55,6  |
| 1. Control (No intervencion No Diabetes) | 68,0  | 63,0  |
| 1. Control (No intervencion No Diabetes) | 47,8  | NAN   |

|                                          |      |      |
|------------------------------------------|------|------|
| 1. Control (No intervencion No Diabetes) | 58,6 | 53,6 |
| 1. Control (No intervencion No Diabetes) | 49,3 | 44,1 |
| 1. Control (No intervencion No Diabetes) | 66,5 | 60,2 |
| 1. Control (No intervencion No Diabetes) | 53,0 | 48,5 |
| 1. Control (No intervencion No Diabetes) | 66,0 | 58,3 |
| 1. Control (No intervencion No Diabetes) | 55,4 | 51,1 |
| 1. Control (No intervencion No Diabetes) | 71,1 | 57,7 |
| 1. Control (No intervencion No Diabetes) | 64,9 | 58,1 |
| 1. Control (No intervencion No Diabetes) | 61,2 | 57,9 |
| 1. Control (No intervencion No Diabetes) | 72,2 | 61,5 |
| 1. Control (No intervencion No Diabetes) | 65,3 | 70,0 |
| 1. Control (No intervencion No Diabetes) | 67,2 | 69,9 |
| 3. Intervencion que NO DMG               | 66,3 | 60,8 |
| 1. Control (No intervencion No Diabetes) | 65,5 | 59,7 |
| 2. Controles que SI desarrollan DMG      | 71,1 | 71,5 |
| 1. Control (No intervencion No Diabetes) | 69,5 | 59,0 |
| 2. Controles que SI desarrollan DMG      | 58,9 | 49,7 |
| 3. Intervencion que NO DMG               | 51,7 | NAN  |
| 2. Controles que SI desarrollan DMG      | 58,1 | 48,0 |
| 1. Control (No intervencion No Diabetes) | 65,8 | 57,6 |
| 3. Intervencion que NO DMG               | 60,5 | 56,3 |
| 1. Control (No intervencion No Diabetes) | 94,6 | 82,0 |
| 1. Control (No intervencion No Diabetes) | 72,1 | 68,4 |
| 3. Intervencion que NO DMG               | 60,4 | 52,0 |
| 4. Intervencion que SI hacen DMG         | 72,6 | 66,4 |
| 1. Control (No intervencion No Diabetes) | 52,5 | NAN  |
| 1. Control (No intervencion No Diabetes) | 57,7 | 47,0 |
| 3. Intervencion que NO DMG               | 64,7 | 62,4 |
| 4. Intervencion que SI hacen DMG         | 70,7 | 78,6 |
| 3. Intervencion que NO DMG               | 57,8 | 51,5 |
| 3. Intervencion que NO DMG               | 86,1 | 85,0 |
| 2. Controles que SI desarrollan DMG      | 65,5 | 64,5 |
| 3. Intervencion que NO DMG               | 64,5 | 58,0 |
| 3. Intervencion que NO DMG               | 60,7 | 56,7 |
| 2. Controles que SI desarrollan DMG      | 64,6 | 63,5 |
| 3. Intervencion que NO DMG               | 59,6 | NAN  |
| 2. Controles que SI desarrollan DMG      | 79,0 | 80,8 |
| 2. Controles que SI desarrollan DMG      | 63,7 | 57,7 |
| 1. Control (No intervencion No Diabetes) | 70,7 | 64,0 |
| 3. Intervencion que NO DMG               | 91,8 | 92,9 |
| 3. Intervencion que NO DMG               | 79,4 | NAN  |
| 4. Intervencion que SI hacen DMG         | 87,0 | 90,0 |
| 2. Controles que SI desarrollan DMG      | 73,8 | 69,0 |
| 3. Intervencion que NO DMG               | 62,9 | NAN  |
| 4. Intervencion que SI hacen DMG         | 91,3 | 81,0 |
| 4. Intervencion que SI hacen DMG         | 64,6 | 60,8 |
| 3. Intervencion que NO DMG               | 67,1 | 61,7 |
| 1. Control (No intervencion No Diabetes) | 59,1 | 57,1 |
| 3. Intervencion que NO DMG               | 78,8 | 71,6 |
| 2. Controles que SI desarrollan DMG      | 82,4 | 76,3 |

|                                          |       |      |
|------------------------------------------|-------|------|
| 4. Intervencion que SI hacen DMG         | 49,6  | 46,0 |
| 4. Intervencion que SI hacen DMG         | 69,2  | 64,7 |
| 3. Intervencion que NO DMG               | 63,5  | 57,5 |
| 3. Intervencion que NO DMG               | 57,4  | 49,3 |
| 4. Intervencion que SI hacen DMG         | 72,5  | 75,3 |
| 2. Controles que SI desarrollan DMG      | 62,3  | 52,5 |
| 3. Intervencion que NO DMG               | 58,5  | 52,0 |
| 3. Intervencion que NO DMG               | 63,1  | 54,6 |
| 3. Intervencion que NO DMG               | 67,2  | 64,5 |
| 3. Intervencion que NO DMG               | 66,9  | 62,0 |
| 3. Intervencion que NO DMG               | 79,5  | NAN  |
| 3. Intervencion que NO DMG               | 58,1  | 56,1 |
| 3. Intervencion que NO DMG               | 59,8  | 55,1 |
| 3. Intervencion que NO DMG               | 67,8  | 68,9 |
| 3. Intervencion que NO DMG               | 57,0  | 52,6 |
| 4. Intervencion que SI hacen DMG         | 104,0 | 96,0 |
| 3. Intervencion que NO DMG               | 69,4  | 64,9 |
| 3. Intervencion que NO DMG               | 72,5  | 69,7 |
| 4. Intervencion que SI hacen DMG         | 77,0  | 76,8 |
| 3. Intervencion que NO DMG               | 62,7  | 64,6 |
| 3. Intervencion que NO DMG               | 71,4  | 71,5 |
| 3. Intervencion que NO DMG               | 66,5  | 59,5 |
| 3. Intervencion que NO DMG               | 65,2  | NAN  |
| 3. Intervencion que NO DMG               | 54,5  | 53,0 |
| 4. Intervencion que SI hacen DMG         | 71,0  | 68,0 |
| 3. Intervencion que NO DMG               | 63,5  | 58,1 |
| 3. Intervencion que NO DMG               | 63,3  | 54,1 |
| 3. Intervencion que NO DMG               | 58,4  | 55,0 |
| 3. Intervencion que NO DMG               | 72,4  | 74,4 |
| 3. Intervencion que NO DMG               | 65,2  | 56,7 |
| 3. Intervencion que NO DMG               | 52,1  | NAN  |
| 3. Intervencion que NO DMG               | 58,8  | 55,4 |
| 3. Intervencion que NO DMG               | 68,2  | 64,5 |
| 3. Intervencion que NO DMG               | 58,3  | 52,7 |
| 4. Intervencion que SI hacen DMG         | 69,0  | 65,4 |
| 4. Intervencion que SI hacen DMG         | 69,0  | 57,9 |
| 3. Intervencion que NO DMG               | 74,1  | 67,8 |
| 3. Intervencion que NO DMG               | 75,1  | 73,2 |
| 3. Intervencion que NO DMG               | 75,8  | 63,3 |
| 4. Intervencion que SI hacen DMG         | 60,6  | NAN  |
| 3. Intervencion que NO DMG               | 58,7  | 51,0 |
| 4. Intervencion que SI hacen DMG         | 83,6  | 84,0 |
| 3. Intervencion que NO DMG               | 62,2  | 57,9 |
| 4. Intervencion que SI hacen DMG         | 63,6  | 54,0 |
| 1. Control (No intervencion No Diabetes) | 79,5  | 73,3 |
| 3. Intervencion que NO DMG               | 59,1  | 54,9 |
| 3. Intervencion que NO DMG               | 61,4  | 62,9 |
| 3. Intervencion que NO DMG               | 61,4  | 55,7 |
| 3. Intervencion que NO DMG               | 53,6  | 50,4 |
| 3. Intervencion que NO DMG               | 67,0  | 57,5 |

|                                     |       |      |
|-------------------------------------|-------|------|
| 2. Controles que SI desarrollan DMG | 81,2  | 80,0 |
| 3. Intervencion que NO DMG          | 64,8  | 57,3 |
| 3. Intervencion que NO DMG          | 62,0  | 58,1 |
| 3. Intervencion que NO DMG          | 73,4  | 63,9 |
| 3. Intervencion que NO DMG          | 54,8  | 54,1 |
| 3. Intervencion que NO DMG          | 68,2  | 61,5 |
| 3. Intervencion que NO DMG          | 83,5  | 73,8 |
| 2. Controles que SI desarrollan DMG | 83,3  | 97,0 |
| 3. Intervencion que NO DMG          | 65,1  | 54,6 |
| 3. Intervencion que NO DMG          | 60,0  | 54,4 |
| 3. Intervencion que NO DMG          | 58,8  | 55,2 |
| 3. Intervencion que NO DMG          | 64,4  | 68,9 |
| 3. Intervencion que NO DMG          | 65,7  | 61,0 |
| 3. Intervencion que NO DMG          | 82,0  | NAN  |
| 3. Intervencion que NO DMG          | 52,3  | 50,6 |
| 3. Intervencion que NO DMG          | 73,7  | NAN  |
| 3. Intervencion que NO DMG          | 63,5  | 65,5 |
| 4. Intervencion que SI hacen DMG    | 61,9  | 56,1 |
| 3. Intervencion que NO DMG          | 63,6  | NAN  |
| 3. Intervencion que NO DMG          | 90,0  | 77,2 |
| 3. Intervencion que NO DMG          | 73,8  | 75,5 |
| 2. Controles que SI desarrollan DMG | 54,0  | 46,1 |
| 3. Intervencion que NO DMG          | 74,8  | 69,3 |
| 3. Intervencion que NO DMG          | 60,2  | 54,0 |
| 3. Intervencion que NO DMG          | 76,2  | 82,5 |
| 3. Intervencion que NO DMG          | 69,4  | 67,2 |
| 4. Intervencion que SI hacen DMG    | 61,3  | 56,5 |
| 3. Intervencion que NO DMG          | 79,8  | 89,3 |
| 3. Intervencion que NO DMG          | 80,9  | 78,6 |
| 3. Intervencion que NO DMG          | 59,6  | NAN  |
| 2. Controles que SI desarrollan DMG | 58,7  | 54,2 |
| 4. Intervencion que SI hacen DMG    | 65,0  | 59,4 |
| 4. Intervencion que SI hacen DMG    | 66,1  | 60,5 |
| 3. Intervencion que NO DMG          | 59,7  | NAN  |
| 3. Intervencion que NO DMG          | 66,3  | 56,9 |
| 3. Intervencion que NO DMG          | 71,8  | 65,5 |
| 3. Intervencion que NO DMG          | 64,6  | 59,6 |
| 3. Intervencion que NO DMG          | 53,5  | 46,9 |
| 3. Intervencion que NO DMG          | 63,3  | 63,0 |
| 3. Intervencion que NO DMG          | 52,3  | 53,0 |
| 3. Intervencion que NO DMG          | 64,5  | 55,0 |
| 4. Intervencion que SI hacen DMG    | 60,2  | 55,8 |
| 3. Intervencion que NO DMG          | 63,7  | 60,7 |
| 4. Intervencion que SI hacen DMG    | 66,2  | 56,7 |
| 3. Intervencion que NO DMG          | 75,4  | 67,1 |
| 3. Intervencion que NO DMG          | 65,3  | NAN  |
| 3. Intervencion que NO DMG          | 100,0 | NAN  |
| 3. Intervencion que NO DMG          | 67,7  | 66,3 |
| 3. Intervencion que NO DMG          | 63,2  | NAN  |
| 4. Intervencion que SI hacen DMG    | 75,7  | 75,0 |

|                                          |      |      |
|------------------------------------------|------|------|
| 3. Intervencion que NO DMG               | 57,1 | 56,9 |
| 3. Intervencion que NO DMG               | 62,7 | 61,7 |
| 4. Intervencion que SI hacen DMG         | 78,0 | 83,1 |
| 4. Intervencion que SI hacen DMG         | 75,0 | 71,0 |
| 4. Intervencion que SI hacen DMG         | 66,3 | NAN  |
| 1. Control (No intervencion No Diabetes) | 73,8 | 63,3 |
| 4. Intervencion que SI hacen DMG         | 57,8 | 56,9 |
| 3. Intervencion que NO DMG               | 48,5 | 49,9 |
| 3. Intervencion que NO DMG               | 67,1 | 63,0 |
| 3. Intervencion que NO DMG               | 81,8 | 80,0 |
| 2. Controles que SI desarrollan DMG      | NAN  | 70,3 |
| 3. Intervencion que NO DMG               | 63,5 | 71,8 |
| 4. Intervencion que SI hacen DMG         | 60,1 | 53,5 |
| 4. Intervencion que SI hacen DMG         | 55,0 | 54,4 |
| 3. Intervencion que NO DMG               | 69,9 | NAN  |
| 3. Intervencion que NO DMG               | 73,2 | 77,0 |
| 3. Intervencion que NO DMG               | 59,9 | 58,5 |
| 3. Intervencion que NO DMG               | 68,4 | 62,2 |
| 3. Intervencion que NO DMG               | 65,7 | 64,4 |
| 3. Intervencion que NO DMG               | 56,0 | 53,0 |
| 3. Intervencion que NO DMG               | 62,3 | NAN  |
| 3. Intervencion que NO DMG               | 65,9 | 64,0 |
| 4. Intervencion que SI hacen DMG         | 99,0 | 73,9 |
| 3. Intervencion que NO DMG               | 88,3 | 84,0 |
| 4. Intervencion que SI hacen DMG         | 69,4 | 63,6 |
| 3. Intervencion que NO DMG               | 67,5 | NAN  |
| 3. Intervencion que NO DMG               | 82,3 | 86,0 |
| 3. Intervencion que NO DMG               | 51,2 | 46,7 |
| 3. Intervencion que NO DMG               | 67,4 | 58,0 |
| 3. Intervencion que NO DMG               | 66,0 | 66,9 |
| 3. Intervencion que NO DMG               | 61,6 | 55,5 |
| 4. Intervencion que SI hacen DMG         | 80,7 | NAN  |
| 4. Intervencion que SI hacen DMG         | 69,1 | 65,2 |
| 3. Intervencion que NO DMG               | 75,2 | 75,8 |
| 3. Intervencion que NO DMG               | 67,7 | NAN  |
| 1. Control (No intervencion No Diabetes) | 72,2 | NAN  |
| 3. Intervencion que NO DMG               | 62,2 | NAN  |
| 3. Intervencion que NO DMG               | 67,9 | 66,2 |
| 3. Intervencion que NO DMG               | 86,0 | 81,3 |
| 3. Intervencion que NO DMG               | 83,9 | NAN  |
| 1. Control (No intervencion No Diabetes) | NAN  | NAN  |
| 3. Intervencion que NO DMG               | 75,6 | 62,2 |
| 1. Control (No intervencion No Diabetes) | 81,1 | NAN  |
| 3. Intervencion que NO DMG               | 65,9 | 59,9 |
| 3. Intervencion que NO DMG               | 63,2 | NAN  |
| 3. Intervencion que NO DMG               | 59,0 | NAN  |
| 3. Intervencion que NO DMG               | 57,4 | 50,9 |
| 3. Intervencion que NO DMG               | 75,6 | NAN  |
| 3. Intervencion que NO DMG               | 61,1 | 52,8 |
| 2. Controles que SI desarrollan DMG      | 88,6 | NAN  |

|                                     |       |       |
|-------------------------------------|-------|-------|
| 3. Intervencion que NO DMG          | 72,5  | 63,6  |
| 4. Intervencion que SI hacen DMG    | 73,4  | 72,9  |
| 4. Intervencion que SI hacen DMG    | 79,1  | 61,0  |
| 3. Intervencion que NO DMG          | 62,9  | NAN   |
| 4. Intervencion que SI hacen DMG    | 71,7  | NAN   |
| 3. Intervencion que NO DMG          | 72,4  | 65,5  |
| 3. Intervencion que NO DMG          | 92,4  | 92,9  |
| 3. Intervencion que NO DMG          | 70,9  | 65,6  |
| 3. Intervencion que NO DMG          | 64,7  | 65,8  |
| 3. Intervencion que NO DMG          | 79,0  | 76,5  |
| 2. Controles que SI desarrollan DMG | 65,4  | NAN   |
| 2. Controles que SI desarrollan DMG | 72,0  | NAN   |
| 3. Intervencion que NO DMG          | 62,6  | NAN   |
| 3. Intervencion que NO DMG          | 101,3 | 101,0 |
| 4. Intervencion que SI hacen DMG    | 59,1  | 50,8  |
| 3. Intervencion que NO DMG          | 83,6  | 86,0  |

| FP Glucose (mg/dl) 24 gw | 1 h GTT (mg/dl) 24 gw | 2 h GTT (mg/dl) 24 gw |
|--------------------------|-----------------------|-----------------------|
| 76,0                     | 64,0                  | 77,0                  |
| 86,0                     | 101,0                 | 84,0                  |
| 88,0                     | 112,0                 | 96,0                  |
| 105,0                    | NAN                   | NAN                   |
| 91,0                     | 151,0                 | 129,0                 |
| 87,0                     | 117,0                 | 96,0                  |
| 88,0                     | 89,0                  | 92,0                  |
| 91,0                     | 148,0                 | 119,0                 |
| 98,0                     | NAN                   | NAN                   |
| 96,0                     | NAN                   | NAN                   |
| 82,0                     | 126,0                 | 154,0                 |
| 90,0                     | 171,0                 | 114,0                 |
| 92,0                     | 118,0                 | 109,0                 |
| 88,0                     | 133,0                 | 92,0                  |
| 84,0                     | 110,0                 | 84,0                  |
| 87,0                     | 70,0                  | 78,0                  |
| 79,0                     | 103,0                 | 91,0                  |
| 92,0                     | NAN                   | NAN                   |
| 77,0                     | 120,0                 | 76,0                  |
| 97,0                     | NAN                   | NAN                   |
| 84,0                     | 122,0                 | 131,0                 |
| 82,0                     | 140,0                 | 115,0                 |
| 88,0                     | 141,0                 | 106,0                 |
| 80,0                     | 173,0                 | 188,0                 |
| 92,0                     | 150,0                 | 133,0                 |
| 84,0                     | 77,0                  | 79,0                  |
| 93,0                     | 145,0                 | 107,0                 |
| 80,0                     | 102,0                 | 95,0                  |
| 103,0                    | NAN                   | NAN                   |
| 88,0                     | 153,0                 | 136,0                 |
| 93,0                     | 162,0                 | 144,0                 |
| 93,0                     | NAN                   | NAN                   |
| 100,0                    | 107,0                 | 126,0                 |
| 84,0                     | 144,0                 | 108,0                 |
| 83,0                     | 120,0                 | 109,0                 |
| 81,0                     | 56,0                  | 76,0                  |
| 80,0                     | 105,0                 | 86,0                  |
| 82,0                     | 184,0                 | 163,0                 |
| 86,0                     | 178,0                 | 112,0                 |
| 79,0                     | 120,0                 | 111,0                 |
| 93,0                     | 142,0                 | 107,0                 |
| 102,0                    | NAN                   | NAN                   |
| 82,0                     | 77,0                  | 80,0                  |
| 87,0                     | 137,0                 | 74,0                  |
| 88,0                     | 157,0                 | 115,0                 |
| 78,0                     | 60,0                  | 86,0                  |
| 83,0                     | 95,0                  | 108,0                 |

|      |       |       |
|------|-------|-------|
| 81,0 | 104,0 | 110,0 |
| 79,0 | 78,0  | 60,0  |
| 81,0 | 101,0 | NAN   |
| 91,0 | 115,0 | 111,0 |
| 77,0 | 148,0 | 112,0 |
| 93,0 | 145,0 | 127,0 |
| 81,0 | 77,0  | 83,0  |
| 80,0 | 153,0 | 126,0 |
| 81,0 | 101,0 | 100,0 |
| 79,0 | 144,0 | 77,0  |
| 87,0 | 111,0 | 105,0 |
| 72,0 | 104,0 | 98,0  |
| 82,0 | 97,0  | 69,0  |
| 90,0 | 134,0 | 101,0 |
| 90,0 | 151,0 | 121,0 |
| 87,0 | 89,0  | 91,0  |
| 87,0 | 155,0 | 150,0 |
| 83,0 | 161,0 | 118,0 |
| 82,0 | 131,0 | 95,0  |
| 83,0 | 96,0  | 118,0 |
| 82,0 | 128,0 | 100,0 |
| 88,0 | 127,0 | 121,0 |
| 86,0 | 119,0 | 100,0 |
| 80,0 | 87,0  | 120,0 |
| 77,0 | 94,0  | 103,0 |
| 82,0 | 124,0 | 110,0 |
| 94,0 | NAN   | NAN   |
| 96,0 | NAN   | NAN   |
| 81,0 | 84,0  | 99,0  |
| 83,0 | 63,0  | 91,0  |
| 77,0 | 83,0  | 67,0  |
| 91,0 | 80,0  | 88,0  |
| 96,0 | NAN   | NAN   |
| 70,0 | 138,0 | 101,0 |
| 84,0 | 119,0 | 98,0  |
| 85,0 | 110,0 | 95,0  |
| 69,0 | 137,0 | 102,0 |
| 81,0 | 194,0 | 156,0 |
| 82,0 | 132,0 | 120,0 |
| 86,0 | 203,0 | 165,0 |
| 91,0 | 127,0 | 139,0 |
| 99,0 | NAN   | NAN   |
| 84,0 | 168,0 | 93,0  |
| 85,0 | 106,0 | 108,0 |
| 81,0 | 75,0  | 86,0  |
| 85,0 | 148,0 | 145,0 |
| 84,0 | 84,0  | 108,0 |
| 95,0 | 152,0 | 179,0 |
| 90,0 | 135,0 | 102,0 |
| 82,0 | 123,0 | 132,0 |



|      |       |       |
|------|-------|-------|
| 86,0 | 159,0 | 80,0  |
| 84,0 | 69,0  | 79,0  |
| 82,0 | 73,0  | 79,0  |
| 88,0 | 113,0 | 140,0 |
| 87,0 | 144,0 | 88,0  |
| 88,0 | 125,0 | 130,0 |
| 82,0 | 98,0  | 82,0  |
| 87,0 | 175,0 | 151,0 |
| 88,0 | 139,0 | 142,0 |
| 90,0 | 114,0 | 83,0  |
| 73,0 | 102,0 | 125,0 |
| 87,0 | 146,0 | 115,0 |
| 80,0 | 97,0  | 89,0  |
| 80,0 | 157,0 | 123,0 |
| 96,0 | NAN   | NAN   |
| 89,0 | 133,0 | 99,0  |
| 80,0 | 158,0 | 164,0 |
| 89,0 | 109,0 | 137,0 |
| 74,0 | 172,0 | 166,0 |
| 82,0 | 107,0 | 111,0 |
| 85,0 | 124,0 | 95,0  |
| 89,0 | 134,0 | 127,0 |
| 83,0 | 140,0 | 69,0  |
| 86,0 | 107,0 | 103,0 |
| 97,0 | NAN   | NAN   |
| 82,0 | 108,0 | 85,0  |
| 80,0 | 142,0 | 101,0 |
| 84,0 | 136,0 | 122,0 |
| 99,0 | NAN   | NAN   |
| 84,0 | 114,0 | 90,0  |
| 90,0 | 152,0 | 144,0 |
| 91,0 | 206,0 | 96,0  |
| 81,0 | 149,0 | 72,0  |
| 86,0 | 109,0 | 105,0 |
| 88,0 | 100,0 | 165,0 |
| 82,0 | 87,0  | 74,0  |
| 98,0 | NAN   | NAN   |
| 93,0 | 130,0 | 126,0 |
| 85,0 | 104,0 | 103,0 |
| 80,0 | 130,0 | 108,0 |
| 83,0 | 170,0 | 130,0 |
| 86,0 | 160,0 | 165,0 |
| 96,0 | NAN   | NAN   |
| 79,0 | 95,0  | 96,0  |
| 84,0 | 180,0 | 146,0 |
| 86,0 | 208,0 | 181,0 |
| 82,0 | 133,0 | 110,0 |
| 85,0 | 59,0  | 80,0  |
| 76,0 | 83,0  | 58,0  |
| 95,0 | 166,0 | 123,0 |

|       |       |       |
|-------|-------|-------|
| 93,0  | 156,0 | 136,0 |
| 97,0  | NAN   | NAN   |
| 82,0  | 109,0 | 83,0  |
| 82,0  | 150,0 | 145,0 |
| 98,0  | NAN   | NAN   |
| 73,0  | 167,0 | 167,0 |
| 81,0  | 138,0 | 87,0  |
| 86,0  | 110,0 | 88,0  |
| 87,0  | 110,0 | 110,0 |
| 80,0  | 68,0  | 82,0  |
| 76,0  | 108,0 | 73,0  |
| 83,0  | 127,0 | 115,0 |
| 90,0  | 129,0 | 112,0 |
| 85,0  | 170,0 | 136,0 |
| 76,0  | 132,0 | 128,0 |
| 87,0  | 205,0 | 63,0  |
| 79,0  | 133,0 | 103,0 |
| 77,0  | 122,0 | 86,0  |
| 95,0  | 152,0 | 116,0 |
| 81,0  | 128,0 | 90,0  |
| 79,0  | 101,0 | 97,0  |
| 86,0  | 149,0 | 107,0 |
| 87,0  | 129,0 | 134,0 |
| 89,0  | 153,0 | 116,0 |
| 93,0  | NAN   | NAN   |
| 87,0  | 99,0  | 78,0  |
| 83,0  | 99,0  | 91,0  |
| 75,0  | 130,0 | 136,0 |
| 90,0  | 112,0 | 102,0 |
| 82,0  | 113,0 | 103,0 |
| 81,0  | 126,0 | 114,0 |
| 78,0  | 109,0 | 99,0  |
| 90,0  | 179,0 | 124,0 |
| 81,0  | 90,0  | 82,0  |
| 93,0  | 147,0 | 114,0 |
| 97,0  | 168,0 | 131,0 |
| 83,0  | 114,0 | 119,0 |
| 80,0  | 96,0  | 130,0 |
| 76,0  | 127,0 | 116,0 |
| 100,0 | 214,0 | 133,0 |
| 81,0  | 105,0 | 75,0  |
| 93,0  | 155,0 | 112,0 |
| 83,0  | 108,0 | 92,0  |
| 84,0  | 181,0 | 139,0 |
| 88,0  | 145,0 | 107,0 |
| 81,0  | 101,0 | 90,0  |
| 85,0  | 117,0 | 126,0 |
| 85,0  | 173,0 | 120,0 |
| 77,0  | 130,0 | 112,0 |
| 87,0  | 138,0 | 133,0 |

|       |       |       |
|-------|-------|-------|
| 93,0  | 189,0 | 145,0 |
| 86,0  | 111,0 | 112,0 |
| 90,0  | 142,0 | 139,0 |
| 85,0  | 115,0 | 102,0 |
| 83,0  | 118,0 | 131,0 |
| 82,0  | 105,0 | 65,0  |
| 83,0  | 86,0  | 103,0 |
| 92,0  | 80,0  | 90,0  |
| 83,0  | 94,0  | 97,0  |
| 82,0  | 111,0 | 113,0 |
| 70,0  | 123,0 | 108,0 |
| 81,0  | 167,0 | 128,0 |
| 89,0  | 129,0 | 129,0 |
| 88,0  | 152,0 | 109,0 |
| 79,0  | 162,0 | 112,0 |
| 84,0  | 114,0 | 94,0  |
| 77,0  | 105,0 | 63,0  |
| 88,0  | 208,0 | 126,0 |
| 87,0  | 89,0  | 77,0  |
| 118,0 | NAN   | NAN   |
| 85,0  | 99,0  | 108,0 |
| 88,0  | 189,0 | 169,0 |
| 87,0  | 175,0 | 146,0 |
| 76,0  | 90,0  | 99,0  |
| 84,0  | 99,0  | 87,0  |
| 88,0  | 165,0 | 110,0 |
| 94,0  | 180,0 | 133,0 |
| 75,0  | 102,0 | 94,0  |
| 90,0  | 110,0 | 78,0  |
| 82,0  | 116,0 | 106,0 |
| 93,0  | 108,0 | 93,0  |
| 98,0  | 110,0 | 93,0  |
| 95,0  | 147,0 | 112,0 |
| 76,0  | 117,0 | 108,0 |
| 87,0  | 158,0 | 131,0 |
| 87,0  | 85,0  | 84,0  |
| 83,0  | 123,0 | 104,0 |
| 78,0  | 95,0  | 84,0  |
| 85,0  | 87,0  | 115,0 |
| 74,0  | 82,0  | 97,0  |
| 81,0  | 159,0 | 132,0 |
| 90,0  | 192,0 | 156,0 |
| 78,0  | 121,0 | 113,0 |
| 98,0  | NAN   | NAN   |
| 79,0  | 118,0 | 89,0  |
| 77,0  | 102,0 | 100,0 |
| 86,0  | 65,0  | 69,0  |
| 91,0  | 158,0 | 150,0 |
| 82,0  | 83,0  | 68,0  |
| 105,0 | NAN   | NAN   |

|       |       |       |
|-------|-------|-------|
| 82,0  | 96,0  | 108,0 |
| 84,0  | 83,0  | 96,0  |
| 98,0  | NAN   | NAN   |
| 94,0  | 158,0 | 69,0  |
| 89,0  | 158,0 | 153,0 |
| 80,0  | 88,0  | 65,0  |
| 79,0  | 154,0 | 155,0 |
| 83,0  | 135,0 | 113,0 |
| 82,0  | 101,0 | 118,0 |
| 82,0  | 151,0 | 109,0 |
| 94,0  | NAN   | NAN   |
| 79,0  | 133,0 | 106,0 |
| 93,0  | 179,0 | 133,0 |
| 100,0 | NAN   | NAN   |
| 85,0  | 119,0 | 111,0 |
| 82,0  | 108,0 | 116,0 |
| 80,0  | 78,0  | 74,0  |
| 84,0  | 81,0  | 103,0 |
| 86,0  | 123,0 | 91,0  |
| 81,0  | 91,0  | 88,0  |
| 80,0  | 126,0 | 145,0 |
| 83,0  | 127,0 | 103,0 |
| 94,0  | 125,0 | 94,0  |
| 75,0  | 88,0  | 102,0 |
| 97,0  | 89,0  | 94,0  |
| 82,0  | 165,0 | 144,0 |
| 85,0  | 110,0 | 117,0 |
| 82,0  | 102,0 | 104,0 |
| 81,0  | 151,0 | 122,0 |
| 88,0  | 120,0 | 123,0 |
| 85,0  | 125,0 | 112,0 |
| 85,0  | 166,0 | 173,0 |
| 100,0 | NAN   | NAN   |
| 79,0  | 71,0  | 73,0  |
| 82,0  | 146,0 | 141,0 |
| 84,0  | 133,0 | 129,0 |
| 81,0  | 86,0  | 91,0  |
| 73,0  | 142,0 | 64,0  |
| 89,0  | 126,0 | 100,0 |
| 87,0  | 109,0 | 152,0 |
| 89,0  | 125,0 | 91,0  |
| 86,0  | 98,0  | 88,0  |
| 86,0  | 108,0 | 93,0  |
| 80,0  | 160,0 | 140,0 |
| 91,0  | 177,0 | 105,0 |
| 81,0  | 110,0 | 84,0  |
| 82,0  | 133,0 | 93,0  |
| 85,0  | 138,0 | 106,0 |
| 79,0  | 100,0 | 105,0 |
| 92,0  | 106,0 | 105,0 |

|       |       |       |
|-------|-------|-------|
| 79,0  | 92,0  | 113,0 |
| 101,0 | NAN   | NAN   |
| 97,0  | NAN   | NAN   |
| 87,0  | 144,0 | 119,0 |
| 94,0  | NAN   | NAN   |
| 84,0  | 133,0 | 119,0 |
| 88,1  | 125,0 | 100,0 |
| 82,0  | 107,0 | 116,0 |
| 85,0  | 111,0 | 111,0 |
| 88,0  | 168,0 | 100,0 |
| 95,0  | NAN   | NAN   |
| 92,0  | 179,0 | 155,0 |
| 82,0  | 103,0 | 82,0  |
| 88,0  | 154,0 | 125,0 |
| 80,0  | 190,0 | 188,0 |
| 90,0  | 154,0 | 144,0 |

| FP Glucose (mg/dl) 2 years PD | 2 h GTT (mg/dl) 2 years PD | sBP (mm Hg) 24 GW | dBp (mm Hg) 24 GW | sBP (mm Hg) 2 Yrs PD |
|-------------------------------|----------------------------|-------------------|-------------------|----------------------|
| 82,0                          | 63,0                       | NAN               | NAN               | 99,0                 |
| 92,0                          | 108,0                      | NAN               | NAN               | 117,0                |
| 96,0                          | 114,0                      | NAN               | NAN               | NAN                  |
| 101,0                         | 110,0                      | NAN               | NAN               | NAN                  |
| 103,0                         | 74,0                       | NAN               | NAN               | 108,0                |
| 98,0                          | 99,0                       | NAN               | NAN               | 116,0                |
| 91,0                          | NAN                        | NAN               | NAN               | NAN                  |
| 90,0                          | 96,0                       | NAN               | NAN               | 103,0                |
| 93,0                          | NAN                        | NAN               | NAN               | 122,0                |
| 101,0                         | 128,0                      | NAN               | NAN               | NAN                  |
| 88,0                          | NAN                        | NAN               | NAN               | 106,0                |
| 105,0                         | NAN                        | NAN               | NAN               | 113,0                |
| 89,0                          | NAN                        | NAN               | NAN               | NAN                  |
| 96,0                          | 86,0                       | NAN               | NAN               | 111,0                |
| 79,0                          | NAN                        | NAN               | NAN               | 113,0                |
| 89,0                          | NAN                        | 99,0              | 64,0              | 105,0                |
| 75,0                          | NAN                        | NAN               | NAN               | NAN                  |
| 90,0                          | 100,0                      | 99,0              | 58,0              | 111,0                |
| 94,0                          | 102,0                      | 107,0             | 72,0              | 111,0                |
| 100,0                         | NAN                        | 106,0             | 61,0              | 105,0                |
| 91,0                          | 121,0                      | 102,0             | 68,0              | 116,0                |
| 97,0                          | 91,0                       | 104,0             | 57,0              | 115,0                |
| 101,0                         | NAN                        | NAN               | NAN               | NAN                  |
| 87,0                          | NAN                        | 101,0             | 76,0              | 99,0                 |
| 98,0                          | NAN                        | 129,0             | 73,0              | 113,0                |
| 97,0                          | NAN                        | 94,0              | 53,0              | NAN                  |
| 97,0                          | NAN                        | 110,0             | 69,0              | 111,0                |
| 100,0                         | NAN                        | 94,0              | 55,0              | 115,0                |
| 104,0                         | 80,0                       | 106,0             | 64,0              | 120,0                |
| 94,0                          | 85,0                       | 114,0             | 71,0              | 106,0                |
| 105,0                         | NAN                        | 100,0             | 74,0              | 115,0                |
| 102,0                         | 112,0                      | 100,0             | 60,0              | 102,0                |
| 96,0                          | NAN                        | 98,0              | 47,0              | 106,0                |
| 94,0                          | NAN                        | 117,0             | 72,0              | 116,0                |
| 90,0                          | NAN                        | 107,0             | 59,0              | NAN                  |
| 86,0                          | 99,0                       | 88,0              | 53,0              | 103,0                |
| 98,0                          | 94,0                       | 89,0              | 53,0              | 101,0                |
| 87,0                          | NAN                        | 103,0             | 59,0              | 130,0                |
| 96,0                          | NAN                        | 91,0              | 56,0              | NAN                  |
| 84,0                          | NAN                        | 108,0             | 63,0              | NAN                  |
| 97,0                          | NAN                        | 110,0             | 63,0              | NAN                  |
| 101,0                         | 90,0                       | 106,0             | 65,0              | 125,0                |
| 92,0                          | 83,0                       | 104,0             | 62,0              | NAN                  |
| 88,0                          | 76,0                       | 112,0             | 56,0              | 111,0                |
| 94,0                          | NAN                        | 90,0              | 64,0              | NAN                  |
| 86,0                          | 90,0                       | 94,0              | 49,0              | 97,0                 |
| 94,0                          | NAN                        | 100,0             | 53,0              | 106,0                |

|       |       |       |       |       |
|-------|-------|-------|-------|-------|
| 83,0  | 97,0  | 92,0  | 62,0  | 94,0  |
| 88,0  | NAN   | 90,0  | 52,0  | 108,0 |
| 88,0  | NAN   | 109,0 | 71,0  | 122,0 |
| 97,0  | NAN   | 108,0 | 80,0  | 115,0 |
| 90,0  | NAN   | 106,0 | 57,0  | 104,0 |
| 94,0  | 184,0 | 127,0 | 76,0  | 135,0 |
| 85,0  | 82,0  | 120,0 | 74,0  | 121,0 |
| 91,0  | NAN   | 97,0  | 58,0  | NAN   |
| 85,0  | NAN   | 110,0 | 60,0  | 102,0 |
| 82,0  | NAN   | 103,0 | 53,0  | 91,0  |
| 92,0  | 95,0  | 126,0 | 80,0  | 110,0 |
| 85,0  | 111,0 | 107,0 | 53,0  | NAN   |
| 95,0  | 101,0 | 85,0  | 57,0  | 88,0  |
| 95,0  | NAN   | 118,0 | 63,0  | 124,0 |
| 99,0  | 93,0  | 102,0 | 49,0  | 98,0  |
| 88,0  | 95,0  | 108,0 | 60,0  | NAN   |
| 107,0 | NAN   | 93,0  | 54,0  | 107,0 |
| 90,0  | 139,0 | 89,0  | 53,0  | 112,0 |
| 92,0  | NAN   | 117,0 | 65,0  | 134,0 |
| 96,0  | 84,0  | 98,0  | 65,0  | 120,0 |
| 87,0  | NAN   | 110,0 | 67,0  | 117,0 |
| 91,0  | 113,0 | 100,0 | 52,0  | 100,0 |
| 90,0  | NAN   | 103,0 | 67,0  | 116,0 |
| 88,0  | NAN   | 103,0 | 64,0  | 117,0 |
| 88,0  | 94,0  | NAN   | NAN   | NAN   |
| 101,0 | NAN   | 117,0 | 48,0  | NAN   |
| 94,0  | 70,0  | 99,0  | 59,0  | 104,0 |
| 101,0 | NAN   | 106,0 | 63,0  | NAN   |
| 92,0  | 104,0 | 105,0 | 62,0  | 114,0 |
| 85,0  | NAN   | 108,0 | 61,0  | 120,0 |
| 95,0  | NAN   | 88,0  | 56,0  | 100,0 |
| 90,0  | 157,0 | 90,0  | 52,0  | 118,0 |
| 104,0 | 109,0 | 102,0 | 63,0  | 117,0 |
| 84,0  | 115,0 | 103,0 | 62,0  | NAN   |
| 89,0  | 73,0  | 96,0  | 56,0  | 105,0 |
| 89,0  | 99,0  | 95,0  | 51,0  | 95,0  |
| 86,0  | 47,0  | 110,0 | 61,0  | 103,0 |
| 117,0 | NAN   | 112,0 | 69,0  | 120,0 |
| 86,0  | NAN   | 122,0 | 77,0  | 115,0 |
| 100,0 | 118,0 | 107,0 | 73,0  | 120,0 |
| 94,0  | 149,0 | 93,0  | 58,0  | 97,0  |
| 108,0 | 157,0 | 91,0  | 58,0  | 120,0 |
| 92,0  | NAN   | 115,0 | 75,0  | 117,0 |
| 101,0 | NAN   | 87,0  | 55,0  | 100,0 |
| 81,0  | NAN   | 97,0  | 64,0  | 117,0 |
| 97,0  | 106,0 | 96,0  | 49,0  | NAN   |
| 98,0  | NAN   | 104,0 | 74,0  | 114,0 |
| 91,0  | 99,0  | 120,0 | 74,0  | 120,0 |
| 90,0  | NAN   | 109,0 | 63,0  | NAN   |
| 97,0  | 109,0 | 153,0 | 101,0 | 92,0  |

|       |       |       |      |       |
|-------|-------|-------|------|-------|
| 94,0  | 89,0  | 102,0 | 53,0 | 100,0 |
| 84,0  | 70,0  | 98,0  | 57,0 | 107,0 |
| 94,0  | 76,0  | 88,0  | 67,0 | 111,0 |
| 89,0  | 78,0  | 90,0  | 56,0 | 100,0 |
| 88,0  | 98,0  | 112,0 | 68,0 | 113,0 |
| 91,0  | 94,0  | 117,0 | 76,0 | 105,0 |
| 94,0  | NAN   | 92,0  | 55,0 | NAN   |
| 91,0  | NAN   | 86,0  | 46,0 | 102,0 |
| 101,0 | NAN   | 104,0 | 62,0 | NAN   |
| 92,0  | NAN   | 96,0  | 68,0 | NAN   |
| 87,0  | NAN   | 100,0 | 67,0 | NAN   |
| 102,0 | NAN   | 120,0 | 63,0 | 127,0 |
| 93,0  | 75,0  | 99,0  | 59,0 | 117,0 |
| 94,0  | NAN   | 100,0 | 52,0 | 108,0 |
| 96,0  | 99,0  | 115,0 | 79,0 | 113,0 |
| 94,0  | 80,0  | 86,0  | 54,0 | 98,0  |
| 88,0  | NAN   | 113,0 | 60,0 | 104,0 |
| 87,0  | NAN   | 103,0 | 66,0 | NAN   |
| 82,0  | 87,0  | 102,0 | 68,0 | NAN   |
| 90,0  | 77,0  | 103,0 | 64,0 | NAN   |
| 90,0  | 87,0  | 101,0 | 62,0 | 93,0  |
| 86,0  | NAN   | 107,0 | 72,0 | 120,0 |
| 93,0  | 49,0  | 96,0  | 59,0 | NAN   |
| 79,0  | 93,0  | 98,0  | 59,0 | 94,0  |
| 96,0  | 117,0 | 99,0  | 62,0 | 119,0 |
| 87,0  | NAN   | 97,0  | 50,0 | 119,0 |
| 89,0  | NAN   | 91,0  | 57,0 | 96,0  |
| 93,0  | NAN   | 146,0 | 83,0 | NAN   |
| 96,0  | 96,0  | 93,0  | 53,0 | 108,0 |
| 92,0  | 81,0  | 99,0  | 62,0 | 117,0 |
| 93,0  | NAN   | 121,0 | 73,0 | 123,0 |
| 102,0 | NAN   | 116,0 | 52,0 | NAN   |
| 96,0  | 64,0  | 116,0 | 64,0 | 122,0 |
| 94,0  | NAN   | 90,0  | 64,0 | NAN   |
| 112,0 | NAN   | 104,0 | 63,0 | NAN   |
| 86,0  | NAN   | 105,0 | 65,0 | NAN   |
| 101,0 | NAN   | 94,0  | 55,0 | 132,0 |
| 107,0 | 91,0  | 108,0 | 74,0 | NAN   |
| 94,0  | NAN   | 107,0 | 70,0 | 118,0 |
| 89,0  | NAN   | 130,0 | 78,0 | NAN   |
| 91,0  | 87,0  | 110,0 | 65,0 | NAN   |
| 105,0 | NAN   | 136,0 | 89,0 | 138,0 |
| 99,0  | 93,0  | 101,0 | 61,0 | 113,0 |
| 97,0  | 73,0  | 97,0  | 59,0 | NAN   |
| 90,0  | 104,0 | 117,0 | 68,0 | 118,0 |
| 94,0  | NAN   | 108,0 | 64,0 | 110,0 |
| 93,0  | NAN   | 110,0 | 73,0 | 95,0  |
| 96,0  | NAN   | 88,0  | 54,0 | 104,0 |
| 82,0  | 89,0  | 119,0 | 68,0 | 113,0 |
| 93,0  | 75,0  | 110,0 | 64,0 | 107,0 |



|       |       |       |      |       |
|-------|-------|-------|------|-------|
| 95,0  | 114,0 | 107,0 | 75,0 | NAN   |
| 95,0  | NAN   | 112,0 | 60,0 | 96,0  |
| 82,0  | 100,0 | 118,0 | 72,0 | 123,0 |
| 94,0  | NAN   | 98,0  | 62,0 | 94,0  |
| 97,0  | 102,0 | 109,0 | 86,0 | 108,0 |
| 93,0  | NAN   | 99,0  | 68,0 | 110,0 |
| 83,0  | 66,0  | 111,0 | 73,0 | 113,0 |
| 87,0  | NAN   | 87,0  | 53,0 | 92,0  |
| 87,0  | 77,0  | 112,0 | 67,0 | 120,0 |
| 102,0 | NAN   | 97,0  | 51,0 | 105,0 |
| 84,0  | NAN   | 111,0 | 72,0 | NAN   |
| 87,0  | NAN   | 93,0  | 49,0 | 114,0 |
| 94,0  | NAN   | 106,0 | 63,0 | 117,0 |
| 100,0 | NAN   | 112,0 | 78,0 | 114,0 |
| 95,0  | 89,0  | 110,0 | 73,0 | 116,0 |
| 91,0  | NAN   | 105,0 | 68,0 | NAN   |
| 97,0  | 107,0 | 137,0 | 81,0 | 129,0 |
| 88,0  | NAN   | 90,0  | 57,0 | 113,0 |
| 94,0  | 82,0  | 107,0 | 66,0 | 101,0 |
| 93,0  | NAN   | 113,0 | 74,0 | 119,0 |
| 87,0  | NAN   | 97,0  | 60,0 | 117,0 |
| 87,0  | 92,0  | 101,0 | 58,0 | 110,0 |
| 96,0  | 93,0  | 104,0 | 69,0 | NAN   |
| 92,0  | NAN   | 85,0  | 50,0 | 101,0 |
| 109,0 | 118,0 | 88,0  | 54,0 | NAN   |
| 95,0  | NAN   | 102,0 | 55,0 | 119,0 |
| 80,0  | NAN   | 101,0 | 61,0 | 93,0  |
| 99,0  | NAN   | 107,0 | 65,0 | 112,0 |
| 95,0  | 102,0 | 129,0 | 77,0 | 132,0 |
| 93,0  | 97,0  | 105,0 | 47,0 | NAN   |
| 89,0  | 64,0  | 86,0  | 46,0 | NAN   |
| 88,0  | NAN   | 86,0  | 50,0 | 99,0  |
| 86,0  | NAN   | 106,0 | 60,0 | 121,0 |
| 103,0 | NAN   | 99,0  | 72,0 | 97,0  |
| 97,0  | 141,0 | 111,0 | 63,0 | 117,0 |
| 95,0  | 68,0  | 82,0  | 55,0 | 98,0  |
| 86,0  | NAN   | 96,0  | 64,0 | 116,0 |
| 84,0  | NAN   | 102,0 | 58,0 | NAN   |
| 83,0  | NAN   | 110,0 | 66,0 | 93,0  |
| 93,0  | 97,0  | 98,0  | 55,0 | NAN   |
| 93,0  | 141,0 | 85,0  | 51,0 | NAN   |
| 85,0  | NAN   | 122,0 | 59,0 | 129,0 |
| 91,0  | 62,0  | 92,0  | 59,0 | NAN   |
| 94,0  | 71,0  | 130,0 | 63,0 | 129,0 |
| 95,0  | NAN   | 122,0 | 57,0 | 142,0 |
| 89,0  | NAN   | 102,0 | 59,0 | 107,0 |
| 91,0  | NAN   | 94,0  | 57,0 | NAN   |
| 93,0  | NAN   | 94,0  | 56,0 | 115,0 |
| 86,0  | NAN   | 94,0  | 73,0 | 101,0 |
| 97,0  | 100,0 | 96,0  | 61,0 | NAN   |

|       |       |       |      |       |
|-------|-------|-------|------|-------|
| 96,0  | 77,0  | 120,0 | 74,0 | 110,0 |
| 86,0  | NAN   | 105,0 | 60,0 | 123,0 |
| 100,0 | 91,0  | 95,0  | 84,0 | 107,0 |
| 82,0  | NAN   | 105,0 | 64,0 | 99,0  |
| 99,0  | 116,0 | 96,0  | 56,0 | 108,0 |
| 101,0 | NAN   | 107,0 | 69,0 | 123,0 |
| 89,0  | 89,0  | 109,0 | 58,0 | 107,0 |
| 100,0 | 87,0  | 127,0 | 81,0 | 135,0 |
| 88,0  | 98,0  | 134,0 | 74,0 | 130,0 |
| 92,0  | NAN   | 104,0 | 59,0 | 100,0 |
| 96,0  | 105,0 | 90,0  | 55,0 | NAN   |
| 87,0  | NAN   | 107,0 | 64,0 | 120,0 |
| 97,0  | NAN   | 103,0 | 60,0 | 114,0 |
| 91,0  | 102,0 | 118,0 | 73,0 | NAN   |
| 88,0  | NAN   | 99,0  | 62,0 | 134,0 |
| 107,0 | 92,0  | 115,0 | 71,0 | NAN   |
| 80,0  | 93,0  | 94,0  | 63,0 | 110,0 |
| 87,0  | NAN   | 101,0 | 69,0 | NAN   |
| 99,0  | 105,0 | 97,0  | 57,0 | NAN   |
| 96,0  | 99,0  | 122,0 | 76,0 | 135,0 |
| 95,0  | 92,0  | 109,0 | 54,0 | 110,0 |
| 93,0  | NAN   | 92,0  | 65,0 | 97,0  |
| 88,0  | NAN   | 120,0 | 71,0 | 113,0 |
| 76,0  | NAN   | 96,0  | 85,0 | 120,0 |
| 95,0  | NAN   | 95,0  | 62,0 | NAN   |
| 97,0  | 87,0  | 103,0 | 57,0 | 108,0 |
| 97,0  | 97,0  | 106,0 | 59,0 | 110,0 |
| 94,0  | 110,0 | NAN   | NAN  | 112,0 |
| 93,0  | 60,0  | 99,0  | 65,0 | 115,0 |
| 92,0  | NAN   | 104,0 | 57,0 | NAN   |
| 94,0  | 95,0  | 107,0 | 68,0 | 119,0 |
| 100,0 | 87,0  | 99,0  | 59,0 | 118,0 |
| 98,0  | NAN   | 108,0 | 61,0 | 109,0 |
| 103,0 | 118,0 | 99,0  | 55,0 | 111,0 |
| 91,0  | NAN   | 97,0  | 56,0 | 106,0 |
| 98,0  | 93,0  | 115,0 | 71,0 | 117,0 |
| 89,0  | NAN   | 109,0 | 70,0 | 119,0 |
| 87,0  | 84,0  | 102,0 | 57,0 | 91,0  |
| 98,0  | 90,0  | 96,0  | 57,0 | 87,0  |
| 83,0  | 106,0 | 103,0 | 60,0 | 121,0 |
| 101,0 | 107,0 | 108,0 | 72,0 | 119,0 |
| 110,0 | 140,0 | 105,0 | 52,0 | 113,0 |
| 91,0  | 128,0 | 102,0 | 43,0 | 101,0 |
| 94,0  | NAN   | 118,0 | 68,0 | 112,0 |
| 87,0  | NAN   | 96,0  | 62,0 | 108,0 |
| 104,0 | NAN   | 97,0  | 57,0 | NAN   |
| 92,0  | 77,0  | 113,0 | 62,0 | 104,0 |
| 98,0  | NAN   | 112,0 | 66,0 | NAN   |
| 84,0  | NAN   | 106,0 | 62,0 | NAN   |
| 97,0  | 128,0 | 110,0 | 69,0 | 117,0 |

|       |       |       |      |       |
|-------|-------|-------|------|-------|
| 93,0  | NAN   | 88,0  | 57,0 | 111,0 |
| 80,0  | 84,0  | 106,0 | 60,0 | 103,0 |
| 111,0 | 153,0 | 112,0 | 71,0 | NAN   |
| 104,0 | 131,0 | 103,0 | 61,0 | NAN   |
| 89,0  | 62,0  | 112,0 | 62,0 | 109,0 |
| 87,0  | NAN   | 106,0 | 60,0 | 109,0 |
| 85,0  | 102,0 | 100,0 | 67,0 | 116,0 |
| 86,0  | NAN   | 98,0  | 64,0 | 107,0 |
| 99,0  | 115,0 | 94,0  | 61,0 | 117,0 |
| 96,0  | 80,0  | 110,0 | 65,0 | 118,0 |
| 103,0 | NAN   | NAN   | NAN  | 108,0 |
| 93,0  | 103,0 | 90,0  | 47,0 | 106,0 |
| 87,0  | NAN   | 88,0  | 50,0 | 100,0 |
| 102,0 | 115,0 | 116,0 | 81,0 | 103,0 |
| 96,0  | 126,0 | 122,0 | 75,0 | 137,0 |
| 93,0  | 117,0 | 113,0 | 73,0 | 119,0 |
| 99,0  | NAN   | 100,0 | 59,0 | NAN   |
| 82,0  | 77,0  | 101,0 | 48,0 | 117,0 |
| 100,0 | 104,0 | 112,0 | 66,0 | NAN   |
| 89,0  | 88,0  | 101,0 | 47,0 | 86,0  |
| 92,0  | NAN   | 101,0 | 57,0 | 103,0 |
| 93,0  | NAN   | 111,0 | 68,0 | 122,0 |
| 96,0  | 82,0  | 93,0  | 62,0 | 103,0 |
| 90,0  | NAN   | 107,0 | 68,0 | 113,0 |
| 97,0  | 132,0 | 96,0  | 54,0 | NAN   |
| 77,0  | NAN   | 96,0  | 60,0 | NAN   |
| 95,0  | 119,0 | 109,0 | 73,0 | 120,0 |
| 91,0  | 108,0 | 100,0 | 59,0 | 99,0  |
| 90,0  | NAN   | 95,0  | 73,0 | 90,0  |
| 95,0  | 100,0 | 106,0 | 54,0 | 101,0 |
| 84,0  | 79,0  | 103,0 | 64,0 | 135,0 |
| 103,0 | 250,0 | 110,0 | 66,0 | NAN   |
| 108,0 | 76,0  | NAN   | NAN  | 104,0 |
| 85,0  | 69,0  | 112,0 | 66,0 | 124,0 |
| 87,0  | 106,0 | 91,0  | 64,0 | NAN   |
| 93,0  | NAN   | 86,0  | 48,0 | NAN   |
| 96,0  | NAN   | 106,0 | 47,0 | NAN   |
| 89,0  | 67,0  | 88,0  | 61,0 | 104,0 |
| 91,0  | 94,0  | 127,0 | 61,0 | 116,0 |
| 96,0  | 110,0 | 100,0 | 60,0 | NAN   |
| 92,0  | 115,0 | NAN   | NAN  | 118,0 |
| 95,0  | 121,0 | 125,0 | 70,0 | 112,0 |
| 89,0  | 91,0  | 98,0  | 53,0 | NAN   |
| 99,0  | 73,0  | 89,0  | 73,0 | 103,0 |
| 95,0  | NAN   | 104,0 | 66,0 | NAN   |
| 90,0  | 100,0 | 103,0 | 67,0 | NAN   |
| 101,0 | NAN   | 104,0 | 55,0 | 123,0 |
| 86,0  | NAN   | 108,0 | 57,0 | NAN   |
| 92,0  | 83,0  | 98,0  | 66,0 | 107,0 |
| 107,0 | 105,0 | 134,0 | 74,0 | NAN   |

|       |       |       |      |       |
|-------|-------|-------|------|-------|
| 92,0  | 127,0 | 115,0 | 81,0 | 122,0 |
| 97,0  | 146,0 | 117,0 | 70,0 | 122,0 |
| 85,0  | NAN   | 129,0 | 76,0 | 112,0 |
| 98,0  | 100,0 | 84,0  | 49,0 | 85,0  |
| 96,0  | 85,0  | 127,0 | 74,0 | NAN   |
| 87,0  | 118,0 | 106,0 | 55,0 | NAN   |
| 98,0  | 102,0 | 120,0 | 74,0 | 125,0 |
| 98,0  | 66,0  | 100,0 | 41,0 | 113,0 |
| 92,0  | 88,0  | 110,0 | 61,0 | 117,0 |
| 110,0 | NAN   | 142,0 | 89,0 | 168,0 |
| 108,0 | 136,0 | 90,0  | 59,0 | NAN   |
| 105,0 | NAN   | 98,0  | 62,0 | 108,0 |
| 95,0  | 126,0 | 114,0 | 82,0 | NAN   |
| 103,0 | NAN   | 100,0 | 50,0 | NAN   |
| 99,0  | 129,0 | 112,0 | 60,0 | 117,0 |
| 106,0 | 78,0  | 100,0 | 60,0 | NAN   |

| <b>dBp (mm Hg) 2<br/>Yrs PD</b> | <b>T-Chol (mg/dl) 24<br/>gw</b> | <b>T-Chol (mg/dl)<br/>2 years PD</b> | <b>Triglycerides (g/L) 24<br/>gw</b> | <b>Triglycerides<br/>(g/L) 2 Yrs PD</b> |
|---------------------------------|---------------------------------|--------------------------------------|--------------------------------------|-----------------------------------------|
| 64,0                            | 295,0                           | 152,0                                | 151,0                                | 46,0                                    |
| 73,0                            | NAN                             | 193,0                                | NAN                                  | 76,0                                    |
| NAN                             | 300,0                           | 206,0                                | 158,0                                | 101,0                                   |
| NAN                             | NAN                             | 210,0                                | NAN                                  | 187,0                                   |
| 72,0                            | 210,0                           | 148,0                                | 83,0                                 | 35,0                                    |
| 75,0                            | 133,0                           | 105,0                                | 142,0                                | 50,0                                    |
| NAN                             | 251,0                           | 170,0                                | 118,0                                | 58,0                                    |
| 71,0                            | NAN                             | 225,0                                | NAN                                  | 67,0                                    |
| 77,0                            | 237,0                           | 196,0                                | 125,0                                | 83,0                                    |
| NAN                             | 210,0                           | 134,0                                | 147,0                                | 183,0                                   |
| 72,0                            | NAN                             | 179,0                                | NAN                                  | 82,0                                    |
| 73,0                            | 282,0                           | 208,0                                | 165,0                                | 62,0                                    |
| NAN                             | 233,0                           | 183,0                                | 124,0                                | 48,0                                    |
| 70,0                            | 219,0                           | 167,0                                | 163,0                                | 93,0                                    |
| 69,0                            | 222,0                           | 138,0                                | 149,0                                | 58,0                                    |
| 71,0                            | 288,0                           | 194,0                                | 146,0                                | 52,0                                    |
| NAN                             | 244,0                           | 114,0                                | 99,0                                 | 56,0                                    |
| 65,0                            | 160,0                           | 102,0                                | 182,0                                | 54,0                                    |
| 74,0                            | NAN                             | 172,0                                | NAN                                  | 72,0                                    |
| 75,0                            | 268,0                           | 223,0                                | 259,0                                | 136,0                                   |
| 70,0                            | 300,0                           | 168,0                                | 166,0                                | 55,0                                    |
| 63,0                            | 218,0                           | 165,0                                | 168,0                                | 75,0                                    |
| NAN                             | 259,0                           | 226,0                                | 159,0                                | 150,0                                   |
| 66,0                            | NAN                             | 150,0                                | 146,0                                | 37,0                                    |
| 80,0                            | 292,0                           | 205,0                                | 253,0                                | 134,0                                   |
| NAN                             | 248,0                           | 150,0                                | 245,0                                | 81,0                                    |
| 78,0                            | 362,0                           | 202,0                                | 217,0                                | 166,0                                   |
| 74,0                            | NAN                             | 188,0                                | NAN                                  | 190,0                                   |
| 80,0                            | 301,0                           | 237,0                                | 125,0                                | 73,0                                    |
| 64,0                            | 279,0                           | 196,0                                | 212,0                                | 118,0                                   |
| 74,0                            | 256,0                           | 213,0                                | 354,0                                | 138,0                                   |
| 64,0                            | NAN                             | 184,0                                | NAN                                  | 51,0                                    |
| 73,0                            | 293,0                           | 158,0                                | 125,0                                | 35,0                                    |
| 68,0                            | 150,0                           | 123,0                                | 256,0                                | 65,0                                    |
| NAN                             | 234,0                           | 177,0                                | 161,0                                | 83,0                                    |
| 67,0                            | NAN                             | 137,0                                | NAN                                  | 82,0                                    |
| 68,0                            | NAN                             | 172,0                                | NAN                                  | 45,0                                    |
| 75,0                            | 191,0                           | 148,0                                | 161,0                                | 112,0                                   |
| NAN                             | 212,0                           | 213,0                                | 210,0                                | 109,0                                   |
| NAN                             | 257,0                           | 155,0                                | 177,0                                | 69,0                                    |
| NAN                             | 246,0                           | 163,0                                | 171,0                                | 94,0                                    |
| 75,0                            | 301,0                           | 217,0                                | 160,0                                | 151,0                                   |
| NAN                             | 168,0                           | 148,0                                | 62,0                                 | 40,0                                    |
| 66,0                            | 345,0                           | 164,0                                | 268,0                                | 122,0                                   |
| NAN                             | 298,0                           | 176,0                                | 127,0                                | 90,0                                    |
| 61,0                            | 285,0                           | 183,0                                | 155,0                                | 52,0                                    |
| 63,0                            | 289,0                           | 187,0                                | 255,0                                | 66,0                                    |

|      |       |       |       |       |
|------|-------|-------|-------|-------|
| 54,0 | 360,0 | 151,0 | 112,0 | 71,0  |
| 61,0 | 282,0 | 181,0 | 214,0 | 59,0  |
| 81,0 | 207,0 | 173,0 | 198,0 | 106,0 |
| 84,0 | 237,0 | 180,0 | 123,0 | 69,0  |
| 69,0 | 197,0 | 181,0 | 92,0  | 60,0  |
| 83,0 | 221,0 | 185,0 | 178,0 | 104,0 |
| 79,0 | 231,0 | 124,0 | 133,0 | 68,0  |
| NAN  | 258,0 | 174,0 | 146,0 | 54,0  |
| 71,0 | 244,0 | 149,0 | 183,0 | 39,0  |
| 60,0 | NAN   | 223,0 | NAN   | 80,0  |
| 69,0 | NAN   | 159,0 | NAN   | 51,0  |
| NAN  | 238,0 | 155,0 | 118,0 | 42,0  |
| 56,0 | 172,0 | 118,0 | 130,0 | 44,0  |
| 78,0 | 256,0 | 213,0 | 183,0 | 93,0  |
| 55,0 | NAN   | 151,0 | NAN   | 155,0 |
| NAN  | 324,0 | 203,0 | 202,0 | 87,0  |
| 74,0 | 338,0 | 239,0 | 240,0 | 65,0  |
| 71,0 | 295,0 | 212,0 | 159,0 | 114,0 |
| 85,0 | 259,0 | 191,0 | 170,0 | 79,0  |
| 79,0 | 281,0 | 184,0 | 103,0 | 109,0 |
| 78,0 | 227,0 | 132,0 | 290,0 | 64,0  |
| 58,0 | 247,0 | 181,0 | 140,0 | 74,0  |
| 79,0 | NAN   | 172,0 | NAN   | 201,0 |
| 82,0 | 248,0 | 132,0 | 110,0 | 38,0  |
| NAN  | NAN   | 161,0 | NAN   | 117,0 |
| NAN  | 229,0 | 115,0 | 214,0 | 41,0  |
| 70,0 | 230,0 | 187,0 | 150,0 | 38,0  |
| NAN  | 235,0 | 160,0 | 254,0 | 75,0  |
| 71,0 | 255,0 | 221,0 | 128,0 | 100,0 |
| 79,0 | 272,0 | 171,0 | 100,0 | 65,0  |
| 70,0 | 217,0 | 160,0 | 152,0 | 58,0  |
| 75,0 | 174,0 | 177,0 | 138,0 | 103,0 |
| 78,0 | 214,0 | 167,0 | 111,0 | 84,0  |
| NAN  | NAN   | 223,0 | NAN   | 80,0  |
| 70,0 | 246,0 | 181,0 | 163,0 | 55,0  |
| 69,0 | 323,0 | 192,0 | 211,0 | 95,0  |
| 63,0 | 312,0 | 170,0 | 241,0 | 81,0  |
| 80,0 | 212,0 | 152,0 | 139,0 | 87,0  |
| 63,0 | 252,0 | 198,0 | 182,0 | 122,0 |
| 65,0 | NAN   | 158,0 | NAN   | 62,0  |
| 66,0 | 304,0 | 203,0 | 178,0 | 54,0  |
| 70,0 | NAN   | 239,0 | NAN   | 130,0 |
| 86,0 | 282,0 | 183,0 | 294,0 | 219,0 |
| 58,0 | NAN   | 179,0 | NAN   | 65,0  |
| 80,0 | 179,0 | 142,0 | 50,0  | 30,0  |
| NAN  | 279,0 | 183,0 | 207,0 | 78,0  |
| 70,0 | 274,0 | 179,0 | 124,0 | 41,0  |
| 97,0 | 309,0 | 224,0 | 220,0 | 67,0  |
| NAN  | NAN   | 165,0 | NAN   | 76,0  |
| 51,0 | 348,0 | 169,0 | 186,0 | 45,0  |

|      |       |       |       |       |
|------|-------|-------|-------|-------|
| 61,0 | 245,0 | 160,0 | 128,0 | 47,0  |
| 56,0 | 254,0 | 181,0 | 161,0 | 204,0 |
| 82,0 | NAN   | 129,0 | NAN   | 54,0  |
| 64,0 | 168,0 | 111,0 | 117,0 | 41,0  |
| 78,0 | 148,0 | 148,0 | 115,0 | 111,0 |
| 66,0 | 223,0 | 168,0 | 118,0 | 56,0  |
| NAN  | 273,0 | 182,0 | 104,0 | 54,0  |
| 66,0 | 294,0 | 242,0 | 153,0 | 79,0  |
| NAN  | NAN   | 167,0 | NAN   | 199,0 |
| NAN  | 208,0 | 165,0 | 197,0 | 69,0  |
| NAN  | 254,0 | 159,0 | 86,0  | 70,0  |
| 79,0 | 222,0 | 176,0 | 128,0 | 93,0  |
| 73,0 | 280,0 | 200,0 | 115,0 | 66,0  |
| 74,0 | 253,0 | 168,0 | 109,0 | 56,0  |
| 66,0 | 266,0 | 171,0 | 167,0 | 98,0  |
| 68,0 | 249,0 | 188,0 | 154,0 | 74,0  |
| 70,0 | 239,0 | 143,0 | 134,0 | 38,0  |
| NAN  | NAN   | 164,0 | NAN   | 62,0  |
| NAN  | NAN   | 135,0 | NAN   | 71,0  |
| NAN  | NAN   | 163,0 | NAN   | 47,0  |
| 59,0 | 263,0 | 188,0 | 121,0 | 60,0  |
| 76,0 | NAN   | 166,0 | NAN   | 44,0  |
| NAN  | 276,0 | 181,0 | 227,0 | 104,0 |
| 64,0 | 219,0 | 145,0 | 166,0 | 78,0  |
| 75,0 | 249,0 | 214,0 | 249,0 | 228,0 |
| 64,0 | 214,0 | 166,0 | 170,0 | 76,0  |
| 67,0 | 175,0 | 174,0 | 100,0 | 57,0  |
| NAN  | 212,0 | 189,0 | 144,0 | 61,0  |
| 65,0 | 143,0 | 103,0 | 117,0 | 110,0 |
| 72,0 | 267,0 | 201,0 | 154,0 | 53,0  |
| 78,0 | 208,0 | 181,0 | 241,0 | 112,0 |
| NAN  | 249,0 | 225,0 | 145,0 | 79,0  |
| 76,0 | 184,0 | 162,0 | 125,0 | 54,0  |
| NAN  | 252,0 | 182,0 | 76,0  | 47,0  |
| NAN  | NAN   | 186,0 | NAN   | 271,0 |
| NAN  | 220,0 | 163,0 | 202,0 | 65,0  |
| 82,0 | 206,0 | 203,0 | 180,0 | 103,0 |
| NAN  | 305,0 | 189,0 | 163,0 | 65,0  |
| 84,0 | 225,0 | 200,0 | 116,0 | 58,0  |
| NAN  | 208,0 | 122,0 | 147,0 | 52,0  |
| NAN  | 243,0 | 154,0 | 138,0 | 77,0  |
| 93,0 | NAN   | 304,0 | NAN   | 359,0 |
| 81,0 | 181,0 | 121,0 | 92,0  | 45,0  |
| NAN  | NAN   | 164,0 | NAN   | 63,0  |
| 82,0 | 251,0 | 211,0 | 147,0 | 79,0  |
| 68,0 | 340,0 | 182,0 | 122,0 | 77,0  |
| 62,0 | 254,0 | 174,0 | 95,0  | 39,0  |
| 61,0 | 327,0 | 205,0 | 181,0 | 80,0  |
| 66,0 | NAN   | 195,0 | NAN   | 34,0  |
| 74,0 | 250,0 | 202,0 | 222,0 | 72,0  |

|      |       |       |       |       |
|------|-------|-------|-------|-------|
| NAN  | 263,0 | 191,0 | 141,0 | 51,0  |
| 64,0 | NAN   | 153,0 | NAN   | 50,0  |
| 83,0 | NAN   | 176,0 | NAN   | 68,0  |
| 75,0 | NAN   | 204,0 | NAN   | 66,0  |
| 68,0 | 250,0 | 172,0 | 161,0 | 73,0  |
| 64,0 | 314,0 | 172,0 | 202,0 | 59,0  |
| 76,0 | 305,0 | 208,0 | 176,0 | 74,0  |
| 72,0 | 229,0 | 130,0 | 110,0 | 40,0  |
| 70,0 | 250,0 | 116,0 | 154,0 | 34,0  |
| 64,0 | 294,0 | 230,0 | 97,0  | 57,0  |
| NAN  | 188,0 | 119,0 | 116,0 | 64,0  |
| 75,0 | 288,0 | 171,0 | 195,0 | 50,0  |
| 76,0 | 336,0 | 186,0 | 127,0 | 51,0  |
| 74,0 | 312,0 | 245,0 | 170,0 | 51,0  |
| 83,0 | NAN   | 220,0 | NAN   | 60,0  |
| NAN  | NAN   | 142,0 | NAN   | 59,0  |
| 80,0 | 325,0 | 202,0 | 238,0 | 102,0 |
| 67,0 | 244,0 | 183,0 | 224,0 | 99,0  |
| 79,0 | 323,0 | 215,0 | 241,0 | 102,0 |
| 68,0 | 283,0 | 196,0 | 226,0 | 64,0  |
| 76,0 | 234,0 | 160,0 | 198,0 | 95,0  |
| 80,0 | 315,0 | 175,0 | 165,0 | 53,0  |
| NAN  | 223,0 | 172,0 | 193,0 | 154,0 |
| 63,0 | 323,0 | 222,0 | 234,0 | 76,0  |
| NAN  | 268,0 | 208,0 | 193,0 | 92,0  |
| 77,0 | 247,0 | 173,0 | 118,0 | 42,0  |
| 55,0 | 243,0 | 146,0 | 99,0  | 60,0  |
| 83,0 | NAN   | 185,0 | NAN   | 69,0  |
| 84,0 | 260,0 | 194,0 | 208,0 | 84,0  |
| NAN  | 270,0 | 200,0 | 179,0 | 43,0  |
| NAN  | 226,0 | 170,0 | 165,0 | 70,0  |
| 68,0 | 225,0 | 162,0 | 168,0 | 60,0  |
| 64,0 | 264,0 | 200,0 | 162,0 | 60,0  |
| 63,0 | 257,0 | 159,0 | 103,0 | 56,0  |
| 79,0 | 220,0 | 209,0 | 200,0 | 114,0 |
| 67,0 | 199,0 | 128,0 | 184,0 | 102,0 |
| 62,0 | 267,0 | 176,0 | 241,0 | 68,0  |
| NAN  | 198,0 | 146,0 | 155,0 | 52,0  |
| 65,0 | 226,0 | 163,0 | 191,0 | 55,0  |
| NAN  | 253,0 | 208,0 | 287,0 | 68,0  |
| NAN  | 269,0 | 193,0 | 119,0 | 52,0  |
| 75,0 | 216,0 | 153,0 | 119,0 | 54,0  |
| NAN  | NAN   | 140,0 | NAN   | 49,0  |
| 77,0 | 267,0 | 192,0 | 131,0 | 55,0  |
| 61,0 | 250,0 | 143,0 | 97,0  | 51,0  |
| 62,0 | NAN   | 204,0 | NAN   | 51,0  |
| NAN  | 239,0 | 205,0 | 132,0 | 82,0  |
| 79,0 | 279,0 | 184,0 | 135,0 | 57,0  |
| 66,0 | 232,0 | 168,0 | 122,0 | 57,0  |
| NAN  | 295,0 | 200,0 | 141,0 | 48,0  |



|      |       |       |       |       |
|------|-------|-------|-------|-------|
| 77,0 | 263,0 | 193,0 | 179,0 | 125,0 |
| 83,0 | 200,0 | 154,0 | 207,0 | 58,0  |
| 59,0 | NAN   | 185,0 | NAN   | 77,0  |
| 62,0 | 242,0 | 179,0 | 109,0 | 54,0  |
| 70,0 | 257,0 | 219,0 | 150,0 | 62,0  |
| 76,0 | 297,0 | 169,0 | 155,0 | 52,0  |
| 62,0 | 230,0 | 148,0 | 243,0 | 56,0  |
| 75,0 | 241,0 | 204,0 | 117,0 | 87,0  |
| 70,0 | 222,0 | 178,0 | 228,0 | 84,0  |
| 59,0 | 302,0 | 180,0 | 161,0 | 93,0  |
| NAN  | 244,0 | 169,0 | 112,0 | 49,0  |
| 72,0 | 267,0 | 152,0 | 92,0  | 42,0  |
| 74,0 | NAN   | 184,0 | NAN   | 47,0  |
| NAN  | 245,0 | 186,0 | 197,0 | 107,0 |
| 81,0 | 263,0 | 234,0 | 101,0 | 64,0  |
| NAN  | 289,0 | 185,0 | 155,0 | 62,0  |
| 74,0 | 264,0 | 189,0 | 206,0 | 79,0  |
| NAN  | 307,0 | 183,0 | 140,0 | 50,0  |
| NAN  | 190,0 | 168,0 | 114,0 | 54,0  |
| 79,0 | NAN   | 133,0 | NAN   | 71,0  |
| 65,0 | 251,0 | 201,0 | 175,0 | 81,0  |
| 58,0 | NAN   | 166,0 | NAN   | 75,0  |
| 78,0 | 299,0 | 229,0 | 222,0 | 138,0 |
| 78,0 | 260,0 | 161,0 | 123,0 | 54,0  |
| NAN  | 207,0 | 129,0 | 144,0 | 59,0  |
| 63,0 | 248,0 | 175,0 | 161,0 | 106,0 |
| 74,0 | NAN   | 175,0 | NAN   | 62,0  |
| 73,0 | 271,0 | 182,0 | 170,0 | 84,0  |
| 81,0 | 244,0 | 163,0 | 113,0 | 45,0  |
| NAN  | 301,0 | 196,0 | 130,0 | 87,0  |
| 81,0 | 210,0 | 169,0 | 159,0 | 69,0  |
| 67,0 | NAN   | 152,0 | NAN   | 48,0  |
| 71,0 | 245,0 | 155,0 | 135,0 | 60,0  |
| 68,0 | NAN   | 214,0 | NAN   | 58,0  |
| 67,0 | NAN   | 177,0 | NAN   | 39,0  |
| 73,0 | 272,0 | 173,0 | 243,0 | 63,0  |
| 79,0 | 231,0 | 170,0 | 138,0 | 54,0  |
| 59,0 | 261,0 | 140,0 | 171,0 | 48,0  |
| 60,0 | 278,0 | 173,0 | 150,0 | 83,0  |
| 86,0 | 338,0 | 177,0 | 221,0 | 93,0  |
| 77,0 | 338,0 | 199,0 | 229,0 | 77,0  |
| 60,0 | 222,0 | 189,0 | 200,0 | 99,0  |
| 58,0 | 276,0 | 182,0 | 162,0 | 71,0  |
| 69,0 | 224,0 | 180,0 | 176,0 | 55,0  |
| 73,0 | 247,0 | 148,0 | 153,0 | 49,0  |
| NAN  | NAN   | 170,0 | NAN   | 63,0  |
| 63,0 | 195,0 | 162,0 | 50,0  | 40,0  |
| NAN  | 289,0 | 241,0 | 270,0 | 372,0 |
| NAN  | 249,0 | 158,0 | 107,0 | 43,0  |
| 71,0 | 241,0 | 181,0 | 239,0 | 117,0 |

|      |       |       |       |       |
|------|-------|-------|-------|-------|
| 71,0 | NAN   | 232,0 | NAN   | 111,0 |
| 65,0 | 254,0 | 182,0 | 140,0 | 72,0  |
| NAN  | 230,0 | 196,0 | 161,0 | 63,0  |
| NAN  | NAN   | 199,0 | NAN   | 145,0 |
| 67,0 | 280,0 | 181,0 | 175,0 | 91,0  |
| 65,0 | 235,0 | 160,0 | 102,0 | 42,0  |
| 74,0 | 180,0 | 146,0 | 136,0 | 44,0  |
| 67,0 | 231,0 | 136,0 | 181,0 | 89,0  |
| 77,0 | 188,0 | 136,0 | 67,0  | 40,0  |
| 83,0 | 231,0 | 184,0 | 173,0 | 82,0  |
| 68,0 | NAN   | 183,0 | NAN   | 56,0  |
| 69,0 | NAN   | 208,0 | NAN   | 62,0  |
| 58,0 | 266,0 | 209,0 | 145,0 | 67,0  |
| 60,0 | 250,0 | 233,0 | 150,0 | 99,0  |
| 85,0 | NAN   | 215,0 | NAN   | 121,0 |
| 80,0 | 315,0 | 247,0 | 257,0 | 195,0 |
| NAN  | 250,0 | 149,0 | 147,0 | 37,0  |
| 70,0 | 339,0 | 225,0 | 154,0 | 77,0  |
| NAN  | 236,0 | 195,0 | 89,0  | 53,0  |
| 58,0 | NAN   | 185,0 | NAN   | 54,0  |
| 59,0 | NAN   | 114,0 | NAN   | 58,0  |
| 73,0 | 246,0 | 173,0 | 119,0 | 71,0  |
| 68,0 | 318,0 | 170,0 | 165,0 | 48,0  |
| 74,0 | NAN   | 195,0 | NAN   | 68,0  |
| NAN  | 216,0 | 210,0 | 94,0  | 67,0  |
| NAN  | 232,0 | 170,0 | 185,0 | 68,0  |
| 83,0 | 236,0 | 176,0 | 142,0 | 78,0  |
| 58,0 | 317,0 | 223,0 | 247,0 | 86,0  |
| 54,0 | NAN   | 171,0 | NAN   | 67,0  |
| 56,0 | 368,0 | 200,0 | 211,0 | 78,0  |
| 89,0 | 258,0 | 200,0 | 143,0 | 85,0  |
| NAN  | 309,0 | 237,0 | 149,0 | 151,0 |
| 61,0 | NAN   | 167,0 | NAN   | 36,0  |
| 75,0 | 260,0 | 192,0 | 140,0 | 75,0  |
| NAN  | 217,0 | 173,0 | 218,0 | 111,0 |
| NAN  | 305,0 | 182,0 | 147,0 | 53,0  |
| NAN  | NAN   | 203,0 | NAN   | 62,0  |
| 72,0 | 231,0 | 149,0 | 213,0 | 68,0  |
| 60,0 | 307,0 | 180,0 | 185,0 | 64,0  |
| NAN  | 269,0 | 194,0 | 94,0  | 49,0  |
| 74,0 | 247,0 | 162,0 | 211,0 | 86,0  |
| 75,0 | NAN   | 160,0 | NAN   | 69,0  |
| NAN  | 202,0 | 138,0 | 138,0 | 58,0  |
| 64,0 | 346,0 | 163,0 | 208,0 | 54,0  |
| NAN  | NAN   | 183,0 | NAN   | 48,0  |
| NAN  | 240,0 | 177,0 | 92,0  | 51,0  |
| 78,0 | 244,0 | 164,0 | 93,0  | 79,0  |
| NAN  | 367,0 | 184,0 | 232,0 | 71,0  |
| 73,0 | 286,0 | 178,0 | 183,0 | 60,0  |
| NAN  | 174,0 | 157,0 | 167,0 | 94,0  |

|       |       |       |       |       |
|-------|-------|-------|-------|-------|
| 77,0  | 243,0 | 143,0 | 242,0 | 61,0  |
| 78,0  | 220,0 | 195,0 | 220,0 | 195,0 |
| 85,0  | 318,0 | 214,0 | 205,0 | 90,0  |
| 62,0  | 201,0 | 141,0 | 137,0 | 71,0  |
| NAN   | NAN   | 241,0 | NAN   | 67,0  |
| NAN   | 279,0 | 209,0 | 166,0 | 84,0  |
| 83,0  | 175,0 | 136,0 | 112,0 | 69,0  |
| 63,0  | 278,0 | 131,0 | 121,0 | 38,0  |
| 67,0  | 355,0 | 238,0 | 222,0 | 70,0  |
| 111,0 | 236,0 | 214,0 | 454,0 | 383,0 |
| NAN   | NAN   | 162,0 | NAN   | 188,0 |
| 68,0  | 230,0 | 162,0 | 117,0 | 41,0  |
| NAN   | 219,0 | 117,0 | 164,0 | 97,0  |
| NAN   | 250,0 | 178,0 | 106,0 | 43,0  |
| 77,0  | 208,0 | 122,0 | 130,0 | 40,0  |
| NAN   | 192,0 | 155,0 | 155,0 | 87,0  |

| HbA1c-IFCC % 24 gw | HbA1c-IFCC % 2 Yrs PD | TSH mcUI/mL 24 gw | FT4 (ng/dl) 24 gw | TSH mcUI/mL 2 Yrs PD |
|--------------------|-----------------------|-------------------|-------------------|----------------------|
| 5,1                | 5,2                   | 3,20              | 9,02              | 2,43                 |
| 4,9                | 5,3                   | NAN               | NAN               | 2,57                 |
| 5,3                | 5,4                   | 2,08              | 6,47              | 1,63                 |
| 5,6                | 5,4                   | NAN               | NAN               | 2,93                 |
| 4,7                | 5,3                   | 1,70              | 6,78              | 1,56                 |
| 5,0                | 5,3                   | 2,97              | 8,30              | 3,24                 |
| 5,2                | 5,5                   | 2,52              | 6,22              | 1,84                 |
| 4,9                | 5,5                   | NAN               | NAN               | 2,78                 |
| 5,1                | NAN                   | NAN               | NAN               | 1,28                 |
| 5,1                | 6,0                   | 3,71              | 6,71              | 2,99                 |
| 4,6                | 5,1                   | NAN               | NAN               | 1,50                 |
| 5,2                | 5,5                   | 0,83              | 6,59              | 0,81                 |
| 5,2                | 5,6                   | 1,00              | 6,57              | 1,13                 |
| 5,1                | 5,4                   | 0,88              | 5,37              | NAN                  |
| 5,0                | 5,3                   | 1,68              | 6,72              | 1,36                 |
| 4,7                | 5,5                   | 1,29              | 8,87              | 1,10                 |
| 4,8                | 5,2                   | 1,34              | 7,17              | 1,19                 |
| 4,5                | 4,7                   | 0,66              | 6,78              | 0,18                 |
| 5,4                | 5,5                   | 1,13              | 8,80              | 2,87                 |
| 5,7                | 5,8                   | 1,06              | 6,71              | 2,84                 |
| 4,6                | 4,9                   | 2,71              | 7,56              | 0,85                 |
| 5,4                | 5,6                   | 3,05              | 5,49              | 4,65                 |
| 5,4                | NAN                   | 1,45              | 5,92              | 4,40                 |
| 4,7                | 5,2                   | 2,55              | 6,36              | 0,79                 |
| 5,1                | 5,3                   | 3,36              | 5,75              | 2,81                 |
| 4,9                | 4,7                   | 5,32              | 7,24              | 4,87                 |
| 5,2                | 5,1                   | 3,15              | 5,21              | 3,96                 |
| 5,0                | 5,5                   | 3,36              | 6,17              | 2,28                 |
| 5,1                | 5,3                   | 3,66              | 6,31              | 1,11                 |
| 5,3                | 5,2                   | NAN               | NAN               | 0,57                 |
| 5,0                | 5,1                   | NAN               | NAN               | 1,00                 |
| 5,0                | 5,4                   | NAN               | NAN               | 0,93                 |
| 5,7                | 5,8                   | 2,65              | 4,33              | 2,95                 |
| 4,7                | 5,1                   | 3,18              | 7,97              | 2,68                 |
| 4,8                | 4,9                   | 0,61              | 6,45              | 0,52                 |
| 4,8                | 5,4                   | NAN               | NAN               | 1,13                 |
| 4,9                | 5,4                   | NAN               | NAN               | 0,58                 |
| 5,1                | 5,5                   | 2,57              | 9,16              | 2,31                 |
| 5,2                | 5,4                   | 1,36              | 5,99              | 1,11                 |
| 5,0                | 5,3                   | 0,88              | 6,92              | 1,07                 |
| 4,7                | 5,0                   | 1,61              | 7,55              | 1,28                 |
| 5,4                | 5,7                   | 1,97              | 6,90              | 1,65                 |
| 4,7                | 5,1                   | 0,47              | 7,37              | 1,79                 |
| 5,1                | 5,3                   | 3,70              | 6,86              | 1,94                 |
| 5,3                | 5,5                   | 1,80              | 6,78              | 1,81                 |
| 4,7                | 5,0                   | 1,78              | 8,57              | 1,05                 |
| 5,4                | 4,9                   | 2,16              | 7,38              | 1,82                 |

|     |     |      |      |      |
|-----|-----|------|------|------|
| 5,1 | 5,8 | 1,13 | 7,49 | 4,98 |
| 4,7 | 5,1 | 1,52 | 8,33 | 1,81 |
| 5,1 | 5,5 | 1,45 | 6,87 | 1,11 |
| 5,4 | 5,5 | 1,97 | 7,44 | 2,38 |
| 5,0 | 5,2 | 0,18 | 9,36 | 0,87 |
| 5,3 | 5,5 | 2,44 | 6,02 | 0,99 |
| 5,7 | 5,3 | 0,62 | 6,48 | 0,81 |
| 5,3 | 5,1 | 0,77 | 8,18 | NAN  |
| 5,1 | 5,2 | 3,96 | 5,98 | 2,29 |
| 5,0 | NAN | 1,79 | 5,65 | 3,81 |
| 5,5 | 5,5 | NAN  | NAN  | 1,85 |
| 4,9 | 5,2 | 1,06 | 7,14 | 1,11 |
| 4,9 | 5,4 | 1,71 | 7,73 | 1,55 |
| 5,3 | 5,1 | 1,79 | 7,73 | 2,30 |
| 5,0 | 5,5 | NAN  | NAN  | 0,81 |
| 5,1 | 5,1 | 2,10 | 7,43 | 1,56 |
| 4,8 | 5,3 | 3,28 | 6,47 | 2,38 |
| 5,1 | 5,4 | 1,37 | 8,19 | 1,33 |
| 4,6 | 4,9 | 0,54 | 8,00 | 4,34 |
| 4,9 | 4,7 | 1,61 | 6,85 | 2,38 |
| 4,8 | 5,1 | 2,18 | 6,40 | 1,14 |
| 5,4 | 5,4 | 2,22 | 7,41 | 4,19 |
| 5,8 | 5,9 | NAN  | NAN  | 1,78 |
| NAN | 5,5 | 0,95 | 6,84 | 1,26 |
| 4,2 | 5,1 | 0,70 | 7,09 | 2,86 |
| 4,9 | 5,4 | 3,14 | 6,95 | 4,77 |
| 4,8 | 5,1 | 1,47 | 6,45 | 0,70 |
| 5,2 | 5,3 | NAN  | NAN  | 4,00 |
| 5,0 | 5,6 | 2,44 | 8,58 | 1,76 |
| 5,2 | 5,6 | 1,03 | 7,20 | 0,64 |
| 4,9 | 5,3 | 1,36 | 6,78 | 0,92 |
| 5,1 | 5,5 | 3,32 | 5,82 | 2,62 |
| 5,3 | 5,6 | 2,22 | 7,00 | 1,06 |
| 5,2 | 5,3 | NAN  | NAN  | 2,40 |
| 5,0 | 5,4 | 2,15 | 7,86 | 3,29 |
| 4,9 | 5,2 | 2,50 | 6,99 | 1,70 |
| 4,5 | 4,9 | 2,66 | 5,39 | 2,39 |
| 5,4 | 6,0 | 2,21 | 6,07 | 1,69 |
| 5,0 | 5,5 | 0,15 | 7,74 | 3,16 |
| 4,9 | 5,1 | NAN  | NAN  | 2,36 |
| 5,3 | 5,6 | 2,24 | 7,85 | 1,81 |
| 5,1 | 5,6 | NAN  | NAN  | 2,68 |
| 5,2 | 5,7 | 0,55 | 7,66 | 0,77 |
| 5,3 | 4,5 | NAN  | NAN  | 1,54 |
| 5,1 | 5,3 | 4,35 | 7,80 | 2,21 |
| 5,3 | 5,0 | 1,75 | 6,11 | 1,98 |
| 4,6 | 5,2 | NAN  | NAN  | 0,90 |
| 5,2 | 5,7 | 2,39 | 6,86 | 2,05 |
| 4,9 | 5,2 | NAN  | NAN  | 0,68 |
| 5,0 | 5,5 | 2,54 | 6,58 | 3,12 |

|     |     |      |       |      |
|-----|-----|------|-------|------|
| 4,8 | NAN | 3,05 | 7,17  | 1,33 |
| 5,0 | 5,4 | 1,71 | 8,18  | 1,27 |
| 5,2 | 5,3 | NAN  | NAN   | 0,94 |
| 4,3 | 4,6 | 1,53 | 8,36  | 1,39 |
| 4,9 | 5,0 | 0,23 | 11,63 | 1,81 |
| 4,9 | 5,2 | 2,01 | 6,39  | 1,88 |
| 5,0 | 5,2 | 2,59 | 6,30  | 2,84 |
| 4,9 | 5,3 | 1,73 | 7,87  | 1,46 |
| 5,4 | 5,6 | NAN  | NAN   | 2,37 |
| 5,1 | 5,3 | 0,78 | 7,98  | 1,33 |
| 5,3 | 5,5 | 1,70 | 6,63  | 1,09 |
| 5,2 | 5,3 | NAN  | NAN   | 3,10 |
| 4,9 | 5,1 | 2,52 | 7,12  | 1,93 |
| 4,8 | 5,3 | 1,51 | 8,34  | 5,60 |
| 5,1 | 5,5 | 1,56 | 7,03  | 1,73 |
| 5,1 | 5,4 | 0,21 | 7,98  | 2,88 |
| 5,3 | 5,5 | NAN  | NAN   | 0,71 |
| 5,1 | 5,3 | NAN  | NAN   | 0,95 |
| 5,3 | 5,4 | NAN  | NAN   | 0,60 |
| 4,8 | 5,0 | NAN  | NAN   | 2,71 |
| 5,0 | 5,5 | 1,21 | 7,52  | 1,56 |
| 5,0 | 5,3 | NAN  | NAN   | 1,03 |
| 4,9 | 5,5 | 2,07 | 6,23  | 1,76 |
| 4,6 | 5,1 | 2,38 | 7,37  | 1,32 |
| 5,4 | 5,4 | 2,84 | 5,88  | 1,29 |
| 5,0 | 5,2 | 2,64 | 7,96  | 0,97 |
| 4,9 | 5,5 | 2,69 | 8,35  | 2,03 |
| 5,1 | 5,3 | 1,25 | 7,04  | 1,91 |
| 5,4 | 6,0 | 2,40 | 5,25  | 3,77 |
| 4,8 | 5,2 | 2,64 | 6,88  | 2,19 |
| 5,7 | 5,2 | 3,20 | 7,57  | 1,56 |
| 5,8 | 6,2 | 1,97 | 6,19  | 2,31 |
| 4,8 | 5,4 | 2,41 | 7,35  | 1,93 |
| 5,0 | 5,2 | 3,20 | 8,51  | 2,93 |
| 5,5 | 5,9 | NAN  | NAN   | 3,72 |
| 4,8 | 5,3 | 1,92 | 7,64  | 1,62 |
| 5,3 | 5,4 | 0,03 | 9,12  | 2,61 |
| 5,1 | 5,4 | 3,75 | 6,64  | 5,71 |
| 4,8 | 5,2 | 2,54 | 7,60  | 1,01 |
| 4,8 | 5,2 | 1,64 | 5,27  | 2,14 |
| 5,0 | 5,3 | 2,63 | 7,40  | 2,02 |
| 5,6 | 5,8 | NAN  | NAN   | 2,75 |
| 5,3 | 5,3 | 0,20 | 10,39 | 1,95 |
| 5,1 | 5,2 | NAN  | NAN   | 3,77 |
| 5,2 | 5,1 | 3,18 | 6,35  | NAN  |
| 5,3 | 5,3 | 3,43 | 6,19  | 2,10 |
| 5,3 | 5,4 | 2,89 | 8,10  | 3,30 |
| 4,8 | 5,5 | 3,59 | 7,30  | 1,62 |
| 4,8 | 5,0 | NAN  | NAN   | 1,53 |
| 5,3 | 5,5 | NAN  | NAN   | 3,16 |

|     |     |      |       |      |
|-----|-----|------|-------|------|
| 5,4 | 5,2 | 0,39 | 7,41  | 0,55 |
| 5,5 | 5,3 | NAN  | NAN   | 1,72 |
| 5,2 | 5,7 | NAN  | NAN   | 1,20 |
| 5,1 | 5,2 | NAN  | NAN   | 1,82 |
| 5,4 | 5,8 | 1,84 | 6,32  | 1,29 |
| 4,6 | 4,7 | 0,10 | 8,71  | 0,43 |
| 4,6 | 5,1 | NAN  | 7,17  | 3,13 |
| 5,2 | 5,5 | NAN  | NAN   | 1,99 |
| 5,2 | 5,4 | 1,81 | 5,93  | 0,93 |
| 5,0 | 5,5 | 1,96 | 7,17  | 5,45 |
| 4,8 | 5,3 | 0,73 | 9,15  | 3,15 |
| 4,2 | 4,6 | 3,22 | 6,67  | 2,33 |
| 5,3 | 5,6 | 3,44 | 6,40  | 2,21 |
| 5,0 | 5,0 | 2,20 | 5,44  | 2,10 |
| 4,4 | 5,2 | NAN  | NAN   | 2,30 |
| 5,3 | 5,6 | NAN  | NAN   | 2,91 |
| 5,2 | 5,4 | 1,08 | 6,10  | 1,18 |
| 4,8 | 5,1 | 2,86 | 5,10  | 2,47 |
| NAN | 5,4 | 3,19 | NAN   | 1,59 |
| 4,4 | 5,1 | 3,35 | 6,74  | 4,04 |
| 4,9 | 5,4 | 0,22 | 10,04 | 3,62 |
| 5,5 | 5,5 | 0,70 | 7,07  | 1,11 |
| 4,9 | 5,2 | 0,84 | 7,28  | 1,15 |
| 5,8 | 6,0 | 2,35 | 6,27  | 1,37 |
| 5,4 | 5,6 | NAN  | NAN   | 1,78 |
| 5,1 | 5,9 | 2,46 | 7,19  | 1,53 |
| NAN | 5,8 | 3,49 | 7,66  | 1,21 |
| 4,9 | 5,4 | NAN  | NAN   | 2,19 |
| 5,1 | 5,6 | NAN  | NAN   | 0,76 |
| 5,2 | 5,7 | 2,90 | 5,52  | 1,09 |
| 4,6 | NAN | 1,67 | 8,62  | 1,97 |
| 5,4 | 5,4 | 1,35 | 7,66  | 0,44 |
| 5,1 | 5,5 | 2,68 | 8,05  | 1,99 |
| 4,6 | 5,1 | NAN  | NAN   | 1,36 |
| 5,1 | 5,2 | 1,67 | 7,60  | 1,09 |
| 4,7 | 5,4 | 1,84 | 6,71  | 1,60 |
| 4,6 | 4,9 | 2,05 | 5,91  | 1,69 |
| 4,9 | 5,1 | 2,64 | 6,69  | 1,52 |
| 4,8 | 5,1 | 2,42 | 6,58  | 1,66 |
| 5,1 | 5,2 | 1,73 | 7,37  | 1,72 |
| 5,1 | 5,5 | 2,49 | 7,26  | 2,15 |
| 4,8 | 5,2 | 2,73 | 6,66  | 2,82 |
| 5,7 | 5,8 | NAN  | NAN   | 0,97 |
| 5,4 | 5,8 | 1,47 | 7,97  | 1,62 |
| 4,7 | 4,8 | 1,39 | 6,38  | 1,36 |
| 4,9 | 5,4 | NAN  | NAN   | 1,66 |
| 4,7 | 5,0 | 1,50 | 6,99  | 0,65 |
| 5,0 | 5,6 | 1,06 | 6,02  | 1,20 |
| 5,2 | 5,6 | 3,86 | 7,16  | 1,25 |
| 5,1 | 5,5 | 1,47 | 8,80  | 1,40 |

|     |     |      |      |      |
|-----|-----|------|------|------|
| 5,0 | 5,6 | NAN  | NAN  | 1,69 |
| 5,4 | 5,5 | 1,79 | 6,22 | 2,05 |
| 5,1 | 5,7 | NAN  | NAN  | 0,83 |
| 5,1 | 5,5 | 0,60 | 8,05 | 2,48 |
| 5,0 | 5,5 | 2,18 | 6,03 | 1,80 |
| 5,0 | 5,5 | 1,30 | 6,06 | 0,21 |
| 4,7 | 5,2 | NAN  | NAN  | 2,33 |
| 5,0 | 5,8 | 1,06 | 7,27 | 1,06 |
| 5,0 | 5,1 | 1,11 | 5,65 | 1,98 |
| 4,9 | 5,5 | 0,87 | 7,27 | 2,16 |
| 4,9 | 5,2 | 1,17 | 7,68 | 2,53 |
| 5,1 | 5,6 | 2,40 | 7,46 | 0,81 |
| 4,4 | 5,4 | 2,69 | 7,26 | 1,37 |
| 4,9 | 5,1 | 1,71 | 6,56 | 1,02 |
| 4,3 | 5,2 | 2,72 | 6,73 | NAN  |
| 4,4 | 5,0 | NAN  | NAN  | 3,75 |
| 5,4 | 5,3 | 2,85 | 5,65 | 1,19 |
| 4,7 | 5,1 | 2,19 | 6,15 | 1,20 |
| 5,0 | 5,4 | NAN  | NAN  | 1,70 |
| 5,3 | 5,5 | NAN  | NAN  | 2,66 |
| NAN | 5,4 | 2,61 | 6,49 | 1,63 |
| 4,9 | 5,5 | NAN  | NAN  | 1,35 |
| 4,8 | 5,0 | 2,04 | 7,27 | 3,70 |
| 4,4 | NAN | 2,69 | 7,06 | 1,38 |
| 5,0 | 5,7 | 2,01 | 6,87 | 1,05 |
| 5,0 | 5,7 | 1,90 | 6,33 | 1,88 |
| 5,0 | 5,5 | NAN  | NAN  | 1,68 |
| 4,4 | 5,0 | 2,54 | 6,70 | 1,61 |
| 4,8 | 5,3 | 2,35 | 6,43 | 1,85 |
| 5,0 | 5,2 | 2,13 | 7,63 | 1,30 |
| 5,2 | 5,5 | 0,36 | 6,59 | 0,58 |
| 4,6 | 5,3 | 2,43 | 7,63 | 0,75 |
| 5,1 | 5,5 | 2,03 | 6,57 | 1,11 |
| 5,2 | 5,7 | NAN  | NAN  | 1,42 |
| 4,9 | 4,6 | NAN  | NAN  | 1,33 |
| 5,1 | 5,7 | 2,06 | 8,01 | 1,56 |
| 4,4 | 5,0 | 1,45 | 8,58 | 1,15 |
| 5,2 | 5,4 | 1,73 | 6,89 | 1,39 |
| 4,9 | 5,4 | 2,04 | 6,27 | 1,58 |
| 4,9 | 5,3 | 2,88 | 6,24 | 2,69 |
| 5,0 | 5,2 | NAN  | NAN  | 2,34 |
| 5,2 | 5,3 | 2,92 | 6,49 | 1,30 |
| 5,1 | 5,7 | 4,43 | 5,99 | 2,32 |
| 5,3 | 5,3 | 2,54 | 6,24 | 2,15 |
| 5,1 | 5,8 | NAN  | NAN  | 1,24 |
| 4,9 | 5,0 | NAN  | NAN  | 4,08 |
| 5,0 | 5,2 | NAN  | NAN  | 1,93 |
| 4,8 | 5,4 | 0,46 | 7,57 | 2,77 |
| 5,0 | 5,5 | 0,04 | 9,69 | 3,98 |
| 5,7 | 5,8 | 2,31 | 6,95 | 1,42 |



|     |     |      |       |      |
|-----|-----|------|-------|------|
| 4,9 | 5,4 | NAN  | NAN   | 2,44 |
| 4,1 | 4,0 | NAN  | NAN   | 1,81 |
| 5,3 | 6,2 | NAN  | NAN   | 2,87 |
| 4,5 | 5,1 | NAN  | NAN   | 2,98 |
| 4,9 | 5,2 | NAN  | NAN   | 1,36 |
| 4,8 | 5,1 | 2,12 | 6,95  | 1,18 |
| 4,3 | 4,9 | 1,32 | 6,22  | 0,74 |
| 5,1 | 5,4 | 1,70 | 8,36  | 0,55 |
| 4,9 | 5,4 | 1,52 | 7,73  | 1,68 |
| NAN | 5,4 | 0,46 | 8,65  | 0,31 |
| 4,7 | 5,2 | NAN  | NAN   | 3,83 |
| 5,1 | 5,5 | NAN  | NAN   | 2,72 |
| 4,9 | 5,4 | 1,68 | 7,15  | 1,80 |
| 5,2 | 5,6 | 2,70 | 7,42  | 3,16 |
| NAN | 5,5 | NAN  | NAN   | 0,67 |
| 4,9 | 5,2 | 3,67 | 5,20  | 2,77 |
| 5,0 | 5,6 | 1,93 | 5,80  | 1,85 |
| 5,2 | 5,8 | NAN  | NAN   | 3,42 |
| 4,8 | 5,3 | 2,01 | 6,94  | 2,04 |
| 4,7 | 5,2 | NAN  | NAN   | 2,33 |
| 5,1 | 5,4 | NAN  | NAN   | 2,27 |
| 4,5 | 4,9 | 1,21 | 7,37  | 1,25 |
| 4,9 | 5,4 | 4,49 | 6,26  | 2,38 |
| 4,9 | 5,4 | NAN  | NAN   | 2,43 |
| 5,0 | 5,5 | 1,83 | 6,09  | 2,05 |
| 4,1 | 5,1 | 2,07 | 6,31  | 1,36 |
| 5,0 | 5,6 | 1,88 | 7,71  | 2,34 |
| 5,0 | 5,4 | 2,43 | 6,44  | 0,78 |
| 4,4 | 5,2 | NAN  | NAN   | 1,06 |
| 5,2 | 5,5 | 1,76 | 5,81  | 1,89 |
| 4,8 | 5,2 | 2,17 | 7,06  | 2,32 |
| 5,2 | 5,9 | 1,84 | 7,69  | 2,87 |
| 4,9 | 5,4 | NAN  | NAN   | 0,69 |
| 4,8 | 5,1 | 1,21 | 10,81 | 2,31 |
| 4,7 | 5,2 | 2,40 | 6,74  | 3,00 |
| 4,7 | 5,0 | 2,20 | 5,43  | 1,67 |
| 5,1 | 5,1 | NAN  | NAN   | 1,28 |
| 5,0 | 5,6 | 1,44 | 7,89  | 2,02 |
| 4,4 | 4,7 | 0,56 | 10,99 | 1,22 |
| 5,0 | 5,3 | 1,88 | 6,81  | 2,24 |
| 5,2 | 5,5 | 1,98 | 6,59  | 2,54 |
| 5,2 | 5,9 | NAN  | NAN   | 1,43 |
| 4,9 | 5,0 | 3,16 | 7,50  | 1,69 |
| 5,0 | 5,5 | 1,85 | 5,20  | 1,68 |
| 5,0 | 4,1 | NAN  | NAN   | 2,15 |
| 5,0 | 5,2 | 1,51 | 7,40  | 3,77 |
| NAN | 5,5 | 1,95 | 8,21  | 2,03 |
| 5,1 | 5,4 | 1,83 | 7,35  | 1,99 |
| 4,9 | 5,6 | 1,00 | 7,24  | 1,48 |
| 5,1 | 5,6 | 2,01 | 6,58  | 1,66 |

|     |     |      |      |      |
|-----|-----|------|------|------|
| 5,2 | 5,7 | 1,48 | 6,59 | 0,89 |
| 5,4 | 5,7 | 1,78 | 7,13 | 1,05 |
| 5,1 | 5,2 | 3,99 | 5,27 | 3,22 |
| 5,2 | 5,9 | 2,34 | 5,31 | 1,72 |
| 5,6 | 5,9 | NAN  | NAN  | 1,05 |
| 4,7 | 5,2 | NAN  | NAN  | 0,90 |
| 4,4 | 4,9 | 0,63 | 6,66 | 1,03 |
| 5,0 | 5,3 | 0,90 | 6,95 | 1,73 |
| 5,1 | 5,7 | 1,30 | 6,79 | 2,61 |
| 5,1 | 5,7 | 1,33 | 5,47 | 0,69 |
| 5,2 | 5,9 | NAN  | NAN  | 1,56 |
| 4,9 | 5,4 | 2,14 | 6,96 | 1,45 |
| 4,6 | 5,2 | 3,70 | 7,09 | 2,67 |
| 4,6 | 5,3 | 1,89 | 7,48 | 3,13 |
| 5,2 | 5,4 | 2,35 | 7,59 | 1,67 |
| 5,0 | 5,5 | 3,26 | 5,70 | 1,91 |

| FT4 (ng/dl) 2<br>Yrs PD | FP Insulin (mcU/ml)<br>24 gw | FP Insulin (mcU/ml) 2<br>years PD | Insulin Increase from baseline 24 GW |
|-------------------------|------------------------------|-----------------------------------|--------------------------------------|
| 13,52                   | 6,55                         | 5,93                              | -5,35                                |
| 8,96                    | 7,24                         | 8,55                              | -4,36                                |
| 8,28                    | 6,27                         | 10,39                             | -3,87                                |
| 8,49                    | 16,39                        | 11,68                             | -12,91                               |
| 8,36                    | 13,39                        | 13,23                             | -0,67                                |
| 10,23                   | 19,81                        | 9,82                              | 22,95                                |
| 7,66                    | 5,69                         | 5,11                              | -4,49                                |
| 7,76                    | 7,69                         | 5,75                              | -4,89                                |
| 9,37                    | 8,88                         | 6,41                              | -2,24                                |
| 8,60                    | 12,90                        | 24,65                             | -3,34                                |
| 7,89                    | 7,10                         | 6,07                              | -4,34                                |
| 7,30                    | 9,73                         | 37,05                             | -1,49                                |
| 8,79                    | 5,31                         | 3,49                              | -4,11                                |
| NAN                     | 12,81                        | 8,30                              | -1,21                                |
| 7,46                    | 8,11                         | 6,56                              | -5,03                                |
| 9,15                    | 8,10                         | 7,72                              | -6,50                                |
| 9,25                    | 9,66                         | 5,99                              | -4,54                                |
| 9,08                    | 15,03                        | 42,89                             | -9,87                                |
| 10,09                   | 7,05                         | 7,48                              | -5,69                                |
| 7,38                    | 11,79                        | 13,16                             | -7,51                                |
| 7,91                    | 10,77                        | 8,37                              | -8,37                                |
| 6,90                    | 16,06                        | 16,53                             | -12,90                               |
| 8,08                    | 19,80                        | 20,83                             | -16,64                               |
| 6,62                    | 4,96                         | 8,00                              | -3,36                                |
| 7,11                    | 16,48                        | 16,51                             | -13,04                               |
| 7,00                    | 10,61                        | 14,21                             | -9,41                                |
| 6,56                    | 10,02                        | 9,48                              | -8,66                                |
| 7,31                    | 10,24                        | 140,69                            | -5,88                                |
| 9,62                    | 17,61                        | 13,28                             | -14,17                               |
| 8,51                    | 21,48                        | 9,84                              | -17,08                               |
| 10,05                   | 12,05                        | 13,64                             | -8,61                                |
| 8,32                    | 6,26                         | 9,56                              | -3,86                                |
| 7,90                    | 18,33                        | 7,82                              | -16,97                               |
| 8,52                    | 12,84                        | 14,88                             | -10,40                               |
| 7,33                    | 6,80                         | 7,68                              | -0,04                                |
| 8,14                    | 10,76                        | 30,32                             | -6,00                                |
| 9,36                    | 5,75                         | 8,22                              | -4,55                                |
| 11,22                   | 14,20                        | 15,63                             | -7,92                                |
| 7,84                    | 18,36                        | 19,63                             | -14,12                               |
| 8,65                    | 9,22                         | 8,78                              | 16,78                                |
| 8,61                    | 13,86                        | 8,33                              | -9,10                                |
| 6,92                    | 17,08                        | 13,14                             | -13,92                               |
| 7,20                    | 11,96                        | 11,99                             | -8,80                                |
| 9,60                    | 7,57                         | 5,89                              | -0,29                                |
| 9,16                    | 10,29                        | 10,37                             | -8,49                                |
| 8,75                    | 9,36                         | 5,23                              | -0,68                                |
| 8,00                    | 11,55                        | 6,90                              | -6,75                                |

|       |       |        |        |
|-------|-------|--------|--------|
| 6,93  | 7,37  | 4,48   | -5,93  |
| 8,64  | 11,41 | 49,17  | 1,47   |
| 7,58  | 16,44 | 10,79  | -11,84 |
| 7,28  | 12,82 | 16,59  | -7,58  |
| 10,59 | 8,06  | 13,96  | -5,02  |
| 8,03  | 26,36 | 14,40  | -24,32 |
| 8,97  | 13,24 | 45,36  | -2,28  |
| NAN   | NAN   | 6,81   | NAN    |
| 9,49  | 15,87 | 10,28  | -11,75 |
| 9,36  | 5,77  | 5,51   | 11,23  |
| 10,53 | 20,91 | 9,13   | 3,85   |
| 8,98  | 10,69 | 9,04   | 6,11   |
| 6,89  | 15,91 | 9,77   | -13,07 |
| 9,54  | 9,25  | 7,30   | -2,49  |
| 9,02  | 27,75 | 11,33  | 14,37  |
| 8,74  | NAN   | 49,31  | NAN    |
| 8,63  | 13,40 | 10,80  | -11,40 |
| 11,82 | 10,46 | 6,79   | 5,22   |
| 7,40  | 12,96 | 10,96  | 3,84   |
| 9,43  | 12,43 | 9,83   | -9,47  |
| 8,45  | 8,48  | 10,26  | -0,64  |
| 8,63  | 11,64 | 7,64   | -9,56  |
| 7,56  | NAN   | 113,81 | NAN    |
| 9,10  | 7,26  | 5,53   | -6,02  |
| 9,27  | 18,28 | 48,49  | 9,08   |
| 9,43  | 53,36 | 7,00   | -52,00 |
| 8,27  | 11,30 | 8,26   | 3,10   |
| 8,29  | 15,90 | 17,88  | -9,58  |
| 7,73  | 10,38 | 11,02  | -7,10  |
| 7,86  | 8,76  | 7,65   | -7,20  |
| 8,06  | 8,03  | 10,90  | -5,59  |
| 7,84  | 7,03  | 8,56   | -5,83  |
| 7,45  | 14,87 | 12,47  | -12,51 |
| 9,28  | 9,25  | 6,36   | -7,45  |
| 8,70  | 8,88  | 8,51   | -7,68  |
| 7,78  | 19,44 | 11,46  | -5,76  |
| 8,32  | 10,06 | 10,42  | -2,98  |
| 8,23  | 10,14 | 17,22  | -6,10  |
| 8,27  | 10,83 | 13,95  | -3,27  |
| 9,82  | 9,88  | 8,77   | -8,68  |
| 9,12  | 8,98  | 5,68   | 6,38   |
| 8,90  | 21,55 | 14,28  | -17,55 |
| 8,29  | 14,45 | 14,34  | -8,13  |
| 7,13  | 6,59  | 5,40   | -5,39  |
| 9,43  | 7,03  | 7,30   | -4,87  |
| 7,54  | 10,80 | 9,84   | 3,76   |
| 7,68  | 54,80 | 7,68   | -53,60 |
| 8,97  | 10,66 | 3,77   | -8,58  |
| 8,14  | 17,03 | 10,66  | -4,19  |
| 8,08  | 6,03  | 6,48   | -2,99  |

|       |        |        |         |
|-------|--------|--------|---------|
| 9,18  | 8,64   | 6,17   | -7,28   |
| 6,96  | 13,83  | 13,73  | -10,99  |
| 8,03  | 6,16   | 5,87   | 5,56    |
| 8,25  | 86,55  | 31,00  | -82,87  |
| 8,37  | 16,52  | 8,50   | -3,52   |
| 8,18  | 14,19  | 33,43  | -12,91  |
| 8,57  | 13,36  | 13,93  | -5,48   |
| 8,37  | 8,34   | 7,78   | 6,22    |
| 5,99  | 14,29  | 11,85  | 7,03    |
| 8,17  | 6,27   | NAN    | 0,77    |
| 6,90  | 10,54  | 10,91  | -8,22   |
| 7,71  | 8,15   | 12,83  | -5,03   |
| 7,97  | 5,00   | 5,29   | -3,80   |
| 7,97  | 7,06   | 23,81  | -5,06   |
| 8,32  | 18,89  | 46,56  | -14,57  |
| 7,51  | 18,81  | 9,32   | -16,29  |
| 8,89  | 8,54   | NAN    | -5,02   |
| 9,44  | 7,14   | 3,98   | -1,82   |
| 8,10  | 10,74  | 15,08  | -9,06   |
| 9,44  | 12,88  | 24,99  | -11,08  |
| 6,86  | 5,21   | 2,78   | 5,39    |
| 8,27  | 9,51   | 10,40  | -0,59   |
| 9,07  | 16,36  | 11,97  | 17,72   |
| 6,70  | 11,15  | 6,68   | -9,23   |
| 8,25  | 21,64  | 11,58  | -17,52  |
| 9,99  | 8,52   | 17,01  | -6,16   |
| 8,82  | 12,33  | 8,90   | 14,83   |
| 9,09  | 12,28  | 7,18   | -10,36  |
| 5,87  | 18,63  | 69,61  | -10,83  |
| 8,28  | 8,12   | 7,85   | -2,96   |
| 7,35  | 83,45  | 15,66  | -74,45  |
| 7,62  | 6,07   | 4,15   | NAN     |
| 8,41  | 4,35   | 7,35   | -3,15   |
| 8,16  | 10,43  | 10,93  | -7,47   |
| 6,51  | 21,29  | 132,12 | 12,75   |
| 10,10 | 16,09  | 7,84   | -4,29   |
| 3,41  | 23,00  | 52,51  | -20,44  |
| 8,95  | 8,35   | 30,05  | -5,95   |
| 10,41 | 65,14  | 13,02  | -62,66  |
| 7,27  | 11,94  | 9,38   | -8,82   |
| 9,31  | 137,27 | 7,63   | -135,87 |
| 7,15  | 19,38  | 20,32  | -15,94  |
| 10,90 | 16,98  | 10,22  | 6,58    |
| 9,17  | 10,79  | 43,04  | -9,59   |
| NAN   | 14,90  | 8,21   | 4,18    |
| 8,90  | 7,16   | 5,15   | -5,96   |
| 9,78  | 7,97   | 7,75   | -6,77   |
| 6,93  | 11,79  | 7,07   | -10,23  |
| 8,27  | 9,45   | 10,04  | -6,25   |
| 5,81  | 14,23  | 8,83   | -10,03  |

|       |       |         |        |
|-------|-------|---------|--------|
| 9,87  | 7,95  | 8,79    | -2,35  |
| 9,52  | 17,68 | 7,70    | -11,28 |
| 9,79  | 10,05 | 5,65    | -8,61  |
| 7,94  | 14,73 | 12,11   | -6,49  |
| 8,28  | 8,10  | 4,36    | 0,34   |
| 8,78  | 8,06  | 6,52    | -5,54  |
| 7,90  | 11,39 | 5,78    | 16,13  |
| 10,03 | 10,56 | 9,21    | -3,92  |
| 9,35  | 12,98 | 7,94    | -2,86  |
| 8,85  | 4,19  | 5,93    | -2,79  |
| 7,73  | 4,23  | 9999,00 | -3,03  |
| 7,95  | 8,60  | 5,89    | 0,68   |
| 7,83  | 7,98  | 6,58    | -6,22  |
| 7,04  | 7,46  | 5,89    | 0,22   |
| 8,51  | 9,12  | 10,07   | -7,24  |
| 9,09  | 18,87 | 10,35   | -14,35 |
| 7,59  | 11,16 | 41,86   | -7,84  |
| 7,17  | 8,68  | 8,72    | -7,08  |
| 7,26  | 19,99 | 12,29   | -5,75  |
| 6,76  | 6,37  | 7,92    | -4,61  |
| 8,02  | 12,59 | 56,04   | -3,31  |
| 9,48  | 5,41  | 7,90    | 14,59  |
| 8,10  | 23,85 | 19,54   | -17,73 |
| 9,53  | 8,45  | 6,37    | 11,95  |
| 6,70  | 15,67 | 28,77   | -14,03 |
| 7,40  | 10,51 | 7,83    | -8,99  |
| 8,80  | 6,18  | 4,59    | 2,98   |
| 8,29  | 72,85 | 13,20   | -70,25 |
| 7,81  | 14,35 | 10,25   | -10,47 |
| 7,65  | 4,55  | 3,44    | 2,97   |
| 8,46  | 7,70  | 5,03    | -6,50  |
| 8,29  | 8,65  | 9,61    | -4,69  |
| 9,91  | 10,48 | 6,71    | -8,16  |
| 6,90  | 6,78  | 11,34   | -4,58  |
| 9,33  | 12,01 | 69,33   | 2,31   |
| 7,80  | 10,35 | 9,02    | -7,95  |
| 8,37  | 14,39 | 14,91   | -12,35 |
| 8,92  | 8,08  | 8,79    | -5,00  |
| 8,57  | 10,29 | 9,04    | 12,47  |
| 6,58  | 8,34  | 14,13   | -4,94  |
| 9,10  | 8,69  | 8,83    | 7,83   |
| 7,60  | 8,67  | 9,94    | -6,95  |
| 7,32  | 5,85  | 5,87    | -4,57  |
| 11,84 | 7,15  | 4,15    | -2,87  |
| 7,75  | 11,12 | 12,19   | 8,92   |
| 8,47  | 11,65 | 8,61    | 14,59  |
| 8,76  | 6,52  | 5,15    | -4,08  |
| 9,80  | 10,14 | 7,49    | -8,46  |
| 7,26  | 6,42  | 4,89    | 1,54   |
| 8,57  | 8,53  | 8,20    | -1,25  |

|       |       |       |        |
|-------|-------|-------|--------|
| 8,10  | 13,71 | 39,22 | -10,67 |
| 7,91  | 9,21  | 9,70  | 6,35   |
| 7,49  | 7,19  | 6,92  | -1,35  |
| 8,41  | 12,48 | 13,39 | -8,44  |
| 8,14  | 5,27  | 7,46  | 4,69   |
| 7,45  | 11,40 | 14,49 | -9,12  |
| 7,59  | 8,44  | 5,43  | -7,24  |
| 8,03  | 9,16  | 10,55 | -5,80  |
| 7,91  | 5,39  | 16,36 | -3,03  |
| 7,08  | 8,70  | 7,97  | -6,22  |
| 8,16  | 6,56  | 5,75  | -4,36  |
| 8,36  | 9,14  | 8,70  | -4,50  |
| 7,89  | 4,90  | 2,68  | -1,54  |
| 8,63  | 16,79 | 17,61 | -11,43 |
| 7,81  | 52,08 | 6,18  | -30,40 |
| 7,35  | 13,77 | 10,51 | -12,49 |
| 6,72  | 11,61 | 9,85  | -2,33  |
| 7,73  | 9,16  | 5,55  | -7,12  |
| 7,39  | 5,13  | 8,62  | 1,51   |
| 7,64  | 27,07 | 6,67  | -22,23 |
| 8,70  | 15,32 | 7,64  | -12,44 |
| 7,33  | 12,11 | 10,55 | 4,33   |
| 6,54  | 7,58  | 7,28  | -6,30  |
| 7,93  | 9,74  | 6,13  | 12,10  |
| 6,93  | 5,79  | 10,42 | -2,35  |
| 5,48  | 12,44 | 20,72 | -9,64  |
| 6,47  | 9,42  | 7,91  | -6,98  |
| 6,81  | 7,41  | 10,98 | -4,61  |
| 8,60  | 10,00 | 8,07  | -8,32  |
| 9,36  | 10,08 | 6,23  | -2,36  |
| 7,35  | 19,21 | 9,40  | -18,01 |
| 8,34  | 7,72  | 6,76  | -5,88  |
| 8,81  | 8,61  | 12,42 | -6,69  |
| 9,30  | 8,54  | 11,26 | -1,22  |
| 8,36  | 9,66  | 8,61  | 3,98   |
| 9,91  | 14,52 | 14,58 | -11,52 |
| 7,66  | 7,89  | 4,34  | -5,57  |
| 7,74  | 6,66  | 5,76  | 6,98   |
| 7,14  | 6,66  | 16,10 | -2,26  |
| 6,03  | 9,54  | 12,93 | -5,26  |
| 7,30  | 32,55 | 7,90  | -30,51 |
| 7,68  | 10,30 | 6,86  | -8,46  |
| 8,10  | 8,08  | 8,77  | -6,48  |
| 7,92  | 12,88 | 7,43  | -9,72  |
| 6,77  | 4,53  | 4,41  | -2,93  |
| 8,83  | 4,21  | 6,69  | -2,89  |
| 8,22  | 11,93 | 7,30  | -10,21 |
| 6,76  | 13,56 | 12,81 | -4,32  |
| 8,05  | 7,03  | 3,99  | 4,77   |
| 10,32 | 8,71  | 9,48  | -4,15  |

|       |       |        |        |
|-------|-------|--------|--------|
| 8,39  | 10,80 | 8,04   | -9,04  |
| 7,38  | 9,45  | 6,42   | -2,45  |
| 8,36  | 16,54 | 30,10  | -13,02 |
| 7,74  | 14,00 | 17,21  | -4,20  |
| 8,38  | 11,53 | 14,42  | -6,69  |
| 7,42  | 7,24  | 6,23   | 3,80   |
| 9,27  | 7,18  | 7,52   | -5,06  |
| 12,11 | 7,22  | 23,56  | 7,26   |
| 8,85  | 6,02  | 6,99   | -1,02  |
| 10,21 | 7,95  | 8,79   | -6,59  |
| 7,67  | NAN   | 8,37   | NAN    |
| 7,62  | 6,73  | 10,59  | -5,01  |
| 8,10  | 9,05  | 8,79   | -7,73  |
| 8,48  | 28,47 | 6,91   | -13,31 |
| 6,06  | 19,28 | 13,65  | -14,64 |
| 6,94  | 24,90 | 20,50  | -19,42 |
| 8,94  | 5,05  | 9,90   | -1,25  |
| 6,51  | 8,22  | 6,09   | 0,94   |
| 7,17  | 4,60  | 6,55   | -3,24  |
| 9,06  | 13,77 | 8,41   | -0,77  |
| 7,37  | 7,81  | 5,68   | -6,53  |
| 10,17 | 11,34 | 8,71   | -7,46  |
| 7,87  | 12,04 | 25,09  | -10,56 |
| 8,63  | 14,63 | 9,34   | -7,99  |
| 9,07  | 14,88 | 12,24  | -5,20  |
| 8,89  | 8,58  | 5,93   | -3,18  |
| 7,28  | 15,14 | 131,23 | -9,78  |
| 7,18  | 6,74  | 8,58   | -3,78  |
| 7,71  | 31,05 | 4,68   | -29,53 |
| 8,77  | 14,38 | 9,90   | -12,14 |
| 6,51  | 8,91  | 7,19   | 7,25   |
| 7,79  | 9,14  | 19,48  | -6,26  |
| 6,99  | 10,31 | 8,80   | -8,55  |
| 9,39  | 9,03  | 8,56   | -3,39  |
| 7,23  | 6,76  | 77,28  | 3,72   |
| 7,76  | 8,06  | 6,77   | -4,38  |
| 8,54  | 4,94  | 9,92   | -3,74  |
| 9,14  | 5,13  | 6,47   | 3,07   |
| 10,42 | 6,96  | 9,21   | 5,24   |
| 5,94  | 3,62  | 7,80   | -1,78  |
| 7,45  | NAN   | 6,52   | NAN    |
| 8,69  | 9,80  | 38,37  | 9,00   |
| 7,51  | 45,75 | 9,20   | -37,27 |
| 8,89  | 9,44  | 8,83   | -7,12  |
| 8,51  | 4,66  | 11,46  | 3,46   |
| 9,10  | 6,58  | 7,21   | -5,22  |
| 7,68  | 4,95  | 11,09  | -2,39  |
| 8,56  | 6,28  | 7,34   | -3,96  |
| 9,13  | 6,30  | 6,54   | -1,22  |
| 8,38  | 10,05 | 30,88  | 19,99  |



|      |       |         |       |
|------|-------|---------|-------|
| 7,95 | 10,08 | 11,74   | 15,28 |
| 8,12 | 7,84  | 12,78   | -4,52 |
| 5,85 | 13,84 | 19,19   | 0,08  |
| 7,40 | 5,21  | 6,77    | 8,11  |
| 7,10 | 8,17  | 10,63   | 0,63  |
| 7,85 | 4,11  | 5,56    | -0,83 |
| 6,37 | 10,99 | 18,00   | -7,19 |
| 7,11 | 4,00  | 11,35   | -1,64 |
| 6,86 | 5,01  | 6,51    | -2,93 |
| 8,10 | 11,88 | 28,99   | 4,12  |
| 6,62 | 10,12 | 10,14   | -4,12 |
| 6,61 | 3,38  | 8,67    | -1,02 |
| 8,76 | 4,51  | 9999,00 | -1,03 |
| 7,37 | 8,41  | 11,07   | -4,13 |
| 8,66 | 7,11  | 5,79    | -5,31 |
| 7,14 | 4,40  | 15,39   | -2,36 |

## Insulin Increase from baseline 2 yrs PD

## Insulin change from baseline 24 GW

|         |        |
|---------|--------|
| -4,73   | -4,46  |
| -5,67   | -1,51  |
| -7,99   | -1,61  |
| -8,20   | -3,71  |
| -0,51   | -0,05  |
| 32,94   | 0,54   |
| -3,91   | -3,74  |
| -2,95   | -1,75  |
| 0,23    | -0,34  |
| -15,09  | -0,35  |
| -3,31   | -1,57  |
| -28,81  | -0,18  |
| -2,29   | -3,43  |
| 3,30    | -0,10  |
| -3,48   | -1,63  |
| -6,12   | -4,06  |
| -0,87   | -0,89  |
| -37,73  | -1,91  |
| -6,12   | -4,18  |
| -8,88   | -1,75  |
| -5,97   | -3,49  |
| -13,37  | -4,08  |
| -17,67  | -5,27  |
| -6,40   | -2,10  |
| -13,07  | -3,79  |
| -13,01  | -7,84  |
| -8,12   | -6,37  |
| -136,33 | -1,35  |
| -9,84   | -4,12  |
| -5,44   | -3,88  |
| -10,20  | -2,50  |
| -7,16   | -1,61  |
| -6,46   | -12,48 |
| -12,44  | -4,26  |
| -0,92   | -0,01  |
| -25,56  | -1,26  |
| -7,02   | -3,79  |
| -9,35   | -1,26  |
| -15,39  | -3,33  |
| 17,22   | 0,65   |
| -3,57   | -1,91  |
| -9,98   | -4,41  |
| -8,83   | -2,78  |
| 1,39    | -0,04  |
| -8,57   | -4,72  |
| 3,45    | -0,08  |
| -2,10   | -1,41  |

|         |        |
|---------|--------|
| -3,04   | -4,12  |
| -36,29  | 0,11   |
| -6,19   | -2,57  |
| -11,35  | -1,45  |
| -10,92  | -1,65  |
| -12,36  | -11,92 |
| -34,40  | -0,21  |
| -4,37   | NAN    |
| -6,16   | -2,85  |
| 11,49   | 0,66   |
| 15,63   | 0,16   |
| 7,76    | 0,36   |
| -6,93   | -4,60  |
| -0,54   | -0,37  |
| 30,79   | 0,34   |
| -18,19  | NAN    |
| -8,80   | -5,70  |
| 8,89    | 0,33   |
| 5,84    | 0,23   |
| -6,87   | -3,20  |
| -2,42   | -0,08  |
| -5,56   | -4,60  |
| -111,09 | NAN    |
| -4,29   | -4,85  |
| -21,13  | 0,33   |
| -5,64   | -38,24 |
| 6,14    | 0,22   |
| -11,56  | -1,52  |
| -7,74   | -2,16  |
| -6,09   | -4,62  |
| -8,46   | -2,29  |
| -7,36   | -4,86  |
| -10,11  | -5,30  |
| -4,56   | -4,14  |
| -7,31   | -6,40  |
| 2,22    | -0,42  |
| -3,34   | -0,42  |
| -13,18  | -1,51  |
| -6,39   | -0,43  |
| -7,57   | -7,23  |
| 9,68    | 0,42   |
| -10,28  | -4,39  |
| -8,02   | -1,29  |
| -4,20   | -4,49  |
| -5,14   | -2,25  |
| 4,72    | 0,26   |
| -6,48   | -44,67 |
| -1,69   | -4,13  |
| 2,18    | -0,33  |
| -3,44   | -0,98  |

|        |        |
|--------|--------|
| -4,81  | -5,35  |
| -10,89 | -3,87  |
| 5,85   | 0,47   |
| -27,32 | -22,52 |
| 4,50   | -0,27  |
| -32,15 | -10,09 |
| -6,05  | -0,70  |
| 6,78   | 0,43   |
| 9,47   | 0,33   |
| NAN    | 0,11   |
| -8,59  | -3,54  |
| -9,71  | -1,61  |
| -4,09  | -3,17  |
| -21,81 | -2,53  |
| -42,24 | -3,37  |
| -6,80  | -6,46  |
| NAN    | -1,43  |
| 1,34   | -0,34  |
| -13,40 | -5,39  |
| -23,19 | -6,16  |
| 7,82   | 0,51   |
| -1,48  | -0,07  |
| 22,11  | 0,52   |
| -4,76  | -4,81  |
| -7,46  | -4,25  |
| -14,65 | -2,61  |
| 18,26  | 0,55   |
| -5,26  | -5,40  |
| -61,81 | -1,39  |
| -2,69  | -0,57  |
| -6,66  | -8,27  |
| NAN    | NAN    |
| -6,15  | -2,63  |
| -7,97  | -2,52  |
| -98,08 | 0,37   |
| 3,96   | -0,36  |
| -49,95 | -7,98  |
| -27,65 | -2,48  |
| -10,54 | -25,27 |
| -6,26  | -2,83  |
| -6,23  | -97,05 |
| -16,88 | -4,63  |
| 13,34  | 0,28   |
| -41,84 | -7,99  |
| 10,87  | 0,22   |
| -3,95  | -4,97  |
| -6,55  | -5,64  |
| -5,51  | -6,56  |
| -6,84  | -1,95  |
| -4,63  | -2,39  |

|        |        |
|--------|--------|
| -3,19  | -0,42  |
| -1,30  | -1,76  |
| -4,21  | -5,98  |
| -3,87  | -0,79  |
| 4,08   | 0,04   |
| -4,00  | -2,20  |
| 21,74  | 0,59   |
| -2,57  | -0,59  |
| 2,18   | -0,28  |
| -4,53  | -1,99  |
| NAN    | -2,53  |
| 3,39   | 0,07   |
| -4,82  | -3,53  |
| 1,79   | 0,03   |
| -8,19  | -3,85  |
| -5,83  | -3,17  |
| -38,54 | -2,36  |
| -7,12  | -4,43  |
| 1,95   | -0,40  |
| -6,16  | -2,62  |
| -46,76 | -0,36  |
| 12,10  | 0,73   |
| -13,42 | -2,90  |
| 14,03  | 0,59   |
| -27,13 | -8,55  |
| -6,31  | -5,91  |
| 4,57   | 0,33   |
| -10,60 | -27,02 |
| -6,37  | -2,70  |
| 4,08   | 0,39   |
| -3,83  | -5,42  |
| -5,65  | -1,18  |
| -4,39  | -3,52  |
| -9,14  | -2,08  |
| -55,01 | 0,16   |
| -6,62  | -3,31  |
| -12,87 | -6,05  |
| -5,71  | -1,62  |
| 13,72  | 0,55   |
| -10,73 | -1,45  |
| 7,69   | 0,47   |
| -8,22  | -4,04  |
| -4,59  | -3,57  |
| 0,13   | -0,67  |
| 7,85   | 0,45   |
| 17,63  | 0,56   |
| -2,71  | -1,67  |
| -5,81  | -5,04  |
| 3,07   | 0,19   |
| -0,92  | -0,17  |

|        |        |
|--------|--------|
| -36,18 | -3,51  |
| 5,86   | 0,41   |
| -1,08  | -0,23  |
| -9,35  | -2,09  |
| 2,50   | 0,47   |
| -12,21 | -4,00  |
| -4,23  | -6,03  |
| -7,19  | -1,73  |
| -14,00 | -1,28  |
| -5,49  | -2,51  |
| -3,55  | -1,98  |
| -4,06  | -0,97  |
| 0,68   | -0,46  |
| -12,25 | -2,13  |
| 15,50  | -1,40  |
| -9,23  | -9,76  |
| -0,57  | -0,25  |
| -3,51  | -3,49  |
| -1,98  | 0,23   |
| -1,83  | -4,59  |
| -4,76  | -4,32  |
| 5,89   | 0,26   |
| -6,00  | -4,92  |
| 15,71  | 0,55   |
| -6,98  | -0,68  |
| -17,92 | -3,44  |
| -5,47  | -2,86  |
| -8,18  | -1,65  |
| -6,39  | -4,95  |
| 1,49   | -0,31  |
| -8,20  | -15,01 |
| -4,92  | -3,20  |
| -10,50 | -3,48  |
| -3,94  | -0,17  |
| 5,03   | 0,29   |
| -11,58 | -3,84  |
| -2,02  | -2,40  |
| 7,88   | 0,51   |
| -11,70 | -0,51  |
| -8,65  | -1,23  |
| -5,86  | -14,96 |
| -5,02  | -4,60  |
| -7,17  | -4,05  |
| -4,27  | -3,08  |
| -2,81  | -1,83  |
| -5,37  | -2,19  |
| -5,58  | -5,94  |
| -3,57  | -0,47  |
| 7,81   | 0,40   |
| -4,92  | -0,91  |

|         |        |
|---------|--------|
| -6,28   | -5,14  |
| 0,58    | -0,35  |
| -26,58  | -3,70  |
| -7,41   | -0,43  |
| -9,58   | -1,38  |
| 4,81    | 0,34   |
| -5,40   | -2,39  |
| -9,08   | 0,50   |
| -1,99   | -0,20  |
| -7,43   | -4,85  |
| -5,57   | NAN    |
| -8,87   | -2,91  |
| -7,47   | -5,86  |
| 8,25    | -0,88  |
| -9,01   | -3,16  |
| -15,02  | -3,54  |
| -6,10   | -0,33  |
| 3,07    | 0,10   |
| -5,19   | -2,38  |
| 4,59    | -0,06  |
| -4,40   | -5,10  |
| -4,83   | -1,92  |
| -23,61  | -7,14  |
| -2,70   | -1,20  |
| -2,56   | -0,54  |
| -0,53   | -0,59  |
| -125,87 | -1,82  |
| -5,62   | -1,28  |
| -3,16   | -19,43 |
| -7,66   | -5,42  |
| 8,97    | 0,45   |
| -16,60  | -2,17  |
| -7,04   | -4,86  |
| -2,92   | -0,60  |
| -66,80  | 0,35   |
| -3,09   | -1,19  |
| -8,72   | -3,12  |
| 1,73    | 0,37   |
| 2,99    | 0,43   |
| -5,96   | -0,97  |
| -4,40   | NAN    |
| -19,57  | 0,48   |
| -0,72   | -4,40  |
| -6,51   | -3,07  |
| -3,34   | 0,43   |
| -5,85   | -3,84  |
| -8,53   | -0,93  |
| -5,02   | -1,71  |
| -1,46   | -0,24  |
| -0,84   | 0,67   |

|        |       |
|--------|-------|
| 13,62  | 0,60  |
| -9,46  | -1,36 |
| -5,27  | 0,01  |
| 6,55   | 0,61  |
| -1,83  | 0,07  |
| -2,28  | -0,25 |
| -14,20 | -1,89 |
| -8,99  | -0,69 |
| -4,43  | -1,41 |
| -12,99 | 0,26  |
| -4,14  | -0,69 |
| -6,31  | -0,43 |
| NAN    | -0,30 |
| -6,79  | -0,96 |
| -3,99  | -2,95 |
| -13,35 | -1,16 |



| Insulin change from baseline 2 yrs PD | HOMA-IR 24<br>gw | HOMA-IR 2<br>years PD |
|---------------------------------------|------------------|-----------------------|
| -3,94                                 | 1,23             | 1,20                  |
| -1,97                                 | 1,54             | 1,94                  |
| -3,33                                 | 1,36             | 2,46                  |
| -2,36                                 | 4,25             | 2,91                  |
| -0,04                                 | 3,01             | 3,36                  |
| 0,77                                  | 4,26             | 2,38                  |
| -3,26                                 | 1,24             | 1,15                  |
| -1,05                                 | 1,73             | 1,28                  |
| 0,03                                  | 2,15             | 1,47                  |
| -1,58                                 | 3,06             | 6,15                  |
| -1,20                                 | 1,44             | 1,32                  |
| -3,50                                 | 2,16             | 9,61                  |
| -1,91                                 | 1,21             | 0,77                  |
| 0,28                                  | 2,78             | 1,97                  |
| -1,13                                 | 1,68             | 1,28                  |
| -3,83                                 | 1,74             | 1,70                  |
| -0,17                                 | 1,88             | 1,11                  |
| -7,31                                 | 3,41             | 9,53                  |
| -4,50                                 | 1,34             | 1,74                  |
| -2,07                                 | 2,82             | 3,25                  |
| -2,49                                 | 2,23             | 1,88                  |
| -4,23                                 | 3,25             | 3,96                  |
| -5,59                                 | 4,30             | 5,19                  |
| -4,00                                 | 0,98             | 1,72                  |
| -3,80                                 | 3,74             | 4,00                  |
| -10,84                                | 2,20             | 3,40                  |
| -5,97                                 | 2,30             | 2,27                  |
| -31,27                                | 2,02             | 34,74                 |
| -2,86                                 | 4,48             | 3,41                  |
| -1,24                                 | 4,67             | 2,28                  |
| -2,97                                 | 2,77             | 3,54                  |
| -2,98                                 | 1,44             | 2,41                  |
| -4,75                                 | 4,53             | 1,85                  |
| -5,10                                 | 2,66             | 3,45                  |
| -0,14                                 | 1,39             | 1,71                  |
| -5,37                                 | 2,15             | 6,44                  |
| -5,85                                 | 1,14             | 1,99                  |
| -1,49                                 | 2,88             | 3,36                  |
| -3,63                                 | 3,90             | 4,65                  |
| 0,66                                  | 1,80             | 1,82                  |
| -0,75                                 | 3,18             | 2,00                  |
| -3,16                                 | 4,30             | 3,28                  |
| -2,79                                 | 2,42             | 2,72                  |
| 0,19                                  | 1,63             | 1,28                  |
| -4,76                                 | 2,24             | 2,41                  |
| 0,40                                  | 1,80             | 1,11                  |
| -0,44                                 | 2,37             | 1,60                  |

|        |       |       |
|--------|-------|-------|
| -2,11  | 1,47  | 0,92  |
| -2,82  | 2,23  | 10,68 |
| -1,35  | 3,29  | 2,34  |
| -2,17  | 2,88  | 3,97  |
| -3,59  | 1,53  | 3,10  |
| -6,06  | 6,05  | 3,34  |
| -3,14  | 2,65  | 9,52  |
| -1,79  | NAN   | 1,53  |
| -1,50  | 3,17  | 2,16  |
| 0,68   | 1,13  | 1,12  |
| 0,63   | 4,49  | 2,07  |
| 0,46   | 1,90  | 1,90  |
| -2,44  | 3,22  | 2,29  |
| -0,08  | 2,06  | 1,71  |
| 0,73   | 6,17  | 2,77  |
| -0,58  | NAN   | 10,71 |
| -4,40  | 2,88  | 2,85  |
| 0,57   | 2,14  | 1,51  |
| 0,35   | 2,62  | 2,49  |
| -2,32  | 2,55  | 2,33  |
| -0,31  | 1,72  | 2,20  |
| -2,67  | 2,53  | 1,72  |
| -40,84 | NAN   | 25,29 |
| -3,46  | 1,43  | 1,20  |
| -0,77  | 3,48  | 10,54 |
| -4,15  | 10,80 | 1,75  |
| 0,43   | 2,62  | 1,92  |
| -1,83  | 3,77  | 4,46  |
| -2,36  | 2,08  | 2,50  |
| -3,90  | 1,80  | 1,61  |
| -3,47  | 1,53  | 2,56  |
| -6,13  | 1,58  | 1,90  |
| -4,28  | 3,52  | 3,20  |
| -2,53  | 1,60  | 1,32  |
| -6,09  | 1,84  | 1,87  |
| 0,16   | 4,08  | 2,52  |
| -0,47  | 1,71  | 2,21  |
| -3,26  | 2,03  | 4,97  |
| -0,85  | 2,19  | 2,96  |
| -6,31  | 2,10  | 2,17  |
| 0,63   | 2,02  | 1,32  |
| -2,57  | 5,27  | 3,81  |
| -1,27  | 3,00  | 3,26  |
| -3,50  | 1,38  | 1,35  |
| -2,38  | 1,41  | 1,46  |
| 0,32   | 2,27  | 2,36  |
| -5,40  | 11,37 | 1,86  |
| -0,81  | 2,50  | 0,85  |
| 0,17   | 3,78  | 2,37  |
| -1,13  | 1,22  | 1,55  |

|        |       |       |
|--------|-------|-------|
| -3,54  | 1,83  | 1,43  |
| -3,83  | 2,87  | 2,85  |
| 0,50   | 1,25  | 1,36  |
| -7,42  | 18,81 | 6,81  |
| 0,35   | 3,55  | 1,85  |
| -25,12 | 3,08  | 7,51  |
| -0,77  | 2,70  | 3,23  |
| 0,47   | 1,79  | 1,75  |
| 0,44   | 3,10  | 2,96  |
| NAN    | 1,39  | NAN   |
| -3,70  | 1,90  | 2,34  |
| -3,11  | 1,75  | 3,23  |
| -3,41  | 0,99  | 1,21  |
| -10,91 | 1,39  | 5,47  |
| -9,78  | 4,48  | 10,81 |
| -2,70  | 4,13  | 2,16  |
| NAN    | 1,69  | NAN   |
| 0,25   | 1,57  | 0,85  |
| -7,98  | 1,96  | 3,05  |
| -12,88 | 2,61  | 5,55  |
| 0,74   | 1,09  | 0,62  |
| -0,17  | 2,09  | 2,21  |
| 0,65   | 3,35  | 2,75  |
| -2,48  | 2,37  | 1,30  |
| -1,81  | 5,18  | 2,74  |
| -6,21  | 1,73  | 3,65  |
| 0,67   | 2,44  | 1,96  |
| -2,74  | 2,55  | 1,65  |
| -7,92  | 4,55  | 16,50 |
| -0,52  | 1,68  | 1,78  |
| -0,74  | 18,54 | 3,60  |
| NAN    | 1,36  | 1,05  |
| -5,13  | 0,87  | 1,74  |
| -2,69  | 2,21  | 2,54  |
| -2,88  | 4,63  | 36,54 |
| 0,34   | 3,26  | 1,66  |
| -19,51 | 5,57  | 13,10 |
| -11,52 | 1,92  | 7,94  |
| -4,25  | 13,67 | 3,02  |
| -2,01  | 2,36  | 2,06  |
| -4,45  | 28,13 | 1,71  |
| -4,91  | 4,12  | 5,27  |
| 0,57   | 4,02  | 2,50  |
| -34,87 | 2,10  | 10,31 |
| 0,57   | 3,09  | 1,82  |
| -3,29  | 1,52  | 1,20  |
| -5,46  | 1,61  | 1,78  |
| -3,53  | 2,47  | 1,68  |
| -2,14  | 1,77  | 2,03  |
| -1,10  | 3,34  | 2,03  |

|        |       |       |
|--------|-------|-------|
| -0,57  | 1,83  | 2,06  |
| -0,20  | 4,23  | 1,81  |
| -2,92  | 2,03  | 1,14  |
| -0,47  | 2,98  | 2,81  |
| 0,48   | 1,96  | 1,04  |
| -1,59  | 1,45  | 1,50  |
| 0,79   | 2,28  | 1,18  |
| -0,39  | 2,24  | 1,98  |
| 0,22   | 2,79  | 1,71  |
| -3,24  | 0,83  | 1,49  |
| NAN    | 0,79  | NAN   |
| 0,37   | 1,76  | 1,27  |
| -2,74  | 1,77  | 1,53  |
| 0,23   | 1,57  | 1,45  |
| -4,36  | 1,71  | 2,36  |
| -1,29  | 4,05  | 2,33  |
| -11,61 | 2,18  | 10,03 |
| -4,45  | 1,65  | 1,89  |
| 0,14   | 4,69  | 2,85  |
| -3,50  | 1,27  | 1,82  |
| -5,04  | 2,46  | 12,04 |
| 0,61   | 1,15  | 1,70  |
| -2,19  | 5,12  | 4,63  |
| 0,69   | 1,86  | 1,45  |
| -16,54 | 3,60  | 7,74  |
| -4,15  | 2,26  | 1,84  |
| 0,50   | 1,27  | 0,91  |
| -4,08  | 13,49 | 3,23  |
| -1,64  | 3,19  | 2,40  |
| 0,54   | 0,92  | 0,79  |
| -3,19  | 1,54  | 1,11  |
| -1,43  | 1,67  | 2,09  |
| -1,89  | 2,33  | 1,42  |
| -4,15  | 1,36  | 2,88  |
| -3,84  | 2,76  | 16,60 |
| -2,76  | 2,48  | 2,12  |
| -6,31  | 2,95  | 3,17  |
| -1,85  | 1,60  | 1,82  |
| 0,60   | 1,93  | 1,85  |
| -3,16  | 2,06  | 3,24  |
| 0,47   | 1,74  | 2,03  |
| -4,78  | 1,99  | 2,09  |
| -3,59  | 1,20  | 1,32  |
| 0,03   | 1,48  | 0,96  |
| 0,39   | 2,42  | 2,86  |
| 0,67   | 2,33  | 1,89  |
| -1,11  | 1,37  | 1,16  |
| -3,46  | 2,13  | 1,72  |
| 0,39   | 1,22  | 1,04  |
| -0,13  | 1,83  | 1,96  |

|        |       |      |
|--------|-------|------|
| -11,90 | 3,15  | 9,30 |
| 0,38   | 1,96  | 2,06 |
| -0,18  | 1,60  | 1,71 |
| -2,31  | 2,62  | 2,71 |
| 0,25   | 1,08  | 1,82 |
| -5,36  | 2,31  | 3,61 |
| -3,53  | 1,73  | 1,19 |
| -2,14  | 2,08  | 2,60 |
| -5,93  | 1,10  | 3,55 |
| -2,21  | 1,76  | 1,81 |
| -1,61  | 1,13  | 1,36 |
| -0,88  | 1,83  | 1,87 |
| 0,20   | 1,08  | 0,64 |
| -2,29  | 3,65  | 3,96 |
| 0,71   | 10,16 | 1,34 |
| -7,21  | 2,86  | 2,78 |
| -0,06  | 2,21  | 1,95 |
| -1,72  | 1,99  | 1,19 |
| -0,30  | 1,10  | 2,11 |
| -0,38  | 7,89  | 1,58 |
| -1,65  | 3,22  | 1,79 |
| 0,36   | 2,63  | 2,42 |
| -4,69  | 1,63  | 1,58 |
| 0,72   | 1,83  | 1,15 |
| -2,03  | 1,20  | 2,44 |
| -6,40  | 2,70  | 4,96 |
| -2,24  | 2,19  | 1,89 |
| -2,92  | 1,37  | 2,55 |
| -3,80  | 2,22  | 1,85 |
| 0,19   | 2,04  | 1,42 |
| -6,83  | 4,41  | 2,18 |
| -2,67  | 1,87  | 1,67 |
| -5,47  | 2,02  | 3,01 |
| -0,54  | 1,60  | 2,86 |
| 0,37   | 2,08  | 1,93 |
| -3,86  | 3,12  | 3,53 |
| -0,87  | 1,62  | 0,95 |
| 0,58   | 1,28  | 1,24 |
| -2,66  | 1,40  | 3,90 |
| -2,02  | 1,74  | 2,65 |
| -2,87  | 6,51  | 1,97 |
| -2,73  | 2,29  | 1,86 |
| -4,48  | 1,56  | 1,97 |
| -1,35  | 3,12  | 1,72 |
| -1,76  | 0,88  | 0,95 |
| -4,07  | 0,80  | 1,72 |
| -3,24  | 2,53  | 1,66 |
| -0,39  | 3,05  | 3,10 |
| 0,66   | 1,42  | 0,83 |
| -1,08  | 2,26  | 2,27 |

|        |      |       |
|--------|------|-------|
| -3,57  | 2,19 | 1,85  |
| 0,08   | 1,96 | 1,27  |
| -7,55  | 4,00 | 8,25  |
| -0,76  | 3,25 | 4,42  |
| -1,98  | 2,53 | 3,17  |
| 0,44   | 1,43 | 1,34  |
| -2,55  | 1,40 | 1,58  |
| -0,63  | 1,48 | 5,00  |
| -0,40  | 1,22 | 1,71  |
| -5,46  | 1,61 | 2,08  |
| -1,99  | NAN  | 2,13  |
| -5,16  | 1,31 | 2,43  |
| -5,66  | 2,08 | 1,89  |
| 0,54   | 7,03 | 1,74  |
| -1,94  | 4,05 | 3,24  |
| -2,74  | 5,04 | 4,71  |
| -1,61  | 1,00 | 2,42  |
| 0,34   | 1,70 | 1,23  |
| -3,82  | 0,98 | 1,62  |
| 0,35   | 2,75 | 1,85  |
| -3,44  | 1,54 | 1,29  |
| -1,24  | 2,32 | 2,00  |
| -15,95 | 2,79 | 5,95  |
| -0,41  | 2,71 | 2,08  |
| -0,26  | 3,56 | 2,93  |
| -0,10  | 1,74 | 1,13  |
| -23,48 | 3,18 | 30,78 |
| -1,90  | 1,36 | 1,93  |
| -2,08  | 6,21 | 1,04  |
| -3,42  | 3,12 | 2,32  |
| 0,56   | 1,87 | 1,49  |
| -5,76  | 1,92 | 4,95  |
| -4,00  | 2,55 | 2,35  |
| -0,52  | 1,76 | 1,80  |
| -6,37  | 1,37 | 16,60 |
| -0,84  | 1,67 | 1,55  |
| -7,27  | 0,99 | 2,35  |
| 0,21   | 0,92 | 1,42  |
| 0,25   | 1,53 | 2,07  |
| -3,24  | 0,78 | 1,85  |
| -2,08  | NAN  | 1,48  |
| -1,04  | 2,08 | 9,00  |
| -0,08  | 9,71 | 2,02  |
| -2,81  | 1,86 | 2,16  |
| -0,41  | 1,05 | 2,69  |
| -4,30  | 1,32 | 1,60  |
| -3,33  | 1,00 | 2,77  |
| -2,16  | 1,32 | 1,56  |
| -0,29  | 1,23 | 1,49  |
| -0,03  | 2,28 | 8,16  |

|       |      |      |
|-------|------|------|
| 0,54  | 1,97 | 2,67 |
| -2,85 | 1,96 | 3,06 |
| -0,38 | 3,31 | 4,03 |
| 0,49  | 1,12 | 1,64 |
| -0,21 | 1,90 | 2,52 |
| -0,70 | 0,85 | 1,19 |
| -3,74 | 2,39 | 4,36 |
| -3,81 | 0,81 | 2,75 |
| -2,13 | 1,05 | 1,48 |
| -0,81 | 2,58 | 7,87 |
| -0,69 | 2,37 | 2,70 |
| -2,67 | 0,77 | 2,25 |
| NAN   | 0,91 | NAN  |
| -1,59 | 1,83 | 2,82 |
| -2,22 | 1,40 | 1,42 |
| -6,54 | 0,98 | 4,03 |

| HOMA-IR increase 24 gw | HOMA-IR change 24 gw |
|------------------------|----------------------|
| -0,66                  | -1,15                |
| -0,08                  | -0,05                |
| -0,15                  | -0,12                |
| -2,34                  | -1,22                |
| 2,96                   | 0,50                 |
| 18,44                  | 0,81                 |
| -0,57                  | -0,85                |
| -0,26                  | -0,18                |
| 1,50                   | 0,41                 |
| 2,02                   | 0,40                 |
| -0,01                  | 0,00                 |
| 1,75                   | 0,45                 |
| -0,54                  | -0,81                |
| 3,45                   | 0,55                 |
| -0,14                  | -0,09                |
| -0,86                  | -0,98                |
| 0,68                   | 0,26                 |
| -0,74                  | -0,28                |
| -0,65                  | -0,95                |
| -0,53                  | -0,23                |
| -1,20                  | -1,15                |
| -1,57                  | -0,94                |
| -2,59                  | -1,51                |
| -0,13                  | -0,15                |
| -1,96                  | -1,10                |
| -1,57                  | -2,50                |
| -1,59                  | -2,22                |
| -0,03                  | -0,02                |
| -2,63                  | -1,42                |
| -2,79                  | -1,49                |
| -0,81                  | -0,42                |
| -0,18                  | -0,14                |
| -3,92                  | -6,49                |
| -1,49                  | -1,27                |
| 2,28                   | 0,62                 |
| 0,26                   | 0,11                 |
| -0,54                  | -0,89                |
| 0,03                   | 0,01                 |
| -1,91                  | -0,96                |
| 8,95                   | 0,83                 |
| -1,07                  | -0,50                |
| -2,53                  | -1,42                |
| -0,70                  | -0,41                |
| 1,74                   | 0,52                 |
| -1,28                  | -1,34                |
| 2,48                   | 0,58                 |
| 0,12                   | 0,05                 |



|        |        |
|--------|--------|
| -0,79  | -1,15  |
| 3,82   | 0,63   |
| -0,76  | -0,30  |
| -0,52  | -0,22  |
| -0,07  | -0,05  |
| -5,08  | -5,24  |
| 2,90   | 0,52   |
| NAN    | NAN    |
| -1,06  | -0,50  |
| 6,12   | 0,84   |
| 8,04   | 0,64   |
| 6,40   | 0,77   |
| -1,78  | -1,24  |
| 1,32   | 0,39   |
| 15,41  | 0,71   |
| NAN    | NAN    |
| -1,83  | -1,74  |
| 5,41   | 0,72   |
| 4,53   | 0,63   |
| -0,90  | -0,55  |
| 1,82   | 0,51   |
| -1,48  | -1,40  |
| NAN    | NAN    |
| -0,79  | -1,23  |
| 11,05  | 0,76   |
| -10,17 | -16,16 |
| 5,20   | 0,66   |
| -0,41  | -0,12  |
| -0,70  | -0,51  |
| -0,95  | -1,12  |
| -0,44  | -0,41  |
| -0,96  | -1,54  |
| -2,45  | -2,27  |
| -0,84  | -1,12  |
| -1,36  | -2,83  |
| 2,34   | 0,36   |
| 1,21   | 0,41   |
| -0,11  | -0,06  |
| 1,31   | 0,37   |
| -1,59  | -3,10  |
| 6,33   | 0,76   |
| -3,12  | -1,45  |
| -0,31  | -0,11  |
| -0,77  | -1,25  |
| -0,25  | -0,21  |
| 5,46   | 0,71   |
| -10,83 | -20,31 |
| -1,37  | -1,21  |
| 2,64   | 0,41   |
| 0,22   | 0,16   |

|        |        |
|--------|--------|
| -1,12  | -1,57  |
| -1,57  | -1,21  |
| 4,83   | 0,79   |
| -16,74 | -8,10  |
| 3,27   | 0,48   |
| -2,43  | -3,70  |
| 1,24   | 0,31   |
| 5,49   | 0,75   |
| 8,48   | 0,73   |
| 2,39   | 0,63   |
| -0,78  | -0,70  |
| -0,27  | -0,18  |
| -0,38  | -0,63  |
| -0,27  | -0,24  |
| -2,21  | -0,98  |
| -2,72  | -1,92  |
| -0,04  | -0,02  |
| 1,16   | 0,42   |
| -1,26  | -1,78  |
| -1,77  | -2,13  |
| 3,75   | 0,77   |
| 2,65   | 0,56   |
| 15,58  | 0,82   |
| -1,30  | -1,22  |
| -2,87  | -1,24  |
| -0,63  | -0,58  |
| 9,80   | 0,80   |
| -1,62  | -1,76  |
| -1,04  | -0,30  |
| 1,02   | 0,38   |
| -13,82 | -2,93  |
| NAN    | NAN    |
| -0,31  | -0,57  |
| -0,79  | -0,55  |
| 12,60  | 0,73   |
| 2,93   | 0,47   |
| -4,35  | -3,57  |
| -0,60  | -0,45  |
| -12,42 | -9,89  |
| -0,84  | -0,55  |
| -27,45 | -40,21 |
| -2,46  | -1,48  |
| 8,34   | 0,67   |
| -1,50  | -2,47  |
| 5,74   | 0,65   |
| -0,88  | -1,36  |
| -1,03  | -1,76  |
| -1,67  | -2,06  |
| -0,39  | -0,28  |
| -1,29  | -0,63  |

|        |        |
|--------|--------|
| 0,87   | 0,32   |
| -1,51  | -0,55  |
| -1,39  | -2,18  |
| 0,78   | 0,21   |
| 2,68   | 0,58   |
| -0,24  | -0,20  |
| 10,97  | 0,83   |
| 1,12   | 0,33   |
| 2,02   | 0,42   |
| -0,15  | -0,23  |
| -0,23  | -0,41  |
| 2,93   | 0,62   |
| -0,99  | -1,27  |
| 2,08   | 0,57   |
| -0,75  | -0,78  |
| -1,68  | -0,71  |
| -0,56  | -0,34  |
| -0,83  | -1,01  |
| 2,08   | 0,31   |
| -0,30  | -0,30  |
| 1,84   | 0,43   |
| 7,37   | 0,87   |
| -2,44  | -0,91  |
| 8,34   | 0,82   |
| -2,86  | -3,87  |
| -1,59  | -2,39  |
| 2,69   | 0,68   |
| -12,37 | -11,01 |
| -1,15  | -0,57  |
| 2,75   | 0,75   |
| -0,97  | -1,70  |
| 0,19   | 0,10   |
| -1,14  | -0,96  |
| -0,23  | -0,20  |
| 4,76   | 0,63   |
| -1,25  | -1,02  |
| -1,97  | -2,00  |
| -0,15  | -0,10  |
| 9,45   | 0,83   |
| -0,28  | -0,15  |
| 6,52   | 0,79   |
| -1,14  | -1,34  |
| -0,58  | -0,95  |
| 0,47   | 0,24   |
| 7,48   | 0,76   |
| 8,85   | 0,79   |
| -0,30  | -0,28  |
| -1,24  | -1,39  |
| 2,12   | 0,63   |
| 2,08   | 0,53   |

|       |       |
|-------|-------|
| -1,65 | -1,10 |
| 4,77  | 0,71  |
| 1,75  | 0,52  |
| -0,75 | -0,40 |
| 4,51  | 0,81  |
| -1,14 | -0,98 |
| -1,20 | -2,24 |
| -0,55 | -0,36 |
| 0,00  | 0,00  |
| -0,61 | -0,53 |
| -0,06 | -0,06 |
| 0,43  | 0,19  |
| 0,73  | 0,40  |
| -0,80 | -0,28 |
| 0,82  | 0,07  |
| -2,15 | -3,06 |
| 1,92  | 0,46  |
| -1,05 | -1,11 |
| 2,63  | 0,70  |
| -5,38 | -2,14 |
| -1,85 | -1,35 |
| 5,28  | 0,67  |
| -0,93 | -1,32 |
| 8,42  | 0,82  |
| 0,69  | 0,36  |
| -1,37 | -1,03 |
| -1,06 | -0,94 |
| 0,10  | 0,07  |
| -1,32 | -1,46 |
| 1,91  | 0,48  |
| -3,77 | -5,84 |
| -0,89 | -0,91 |
| -0,99 | -0,96 |
| 1,83  | 0,53  |
| 4,66  | 0,69  |
| -1,49 | -0,91 |
| -0,39 | -0,31 |
| 5,45  | 0,81  |
| 0,61  | 0,30  |
| 0,42  | 0,20  |
| -5,58 | -5,99 |
| -1,26 | -1,21 |
| -0,79 | -1,02 |
| -1,40 | -0,82 |
| -0,09 | -0,12 |
| -0,19 | -0,31 |
| -1,63 | -1,81 |
| 1,69  | 0,36  |
| 5,06  | 0,78  |
| 0,19  | 0,08  |

|       |       |
|-------|-------|
| -1,42 | -1,83 |
| 1,76  | 0,47  |
| -2,29 | -1,33 |
| 1,59  | 0,33  |
| -0,11 | -0,05 |
| 3,68  | 0,72  |
| -0,45 | -0,47 |
| 5,49  | 0,79  |
| 1,47  | 0,55  |
| -0,96 | -1,49 |
| NAN   | NAN   |
| -0,40 | -0,44 |
| -1,34 | -1,83 |
| 1,49  | 0,17  |
| -1,81 | -0,81 |
| -2,06 | -0,69 |
| 1,07  | 0,52  |
| 2,65  | 0,61  |
| -0,21 | -0,28 |
| 4,31  | 0,61  |
| -0,96 | -1,64 |
| -0,36 | -0,18 |
| -2,03 | -2,64 |
| 0,49  | 0,15  |
| 0,80  | 0,18  |
| 0,83  | 0,32  |
| -0,60 | -0,23 |
| -0,14 | -0,11 |
| -5,44 | -7,07 |
| -2,02 | -1,82 |
| 7,11  | 0,79  |
| -0,41 | -0,27 |
| -1,61 | -1,72 |
| 1,09  | 0,38  |
| 4,32  | 0,76  |
| 0,26  | 0,13  |
| -0,41 | -0,71 |
| 2,82  | 0,75  |
| 5,10  | 0,77  |
| 0,18  | 0,18  |
| NAN   | NAN   |
| 8,13  | 0,80  |
| -5,47 | -1,29 |
| -0,82 | -0,78 |
| 3,41  | 0,77  |
| -0,69 | -1,09 |
| 0,34  | 0,25  |
| -0,19 | -0,16 |
| 1,37  | 0,53  |
| 13,29 | 0,85  |

|       |       |
|-------|-------|
| 10,71 | 0,84  |
| -0,13 | -0,07 |
| 4,42  | 0,57  |
| 6,12  | 0,85  |
| 2,67  | 0,58  |
| 0,81  | 0,49  |
| -0,26 | -0,12 |
| 0,43  | 0,35  |
| -0,09 | -0,09 |
| 6,21  | 0,71  |
| 0,92  | 0,28  |
| 0,41  | 0,35  |
| 0,68  | 0,43  |
| 0,55  | 0,23  |
| -0,56 | -0,66 |
| 0,17  | 0,15  |

| HOMA-IR increase 2 yrs PD | HOMA-IR change 2 yrs PD |
|---------------------------|-------------------------|
| -0,63                     | -0,52                   |
| -0,48                     | -0,25                   |
| -1,25                     | -0,51                   |
| -1,00                     | -0,34                   |
| 2,60                      | 0,77                    |
| 20,32                     | 8,55                    |
| -0,48                     | -0,42                   |
| 0,19                      | 0,15                    |
| 2,18                      | 1,48                    |
| -1,07                     | -0,17                   |
| 0,11                      | 0,09                    |
| -5,69                     | -0,59                   |
| -0,10                     | -0,13                   |
| 4,26                      | 2,17                    |
| 0,26                      | 0,20                    |
| -0,82                     | -0,48                   |
| 1,45                      | 1,31                    |
| -6,86                     | -0,72                   |
| -1,05                     | -0,60                   |
| -0,95                     | -0,29                   |
| -0,84                     | -0,45                   |
| -2,28                     | -0,58                   |
| -3,48                     | -0,67                   |
| -0,87                     | -0,51                   |
| -2,21                     | -0,55                   |
| -2,77                     | -0,81                   |
| -1,56                     | -0,69                   |
| -32,75                    | -0,94                   |
| -1,56                     | -0,46                   |
| -0,41                     | -0,18                   |
| -1,58                     | -0,45                   |
| -1,15                     | -0,48                   |
| -1,25                     | -0,67                   |
| -2,28                     | -0,66                   |
| 1,97                      | 1,15                    |
| -4,03                     | -0,63                   |
| -1,39                     | -0,70                   |
| -0,45                     | -0,13                   |
| -2,66                     | -0,57                   |
| 8,93                      | 4,90                    |
| 0,12                      | 0,06                    |
| -1,50                     | -0,46                   |
| -1,01                     | -0,37                   |
| 2,09                      | 1,63                    |
| -1,45                     | -0,60                   |
| 3,18                      | 2,86                    |
| 0,89                      | 0,55                    |

|        |       |
|--------|-------|
| -0,23  | -0,25 |
| -4,64  | -0,43 |
| 0,18   | 0,08  |
| -1,61  | -0,41 |
| -1,64  | -0,53 |
| -2,37  | -0,71 |
| -3,97  | -0,42 |
| -0,42  | -0,27 |
| -0,05  | -0,02 |
| 6,13   | 5,49  |
| 10,46  | 5,04  |
| 6,40   | 3,37  |
| -0,85  | -0,37 |
| 1,67   | 0,97  |
| 18,81  | 6,79  |
| 4,27   | 0,40  |
| -1,80  | -0,63 |
| 6,04   | 4,00  |
| 4,67   | 1,87  |
| -0,69  | -0,29 |
| 1,33   | 0,60  |
| -0,66  | -0,39 |
| -23,96 | -0,95 |
| -0,56  | -0,46 |
| 3,99   | 0,38  |
| -1,12  | -0,64 |
| 5,91   | 3,08  |
| -1,10  | -0,25 |
| -1,13  | -0,45 |
| -0,76  | -0,47 |
| -1,47  | -0,58 |
| -1,28  | -0,67 |
| -2,12  | -0,66 |
| -0,56  | -0,43 |
| -1,39  | -0,74 |
| 3,90   | 1,55  |
| 0,72   | 0,32  |
| -3,05  | -0,61 |
| 0,54   | 0,18  |
| -1,65  | -0,76 |
| 7,03   | 5,33  |
| -1,66  | -0,44 |
| -0,57  | -0,17 |
| -0,73  | -0,54 |
| -0,30  | -0,21 |
| 5,37   | 2,28  |
| -1,33  | -0,71 |
| 0,28   | 0,33  |
| 4,05   | 1,71  |
| -0,11  | -0,07 |



|        |       |
|--------|-------|
| -0,72  | -0,50 |
| -1,55  | -0,54 |
| 4,71   | 3,46  |
| -4,75  | -0,70 |
| 4,97   | 2,69  |
| -6,86  | -0,91 |
| 0,71   | 0,22  |
| 5,53   | 3,16  |
| 8,63   | 2,92  |
| NAN    | NAN   |
| -1,23  | -0,52 |
| -1,75  | -0,54 |
| -0,61  | -0,50 |
| -4,34  | -0,79 |
| -8,54  | -0,79 |
| -0,75  | -0,35 |
| NAN    | NAN   |
| 1,87   | 2,19  |
| -2,35  | -0,77 |
| -4,72  | -0,85 |
| 4,22   | 6,84  |
| 2,53   | 1,14  |
| 16,18  | 5,89  |
| -0,24  | -0,18 |
| -0,43  | -0,16 |
| -2,56  | -0,70 |
| 10,28  | 5,26  |
| -0,72  | -0,44 |
| -12,99 | -0,79 |
| 0,92   | 0,52  |
| 1,13   | 0,31  |
| NAN    | NAN   |
| -1,19  | -0,68 |
| -1,11  | -0,44 |
| -19,31 | -0,53 |
| 4,53   | 2,72  |
| -11,88 | -0,91 |
| -6,62  | -0,83 |
| -1,77  | -0,58 |
| -0,54  | -0,26 |
| -1,03  | -0,60 |
| -3,61  | -0,69 |
| 9,86   | 3,95  |
| -9,70  | -0,94 |
| 7,01   | 3,84  |
| -0,55  | -0,46 |
| -1,19  | -0,67 |
| -0,87  | -0,52 |
| -0,65  | -0,32 |
| 0,02   | 0,01  |

|       |       |
|-------|-------|
| 0,63  | 0,31  |
| 0,92  | 0,51  |
| -0,50 | -0,44 |
| 0,95  | 0,34  |
| 3,59  | 3,44  |
| -0,28 | -0,19 |
| 12,07 | 10,19 |
| 1,38  | 0,70  |
| 3,10  | 1,82  |
| -0,82 | -0,55 |
| NAN   | NAN   |
| 3,43  | 2,71  |
| -0,74 | -0,49 |
| 2,20  | 1,51  |
| -1,40 | -0,59 |
| 0,05  | 0,02  |
| -8,41 | -0,84 |
| -1,07 | -0,57 |
| 3,92  | 1,37  |
| -0,84 | -0,46 |
| -7,74 | -0,64 |
| 6,82  | 4,02  |
| -1,95 | -0,42 |
| 8,75  | 6,05  |
| -7,00 | -0,90 |
| -1,17 | -0,64 |
| 3,05  | 3,37  |
| -2,10 | -0,65 |
| -0,37 | -0,15 |
| 2,88  | 3,64  |
| -0,53 | -0,48 |
| -0,23 | -0,11 |
| -0,24 | -0,17 |
| -1,76 | -0,61 |
| -9,09 | -0,55 |
| -0,89 | -0,42 |
| -2,18 | -0,69 |
| -0,38 | -0,21 |
| 9,53  | 5,14  |
| -1,46 | -0,45 |
| 6,23  | 3,07  |
| -1,24 | -0,59 |
| -0,70 | -0,53 |
| 0,99  | 1,03  |
| 7,04  | 2,46  |
| 9,28  | 4,91  |
| -0,09 | -0,08 |
| -0,83 | -0,48 |
| 2,30  | 2,22  |
| 1,95  | 0,99  |

|       |       |
|-------|-------|
| -7,80 | -0,84 |
| 4,66  | 2,26  |
| 1,64  | 0,96  |
| -0,84 | -0,31 |
| 3,77  | 2,07  |
| -2,45 | -0,68 |
| -0,66 | -0,55 |
| -1,07 | -0,41 |
| -2,45 | -0,69 |
| -0,66 | -0,37 |
| -0,29 | -0,21 |
| 0,39  | 0,21  |
| 1,16  | 1,81  |
| -1,11 | -0,28 |
| 9,63  | 7,17  |
| -2,07 | -0,75 |
| 2,18  | 1,12  |
| -0,25 | -0,21 |
| 1,62  | 0,77  |
| 0,93  | 0,59  |
| -0,42 | -0,24 |
| 5,49  | 2,27  |
| -0,88 | -0,56 |
| 9,10  | 7,91  |
| -0,55 | -0,23 |
| -3,63 | -0,73 |
| -0,76 | -0,40 |
| -1,08 | -0,42 |
| -0,95 | -0,51 |
| 2,54  | 1,79  |
| -1,54 | -0,70 |
| -0,69 | -0,41 |
| -1,97 | -0,66 |
| 0,57  | 0,20  |
| 4,80  | 2,48  |
| -1,90 | -0,54 |
| 0,28  | 0,29  |
| 5,50  | 4,44  |
| -1,89 | -0,48 |
| -0,48 | -0,18 |
| -1,04 | -0,53 |
| -0,83 | -0,45 |
| -1,20 | -0,61 |
| -0,01 | 0,00  |
| -0,16 | -0,17 |
| -1,11 | -0,64 |
| -0,76 | -0,46 |
| 1,63  | 0,53  |
| 5,66  | 6,83  |
| 0,18  | 0,08  |

|        |       |
|--------|-------|
| -1,07  | -0,58 |
| 2,45   | 1,93  |
| -6,53  | -0,79 |
| 0,42   | 0,10  |
| -0,75  | -0,24 |
| 3,77   | 2,82  |
| -0,62  | -0,39 |
| 1,97   | 0,39  |
| 0,98   | 0,57  |
| -1,44  | -0,69 |
| -0,69  | -0,33 |
| -1,52  | -0,62 |
| -1,15  | -0,61 |
| 6,78   | 3,89  |
| -1,00  | -0,31 |
| -1,73  | -0,37 |
| -0,36  | -0,15 |
| 3,12   | 2,53  |
| -0,85  | -0,53 |
| 5,21   | 2,82  |
| -0,71  | -0,55 |
| -0,04  | -0,02 |
| -5,18  | -0,87 |
| 1,12   | 0,54  |
| 1,43   | 0,49  |
| 1,44   | 1,28  |
| -28,20 | -0,92 |
| -0,70  | -0,36 |
| -0,27  | -0,26 |
| -1,22  | -0,52 |
| 7,49   | 5,02  |
| -3,44  | -0,69 |
| -1,41  | -0,60 |
| 1,06   | 0,59  |
| -10,91 | -0,66 |
| 0,38   | 0,24  |
| -1,77  | -0,75 |
| 2,32   | 1,63  |
| 4,56   | 2,20  |
| -0,89  | -0,48 |
| -0,54  | -0,36 |
| 1,21   | 0,13  |
| 2,22   | 1,10  |
| -1,11  | -0,52 |
| 1,77   | 0,66  |
| -0,97  | -0,61 |
| -1,42  | -0,51 |
| -0,43  | -0,27 |
| 1,12   | 0,75  |
| 7,42   | 0,91  |

|       |       |
|-------|-------|
| 10,01 | 3,75  |
| -1,24 | -0,40 |
| 3,71  | 0,92  |
| 5,60  | 3,42  |
| 2,04  | 0,81  |
| 0,47  | 0,39  |
| -2,22 | -0,51 |
| -1,51 | -0,55 |
| -0,52 | -0,35 |
| 0,92  | 0,12  |
| 0,59  | 0,22  |
| -1,07 | -0,48 |
| NAN   | NAN   |
| -0,44 | -0,16 |
| -0,57 | -0,40 |
| -2,88 | -0,72 |

| Adiponectin (mcg/mL) 24 gw | Adiponectin (mcg/mL) 2 yrs. PD |
|----------------------------|--------------------------------|
| 18,11                      | 15,80                          |
| 12,14                      | 11,99                          |
| 18,07                      | 12,98                          |
| 15,42                      | 17,95                          |
| 22,42                      | 12,60                          |
| 14,46                      | 15,93                          |
| 14,57                      | 10,10                          |
| 10,02                      | 5,42                           |
| 20,33                      | 14,55                          |
| 14,89                      | 9,40                           |
| 21,44                      | 26,57                          |
| 54,62                      | 14,88                          |
| 14,50                      | 9,66                           |
| 23,04                      | 10,80                          |
| 17,70                      | 23,31                          |
| 42,82                      | 26,46                          |
| 16,18                      | 22,82                          |
| 14,74                      | 10,98                          |
| 29,11                      | 30,97                          |
| 4,42                       | 3,46                           |
| 25,10                      | 29,90                          |
| 20,65                      | 16,31                          |
| 20,57                      | 24,16                          |
| 24,79                      | 19,63                          |
| 23,86                      | 15,23                          |
| 29,41                      | 21,01                          |
| 23,69                      | 30,30                          |
| 32,63                      | 17,86                          |
| 30,72                      | 31,49                          |
| 19,83                      | 10,25                          |
| 5,55                       | 7,86                           |
| 21,98                      | 13,64                          |
| 19,74                      | 9,43                           |
| 11,43                      | 23,58                          |
| 13,07                      | 20,59                          |
| 23,04                      | 19,30                          |
| 38,18                      | 36,45                          |
| 9,94                       | 8,69                           |
| 6,93                       | 7,18                           |
| 16,98                      | 9,44                           |
| 6,49                       | 9,02                           |
| 25,28                      | 15,49                          |
| 19,07                      | 18,18                          |
| 18,51                      | 19,65                          |
| 34,93                      | 20,77                          |
| 31,36                      | 28,52                          |
| 23,88                      | 21,96                          |

|       |       |
|-------|-------|
| 23,91 | 34,59 |
| 35,06 | 26,10 |
| 24,81 | 28,51 |
| 22,27 | 15,73 |
| 18,20 | 18,36 |
| 10,92 | 10,99 |
| 20,69 | 23,11 |
| NAN   | NAN   |
| 22,80 | 12,08 |
| 31,31 | 24,11 |
| 18,56 | 35,52 |
| 28,69 | 22,12 |
| 27,77 | 28,14 |
| 13,83 | 20,12 |
| 15,23 | 17,87 |
| NAN   | NAN   |
| 20,14 | 15,32 |
| 26,79 | 21,82 |
| 10,33 | 5,29  |
| 15,58 | 18,05 |
| 10,19 | 8,50  |
| 32,56 | 16,53 |
| 7,53  | 6,96  |
| 20,53 | 16,29 |
| 12,08 | 11,54 |
| 16,57 | 17,75 |
| 12,33 | 15,18 |
| 9,33  | 11,89 |
| 19,99 | 13,87 |
| 17,32 | 20,86 |
| 19,85 | 17,27 |
| 17,40 | 24,40 |
| 18,49 | 14,17 |
| 28,63 | 21,07 |
| 21,60 | 29,57 |
| 11,77 | 9,65  |
| 24,73 | 27,79 |
| 5,97  | 9,04  |
| 16,01 | 16,20 |
| 14,46 | 11,46 |
| 19,83 | 22,94 |
| 16,76 | 23,71 |
| 2,30  | 7,08  |
| 24,72 | 22,93 |
| 30,91 | 26,51 |
| 6,69  | 9,08  |
| 23,74 | 38,92 |
| 14,40 | 22,39 |
| 8,06  | 9,08  |
| 8,97  | 17,01 |

|       |       |
|-------|-------|
| 20,81 | 19,10 |
| 13,26 | 19,75 |
| 3,10  | 3,90  |
| 8,31  | 8,72  |
| 13,05 | 15,14 |
| 12,92 | 25,32 |
| 22,34 | 28,12 |
| 16,66 | 21,09 |
| 13,82 | 15,25 |
| NAN   | NAN   |
| 32,58 | 17,42 |
| 5,02  | 4,37  |
| 14,34 | 10,42 |
| 39,62 | 35,23 |
| 12,71 | 16,16 |
| 21,43 | 23,07 |
| NAN   | NAN   |
| 15,72 | 17,94 |
| 8,57  | 11,92 |
| 17,42 | 14,13 |
| 15,35 | 15,70 |
| 16,87 | 15,84 |
| 12,67 | 16,94 |
| 13,74 | 32,57 |
| 11,76 | 11,14 |
| 14,35 | 14,40 |
| 15,13 | 11,79 |
| 15,53 | 21,19 |
| 14,63 | 8,40  |
| 21,89 | 39,63 |
| 11,93 | 20,07 |
| 9,52  | 9,01  |
| 14,71 | 15,12 |
| 21,89 | 15,03 |
| 7,35  | 9,47  |
| 17,71 | 18,33 |
| 11,31 | 9,41  |
| 11,73 | 14,92 |
| 14,17 | 12,89 |
| 16,17 | 12,77 |
| 12,71 | 14,37 |
| 6,97  | 9,38  |
| 8,99  | 8,18  |
| 12,45 | 9,51  |
| NAN   | NAN   |
| 16,34 | 14,83 |
| 16,32 | 19,69 |
| 10,52 | 12,14 |
| 16,93 | 10,36 |
| 9,16  | 10,25 |



|       |       |
|-------|-------|
| 9,54  | 9,67  |
| 11,76 | 7,65  |
| 13,80 | 15,60 |
| 14,57 | 13,54 |
| 12,09 | 17,63 |
| 9,89  | 18,44 |
| 21,36 | 14,39 |
| 23,38 | 15,41 |
| 17,44 | 17,30 |
| 21,31 | 21,38 |
| 17,83 | 18,31 |
| 18,47 | 18,30 |
| 41,68 | 22,84 |
| 9,29  | 12,29 |
| 18,08 | 13,47 |
| 9,88  | 17,21 |
| 14,92 | 13,64 |
| 12,47 | 10,83 |
| 8,15  | 8,28  |
| 24,97 | 20,11 |
| 17,23 | 24,78 |
| 14,06 | 22,71 |
| 10,50 | 9,32  |
| 16,50 | 22,09 |
| 11,70 | 14,74 |
| 27,33 | 27,05 |
| 18,08 | 15,17 |
| 16,33 | 11,47 |
| 9,64  | 8,28  |
| 13,86 | 15,81 |
| 13,30 | 26,47 |
| 23,22 | 19,68 |
| 22,11 | 21,80 |
| 11,20 | 11,55 |
| 9,46  | 14,14 |
| 15,53 | 18,18 |
| 13,94 | 19,00 |
| 9,22  | 12,19 |
| 10,83 | 16,94 |
| 18,35 | 16,07 |
| 28,72 | 20,44 |
| 16,13 | 6,27  |
| 13,88 | 18,77 |
| 14,14 | 18,23 |
| 10,68 | 9,43  |
| 12,03 | 11,19 |
| 16,48 | 15,53 |
| 18,28 | 9,82  |
| 27,83 | 18,97 |
| 16,55 | 16,86 |

[illegible]

[illegible]

[illegible]

| Adiponectin increase 24 gw | Adiponectin increase 2 yrs. PD |
|----------------------------|--------------------------------|
| 5,29                       | 7,60                           |
| -6,99                      | -6,84                          |
| 2,30                       | 7,39                           |
| 11,01                      | 8,48                           |
| 1,73                       | 11,55                          |
| 4,64                       | 3,17                           |
| -2,56                      | 1,91                           |
| -2,46                      | 2,14                           |
| -0,94                      | 4,84                           |
| 5,83                       | 11,32                          |
| 5,29                       | 0,16                           |
| -21,09                     | 18,65                          |
| 0,31                       | 5,15                           |
| -8,22                      | 4,02                           |
| 10,71                      | 5,10                           |
| -7,77                      | 8,59                           |
| 9,77                       | 3,13                           |
| -0,63                      | 3,13                           |
| 5,83                       | 3,97                           |
| 2,00                       | 2,96                           |
| 3,98                       | -0,82                          |
| 5,78                       | 10,12                          |
| 1,32                       | -2,27                          |
| 5,94                       | 11,10                          |
| 4,23                       | 12,86                          |
| -7,24                      | 1,16                           |
| 3,66                       | -2,95                          |
| 14,14                      | 28,91                          |
| 12,35                      | 11,58                          |
| 7,55                       | 17,13                          |
| 3,52                       | 1,21                           |
| -1,29                      | 7,05                           |
| 7,10                       | 17,41                          |
| 6,81                       | -5,34                          |
| 3,73                       | -3,79                          |
| 5,86                       | 9,60                           |
| -2,96                      | -1,23                          |
| 1,38                       | 2,63                           |
| 0,24                       | -0,01                          |
| -0,77                      | 6,77                           |
| -0,35                      | -2,88                          |
| -7,13                      | 2,66                           |
| 0,34                       | 1,23                           |
| -4,32                      | -5,46                          |
| -0,71                      | 13,45                          |
| -14,26                     | -11,42                         |
| 7,16                       | 9,08                           |

|       |        |
|-------|--------|
| 6,54  | -4,14  |
| -4,05 | 4,91   |
| -4,38 | -8,08  |
| 5,42  | 11,96  |
| -5,01 | -5,17  |
| 10,68 | 10,61  |
| 16,91 | 14,49  |
| NAN   | NAN    |
| -2,37 | 8,35   |
| -5,04 | 2,16   |
| 2,74  | -14,22 |
| 9,43  | 16,00  |
| NAN   | NAN    |
| -0,65 | -6,94  |
| 3,05  | 0,41   |
| NAN   | NAN    |
| -8,42 | -3,60  |
| -0,82 | 4,15   |
| 0,21  | 5,25   |
| 5,41  | 2,94   |
| 1,31  | 3,00   |
| 5,35  | 21,38  |
| 4,32  | 4,89   |
| 6,59  | 10,83  |
| 0,03  | 0,57   |
| 9,90  | 8,72   |
| 7,43  | 4,58   |
| 22,10 | 19,54  |
| -1,86 | 4,26   |
| 16,41 | 12,87  |
| 5,65  | 8,23   |
| 9,06  | 2,06   |
| 3,10  | 7,42   |
| -5,80 | 1,76   |
| 11,97 | 4,00   |
| 7,60  | 9,72   |
| 9,16  | 6,10   |
| -0,55 | -3,62  |
| -6,39 | -6,58  |
| -0,36 | 2,64   |
| 9,01  | 5,90   |
| 1,54  | -5,41  |
| 8,37  | 3,59   |
| 6,51  | 8,30   |
| -1,75 | 2,65   |
| 3,59  | 1,20   |
| -4,26 | -19,44 |
| 13,39 | 5,40   |
| 5,17  | 4,15   |
| 10,73 | 2,69   |

|       |        |
|-------|--------|
| 2,41  | 4,12   |
| 7,50  | 1,01   |
| 19,70 | 18,90  |
| 20,84 | 20,43  |
| 4,83  | 2,74   |
| 6,71  | -5,69  |
| -0,76 | -6,54  |
| -1,69 | -6,12  |
| 2,66  | 1,23   |
| NAN   | NAN    |
| -7,37 | 7,79   |
| 2,11  | 2,76   |
| 4,39  | 8,31   |
| -6,44 | -2,05  |
| -1,17 | -4,62  |
| 4,91  | 3,27   |
| NAN   | NAN    |
| 13,23 | 11,01  |
| 2,73  | -0,62  |
| -0,78 | 2,51   |
| 6,05  | 5,70   |
| 0,26  | 1,29   |
| 17,18 | 12,91  |
| 32,55 | 13,72  |
| -2,23 | -1,61  |
| 4,40  | 4,35   |
| 1,28  | 4,62   |
| 6,15  | 0,49   |
| -0,01 | 6,22   |
| 0,39  | -17,35 |
| 5,91  | -2,23  |
| 32,88 | 33,39  |
| 0,10  | -0,31  |
| -7,48 | -0,62  |
| 3,71  | 1,59   |
| -4,81 | -5,43  |
| -1,11 | 0,79   |
| -4,62 | -7,81  |
| 0,47  | 1,75   |
| -0,32 | 3,08   |
| 7,50  | 5,84   |
| 1,70  | -0,71  |
| -1,56 | -0,75  |
| 2,79  | 5,73   |
| NAN   | NAN    |
| 4,38  | 5,89   |
| 8,07  | 4,70   |
| 1,13  | -0,49  |
| -1,03 | 5,54   |
| 2,21  | 1,12   |

|        |        |
|--------|--------|
| 5,78   | 5,65   |
| 2,34   | 6,45   |
| -1,39  | -3,19  |
| 8,92   | 9,95   |
| 15,59  | 10,05  |
| 4,31   | -4,24  |
| 6,58   | 13,55  |
| -14,90 | -6,93  |
| 3,33   | 3,47   |
| 4,28   | 4,21   |
| 0,19   | -0,29  |
| 2,32   | 2,49   |
| 2,25   | 21,09  |
| 4,15   | 1,15   |
| 4,32   | 8,93   |
| 4,35   | -2,98  |
| 3,86   | 5,14   |
| 3,94   | 5,58   |
| 4,41   | 4,28   |
| 6,60   | 11,46  |
| -0,28  | -7,83  |
| 10,13  | 1,48   |
| 3,72   | 4,90   |
| 1,23   | -4,36  |
| 6,07   | 3,03   |
| -17,66 | -17,38 |
| 13,32  | 16,23  |
| 2,32   | 7,18   |
| 3,21   | 4,57   |
| 2,14   | 0,19   |
| 27,84  | 14,67  |
| -5,32  | -1,78  |
| 0,47   | 0,78   |
| 1,34   | 0,99   |
| 6,34   | 1,66   |
| 9,34   | 6,69   |
| 5,00   | -0,06  |
| 2,23   | -0,74  |
| 2,01   | -4,10  |
| -2,85  | -0,57  |
| -3,78  | 4,50   |
| -9,26  | 0,60   |
| 7,37   | 2,48   |
| 2,71   | -1,38  |
| 0,91   | 2,16   |
| 0,01   | 0,85   |
| 0,17   | 1,12   |
| -6,51  | 1,95   |
| -5,46  | 3,40   |
| 2,31   | 2,00   |



[illegible]

[illegible]

[illegible]

| Adiponectin change 24 gw | Adiponectin change 2 yrs PD | IL-6 (pg/mL) 24 gw | IL-6 (pg/mL)<br>2 Yrs PD |
|--------------------------|-----------------------------|--------------------|--------------------------|
| 0,23                     | 0,32                        | 3,25               | 2,17                     |
| -1,36                    | -1,33                       | 3,78               | 2,98                     |
| 0,11                     | 0,36                        | 11,36              | 6,19                     |
| 0,42                     | 0,32                        | 1,90               | 3,11                     |
| 0,07                     | 0,48                        | 3,51               | 3,52                     |
| 0,24                     | 0,17                        | 5,59               | 9,11                     |
| -0,21                    | 0,16                        | 1,03               | 0,87                     |
| -0,33                    | 0,28                        | 1,97               | 2,78                     |
| -0,05                    | 0,25                        | 2,31               | 2,31                     |
| 0,28                     | 0,55                        | 2,71               | 3,72                     |
| 0,20                     | 0,01                        | 1,90               | 2,84                     |
| -0,63                    | 0,56                        | 2,84               | 1,70                     |
| 0,02                     | 0,35                        | 2,24               | 2,44                     |
| -0,55                    | 0,27                        | 2,31               | 1,90                     |
| 0,38                     | 0,18                        | 2,14               | 1,60                     |
| -0,22                    | 0,25                        | 11,85              | 7,85                     |
| 0,38                     | 0,12                        | 7,04               | 10,21                    |
| -0,04                    | 0,22                        | 9,93               | 16,22                    |
| 0,17                     | 0,11                        | 3,31               | 3,61                     |
| 0,31                     | 0,46                        | 3,51               | 2,14                     |
| 0,14                     | -0,03                       | 17,22              | 5,16                     |
| 0,22                     | 0,38                        | 8,08               | 11,14                    |
| 0,06                     | -0,10                       | 4,12               | 6,00                     |
| 0,19                     | 0,36                        | 13,10              | 5,58                     |
| 0,15                     | 0,46                        | 4,95               | 5,79                     |
| -0,33                    | 0,05                        | 4,95               | 13,67                    |
| 0,13                     | -0,11                       | 2,62               | 4,33                     |
| 0,30                     | 0,62                        | 3,51               | 2,14                     |
| 0,29                     | 0,27                        | 2,56               | 3,06                     |
| 0,28                     | 0,63                        | 7,79               | 1,87                     |
| 0,39                     | 0,13                        | 9,02               | 21,07                    |
| -0,06                    | 0,34                        | 7,67               | 2,53                     |
| 0,26                     | 0,65                        | 1,61               | 3,25                     |
| 0,37                     | -0,29                       | 13,74              | 2,96                     |
| 0,22                     | -0,23                       | 1,88               | 2,96                     |
| 0,20                     | 0,33                        | 2,21               | 2,63                     |
| -0,08                    | -0,03                       | 5,91               | 6,80                     |
| 0,12                     | 0,23                        | 8,45               | 7,77                     |
| 0,03                     | 0,00                        | 3,27               | 5,21                     |
| -0,05                    | 0,42                        | 12,51              | 2,74                     |
| -0,06                    | -0,47                       | 2,10               | 1,35                     |
| -0,39                    | 0,15                        | 7,04               | 10,86                    |
| 0,02                     | 0,06                        | 0,01               | 8,45                     |
| -0,30                    | -0,38                       | 1,88               | 1,35                     |
| -0,02                    | 0,39                        | 0,01               | 0,01                     |
| -0,83                    | -0,67                       | 1,35               | 1,54                     |
| 0,23                     | 0,29                        | 39,67              | 31,01                    |

|       |       |       |       |
|-------|-------|-------|-------|
| 0,21  | -0,14 | 2,93  | 1,92  |
| -0,13 | 0,16  | 3,15  | 6,23  |
| -0,21 | -0,40 | 21,25 | 1,45  |
| 0,20  | 0,43  | 3,00  | 2,31  |
| -0,38 | -0,39 | 0,01  | 0,01  |
| 0,49  | 0,49  | 12,11 | 10,32 |
| 0,45  | 0,39  | 2,16  | 3,15  |
| NAN   | NAN   | NAN   | NAN   |
| -0,12 | 0,41  | 8,17  | 9,19  |
| -0,19 | 0,08  | 1,53  | 10,39 |
| 0,13  | -0,67 | 1,29  | 5,81  |
| 0,25  | 0,42  | 2,24  | 3,00  |
| NAN   | NAN   | 11,50 | 1,45  |
| -0,05 | -0,53 | 7,37  | 2,56  |
| 0,17  | 0,02  | 1,13  | 2,89  |
| NAN   | NAN   | NAN   | NAN   |
| -0,72 | -0,31 | 6,52  | 0,01  |
| -0,03 | 0,16  | 2,22  | 2,56  |
| 0,02  | 0,50  | 4,97  | 14,09 |
| 0,26  | 0,14  | 3,55  | 3,31  |
| 0,11  | 0,26  | 13,19 | 5,19  |
| 0,14  | 0,56  | 0,01  | 1,70  |
| 0,36  | 0,41  | 2,65  | 2,81  |
| 0,24  | 0,40  | 4,34  | 11,21 |
| 0,00  | 0,05  | 3,47  | 11,07 |
| 0,37  | 0,33  | 0,01  | 0,01  |
| 0,38  | 0,23  | 0,01  | 0,01  |
| 0,70  | 0,62  | 2,98  | 4,11  |
| -0,10 | 0,23  | 1,87  | 0,93  |
| 0,49  | 0,38  | 1,96  | 8,81  |
| 0,22  | 0,32  | 0,01  | 0,01  |
| 0,34  | 0,08  | 0,01  | 1,70  |
| 0,14  | 0,34  | 1,32  | 3,20  |
| -0,25 | 0,08  | 13,06 | 9,19  |
| 0,36  | 0,12  | 8,87  | 0,87  |
| 0,39  | 0,50  | 8,09  | 7,54  |
| 0,27  | 0,18  | 2,60  | 3,19  |
| -0,10 | -0,67 | 2,31  | 1,66  |
| -0,66 | -0,68 | 1,32  | 4,86  |
| -0,03 | 0,19  | 0,95  | 2,54  |
| 0,31  | 0,20  | 3,49  | 2,31  |
| 0,08  | -0,30 | 2,88  | 4,85  |
| 0,78  | 0,34  | 3,20  | 3,20  |
| 0,21  | 0,27  | 3,38  | 1,68  |
| -0,06 | 0,09  | 3,18  | 0,01  |
| 0,35  | 0,12  | NAN   | NAN   |
| -0,22 | -1,00 | 5,90  | 16,78 |
| 0,48  | 0,19  | 2,88  | 4,27  |
| 0,39  | 0,31  | 10,86 | 12,61 |
| 0,54  | 0,14  | 0,01  | 0,01  |

|       |       |        |        |
|-------|-------|--------|--------|
| 0,10  | 0,18  | 4,66   | 4,66   |
| 0,36  | 0,05  | 3,25   | 2,90   |
| 0,86  | 0,83  | 2,90   | 2,18   |
| 0,71  | 0,70  | 4,93   | 5,64   |
| 0,27  | 0,15  | 2,11   | 0,99   |
| 0,34  | -0,29 | 1,89   | 1,59   |
| -0,04 | -0,30 | 13,60  | 15,17  |
| -0,11 | -0,41 | 0,01   | 0,99   |
| 0,16  | 0,07  | 2,83   | 0,98   |
| NAN   | NAN   | NAN    | NAN    |
| -0,29 | 0,31  | 0,01   | 0,01   |
| 0,30  | 0,39  | 2,04   | 3,86   |
| 0,23  | 0,44  | 10,11  | 13,94  |
| -0,19 | -0,06 | 5,06   | 1,89   |
| -0,10 | -0,40 | 7,23   | 11,42  |
| 0,19  | 0,12  | 1,84   | 2,77   |
| NAN   | NAN   | NAN    | NAN    |
| 0,46  | 0,38  | 2,71   | 14,59  |
| 0,24  | -0,05 | 7,09   | 17,34  |
| -0,05 | 0,15  | 2,41   | 3,18   |
| 0,28  | 0,27  | 107,31 | 198,48 |
| 0,02  | 0,08  | 1,84   | 0,84   |
| 0,58  | 0,43  | 5,14   | 7,49   |
| 0,70  | 0,30  | 4,27   | 4,03   |
| -0,23 | -0,17 | 13,87  | 19,64  |
| 0,23  | 0,23  | 16,92  | 13,23  |
| 0,08  | 0,28  | 4,76   | 7,07   |
| 0,28  | 0,02  | 2,12   | 4,83   |
| 0,00  | 0,43  | 11,12  | 9,50   |
| 0,02  | -0,78 | 8,90   | 10,98  |
| 0,33  | -0,13 | 22,23  | 8,30   |
| 0,78  | 0,79  | 7,54   | 11,94  |
| 0,01  | -0,02 | 7,44   | 0,01   |
| -0,52 | -0,04 | 0,01   | 6,16   |
| 0,34  | 0,14  | 2,81   | 0,96   |
| -0,37 | -0,42 | 0,01   | 7,25   |
| -0,11 | 0,08  | 3,51   | 3,62   |
| -0,65 | -1,10 | 1,95   | 13,33  |
| 0,03  | 0,12  | 2,10   | 2,05   |
| -0,02 | 0,19  | 9,97   | 10,33  |
| 0,37  | 0,29  | 5,34   | 8,49   |
| 0,20  | -0,08 | 4,83   | 12,12  |
| -0,21 | -0,10 | 35,31  | 17,69  |
| 0,18  | 0,38  | 10,43  | 4,28   |
| NAN   | NAN   | 1,08   | 1,87   |
| 0,21  | 0,28  | 10,33  | 8,86   |
| 0,33  | 0,19  | 0,87   | 0,85   |
| 0,10  | -0,04 | 34,36  | 84,28  |
| -0,06 | 0,35  | 7,16   | 7,64   |
| 0,19  | 0,10  | 1,57   | 2,23   |

|       |       |       |       |
|-------|-------|-------|-------|
| 0,38  | 0,37  | 2,36  | 0,87  |
| 0,17  | 0,46  | 15,80 | 36,60 |
| -0,11 | -0,26 | 0,96  | 0,01  |
| 0,38  | 0,42  | 3,94  | 2,35  |
| 0,56  | 0,36  | 2,30  | 1,50  |
| 0,30  | -0,30 | 0,96  | 23,67 |
| 0,24  | 0,48  | 0,96  | 1,02  |
| -1,76 | -0,82 | 0,01  | 0,01  |
| 0,16  | 0,17  | 0,01  | 0,87  |
| 0,17  | 0,16  | 0,01  | 0,01  |
| 0,01  | -0,02 | 0,01  | 1,77  |
| 0,11  | 0,12  | 3,80  | 1,77  |
| 0,05  | 0,48  | 0,01  | 0,01  |
| 0,31  | 0,09  | 0,89  | 0,90  |
| 0,19  | 0,40  | 0,01  | 0,01  |
| 0,31  | -0,21 | 2,55  | 6,37  |
| 0,21  | 0,27  | 1,02  | 0,01  |
| 0,24  | 0,34  | 0,01  | 0,01  |
| 0,35  | 0,34  | 11,67 | 23,71 |
| 0,21  | 0,36  | 3,09  | 2,62  |
| -0,02 | -0,46 | 1,48  | 0,95  |
| 0,42  | 0,06  | 0,87  | 1,42  |
| 0,26  | 0,34  | 1,24  | 1,10  |
| 0,07  | -0,25 | 1,42  | 2,76  |
| 0,34  | 0,17  | 4,07  | 0,01  |
| -1,83 | -1,80 | 0,01  | 4,72  |
| 0,42  | 0,52  | 0,01  | 3,47  |
| 0,12  | 0,38  | 0,01  | 0,01  |
| 0,25  | 0,36  | 0,01  | 0,01  |
| 0,13  | 0,01  | 1,40  | 0,83  |
| 0,68  | 0,36  | 2,75  | 5,00  |
| -0,30 | -0,10 | 0,01  | 9,35  |
| 0,02  | 0,03  | 67,42 | 30,77 |
| 0,11  | 0,08  | 1,34  | 1,47  |
| 0,40  | 0,11  | 8,34  | 26,11 |
| 0,38  | 0,27  | 4,16  | 3,52  |
| 0,26  | 0,00  | 2,52  | 0,01  |
| 0,19  | -0,06 | 1,40  | 2,47  |
| 0,16  | -0,32 | 4,90  | 0,01  |
| -0,18 | -0,04 | 0,86  | 2,30  |
| -0,15 | 0,18  | 0,01  | 8,19  |
| -1,35 | 0,09  | 3,30  | 1,83  |
| 0,35  | 0,12  | NAN   | NAN   |
| 0,16  | -0,08 | NAN   | NAN   |
| 0,08  | 0,19  | NAN   | NAN   |
| 0,00  | 0,07  | NAN   | NAN   |
| 0,01  | 0,07  | NAN   | NAN   |
| -0,55 | 0,17  | NAN   | NAN   |
| -0,24 | 0,15  | NAN   | NAN   |
| 0,12  | 0,11  | NAN   | NAN   |

|       |       |       |        |
|-------|-------|-------|--------|
| -0,09 | 0,17  | NAN   | NAN    |
| -0,09 | 0,09  | NAN   | NAN    |
| 0,04  | -0,18 | NAN   | NAN    |
| 0,02  | -0,08 | NAN   | NAN    |
| -0,13 | 0,33  | NAN   | NAN    |
| 0,09  | 0,10  | 0,01  | 0,01   |
| -0,41 | -0,41 | NAN   | NAN    |
| 0,06  | 0,10  | 0,01  | 0,01   |
| 0,13  | -0,23 | 0,01  | 0,01   |
| 0,30  | 0,32  | NAN   | NAN    |
| -0,57 | 0,09  | 15,64 | 2,97   |
| 0,01  | 0,40  | NAN   | NAN    |
| 0,27  | 0,28  | NAN   | NAN    |
| 0,08  | 0,38  | 0,01  | 11,02  |
| -0,08 | 0,09  | NAN   | NAN    |
| 0,28  | 0,14  | 34,38 | 27,43  |
| -0,27 | 0,03  | 7,83  | 27,07  |
| -0,07 | 0,10  | NAN   | NAN    |
| 0,41  | 0,36  | NAN   | NAN    |
| 0,53  | 0,64  | NAN   | NAN    |
| 0,07  | 0,31  | NAN   | NAN    |
| 0,20  | 0,20  | 2,79  | 0,86   |
| -0,01 | -0,09 | 0,01  | 0,01   |
| 0,34  | 0,40  | 87,19 | 107,32 |
| 0,06  | 0,45  | 0,01  | 12,15  |
| 0,20  | 0,30  | 0,01  | 0,01   |
| 0,16  | -0,03 | 3,30  | 13,11  |
| -0,05 | 0,29  | 0,01  | 6,75   |
| -0,02 | 0,43  | 28,15 | 4,91   |
| -0,04 | -0,22 | 0,97  | 0,01   |
| 0,13  | -0,10 | 0,90  | 0,01   |
| 0,11  | 0,26  | 32,41 | 36,46  |
| -0,24 | -0,29 | 2,79  | 5,47   |
| 0,07  | -0,03 | 0,01  | 0,01   |
| 0,19  | 0,04  | 0,01  | 0,01   |
| -0,56 | 0,02  | 32,85 | 0,80   |
| 0,13  | 0,18  | 0,01  | 0,01   |
| NAN   | NAN   | 0,01  | 0,01   |
| NAN   | NAN   | 4,72  | 0,01   |
| NAN   | NAN   | 1,56  | 8,88   |
| NAN   | NAN   | 0,01  | 0,01   |
| NAN   | NAN   | 0,01  | 0,01   |
| NAN   | NAN   | NAN   | NAN    |
| NAN   | NAN   | 0,01  | 0,01   |
| NAN   | NAN   | 0,80  | 0,01   |
| NAN   | NAN   | 0,01  | 3,42   |
| NAN   | NAN   | 29,43 | 4,20   |
| NAN   | NAN   | 16,88 | 3,55   |
| NAN   | NAN   | 0,01  | 0,91   |
| NAN   | NAN   | NAN   | NAN    |



|     |     |       |       |
|-----|-----|-------|-------|
| NAN | NAN | 1,43  | 0,88  |
| NAN | NAN | 1,60  | 4,76  |
| NAN | NAN | 1,43  | 0,01  |
| NAN | NAN | 0,01  | 0,01  |
| NAN | NAN | NAN   | NAN   |
| NAN | NAN | 0,49  | 0,43  |
| NAN | NAN | 43,36 | 23,63 |
| NAN | NAN | 0,01  | 0,01  |
| NAN | NAN | 0,01  | 3,45  |
| NAN | NAN | 1,00  | 0,91  |
| NAN | NAN | NAN   | NAN   |
| NAN | NAN | 0,01  | 0,01  |
| NAN | NAN | 5,30  | 0,89  |
| NAN | NAN | 1,13  | 0,90  |
| NAN | NAN | 0,01  | 0,01  |
| NAN | NAN | NAN   | NAN   |
| NAN | NAN | NAN   | NAN   |
| NAN | NAN | NAN   | NAN   |
| NAN | NAN | NAN   | NAN   |
| NAN | NAN | NAN   | NAN   |
| NAN | NAN | NAN   | NAN   |
| NAN | NAN | NAN   | NAN   |
| NAN | NAN | 30,26 | 46,92 |
| NAN | NAN | 0,01  | 7,79  |
| NAN | NAN | 22,59 | 9,03  |
| NAN | NAN | 0,01  | 0,01  |
| NAN | NAN | NAN   | NAN   |
| NAN | NAN | NAN   | NAN   |
| NAN | NAN | 7,16  | 3,54  |
| NAN | NAN | 0,01  | 0,01  |
| NAN | NAN | 0,01  | 0,01  |
| NAN | NAN | NAN   | NAN   |
| NAN | NAN | NAN   | NAN   |
| NAN | NAN | 0,01  | 0,01  |
| NAN | NAN | 0,01  | 0,01  |
| NAN | NAN | 0,01  | 0,01  |
| NAN | NAN | 1,99  | 2,36  |
| NAN | NAN | 2,15  | 2,92  |
| NAN | NAN | 0,01  | 0,01  |
| NAN | NAN | NAN   | NAN   |
| NAN | NAN | 7,44  | 0,01  |
| NAN | NAN | 0,82  | 0,01  |
| NAN | NAN | 0,01  | 0,01  |
| NAN | NAN | 0,01  | 0,01  |
| NAN | NAN | 0,01  | 0,01  |
| NAN | NAN | NAN   | NAN   |
| NAN | NAN | NAN   | NAN   |
| NAN | NAN | NAN   | NAN   |
| NAN | NAN | NAN   | NAN   |

|     |     |       |      |
|-----|-----|-------|------|
| NAN | NAN | 0,01  | 2,81 |
| NAN | NAN | 0,89  | 0,01 |
| NAN | NAN | 3,90  | 3,90 |
| NAN | NAN | 0,01  | 0,01 |
| NAN | NAN | 1,31  | 0,01 |
| NAN | NAN | 1,46  | 0,01 |
| NAN | NAN | 0,01  | 0,01 |
| NAN | NAN | 0,01  | 8,74 |
| NAN | NAN | 1,31  | 0,01 |
| NAN | NAN | 3,78  | 4,62 |
| NAN | NAN | 12,32 | 8,62 |
| NAN | NAN | 1,31  | 0,01 |
| NAN | NAN | NAN   | NAN  |
| NAN | NAN | NAN   | NAN  |
| NAN | NAN | NAN   | NAN  |
| NAN | NAN | NAN   | NAN  |

| IL-6 increase 24 gw | IL-6 increase 2 Yrs PD | IL-6 change 24 gw | IL-6 change 2Yrs PD |
|---------------------|------------------------|-------------------|---------------------|
| -0,21               | 0,87                   | -0,07             | 0,29                |
| 1,21                | 2,01                   | 0,24              | 0,40                |
| -6,17               | -1,00                  | -1,19             | -0,19               |
| 5,29                | 4,08                   | 0,74              | 0,57                |
| 1,21                | 1,20                   | 0,26              | 0,25                |
| -2,21               | -5,73                  | -0,65             | -1,70               |
| 0,54                | 0,70                   | 0,34              | 0,45                |
| 0,20                | -0,61                  | 0,09              | -0,28               |
| -0,88               | -0,88                  | -0,62             | -0,62               |
| 0,07                | -0,94                  | 0,03              | -0,34               |
| 0,07                | -0,87                  | 0,04              | -0,44               |
| -1,55               | -0,41                  | -1,20             | -0,32               |
| 1,81                | 1,61                   | 0,45              | 0,40                |
| -0,68               | -0,27                  | -0,42             | -0,17               |
| 0,57                | 1,11                   | 0,21              | 0,41                |
| 13,66               | 17,66                  | 0,54              | 0,69                |
| 3,08                | -0,09                  | 0,30              | -0,01               |
| -3,31               | -9,60                  | -0,50             | -1,45               |
| 0,00                | -0,30                  | 0,00              | -0,09               |
| -0,99               | 0,38                   | -0,39             | 0,15                |
| -7,70               | 4,36                   | -0,81             | 0,46                |
| 10,31               | 7,25                   | 0,56              | 0,39                |
| -1,31               | -3,19                  | -0,47             | -1,14               |
| -6,79               | 0,73                   | -1,08             | 0,12                |
| -1,24               | -2,08                  | -0,33             | -0,56               |
| 4,47                | -4,25                  | 0,47              | -0,45               |
| -1,11               | -2,82                  | -0,74             | -1,87               |
| -0,20               | 1,17                   | -0,06             | 0,35                |
| -0,29               | -0,79                  | -0,13             | -0,35               |
| 1,35                | 7,27                   | 0,15              | 0,80                |
| 9,53                | -2,52                  | 0,51              | -0,14               |
| -1,17               | 3,97                   | -0,18             | 0,61                |
| -1,60               | -3,24                  | -160,00           | -324,00             |
| 1,27                | 12,05                  | 0,08              | 0,80                |
| 0,43                | -0,65                  | 0,19              | -0,28               |
| 0,10                | -0,32                  | 0,04              | -0,14               |
| 2,25                | 1,36                   | 0,28              | 0,17                |
| -3,04               | -2,36                  | -0,56             | -0,44               |
| 0,42                | -1,52                  | 0,11              | -0,41               |
| -8,41               | 1,36                   | -2,05             | 0,33                |
| -0,11               | 0,64                   | -0,06             | 0,32                |
| 6,79                | 2,97                   | 0,49              | 0,21                |
| 0,00                | -8,44                  | 0,00              | -844,00             |
| 9,79                | 10,32                  | 0,84              | 0,88                |
| 0,00                | 0,00                   | 0,00              | 0,00                |
| 0,19                | 0,00                   | 0,12              | 0,00                |
| 14,72               | 23,38                  | 0,27              | 0,43                |

|        |       |         |         |
|--------|-------|---------|---------|
| -0,08  | 0,93  | -0,03   | 0,33    |
| -0,76  | -3,84 | -0,32   | -1,61   |
| -3,48  | 16,32 | -0,20   | 0,92    |
| 0,75   | 1,44  | 0,20    | 0,38    |
| 2,86   | 2,86  | 1,00    | 1,00    |
| -11,24 | -9,45 | -12,92  | -10,86  |
| 0,23   | -0,76 | 0,10    | -0,32   |
| NAN    | NAN   | NAN     | NAN     |
| 1,90   | 0,88  | 0,19    | 0,09    |
| 0,39   | -8,47 | 0,20    | -4,41   |
| 0,00   | -4,52 | 0,00    | -3,50   |
| -0,47  | -1,23 | -0,27   | -0,69   |
| -9,42  | 0,63  | -4,53   | 0,30    |
| -1,47  | 3,34  | -0,25   | 0,57    |
| -0,26  | -2,02 | -0,30   | -2,32   |
| NAN    | NAN   | NAN     | NAN     |
| -1,14  | 5,37  | -0,21   | 1,00    |
| -0,17  | -0,51 | -0,08   | -0,25   |
| 0,99   | -8,13 | 0,17    | -1,36   |
| 4,03   | 4,27  | 0,53    | 0,56    |
| -4,42  | 3,58  | -0,50   | 0,41    |
| 0,00   | -1,69 | 0,00    | -169,00 |
| -1,56  | -1,72 | -1,43   | -1,58   |
| 3,61   | -3,26 | 0,45    | -0,41   |
| -0,91  | -8,51 | -0,36   | -3,32   |
| 0,00   | 0,00  | 0,00    | 0,00    |
| 0,00   | 0,00  | 0,00    | 0,00    |
| 9,20   | 8,07  | 0,76    | 0,66    |
| 0,99   | 1,93  | 0,35    | 0,67    |
| -1,95  | -8,80 | -195,00 | -880,00 |
| 0,00   | 0,00  | 0,00    | 0,00    |
| 0,00   | -1,69 | 0,00    | -169,00 |
| 1,29   | -0,59 | 0,49    | -0,23   |
| 0,41   | 4,28  | 0,03    | 0,32    |
| -7,01  | 0,99  | -3,77   | 0,53    |
| 6,04   | 6,59  | 0,43    | 0,47    |
| -0,39  | -0,98 | -0,18   | -0,44   |
| -2,30  | -1,65 | -230,00 | -165,00 |
| -1,31  | -4,85 | -131,00 | -485,00 |
| 0,00   | -1,59 | 0,00    | -1,67   |
| 2,54   | 3,72  | 0,42    | 0,62    |
| 0,70   | -1,27 | 0,20    | -0,35   |
| -3,19  | -3,19 | -319,00 | -319,00 |
| -2,15  | -0,45 | -1,75   | -0,37   |
| 0,15   | 3,32  | 0,05    | 1,00    |
| NAN    | NAN   | NAN     | NAN     |
| 1,00   | -9,88 | 0,14    | -1,43   |
| -2,04  | -3,43 | -2,43   | -4,08   |
| 1,75   | 0,00  | 0,14    | 0,00    |
| 0,00   | 0,00  | 0,00    | 0,00    |

|        |         |         |          |
|--------|---------|---------|----------|
| 3,19   | 3,19    | 0,41    | 0,41     |
| -0,92  | -0,57   | -0,39   | -0,24    |
| 45,10  | 45,82   | 0,94    | 0,95     |
| -1,61  | -2,32   | -0,48   | -0,70    |
| 0,58   | 1,70    | 0,22    | 0,63     |
| 5,40   | 5,70    | 0,74    | 0,78     |
| -1,85  | -3,42   | -0,16   | -0,29    |
| 0,00   | -0,98   | 0,00    | -98,00   |
| -0,50  | 1,35    | -0,21   | 0,58     |
| NAN    | NAN     | NAN     | NAN      |
| 1,58   | 1,58    | 0,99    | 0,99     |
| -1,01  | -2,83   | -0,98   | -2,75    |
| 10,53  | 6,70    | 0,51    | 0,32     |
| 3,84   | 7,01    | 0,43    | 0,79     |
| 8,21   | 4,02    | 0,53    | 0,26     |
| -0,17  | -1,10   | -0,10   | -0,66    |
| NAN    | NAN     | NAN     | NAN      |
| -0,25  | -12,13  | -0,10   | -4,93    |
| 1,29   | -8,96   | 0,15    | -1,07    |
| -1,57  | -2,34   | -1,87   | -2,79    |
| -53,34 | -144,51 | -0,99   | -2,68    |
| 1,64   | 2,64    | 0,47    | 0,76     |
| -1,66  | -4,01   | -0,48   | -1,15    |
| -0,40  | -0,16   | -0,10   | -0,04    |
| 14,73  | 8,96    | 0,52    | 0,31     |
| 7,51   | 11,20   | 0,31    | 0,46     |
| 1,43   | -0,88   | 0,23    | -0,14    |
| -1,16  | -3,87   | -1,21   | -4,03    |
| 2,54   | 4,16    | 0,19    | 0,30     |
| -4,46  | -6,54   | -1,00   | -1,47    |
| -4,22  | 9,71    | -0,23   | 0,54     |
| 15,71  | 11,31   | 0,68    | 0,49     |
| -2,10  | 5,33    | -0,39   | 1,00     |
| 1,08   | -5,07   | 0,99    | -4,65    |
| 0,81   | 2,66    | 0,22    | 0,73     |
| 0,00   | -7,24   | 0,00    | -724,00  |
| 4,22   | 4,11    | 0,55    | 0,53     |
| -1,94  | -13,32  | -194,00 | -1332,00 |
| 1,53   | 1,58    | 0,42    | 0,44     |
| -1,01  | -1,37   | -0,11   | -0,15    |
| -4,37  | -7,52   | -4,51   | -7,75    |
| -0,44  | -7,73   | -0,10   | -1,76    |
| -1,95  | 15,67   | -0,06   | 0,47     |
| -2,41  | 3,74    | -0,30   | 0,47     |
| -1,07  | -1,86   | -107,00 | -186,00  |
| -3,57  | -2,10   | -0,53   | -0,31    |
| -0,86  | -0,84   | -86,00  | -84,00   |
| -0,46  | -50,38  | -0,01   | -1,49    |
| -2,90  | -3,38   | -0,68   | -0,79    |
| -0,59  | -1,25   | -0,60   | -1,28    |

[illegible]

|        |        |          |          |
|--------|--------|----------|----------|
| NAN    | NAN    | NAN      | NAN      |
| NAN    | NAN    | NAN      | NAN      |
| NAN    | NAN    | NAN      | NAN      |
| NAN    | NAN    | NAN      | NAN      |
| NAN    | NAN    | NAN      | NAN      |
| 0,00   | 0,00   | 0,00     | 0,00     |
| NAN    | NAN    | NAN      | NAN      |
| 0,00   | 0,00   | 0,00     | 0,00     |
| 0,00   | 0,00   | 0,00     | 0,00     |
| NAN    | NAN    | NAN      | NAN      |
| 11,15  | 23,82  | 0,42     | 0,89     |
| NAN    | NAN    | NAN      | NAN      |
| NAN    | NAN    | NAN      | NAN      |
| 0,00   | -11,01 | 0,00     | -1101,00 |
| NAN    | NAN    | NAN      | NAN      |
| 10,63  | 17,58  | 0,24     | 0,39     |
| 21,89  | 2,65   | 0,74     | 0,09     |
| NAN    | NAN    | NAN      | NAN      |
| NAN    | NAN    | NAN      | NAN      |
| NAN    | NAN    | NAN      | NAN      |
| NAN    | NAN    | NAN      | NAN      |
| -0,49  | 1,44   | -0,21    | 0,63     |
| 0,00   | 0,00   | 0,00     | 0,00     |
| 2,58   | -17,55 | 0,03     | -0,20    |
| 0,00   | -12,14 | 0,00     | -1214,00 |
| 0,00   | 0,00   | 0,00     | 0,00     |
| 2,17   | -7,64  | 0,40     | -1,40    |
| 0,86   | -5,88  | 0,99     | -6,76    |
| -25,85 | -2,61  | -11,24   | -1,13    |
| 0,52   | 1,48   | 0,35     | 0,99     |
| 0,48   | 1,37   | 0,35     | 0,99     |
| 6,53   | 2,48   | 0,17     | 0,06     |
| -2,01  | -4,69  | -2,58    | -6,01    |
| 0,00   | 0,00   | 0,00     | 0,00     |
| 0,00   | 0,00   | 0,00     | 0,00     |
| -6,96  | 25,09  | -0,27    | 0,97     |
| 0,00   | 0,00   | 0,00     | 0,00     |
| 0,00   | 0,00   | 0,00     | 0,00     |
| 16,04  | 20,75  | 0,77     | 1,00     |
| 0,89   | -6,43  | 0,36     | -2,62    |
| 0,00   | 0,00   | 0,00     | 0,00     |
| 0,79   | 0,79   | 0,99     | 0,99     |
| NAN    | NAN    | NAN      | NAN      |
| 0,00   | 0,00   | 0,00     | 0,00     |
| 0,04   | 0,83   | 0,05     | 0,99     |
| 0,61   | -2,80  | 0,98     | -4,52    |
| -29,42 | -4,19  | -2942,00 | -419,00  |
| -5,92  | 7,41   | -0,54    | 0,68     |
| 0,00   | -0,90  | 0,00     | -90,00   |
| NAN    | NAN    | NAN      | NAN      |

|       |       |         |         |
|-------|-------|---------|---------|
| -1,42 | -0,87 | -142,00 | -87,00  |
| 6,11  | 2,95  | 0,79    | 0,38    |
| 3,44  | 4,86  | 0,71    | 1,00    |
| 0,00  | 0,00  | 0,00    | 0,00    |
| NAN   | NAN   | NAN     | NAN     |
| 5,54  | 5,60  | 0,92    | 0,93    |
| 8,26  | 27,99 | 0,16    | 0,54    |
| 0,00  | 0,00  | 0,00    | 0,00    |
| 0,00  | -3,44 | 0,00    | -344,00 |
| -0,99 | -0,90 | -99,00  | -90,00  |
| NAN   | NAN   | NAN     | NAN     |
| 0,00  | 0,00  | 0,00    | 0,00    |
| -0,62 | 3,79  | -0,13   | 0,81    |
| 3,45  | 3,68  | 0,75    | 0,80    |
| 0,00  | 0,00  | 0,00    | 0,00    |
| NAN   | NAN   | NAN     | NAN     |
| NAN   | NAN   | NAN     | NAN     |
| NAN   | NAN   | NAN     | NAN     |
| NAN   | NAN   | NAN     | NAN     |
| NAN   | NAN   | NAN     | NAN     |
| NAN   | NAN   | NAN     | NAN     |
| NAN   | NAN   | NAN     | NAN     |
| NAN   | NAN   | NAN     | NAN     |
| 10,54 | -6,12 | 0,26    | -0,15   |
| 0,00  | -7,78 | 0,00    | -778,00 |
| 10,15 | 23,71 | 0,31    | 0,72    |
| 0,00  | 0,00  | 0,00    | 0,00    |
| NAN   | NAN   | NAN     | NAN     |
| NAN   | NAN   | NAN     | NAN     |
| -1,46 | 2,16  | -0,26   | 0,38    |
| 0,00  | 0,00  | 0,00    | 0,00    |
| 0,00  | 0,00  | 0,00    | 0,00    |
| NAN   | NAN   | NAN     | NAN     |
| NAN   | NAN   | NAN     | NAN     |
| 0,00  | 0,00  | 0,00    | 0,00    |
| 0,00  | 0,00  | 0,00    | 0,00    |
| 0,81  | 0,81  | 0,99    | 0,99    |
| 0,59  | 0,22  | 0,23    | 0,09    |
| -0,05 | -0,82 | -0,02   | -0,39   |
| 0,00  | 0,00  | 0,00    | 0,00    |
| NAN   | NAN   | NAN     | NAN     |
| -3,70 | 3,73  | -0,99   | 1,00    |
| -0,81 | 0,00  | -81,00  | 0,00    |
| 0,00  | 0,00  | 0,00    | 0,00    |
| 0,00  | 0,00  | 0,00    | 0,00    |
| 0,81  | 0,81  | 0,99    | 0,99    |
| NAN   | NAN   | NAN     | NAN     |
| NAN   | NAN   | NAN     | NAN     |
| NAN   | NAN   | NAN     | NAN     |
| NAN   | NAN   | NAN     | NAN     |



|       |       |         |         |
|-------|-------|---------|---------|
| 3,89  | 1,09  | 1,00    | 0,28    |
| -0,88 | 0,00  | -88,00  | 0,00    |
| 4,72  | 4,72  | 0,55    | 0,55    |
| 0,00  | 0,00  | 0,00    | 0,00    |
| -1,30 | 0,00  | -130,00 | 0,00    |
| -0,11 | 1,34  | -0,08   | 0,99    |
| 0,00  | 0,00  | 0,00    | 0,00    |
| 0,00  | -8,73 | 0,00    | -873,00 |
| -1,30 | 0,00  | -130,00 | 0,00    |
| 1,07  | 0,23  | 0,22    | 0,05    |
| -9,15 | -5,45 | -2,89   | -1,72   |
| -1,30 | 0,00  | -130,00 | 0,00    |
| NAN   | NAN   | NAN     | NAN     |
| NAN   | NAN   | NAN     | NAN     |
| NAN   | NAN   | NAN     | NAN     |
| NAN   | NAN   | NAN     | NAN     |

| Leptin (ng/ml) 24 gw | Leptin (ng/ml) 2 yrs. PD | Leptin increase 24 gw |
|----------------------|--------------------------|-----------------------|
| 8,43                 | 2,28                     | -5,58                 |
| 25,84                | 14,57                    | 3,34                  |
| 15,17                | 7,90                     | -0,83                 |
| 18,40                | 16,99                    | 1,76                  |
| 11,21                | 13,60                    | -3,49                 |
| 6,13                 | 5,75                     | -4,48                 |
| 3,27                 | 2,17                     | -1,68                 |
| 38,16                | 25,33                    | -9,35                 |
| 16,72                | 11,44                    | -5,15                 |
| 27,42                | 28,02                    | -7,77                 |
| 15,32                | 3,58                     | -10,10                |
| 24,04                | 16,27                    | -1,88                 |
| 5,76                 | 3,11                     | -3,41                 |
| 18,70                | 16,49                    | -3,84                 |
| 3,58                 | 2,26                     | 0,02                  |
| 5,17                 | 4,87                     | -0,34                 |
| 11,79                | 2,54                     | -7,26                 |
| 7,02                 | 4,19                     | -1,83                 |
| 6,04                 | 14,41                    | -2,28                 |
| 8,78                 | 9,76                     | 4,88                  |
| 4,29                 | 5,25                     | -1,37                 |
| 18,84                | 16,07                    | -10,76                |
| 30,78                | 29,84                    | -6,59                 |
| 20,06                | 3,05                     | -12,77                |
| 29,46                | 16,25                    | -2,92                 |
| 11,03                | 8,93                     | -7,64                 |
| 20,43                | 16,24                    | -12,36                |
| 26,24                | 20,61                    | -10,09                |
| 8,05                 | 1,30                     | -4,25                 |
| 10,63                | 5,12                     | -4,46                 |
| 14,98                | 19,07                    | -0,42                 |
| 14,89                | 10,13                    | -8,55                 |
| 15,47                | 7,36                     | -11,78                |
| 9,76                 | 10,93                    | -1,38                 |
| 29,06                | 17,06                    | -9,43                 |
| 21,26                | 5,31                     | -16,48                |
| 3,17                 | 1,98                     | -1,30                 |
| 27,94                | 21,61                    | -2,53                 |
| 24,91                | 27,28                    | -5,79                 |
| 17,75                | 22,59                    | -4,66                 |
| 26,96                | 8,66                     | -8,50                 |
| 15,33                | 10,73                    | -1,50                 |
| 34,06                | 25,25                    | -13,21                |
| 8,07                 | 10,39                    | -3,27                 |
| 8,39                 | 4,68                     | -2,21                 |
| 34,64                | 16,46                    | -16,69                |
| 10,17                | 4,59                     | -8,17                 |

|       |       |        |
|-------|-------|--------|
| 5,99  | 4,62  | -0,97  |
| 17,46 | 5,66  | -8,08  |
| 25,81 | 11,09 | -11,76 |
| 36,88 | 24,64 | -9,24  |
| 4,11  | 3,12  | 27,09  |
| 33,99 | 27,78 | -31,15 |
| 15,28 | 5,37  | -9,23  |
| NAN   | NAN   | NAN    |
| 10,91 | 4,95  | -5,12  |
| 5,06  | 7,03  | 0,80   |
| 15,29 | 2,09  | -7,71  |
| 5,06  | 10,69 | -0,82  |
| 22,47 | 14,55 | -4,56  |
| 6,45  | 1,00  | -0,99  |
| 11,09 | 6,02  | -3,40  |
| NAN   | NAN   | NAN    |
| 14,38 | 2,99  | -3,10  |
| 7,23  | 3,03  | -1,08  |
| 19,32 | 16,14 | -5,23  |
| 13,95 | 10,64 | -6,05  |
| 11,81 | 22,58 | -0,54  |
| 7,68  | 5,89  | -0,86  |
| 19,48 | 16,39 | -6,02  |
| 5,01  | 3,64  | -2,66  |
| 49,38 | 42,69 | -20,24 |
| 13,89 | 16,23 | 5,75   |
| 17,66 | 1,87  | -5,62  |
| 41,19 | 51,92 | -20,52 |
| 3,92  | 2,62  | -1,05  |
| 33,03 | 15,95 | -19,62 |
| 5,27  | 1,74  | -2,89  |
| 13,43 | 13,96 | -7,50  |
| 20,72 | 12,01 | -9,71  |
| 21,38 | 10,31 | -11,48 |
| 16,84 | 13,51 | -7,97  |
| 7,65  | 6,32  | -3,96  |
| 7,15  | 8,24  | -2,23  |
| 12,26 | 9,85  | -5,45  |
| 12,51 | 7,54  | -6,39  |
| 6,65  | 2,90  | -3,92  |
| 7,28  | 3,68  | -2,52  |
| 10,55 | 9,89  | -3,64  |
| 15,61 | 12,71 | -1,96  |
| 4,85  | 2,17  | -2,88  |
| 7,57  | 3,57  | -5,10  |
| NAN   | NAN   | NAN    |
| 7,41  | 2,38  | 1,07   |
| 8,92  | 2,80  | -3,10  |
| 10,82 | 5,80  | -1,33  |
| 13,42 | 3,27  | -3,04  |

|       |       |        |
|-------|-------|--------|
| 1,68  | 2,18  | 2,29   |
| 3,70  | 1,25  | -0,80  |
| 32,95 | 10,30 | -31,37 |
| 7,69  | 2,88  | -2,91  |
| 24,23 | 7,74  | -15,48 |
| 23,03 | 7,93  | -12,25 |
| 9,65  | 4,88  | -3,18  |
| 11,60 | 6,82  | -5,47  |
| 10,35 | 5,54  | -3,05  |
| NAN   | NAN   | NAN    |
| 11,86 | 5,95  | -5,51  |
| 6,22  | 6,21  | -3,82  |
| 2,43  | 0,89  | -1,12  |
| 5,74  | 1,31  | -2,50  |
| 17,16 | 12,49 | -4,57  |
| 7,56  | 2,63  | -3,91  |
| NAN   | NAN   | NAN    |
| 16,68 | 1,13  | -11,24 |
| 17,01 | 3,56  | -6,22  |
| 0,79  | 0,46  | -0,34  |
| 15,10 | 9,13  | -7,55  |
| 13,89 | 6,50  | -1,96  |
| 8,23  | 2,69  | -1,81  |
| 25,88 | 5,07  | -10,68 |
| 16,16 | 8,61  | -6,89  |
| 8,77  | 3,53  | -2,86  |
| 3,68  | 0,55  | -2,23  |
| 17,07 | 7,24  | -1,56  |
| 30,66 | 23,74 | -17,06 |
| 3,99  | 2,58  | -1,27  |
| 24,27 | 23,71 | 0,99   |
| 27,21 | 19,84 | -20,00 |
| 8,76  | 6,00  | -2,39  |
| 9,74  | 7,81  | -4,78  |
| 23,40 | 18,94 | -10,26 |
| 9,47  | 4,77  | -5,20  |
| 29,81 | 23,96 | -8,94  |
| 19,88 | 26,83 | -11,14 |
| 13,71 | 8,12  | -1,57  |
| 17,27 | 9,64  | -5,91  |
| 13,05 | 9,61  | -3,14  |
| 14,56 | 17,93 | -1,89  |
| 10,64 | 19,32 | -0,46  |
| 11,52 | 6,39  | -5,17  |
| 13,45 | 4,72  | -8,88  |
| 15,28 | 10,46 | -8,22  |
| 10,02 | 7,85  | -4,55  |
| 7,50  | 3,36  | -5,83  |
| 14,73 | 8,53  | -8,41  |
| 9,99  | 9,16  | -2,01  |

[illegible]

|       |       |        |
|-------|-------|--------|
| NAN   | NAN   | NAN    |
| 14,68 | 8,27  | -6,18  |
| NAN   | NAN   | NAN    |
| 6,25  | 15,36 | 3,76   |
| 14,84 | 7,73  | -0,02  |
| NAN   | NAN   | NAN    |
| 3,73  | 3,16  | -0,18  |
| NAN   | NAN   | NAN    |
| NAN   | NAN   | NAN    |
| 19,97 | 13,41 | -2,15  |
| NAN   | NAN   | NAN    |
| 25,47 | 17,13 | -14,63 |
| 6,49  | 14,56 | 2,36   |
| NAN   | NAN   | NAN    |
| 7,59  | 3,31  | -2,49  |
| 11,40 | 9,20  | -4,10  |
| 3,42  | 1,35  | -2,38  |
| 13,41 | 18,22 | 0,63   |
| 10,92 | 15,55 | 0,49   |
| 13,57 | 9,51  | -6,53  |
| 14,65 | 20,85 | 8,24   |
| 12,59 | 9,96  | -2,64  |
| 14,80 | 7,21  | -9,32  |
| 7,85  | 6,94  | -4,78  |
| 9,71  | 4,16  | -4,09  |
| 9,17  | 5,59  | -4,02  |
| 1,78  | 1,94  | -0,47  |
| 6,99  | 8,86  | 0,90   |
| 16,78 | 11,93 | -9,32  |
| 4,48  | 2,42  | -2,06  |
| 6,53  | 6,08  | -2,63  |
| 2,54  | 8,29  | -1,02  |
| 8,74  | 9,18  | 2,06   |
| 7,82  | 3,73  | 0,52   |
| 9,53  | 4,67  | -4,24  |
| NAN   | NAN   | NAN    |
| 19,08 | 3,15  | -8,67  |
| 8,03  | 5,77  | -1,55  |
| 7,05  | 4,59  | -6,03  |
| 26,99 | 17,64 | -17,95 |
| 10,72 | 12,59 | -3,24  |
| 7,89  | 1,88  | -5,85  |
| NAN   | NAN   | NAN    |

|       |       |        |
|-------|-------|--------|
| 7,92  | 7,89  | -5,74  |
| 14,20 | 12,00 | -10,23 |
| 18,35 | 13,17 | -8,93  |
| 6,75  | 5,93  | -5,29  |
| NAN   | NAN   | NAN    |
| 8,03  | 1,62  | -4,84  |
| 3,88  | 13,46 | -1,09  |
| 2,27  | 2,10  | -1,61  |
| 5,18  | 2,21  | -2,33  |
| 23,82 | 30,28 | -14,79 |
| NAN   | NAN   | NAN    |
| 12,50 | 12,60 | -8,76  |
| 9,16  | 2,97  | -7,95  |
| 6,99  | 6,82  | -5,12  |
| 7,76  | 3,47  | -5,03  |
| NAN   | NAN   | NAN    |
| 21,71 | 17,76 | -9,04  |
| 9,15  | 10,09 | -3,91  |
| 8,18  | 8,71  | 3,38   |
| 25,16 | 20,11 | -0,88  |
| NAN   | NAN   | NAN    |
| NAN   | NAN   | NAN    |
| 26,75 | 21,28 | -15,40 |
| 8,58  | 1,56  | -5,20  |
| 23,95 | 18,06 | -5,93  |
| NAN   | NAN   | NAN    |
| NAN   | NAN   | NAN    |
| 9,35  | 4,84  | 0,78   |
| 5,41  | 3,81  | 4,26   |
| 2,45  | 13,87 | 5,22   |
| 1,39  | 3,84  | 0,44   |
| 7,88  | 15,63 | 8,87   |
| 8,27  | 15,83 | 7,87   |
| NAN   | NAN   | NAN    |
| 5,19  | 4,95  | 7,42   |
| 13,83 | 7,62  | 0,09   |
| 6,10  | 6,12  | 1,85   |
| 8,01  | 3,28  | 4,09   |
| 2,77  | 1,59  | 0,21   |
| NAN   | NAN   | NAN    |

|       |       |       |
|-------|-------|-------|
| 4,80  | 7,36  | 6,32  |
| 7,72  | 15,23 | 2,01  |
| 6,17  | 5,62  | 6,80  |
| 2,16  | 4,05  | -0,07 |
| 9,94  | 8,33  | -3,78 |
| 12,73 | 14,05 | 3,58  |
| 24,82 | 17,13 | -0,70 |
| 5,45  | 9,73  | 1,01  |
| 4,61  | 7,09  | 0,40  |
| 15,43 | 9,21  | -1,14 |
| 10,83 | 11,61 | 2,41  |
| 13,22 | 15,25 | -0,65 |
| NAN   | NAN   | NAN   |



| Leptin increase 2 yrs PD | Leptin change 24 gw | Leptin change 2 yrs PD |
|--------------------------|---------------------|------------------------|
| 0,57                     | -1,96               | 0,20                   |
| 14,61                    | 0,11                | 0,50                   |
| 6,44                     | -0,06               | 0,45                   |
| 3,17                     | 0,09                | 0,16                   |
| -5,88                    | -0,45               | -0,76                  |
| -4,10                    | -2,72               | -2,48                  |
| -0,58                    | -1,06               | -0,36                  |
| 3,48                     | -0,32               | 0,12                   |
| 0,13                     | -0,45               | 0,01                   |
| -8,37                    | -0,40               | -0,43                  |
| 1,64                     | -1,93               | 0,31                   |
| 5,89                     | -0,08               | 0,27                   |
| -0,76                    | -1,45               | -0,32                  |
| -1,63                    | -0,26               | -0,11                  |
| 1,34                     | 0,01                | 0,37                   |
| -0,04                    | -0,07               | -0,01                  |
| 1,99                     | -1,60               | 0,44                   |
| 1,00                     | -0,35               | 0,19                   |
| -10,65                   | -0,61               | -2,83                  |
| 3,90                     | 0,36                | 0,29                   |
| -2,33                    | -0,47               | -0,80                  |
| -7,99                    | -1,33               | -0,99                  |
| -5,65                    | -0,27               | -0,23                  |
| 4,24                     | -1,75               | 0,58                   |
| 10,29                    | -0,11               | 0,39                   |
| -5,54                    | -2,25               | -1,63                  |
| -8,17                    | -1,53               | -1,01                  |
| -4,46                    | -0,62               | -0,28                  |
| 2,50                     | -1,12               | 0,66                   |
| 1,05                     | -0,72               | 0,17                   |
| -4,51                    | -0,03               | -0,31                  |
| -3,79                    | -1,35               | -0,60                  |
| -3,67                    | -3,19               | -0,99                  |
| -2,55                    | -0,16               | -0,30                  |
| 2,57                     | -0,48               | 0,13                   |
| -0,53                    | -3,45               | -0,11                  |
| -0,11                    | -0,70               | -0,06                  |
| 3,80                     | -0,10               | 0,15                   |
| -8,16                    | -0,30               | -0,43                  |
| -9,50                    | -0,36               | -0,73                  |
| 9,80                     | -0,46               | 0,53                   |
| 3,10                     | -0,11               | 0,22                   |
| -4,40                    | -0,63               | -0,21                  |
| -5,59                    | -0,68               | -1,16                  |
| 1,50                     | -0,36               | 0,24                   |
| 1,49                     | -0,93               | 0,08                   |
| -2,59                    | -4,09               | -1,30                  |

|        |        |       |
|--------|--------|-------|
| 0,40   | -0,19  | 0,08  |
| 3,72   | -0,86  | 0,40  |
| 2,96   | -0,84  | 0,21  |
| 3,00   | -0,33  | 0,11  |
| 28,08  | 0,87   | 0,90  |
| -24,94 | -10,97 | -8,78 |
| 0,68   | -1,53  | 0,11  |
| NAN    | NAN    | NAN   |
| 0,84   | -0,88  | 0,15  |
| -1,17  | 0,14   | -0,20 |
| 5,49   | -1,02  | 0,72  |
| -6,45  | -0,19  | -1,52 |
| 3,36   | -0,25  | 0,19  |
| 4,46   | -0,18  | 0,82  |
| 1,67   | -0,44  | 0,22  |
| NAN    | NAN    | NAN   |
| 8,29   | -0,27  | 0,73  |
| 3,12   | -0,18  | 0,51  |
| -2,05  | -0,37  | -0,15 |
| -2,74  | -0,77  | -0,35 |
| -11,31 | -0,05  | -1,00 |
| 0,93   | -0,13  | 0,14  |
| -2,93  | -0,45  | -0,22 |
| -1,29  | -1,13  | -0,55 |
| -13,55 | -0,69  | -0,46 |
| 3,41   | 0,29   | 0,17  |
| 10,17  | -0,47  | 0,84  |
| -31,25 | -0,99  | -1,51 |
| 0,25   | -0,37  | 0,09  |
| -2,54  | -1,46  | -0,19 |
| 0,64   | -1,21  | 0,27  |
| -8,03  | -1,26  | -1,35 |
| -1,00  | -0,88  | -0,09 |
| -0,41  | -1,16  | -0,04 |
| -4,64  | -0,90  | -0,52 |
| -2,63  | -1,07  | -0,71 |
| -3,32  | -0,45  | -0,67 |
| -3,04  | -0,80  | -0,45 |
| -1,42  | -1,04  | -0,23 |
| -0,17  | -1,44  | -0,06 |
| 1,08   | -0,53  | 0,23  |
| -2,98  | -0,53  | -0,43 |
| 0,94   | -0,14  | 0,07  |
| -0,20  | -1,46  | -0,10 |
| -1,10  | -2,06  | -0,45 |
| NAN    | NAN    | NAN   |
| 6,10   | 0,13   | 0,72  |
| 3,02   | -0,53  | 0,52  |
| 3,69   | -0,14  | 0,39  |
| 7,11   | -0,29  | 0,68  |

|        |        |       |
|--------|--------|-------|
| 1,79   | 0,58   | 0,45  |
| 1,65   | -0,28  | 0,57  |
| -8,72  | -19,85 | -5,52 |
| 1,90   | -0,61  | 0,40  |
| 1,01   | -1,77  | 0,12  |
| 2,85   | -1,14  | 0,26  |
| 1,59   | -0,49  | 0,25  |
| -0,69  | -0,89  | -0,11 |
| 1,76   | -0,42  | 0,24  |
| NAN    | NAN    | NAN   |
| 0,40   | -0,87  | 0,06  |
| -3,81  | -1,59  | -1,59 |
| 0,42   | -0,85  | 0,32  |
| 1,93   | -0,77  | 0,60  |
| 0,10   | -0,36  | 0,01  |
| 1,02   | -1,07  | 0,28  |
| NAN    | NAN    | NAN   |
| 4,31   | -2,07  | 0,79  |
| 7,23   | -0,58  | 0,67  |
| -0,01  | -0,76  | -0,02 |
| -1,58  | -1,00  | -0,21 |
| 5,43   | -0,16  | 0,46  |
| 3,73   | -0,28  | 0,58  |
| 10,13  | -0,70  | 0,67  |
| 0,66   | -0,74  | 0,07  |
| 2,38   | -0,48  | 0,40  |
| 0,90   | -1,54  | 0,62  |
| 8,27   | -0,10  | 0,53  |
| -10,14 | -1,25  | -0,75 |
| 0,14   | -0,47  | 0,05  |
| 1,55   | 0,04   | 0,06  |
| -12,63 | -2,77  | -1,75 |
| 0,37   | -0,38  | 0,06  |
| -2,85  | -0,96  | -0,57 |
| -5,80  | -0,78  | -0,44 |
| -0,50  | -1,22  | -0,12 |
| -3,09  | -0,43  | -0,15 |
| -18,09 | -1,27  | -2,07 |
| 4,02   | -0,13  | 0,33  |
| 1,72   | -0,52  | 0,15  |
| 0,30   | -0,32  | 0,03  |
| -5,26  | -0,15  | -0,42 |
| -9,14  | -0,05  | -0,90 |
| -0,04  | -0,81  | -0,01 |
| -0,15  | -1,94  | -0,03 |
| -3,40  | -1,16  | -0,48 |
| -2,38  | -0,83  | -0,44 |
| -1,69  | -3,49  | -1,01 |
| -2,21  | -1,33  | -0,35 |
| -1,18  | -0,25  | -0,15 |

[illegible]

|       |       |       |
|-------|-------|-------|
| NAN   | NAN   | NAN   |
| 0,23  | -0,73 | 0,03  |
| NAN   | NAN   | NAN   |
| -5,35 | 0,38  | -0,53 |
| 7,09  | 0,00  | 0,48  |
| NAN   | NAN   | NAN   |
| 0,39  | -0,05 | 0,11  |
| NAN   | NAN   | NAN   |
| NAN   | NAN   | NAN   |
| 4,41  | -0,12 | 0,25  |
| NAN   | NAN   | NAN   |
| -6,29 | -1,35 | -0,58 |
| -5,71 | 0,27  | -0,65 |
| NAN   | NAN   | NAN   |
| 1,79  | -0,49 | 0,35  |
| -1,90 | -0,56 | -0,26 |
| -0,31 | -2,29 | -0,30 |
| -4,18 | 0,04  | -0,30 |
| -4,14 | 0,04  | -0,36 |
| -2,47 | -0,93 | -0,35 |
| 2,04  | 0,36  | 0,09  |
| -0,01 | -0,27 | 0,00  |
| -1,73 | -1,70 | -0,32 |
| -3,87 | -1,56 | -1,26 |
| 1,46  | -0,73 | 0,26  |
| -0,44 | -0,78 | -0,09 |
| -0,63 | -0,36 | -0,48 |
| -0,97 | 0,11  | -0,12 |
| -4,47 | -1,25 | -0,60 |
| 0,00  | -0,85 | 0,00  |
| -2,18 | -0,67 | -0,56 |
| -6,77 | -0,67 | -4,45 |
| 1,62  | 0,19  | 0,15  |
| 4,61  | 0,06  | 0,55  |
| 0,62  | -0,80 | 0,12  |
| NAN   | NAN   | NAN   |
| 7,26  | -0,83 | 0,70  |
| 0,71  | -0,24 | 0,11  |
| -3,57 | -5,91 | -3,50 |
| -8,60 | -1,99 | -0,95 |
| -5,11 | -0,43 | -0,68 |
| 0,16  | -2,87 | 0,08  |
| NAN   | NAN   | NAN   |

|        |       |       |
|--------|-------|-------|
| -5,71  | -2,63 | -2,62 |
| -8,03  | -2,58 | -2,02 |
| -3,75  | -0,95 | -0,40 |
| -4,47  | -3,62 | -3,06 |
| NAN    | NAN   | NAN   |
| 1,57   | -1,52 | 0,49  |
| -10,67 | -0,39 | -3,82 |
| -1,44  | -2,44 | -2,18 |
| 0,64   | -0,82 | 0,22  |
| -21,25 | -1,64 | -2,35 |
| NAN    | NAN   | NAN   |
| -8,86  | -2,34 | -2,37 |
| -1,76  | -6,57 | -1,45 |
| -4,95  | -2,74 | -2,65 |
| -0,74  | -1,84 | -0,27 |
| NAN    | NAN   | NAN   |
| -5,09  | -0,71 | -0,40 |
| -4,85  | -0,75 | -0,93 |
| 2,85   | 0,29  | 0,25  |
| 4,17   | -0,04 | 0,17  |
| NAN    | NAN   | NAN   |
| NAN    | NAN   | NAN   |
| -9,93  | -1,36 | -0,87 |
| 1,82   | -1,54 | 0,54  |
| -0,04  | -0,33 | 0,00  |
| NAN    | NAN   | NAN   |
| NAN    | NAN   | NAN   |
| 5,29   | 0,08  | 0,52  |
| 5,86   | 0,44  | 0,61  |
| -6,20  | 0,68  | -0,81 |
| -2,01  | 0,24  | -1,10 |
| 1,12   | 0,53  | 0,07  |
| 0,31   | 0,49  | 0,02  |
| NAN    | NAN   | NAN   |
| 7,66   | 0,59  | 0,61  |
| 6,30   | 0,01  | 0,45  |
| 1,83   | 0,23  | 0,23  |
| 8,82   | 0,34  | 0,73  |
| 1,39   | 0,07  | 0,47  |
| NAN    | NAN   | NAN   |

|       |       |       |
|-------|-------|-------|
| 3,76  | 0,57  | 0,34  |
| -5,50 | 0,21  | -0,57 |
| 7,35  | 0,52  | 0,57  |
| -1,96 | -0,03 | -0,94 |
| -2,17 | -0,61 | -0,35 |
| 2,26  | 0,22  | 0,14  |
| 6,99  | -0,03 | 0,29  |
| -3,27 | 0,16  | -0,51 |
| -2,08 | 0,08  | -0,42 |
| 5,08  | -0,08 | 0,36  |
| 1,63  | 0,18  | 0,12  |
| -2,68 | -0,05 | -0,21 |
| NAN   | NAN   | NAN   |

| TNF alpha<br>(pg/mL) 24 gw | TNF alpha<br>(pg/mL) 2 yrs<br>PD | TNF alpha increase 24 gw | TNF alpha change 24 gw |
|----------------------------|----------------------------------|--------------------------|------------------------|
| 2,01                       | 2,61                             | 0,15                     | 0,07                   |
| 1,37                       | 1,82                             | 2,28                     | 0,62                   |
| 4,91                       | 3,64                             | -1,49                    | -0,44                  |
| 5,99                       | 4,53                             | -3,03                    | -1,02                  |
| 3,81                       | 2,89                             | -0,37                    | -0,11                  |
| 2,19                       | 5,00                             | -0,73                    | -0,50                  |
| 2,87                       | 3,13                             | -0,26                    | -0,10                  |
| 0,01                       | 1,47                             | 1,36                     | 0,99                   |
| 2,96                       | 4,11                             | 1,87                     | 0,39                   |
| 3,31                       | 4,80                             | -0,77                    | -0,30                  |
| 1,27                       | 2,56                             | -0,20                    | -0,19                  |
| 1,54                       | 1,88                             | 0,36                     | 0,19                   |
| 1,15                       | 1,43                             | -0,41                    | -0,55                  |
| 2,99                       | 3,55                             | -0,27                    | -0,10                  |
| 4,59                       | 4,59                             | -0,43                    | -0,10                  |
| 2,53                       | 3,38                             | -0,03                    | -0,01                  |
| 2,29                       | 3,52                             | 0,63                     | 0,22                   |
| 5,06                       | 5,78                             | -0,74                    | -0,17                  |
| 7,82                       | 7,24                             | 10,14                    | 0,56                   |
| 9,85                       | 7,62                             | 2,07                     | 0,17                   |
| 3,94                       | 2,04                             | 0,80                     | 0,17                   |
| 5,00                       | 5,37                             | 4,06                     | 0,45                   |
| 5,18                       | 6,71                             | -0,32                    | -0,07                  |
| 5,12                       | 7,14                             | 0,08                     | 0,02                   |
| 5,40                       | 5,62                             | -0,06                    | -0,01                  |
| 5,99                       | 6,25                             | -0,53                    | -0,10                  |
| 3,71                       | 3,84                             | 2,28                     | 0,38                   |
| 6,18                       | 5,89                             | 0,05                     | 0,01                   |
| 1,44                       | 1,60                             | -0,15                    | -0,12                  |
| 11,61                      | 4,60                             | 3,75                     | 0,24                   |
| 4,85                       | 11,56                            | 4,53                     | 0,48                   |
| 6,45                       | 4,87                             | 5,35                     | 0,45                   |
| 3,02                       | 3,77                             | 1,01                     | 0,25                   |
| 2,75                       | 2,56                             | 0,61                     | 0,18                   |
| 5,08                       | 2,78                             | -0,76                    | -0,18                  |
| 0,01                       | 0,01                             | 0,00                     | 0,00                   |
| 1,74                       | 2,38                             | 0,91                     | 0,34                   |
| 1,86                       | 2,55                             | -0,27                    | -0,17                  |
| 6,83                       | 6,28                             | -1,93                    | -0,39                  |
| 4,00                       | 4,30                             | -0,42                    | -0,12                  |
| 4,00                       | 4,40                             | 0,87                     | 0,18                   |
| 2,17                       | 2,80                             | 0,30                     | 0,12                   |
| 5,16                       | 6,05                             | 0,10                     | 0,02                   |
| 3,00                       | 2,21                             | 1,35                     | 0,31                   |
| 2,84                       | 2,79                             | -0,43                    | -0,18                  |
| 4,03                       | 4,40                             | -0,40                    | -0,11                  |
| 4,24                       | 2,98                             | 0,34                     | 0,07                   |



|      |      |       |       |
|------|------|-------|-------|
| 1,68 | 3,94 | 0,73  | 0,30  |
| 3,25 | 3,67 | -0,20 | -0,07 |
| 4,33 | 3,76 | -0,57 | -0,15 |
| 4,73 | 4,39 | -0,25 | -0,06 |
| 1,49 | 1,98 | 1,45  | 0,49  |
| 1,98 | 2,82 | 1,25  | 0,39  |
| 3,78 | 5,26 | -0,08 | -0,02 |
| NAN  | NAN  | NAN   | NAN   |
| 1,67 | 1,97 | 0,11  | 0,06  |
| 1,78 | 3,81 | 0,70  | 0,28  |
| 1,98 | 2,68 | 0,21  | 0,10  |
| 2,17 | 3,50 | -0,05 | -0,02 |
| 4,13 | 3,70 | -1,42 | -0,52 |
| 2,74 | 2,77 | 0,16  | 0,06  |
| 3,41 | 4,20 | 0,02  | 0,01  |
| NAN  | NAN  | NAN   | NAN   |
| 2,54 | 1,77 | -0,22 | -0,09 |
| 4,76 | 6,20 | -0,41 | -0,09 |
| 5,17 | 7,20 | -0,03 | -0,01 |
| 3,75 | 2,22 | 0,79  | 0,17  |
| 2,17 | 4,20 | 0,24  | 0,10  |
| 5,06 | 5,05 | -0,56 | -0,12 |
| 2,59 | 3,56 | 0,29  | 0,10  |
| 4,88 | 7,66 | -0,38 | -0,08 |
| 3,81 | 3,92 | 0,16  | 0,04  |
| 2,88 | 4,12 | -0,27 | -0,10 |
| 0,96 | 1,40 | 0,07  | 0,07  |
| 2,45 | 4,56 | 1,63  | 0,40  |
| 1,99 | 1,65 | 0,25  | 0,11  |
| 4,65 | 6,46 | -2,17 | -0,88 |
| 3,50 | 3,40 | -0,65 | -0,23 |
| 4,28 | 4,17 | -1,06 | -0,33 |
| 3,10 | 3,62 | -0,43 | -0,16 |
| 2,49 | 2,41 | -0,48 | -0,24 |
| 6,35 | 5,36 | -1,72 | -0,37 |
| 2,47 | 2,43 | 0,48  | 0,16  |
| 2,01 | 2,26 | -0,23 | -0,13 |
| 3,93 | 3,25 | -1,06 | -0,37 |
| 3,75 | 3,43 | -0,48 | -0,15 |
| 1,88 | 2,75 | -0,17 | -0,10 |
| 0,70 | 0,01 | 0,01  | 0,01  |
| 2,66 | 2,85 | -0,24 | -0,10 |
| 5,00 | 5,08 | -0,39 | -0,08 |
| 2,23 | 2,88 | -0,11 | -0,05 |
| 1,41 | 0,81 | -0,48 | -0,52 |
| NAN  | NAN  | NAN   | NAN   |
| 0,70 | 3,46 | 0,03  | 0,04  |
| 1,81 | 1,67 | -0,14 | -0,08 |
| 2,94 | 2,12 | -0,05 | -0,02 |
| 2,37 | 2,12 | -0,17 | -0,08 |

|        |       |         |         |
|--------|-------|---------|---------|
| 1,54   | 2,85  | 1,39    | 0,47    |
| 1,02   | 2,05  | 0,12    | 0,11    |
| 1,85   | 1,63  | 0,36    | 0,16    |
| 3,37   | 2,08  | -1,54   | -0,84   |
| 1,97   | 2,49  | 0,11    | 0,05    |
| 0,01   | 0,82  | 0,76    | 0,99    |
| 1,67   | 1,76  | 0,42    | 0,20    |
| 1,94   | 2,25  | 0,27    | 0,12    |
| 3,58   | 4,28  | -0,29   | -0,09   |
| NAN    | NAN   | NAN     | NAN     |
| 1,21   | 2,03  | 0,53    | 0,30    |
| 1,67   | 2,68  | -0,22   | -0,15   |
| 0,01   | 0,01  | 0,76    | 0,99    |
| 283,00 | 1,92  | -280,43 | -109,12 |
| 1,77   | 2,57  | 0,57    | 0,24    |
| 1,76   | 1,60  | 0,75    | 0,30    |
| NAN    | NAN   | NAN     | NAN     |
| 6,28   | 6,88  | 10,33   | 0,62    |
| 3,44   | 3,47  | 0,92    | 0,21    |
| 0,81   | 0,83  | 1,06    | 0,57    |
| 35,81  | 59,20 | -3,08   | -0,09   |
| 2,83   | 1,64  | 4,07    | 0,59    |
| 2,57   | 2,39  | 0,54    | 0,17    |
| 4,31   | 4,28  | -0,29   | -0,07   |
| 4,63   | 4,68  | 0,68    | 0,13    |
| 9,79   | 8,15  | -0,88   | -0,10   |
| 0,90   | 1,76  | 1,04    | 0,54    |
| 2,29   | 2,59  | -0,17   | -0,08   |
| 4,47   | 5,46  | -0,19   | -0,04   |
| 7,22   | 7,44  | -1,45   | -0,25   |
| 6,41   | 6,22  | 0,41    | 0,06    |
| 7,95   | 8,77  | 0,55    | 0,06    |
| 5,18   | 6,11  | -0,75   | -0,17   |
| 3,29   | 3,66  | -0,56   | -0,21   |
| 7,31   | 6,03  | -1,65   | -0,29   |
| 2,02   | 2,92  | -0,24   | -0,13   |
| 6,25   | 5,66  | -0,76   | -0,14   |
| 4,52   | 3,66  | -0,71   | -0,19   |
| 1,64   | 1,66  | 0,19    | 0,10    |
| 5,52   | 4,95  | 0,03    | 0,01    |
| 4,23   | 4,02  | 0,55    | 0,12    |
| 2,49   | 2,05  | -0,70   | -0,39   |
| 2,86   | 2,54  | 0,50    | 0,15    |
| 2,67   | 1,88  | -1,06   | -0,66   |
| 2,07   | 1,83  | -0,33   | -0,19   |
| 4,37   | 4,46  | -1,04   | -0,31   |
| 1,92   | 4,26  | 0,70    | 0,27    |
| 1,91   | 3,13  | -0,80   | -0,72   |
| 3,32   | 3,52  | -1,14   | -0,52   |
| 3,46   | 3,78  | 0,70    | 0,17    |

[illegible]

|      |      |       |       |
|------|------|-------|-------|
| NAN  | NAN  | NAN   | NAN   |
| NAN  | NAN  | NAN   | NAN   |
| NAN  | NAN  | NAN   | NAN   |
| NAN  | NAN  | NAN   | NAN   |
| NAN  | NAN  | NAN   | NAN   |
| 2,82 | 2,08 | -0,39 | -0,16 |
| NAN  | NAN  | NAN   | NAN   |
| 1,37 | 2,36 | -0,08 | -0,06 |
| 4,79 | 4,47 | -1,00 | -0,26 |
| NAN  | NAN  | NAN   | NAN   |
| 2,19 | 1,26 | -0,74 | -0,51 |
| NAN  | NAN  | NAN   | NAN   |
| NAN  | NAN  | NAN   | NAN   |
| 1,79 | 1,99 | 0,06  | 0,03  |
| NAN  | NAN  | NAN   | NAN   |
| 7,90 | 9,09 | 0,54  | 0,06  |
| 1,56 | 2,00 | 0,16  | 0,09  |
| NAN  | NAN  | NAN   | NAN   |
| NAN  | NAN  | NAN   | NAN   |
| NAN  | NAN  | NAN   | NAN   |
| NAN  | NAN  | NAN   | NAN   |
| 2,93 | 3,77 | -0,41 | -0,16 |
| 2,67 | 2,31 | -0,75 | -0,39 |
| 2,74 | 2,75 | 0,15  | 0,05  |
| 2,03 | 5,22 | -0,04 | -0,02 |
| 1,33 | 1,49 | -0,20 | -0,18 |
| 4,06 | 4,64 | -0,03 | -0,01 |
| 3,60 | 4,62 | 0,20  | 0,05  |
| 3,44 | 4,16 | -1,01 | -0,42 |
| 4,26 | 3,34 | -0,26 | -0,06 |
| 5,52 | 5,81 | 0,69  | 0,11  |
| 4,96 | 4,14 | -1,77 | -0,55 |
| 3,43 | 4,72 | -0,44 | -0,15 |
| 3,10 | 3,66 | -1,16 | -0,60 |
| 3,07 | 2,43 | -0,13 | -0,04 |
| 2,27 | 2,29 | 0,02  | 0,01  |
| 2,76 | 2,89 | -0,56 | -0,25 |
| 2,04 | 2,20 | -0,05 | -0,03 |
| 1,90 | 1,64 | 0,19  | 0,09  |
| 4,10 | 5,17 | -0,04 | -0,01 |
| 4,14 | 4,03 | -0,81 | -0,24 |
| 3,52 | 4,05 | -0,43 | -0,14 |
| NAN  | NAN  | NAN   | NAN   |
| 1,31 | 1,73 | 0,26  | 0,17  |
| 2,21 | 2,17 | 0,06  | 0,03  |
| 2,50 | 3,20 | -0,20 | -0,09 |
| 2,41 | 1,72 | -1,23 | -1,04 |
| 4,39 | 4,88 | -1,08 | -0,33 |
| 4,79 | 3,69 | -2,29 | -0,92 |
| NAN  | NAN  | NAN   | NAN   |

|        |        |         |         |
|--------|--------|---------|---------|
| 3,54   | 8,36   | -1,54   | -0,77   |
| 3,11   | 4,13   | -0,90   | -0,41   |
| 2,65   | 3,50   | -0,57   | -0,27   |
| 1,91   | 2,00   | -0,07   | -0,04   |
| NAN    | NAN    | NAN     | NAN     |
| 1,91   | 1,69   | -0,51   | -0,36   |
| 3,61   | 1,58   | -1,37   | -0,61   |
| 1,30   | 1,07   | -0,12   | -0,10   |
| 3,79   | 6,39   | -1,06   | -0,39   |
| 0,22   | 0,22   | 0,00    | 0,00    |
| NAN    | NAN    | NAN     | NAN     |
| 0,92   | 1,24   | -0,70   | -3,18   |
| 2,46   | 4,44   | -2,45   | -245,00 |
| 1,12   | 1,42   | -0,90   | -4,09   |
| 4,13   | 2,81   | -3,05   | -2,82   |
| NAN    | NAN    | NAN     | NAN     |
| NAN    | NAN    | NAN     | NAN     |
| NAN    | NAN    | NAN     | NAN     |
| NAN    | NAN    | NAN     | NAN     |
| NAN    | NAN    | NAN     | NAN     |
| NAN    | NAN    | NAN     | NAN     |
| NAN    | NAN    | NAN     | NAN     |
| NAN    | NAN    | NAN     | NAN     |
| NAN    | NAN    | NAN     | NAN     |
| 2,66   | 2,31   | -0,83   | -0,45   |
| 3,18   | 7,59   | 0,19    | 0,06    |
| 5,10   | 4,02   | -0,54   | -0,12   |
| 7,60   | 8,62   | -0,10   | -0,01   |
| NAN    | NAN    | NAN     | NAN     |
| NAN    | NAN    | NAN     | NAN     |
| 3,22   | 3,36   | -0,11   | -0,04   |
| 1,97   | 269,00 | 0,28    | 0,12    |
| 4,37   | 4,31   | -0,53   | -0,14   |
| NAN    | NAN    | NAN     | NAN     |
| NAN    | NAN    | NAN     | NAN     |
| 2,20   | 2,77   | -0,02   | -0,01   |
| 1,41   | 1,64   | 0,27    | 0,16    |
| 2,30   | 2,52   | 2,93    | 0,56    |
| 2,16   | 2,83   | 0,36    | 0,14    |
| 1,84   | 1,11   | 0,44    | 0,19    |
| 114,00 | 2,28   | -112,28 | -65,28  |
| NAN    | NAN    | NAN     | NAN     |
| 1,63   | 1,53   | 0,06    | 0,04    |
| 1,58   | 1,96   | 0,36    | 0,19    |
| 1,16   | 1,98   | 0,20    | 0,15    |
| 1,87   | 2,16   | 0,12    | 0,06    |
| 2,28   | 3,52   | 0,22    | 0,09    |
| NAN    | NAN    | NAN     | NAN     |
| NAN    | NAN    | NAN     | NAN     |
| NAN    | NAN    | NAN     | NAN     |
| NAN    | NAN    | NAN     | NAN     |

|      |      |       |       |
|------|------|-------|-------|
| 1,80 | 2,66 | 0,27  | 0,13  |
| 2,66 | 5,09 | 0,59  | 0,18  |
| 0,93 | 1,57 | 0,18  | 0,16  |
| 0,83 | 1,59 | 0,94  | 0,53  |
| 1,55 | 2,36 | 0,48  | 0,24  |
| 2,19 | 2,64 | -0,05 | -0,02 |
| 2,69 | 0,96 | -0,46 | -0,21 |
| 1,30 | 1,79 | 0,07  | 0,05  |
| 2,34 | 2,99 | 0,13  | 0,05  |
| 2,68 | 3,58 | 0,40  | 0,13  |
| 2,10 | 2,40 | 0,02  | 0,01  |
| 2,68 | 3,33 | 0,70  | 0,21  |
| NAN  | NAN  | NAN   | NAN   |
| NAN  | NAN  | NAN   | NAN   |
| NAN  | NAN  | NAN   | NAN   |
| NAN  | NAN  | NAN   | NAN   |

| TNF alpha increase 2 yrs PD | TNF alpha change 2 yrs PD | BMI (Kg/m2) 2 yrs PD | WC (cm) 2 yrs PD |
|-----------------------------|---------------------------|----------------------|------------------|
| -0,45                       | -0,21                     | 19,80                | 65,00            |
| 1,83                        | 0,50                      | 22,68                | 82,00            |
| -0,22                       | -0,06                     | 22,85                | 79,00            |
| -1,57                       | -0,53                     | 31,60                | 99,00            |
| 0,55                        | 0,16                      | 22,57                | 80,00            |
| -3,54                       | -2,42                     | 17,80                | 67,50            |
| -0,52                       | -0,20                     | NAN                  | NAN              |
| -0,10                       | -0,07                     | 30,03                | NAN              |
| 0,72                        | 0,15                      | 26,23                | 80,00            |
| -2,26                       | -0,89                     | 38,60                | 105,00           |
| -1,49                       | -1,39                     | 19,60                | 66,00            |
| 0,02                        | 0,01                      | 30,60                | 92,00            |
| -0,69                       | -0,93                     | 21,79                | 76,50            |
| -0,83                       | -0,31                     | 35,70                | 117,00           |
| -0,43                       | -0,10                     | 18,49                | 61,00            |
| -0,88                       | -0,35                     | 21,04                | 69,00            |
| -0,60                       | -0,21                     | 19,60                | 63,00            |
| -1,46                       | -0,34                     | 21,30                | 69,00            |
| 10,72                       | 0,60                      | 24,34                | 85,00            |
| 4,30                        | 0,36                      | 23,20                | 90,00            |
| 2,70                        | 0,57                      | 20,43                | 66,00            |
| 3,69                        | 0,41                      | 30,00                | 103,00           |
| -1,85                       | -0,38                     | 31,30                | 89,00            |
| -1,94                       | -0,37                     | 20,21                | 77,00            |
| -0,28                       | -0,05                     | 31,62                | 100,00           |
| -0,79                       | -0,14                     | NAN                  | NAN              |
| 2,15                        | 0,36                      | 23,50                | 80,00            |
| 0,34                        | 0,05                      | 28,51                | 91,00            |
| -0,31                       | -0,24                     | 18,70                | 63,00            |
| 10,76                       | 0,70                      | 21,66                | 83,00            |
| -2,18                       | -0,23                     | 27,57                | 98,00            |
| 6,93                        | 0,59                      | 20,34                | NAN              |
| 0,26                        | 0,06                      | 26,80                | 84,00            |
| 0,80                        | 0,24                      | 27,92                | 86,00            |
| 1,54                        | 0,36                      | 22,00                | 72,00            |
| 0,00                        | 0,00                      | 24,04                | 81,00            |
| 0,27                        | 0,10                      | 19,60                | 68,00            |
| -0,96                       | -0,60                     | 32,10                | 93,00            |
| -1,38                       | -0,28                     | NAN                  | NAN              |
| -0,72                       | -0,20                     | 25,01                | 82,00            |
| 0,47                        | 0,10                      | 25,51                | 78,00            |
| -0,33                       | -0,13                     | 26,61                | 91,00            |
| -0,79                       | -0,15                     | 23,13                | 77,00            |
| 2,14                        | 0,49                      | 21,90                | 84,00            |
| -0,38                       | -0,16                     | 21,53                | 77,50            |
| -0,77                       | -0,21                     | 26,00                | 88,00            |
| 1,60                        | 0,35                      | 19,31                | 66,00            |

|       |       |       |        |
|-------|-------|-------|--------|
| -1,53 | -0,63 | 23,37 | 80,00  |
| -0,62 | -0,20 | 24,52 | 82,00  |
| 0,00  | 0,00  | 23,55 | 77,50  |
| 0,09  | 0,02  | 30,20 | 103,00 |
| 0,96  | 0,33  | 18,67 | 68,00  |
| 0,41  | 0,13  | 24,20 | 73,00  |
| -1,56 | -0,42 | 23,71 | 82,00  |
| NAN   | NAN   | NAN   | 77,00  |
| -0,19 | -0,11 | 22,80 | 76,00  |
| -1,33 | -0,54 | 25,19 | 79,00  |
| -0,49 | -0,22 | 23,87 | 73,00  |
| -1,38 | -0,65 | 25,05 | 74,00  |
| -0,99 | -0,37 | 26,72 | 84,00  |
| 0,13  | 0,04  | 21,60 | 79,00  |
| -0,77 | -0,22 | 25,86 | 89,00  |
| NAN   | NAN   | 25,62 | 83,50  |
| 0,55  | 0,24  | 25,71 | 85,00  |
| -1,85 | -0,43 | 19,10 | 77,00  |
| -2,06 | -0,40 | 28,10 | 95,00  |
| 2,32  | 0,51  | 22,50 | 86,50  |
| -1,79 | -0,74 | 21,10 | 73,00  |
| -0,55 | -0,12 | 21,50 | 82,00  |
| -0,68 | -0,24 | 27,52 | 93,50  |
| -3,16 | -0,70 | 22,60 | 74,00  |
| 0,05  | 0,01  | 51,56 | 120,00 |
| -1,51 | -0,58 | 28,29 | 91,50  |
| -0,37 | -0,36 | 19,41 | 67,50  |
| -0,48 | -0,12 | NAN   | NAN    |
| 0,59  | 0,26  | 24,13 | 75,00  |
| -3,98 | -1,60 | 25,50 | 83,50  |
| -0,55 | -0,19 | 21,19 | 71,00  |
| -0,95 | -0,30 | 27,50 | 94,00  |
| -0,95 | -0,36 | 24,30 | 97,80  |
| -0,40 | -0,20 | 25,36 | 96,00  |
| -0,73 | -0,16 | NAN   | NAN    |
| 0,52  | 0,18  | 19,18 | 68,00  |
| -0,48 | -0,27 | 22,10 | 75,00  |
| -0,38 | -0,13 | 25,00 | 84,00  |
| -0,16 | -0,05 | 32,42 | 103,00 |
| -1,04 | -0,61 | 19,76 | 73,00  |
| 0,70  | 0,99  | 18,80 | 71,00  |
| -0,43 | -0,18 | 29,49 | 92,00  |
| -0,47 | -0,10 | 33,33 | 98,50  |
| -0,76 | -0,36 | 21,00 | 73,00  |
| 0,12  | 0,13  | 24,00 | 73,00  |
| NAN   | NAN   | NAN   | NAN    |
| -2,73 | -3,74 | 18,38 | 68,00  |
| 0,00  | 0,00  | 20,42 | 73,00  |
| 0,77  | 0,27  | 25,40 | 84,50  |
| 0,08  | 0,04  | NAN   | NAN    |



|        |       |       |        |
|--------|-------|-------|--------|
| 0,08   | 0,03  | 19,19 | 73,00  |
| -0,91  | -0,80 | 14,37 | 65,00  |
| 0,58   | 0,26  | 22,36 | 79,00  |
| -0,25  | -0,14 | 18,24 | 72,00  |
| -0,41  | -0,20 | 22,80 | 78,50  |
| -0,05  | -0,06 | 21,80 | 77,00  |
| 0,33   | 0,16  | 21,37 | 66,00  |
| -0,04  | -0,02 | 23,00 | 83,00  |
| -0,99  | -0,30 | 27,16 | 91,50  |
| NAN    | NAN   | 23,90 | 72,00  |
| -0,29  | -0,17 | 27,69 | 80,00  |
| -1,23  | -0,85 | 26,60 | 84,00  |
| 0,76   | 0,99  | 22,60 | 69,00  |
| 0,65   | 0,25  | 21,40 | 81,50  |
| -0,23  | -0,10 | 29,40 | 90,00  |
| 0,91   | 0,36  | 25,15 | 81,00  |
| NAN    | NAN   | 18,70 | 68,50  |
| 9,73   | 0,59  | 17,30 | 65,00  |
| 0,89   | 0,20  | 18,30 | 66,00  |
| 1,04   | 0,56  | 21,30 | 79,00  |
| -26,47 | -0,81 | 21,19 | 70,00  |
| 5,26   | 0,76  | 27,70 | 86,00  |
| 0,72   | 0,23  | 25,11 | 76,00  |
| -0,26  | -0,06 | NAN   | NAN    |
| 0,63   | 0,12  | 26,94 | 83,00  |
| 0,76   | 0,09  | NAN   | 63,50  |
| 0,18   | 0,09  | 16,56 | 62,00  |
| -0,47  | -0,22 | 23,40 | 84,00  |
| -1,18  | -0,28 | 34,91 | 113,00 |
| -1,67  | -0,29 | 16,23 | 68,00  |
| 0,60   | 0,09  | 28,70 | 109,00 |
| -0,27  | -0,03 | 21,29 | 93,00  |
| -1,68  | -0,38 | 19,80 | 72,00  |
| -0,93  | -0,34 | 21,00 | 73,00  |
| -0,37  | -0,07 | 28,20 | 88,00  |
| -1,14  | -0,64 | 21,38 | 74,50  |
| -0,17  | -0,03 | 32,37 | 102,00 |
| 0,15   | 0,04  | 25,00 | NAN    |
| 0,17   | 0,09  | 23,00 | 73,00  |
| 0,60   | 0,11  | 26,85 | 90,00  |
| 0,76   | 0,16  | NAN   | 88,00  |
| -0,26  | -0,15 | 33,50 | 98,50  |
| 0,82   | 0,24  | 25,00 | 97,00  |
| -0,27  | -0,17 | NAN   | NAN    |
| -0,09  | -0,05 | 29,27 | 89,50  |
| -1,13  | -0,34 | 24,33 | 89,00  |
| -1,64  | -0,63 | 22,37 | 81,00  |
| -2,02  | -1,82 | 24,70 | 88,50  |
| -1,34  | -0,61 | 23,63 | 89,50  |
| 0,38   | 0,09  | 29,79 | 100,00 |

|        |       |       |        |
|--------|-------|-------|--------|
| 0,13   | 0,07  | 20,44 | 71,00  |
| 2,87   | 0,61  | 21,10 | 78,00  |
| -1,11  | -0,69 | 20,60 | 67,00  |
| -1,10  | -0,89 | 19,00 | 73,00  |
| 2,27   | 0,41  | 27,98 | 91,00  |
| 2,96   | 0,41  | 22,43 | 73,00  |
| 1,00   | 0,27  | 18,42 | 63,00  |
| -0,38  | -0,24 | 19,58 | 71,00  |
| -0,57  | -0,28 | 26,00 | 89,00  |
| -0,38  | -0,40 | 22,70 | 76,00  |
| -1,09  | -1,76 | NAN   | NAN    |
| -0,13  | -0,09 | 21,60 | 71,00  |
| -0,17  | -0,15 | 20,22 | 77,00  |
| -16,80 | -8,94 | 27,60 | 88,50  |
| -0,50  | -0,86 | NAN   | 62,00  |
| -0,87  | -1,61 | 37,30 | 114,00 |
| 0,02   | 0,01  | 25,80 | 86,50  |
| -0,52  | -0,44 | 25,58 | 83,00  |
| 0,69   | 0,16  | 28,90 | 96,00  |
| -2,09  | -0,67 | 25,50 | 86,00  |
| -0,21  | -0,09 | 26,26 | 98,00  |
| -1,05  | -0,43 | 23,20 | 84,00  |
| 0,04   | 0,02  | NAN   | NAN    |
| -1,28  | -0,71 | 23,70 | 76,00  |
| -0,08  | -0,02 | 24,98 | 94,00  |
| -0,24  | -0,16 | 20,10 | 91,00  |
| -0,67  | -0,42 | 18,70 | 66,50  |
| -0,37  | -0,11 | 19,50 | 71,50  |
| -0,13  | -0,11 | 27,30 | 91,00  |
| 0,84   | 0,25  | 24,89 | 82,00  |
| -0,29  | -0,11 | NAN   | NAN    |
| -0,49  | -0,12 | 22,74 | 95,00  |
| -1,62  | -0,46 | 21,80 | 79,00  |
| 0,00   | 0,00  | 20,31 | 84,00  |
| 2,51   | 0,45  | 25,40 | 76,50  |
| -0,63  | -0,20 | 21,70 | 70,50  |
| -2,23  | -1,39 | 25,00 | 97,00  |
| 0,00   | 0,00  | 28,60 | 92,00  |
| -0,46  | -0,19 | 24,12 | 81,00  |
| 0,31   | 0,05  | NAN   | NAN    |
| 0,77   | 0,48  | 18,96 | 74,00  |
| -0,27  | -0,11 | 27,10 | 98,00  |
| NAN    | NAN   | 20,39 | 76,00  |
| NAN    | NAN   | 20,08 | 79,00  |
| NAN    | NAN   | 25,70 | 84,00  |
| NAN    | NAN   | NAN   | 85,00  |
| NAN    | NAN   | 28,00 | 87,00  |
| NAN    | NAN   | 20,70 | 70,00  |
| NAN    | NAN   | 20,00 | 64,50  |
| NAN    | NAN   | 22,46 | 79,00  |

|       |       |       |        |
|-------|-------|-------|--------|
| NAN   | NAN   | 34,62 | 109,00 |
| NAN   | NAN   | 21,05 | 77,00  |
| NAN   | NAN   | 26,17 | 92,00  |
| NAN   | NAN   | 25,28 | 85,00  |
| NAN   | NAN   | 23,80 | 87,50  |
| 0,35  | 0,14  | 26,60 | 86,00  |
| NAN   | NAN   | 26,44 | 106,00 |
| -1,07 | -0,83 | 33,72 | 107,00 |
| -0,68 | -0,18 | 21,33 | 72,50  |
| NAN   | NAN   | 21,79 | 76,50  |
| 0,19  | 0,13  | 22,10 | 69,00  |
| NAN   | NAN   | 26,91 | 98,00  |
| NAN   | NAN   | 23,27 | 77,50  |
| -0,14 | -0,08 | NAN   | NAN    |
| NAN   | NAN   | 18,59 | 64,00  |
| -0,65 | -0,08 | NAN   | NAN    |
| -0,28 | -0,16 | 28,40 | 97,00  |
| NAN   | NAN   | 20,20 | 68,00  |
| NAN   | NAN   | NAN   | NAN    |
| NAN   | NAN   | 29,40 | 87,50  |
| NAN   | NAN   | 30,60 | 96,00  |
| -1,25 | -0,50 | 18,50 | 68,00  |
| -0,39 | -0,20 | 25,75 | 98,00  |
| 0,14  | 0,05  | 18,90 | NAN    |
| -3,23 | -1,62 | 32,50 | 96,00  |
| -0,36 | -0,32 | 28,00 | 96,00  |
| -0,61 | -0,15 | 23,80 | 81,50  |
| -0,82 | -0,22 | 38,40 | 115,00 |
| -1,73 | -0,71 | 26,60 | 85,00  |
| 0,66  | 0,17  | NAN   | NAN    |
| 0,40  | 0,06  | 21,69 | 72,00  |
| -0,95 | -0,30 | 21,30 | 82,00  |
| -1,73 | -0,58 | 19,10 | 77,00  |
| -1,72 | -0,89 | NAN   | 77,50  |
| 0,51  | 0,17  | 21,80 | 82,00  |
| 0,00  | 0,00  | 25,30 | 86,50  |
| -0,69 | -0,31 | 19,44 | 85,00  |
| -0,21 | -0,11 | 21,10 | 76,50  |
| 0,45  | 0,22  | NAN   | NAN    |
| -1,11 | -0,27 | 22,25 | 86,50  |
| -0,70 | -0,21 | 21,50 | 75,00  |
| -0,96 | -0,31 | 25,10 | 86,50  |
| NAN   | NAN   | 25,30 | 86,50  |
| -0,16 | -0,10 | 21,06 | 74,00  |
| 0,10  | 0,04  | 24,04 | 81,00  |
| -0,90 | -0,39 | NAN   | NAN    |
| -0,54 | -0,46 | NAN   | 104,00 |
| -1,57 | -0,47 | 25,30 | 91,00  |
| -1,19 | -0,48 | NAN   | NAN    |
| NAN   | NAN   | 29,30 | 100,00 |

|         |         |       |        |
|---------|---------|-------|--------|
| -6,36   | -3,18   | 24,60 | 82,60  |
| -1,92   | -0,87   | 25,70 | 84,00  |
| -1,42   | -0,68   | 32,20 | 107,50 |
| -0,16   | -0,09   | 25,45 | NAN    |
| NAN     | NAN     | NAN   | NAN    |
| -0,29   | -0,21   | 21,70 | 70,00  |
| 0,66    | 0,29    | 21,40 | 72,00  |
| 0,11    | 0,09    | 22,18 | 82,00  |
| -3,66   | -1,34   | 21,80 | 75,00  |
| 0,00    | 0,00    | 29,74 | NAN    |
| NAN     | NAN     | 29,30 | 85,00  |
| -1,02   | -4,64   | NAN   | NAN    |
| -4,43   | -443,00 | 20,12 | 75,00  |
| -1,20   | -5,45   | 22,30 | 79,50  |
| -1,73   | -1,60   | NAN   | NAN    |
| NAN     | NAN     | NAN   | NAN    |
| NAN     | NAN     | NAN   | NAN    |
| NAN     | NAN     | NAN   | NAN    |
| NAN     | NAN     | 22,30 | 78,50  |
| NAN     | NAN     | NAN   | NAN    |
| NAN     | NAN     | NAN   | NAN    |
| NAN     | NAN     | 23,80 | 81,00  |
| NAN     | NAN     | 27,10 | 76,50  |
| -0,48   | -0,26   | 31,80 | 99,50  |
| -4,22   | -1,25   | 21,80 | NAN    |
| 0,54    | 0,12    | NAN   | NAN    |
| -1,12   | -0,15   | 36,73 | NAN    |
| NAN     | NAN     | 21,04 | 73,50  |
| NAN     | NAN     | 22,60 | 73,50  |
| -0,25   | -0,08   | 28,90 | 90,00  |
| -266,75 | -118,56 | 22,40 | 69,00  |
| -0,47   | -0,12   | NAN   | NAN    |
| NAN     | NAN     | 25,50 | 89,50  |
| NAN     | NAN     | 25,60 | 86,00  |
| -0,59   | -0,27   | NAN   | NAN    |
| 0,04    | 0,02    | NAN   | NAN    |
| 2,71    | 0,52    | NAN   | NAN    |
| -0,31   | -0,12   | 23,70 | 76,00  |
| 1,17    | 0,51    | 29,49 | 93,50  |
| -0,56   | -0,33   | NAN   | NAN    |
| NAN     | NAN     | NAN   | NAN    |
| 0,16    | 0,09    | 21,70 | 74,50  |
| -0,02   | -0,01   | NAN   | NAN    |
| -0,62   | -0,46   | 23,70 | 80,00  |
| -0,17   | -0,09   | NAN   | NAN    |
| -1,02   | -0,41   | NAN   | NAN    |
| NAN     | NAN     | 18,90 | 65,00  |
| NAN     | NAN     | NAN   | NAN    |
| NAN     | NAN     | 18,10 | 65,00  |
| NAN     | NAN     | NAN   | NAN    |

|       |       |       |       |
|-------|-------|-------|-------|
| -0,59 | -0,29 | 26,50 | 81,50 |
| -1,84 | -0,57 | 24,00 | 82,50 |
| -0,46 | -0,41 | 24,43 | NAN   |
| 0,18  | 0,10  | 21,00 | 75,00 |
| -0,33 | -0,16 | NAN   | NAN   |
| -0,50 | -0,23 | 25,30 | 80,00 |
| 1,27  | 0,57  | 33,70 | 91,00 |
| -0,42 | -0,31 | 23,50 | 76,00 |
| -0,52 | -0,21 | 25,38 | NAN   |
| -0,50 | -0,16 | 29,13 | 87,00 |
| -0,28 | -0,13 | NAN   | NAN   |
| 0,05  | 0,01  | NAN   | NAN   |
| NAN   | NAN   | NAN   | NAN   |
| NAN   | NAN   | 33,74 | NAN   |
| NAN   | NAN   | 20,35 | 80,00 |
| NAN   | NAN   | 35,80 | 96,00 |

| Resting Energy (Kcal/day) 2 Yrs PD | Total Energy (Kcal/day) 2 Yrs PD | Fat mass ( Kg)<br>2 Yrs PD |
|------------------------------------|----------------------------------|----------------------------|
| 1273                               | 2291                             | 12,35                      |
| 1341                               | 2146                             | 21,86                      |
| 1382                               | 2488                             | 21,44                      |
| 1570                               | 2513                             | 32,34                      |
| 1345                               | 2421                             | 19,56                      |
| 1195                               | 2155                             | 8,16                       |
| NAN                                | NAN                              | NAN                        |
| 1526                               | 2442                             | 36,89                      |
| 1371                               | 2468                             | 24,78                      |
| 1590                               | 2861                             | 41,10                      |
| 1171                               | 1873                             | 14,44                      |
| 1555                               | 2488                             | 38,44                      |
| 1271                               | 2034                             | 14,83                      |
| 1733                               | 2773                             | 48,78                      |
| 1289                               | 2321                             | 8,86                       |
| 1267                               | 2281                             | 13,77                      |
| 1284                               | 2312                             | 16,63                      |
| 1305                               | 2349                             | 14,28                      |
| 1404                               | 2246                             | 24,28                      |
| 1412                               | 2259                             | 23,05                      |
| NAN                                | NAN                              | NAN                        |
| 1439                               | 2591                             | 29,29                      |
| NAN                                | NAN                              | 34,37                      |
| 1320                               | 2376                             | 14,60                      |
| 1512                               | 2116                             | 34,65                      |
| NAN                                | NAN                              | NAN                        |
| 1397                               | 2514                             | 23,74                      |
| 1555                               | 2799                             | 36,34                      |
| 1237                               | 2227                             | 14,30                      |
| 1356                               | 2169                             | 21,77                      |
| 1412                               | 2542                             | 28,25                      |
| 1318                               | 1845                             | 18,73                      |
| 1383                               | 2490                             | 25,20                      |
| 1501                               | 2702                             | 31,88                      |
| 1338                               | 2140                             | 19,87                      |
| 1327                               | 2389                             | 17,48                      |
| 1254                               | 2023                             | 12,01                      |
| 1599                               | 2878                             | 38,75                      |
| NAN                                | NAN                              | NAN                        |
| 1399                               | 2239                             | 27,17                      |
| 1370                               | 1918                             | 3,40                       |
| 1372                               | 2469                             | 25,11                      |
| NAN                                | NAN                              | NAN                        |
| 1296                               | 2333                             | 17,44                      |
| 1369                               | 2191                             | 22,08                      |
| 1386                               | 2496                             | 27,10                      |
| NAN                                | NAN                              | NAN                        |

|      |      |       |
|------|------|-------|
| 1314 | 2365 | 16,22 |
| 1388 | 2221 | 21,83 |
| 1380 | 2484 | 18,99 |
| 1481 | 2073 | 33,88 |
| 1224 | 1959 | 12,20 |
| 1345 | 2422 | 21,34 |
| 1358 | 2444 | 21,05 |
| NAN  | NAN  | NAN   |
| 1381 | 2210 | 21,18 |
| 1329 | 2376 | 13,79 |
| 1374 | 2198 | 20,24 |
| 1303 | 2085 | 18,71 |
| 1423 | 2561 | 27,33 |
| 1274 | 2293 | 13,50 |
| 1419 | 2555 | 21,14 |
| 1359 | 2446 | 24,62 |
| 1414 | 2263 | 26,21 |
| 1310 | 2357 | 16,99 |
| 1395 | 2231 | 28,67 |
| NAN  | NAN  | 16,32 |
| 1314 | 2365 | 21,17 |
| 1321 | 2378 | 19,07 |
| 1418 | 2269 | 28,55 |
| 1288 | 2318 | 14,73 |
| 2826 | 5088 | 84,22 |
| 1525 | 2746 | 32,39 |
| 1234 | 2222 | 11,10 |
| NAN  | NAN  | NAN   |
| 1379 | 2483 | 19,88 |
| 1419 | 2255 | 22,05 |
| NAN  | NAN  | NAN   |
| 1372 | 2470 | 24,44 |
| 1395 | 2515 | 23,95 |
| 1441 | 2594 | 26,26 |
| NAN  | NAN  | NAN   |
| 1260 | 2267 | 13,95 |
| 1244 | 1996 | NAN   |
| 1327 | 2389 | 19,44 |
| 1454 | 2618 | 32,11 |
| NAN  | NAN  | NAN   |
| 1236 | 2226 | 13,17 |
| 1459 | 2335 | 33,41 |
| 1488 | 2678 | 35,19 |
| 1283 | 2050 | 13,39 |
| NAN  | NAN  | 19,00 |
| NAN  | NAN  | NAN   |
| 1282 | 2052 | 10,25 |
| 1297 | 2335 | 16,90 |
| 1361 | 2178 | 21,76 |
| NAN  | NAN  | NAN   |

|      |      |       |
|------|------|-------|
| 1281 | 2050 | 13,33 |
| 1139 | 2277 | 6,43  |
| 1378 | 2480 | 17,56 |
| 1205 | 2168 | 10,84 |
| 1319 | 2374 | 18,25 |
| 1234 | 1975 | 16,74 |
| 1314 | 2366 | 14,86 |
| 1318 | 2109 | 20,83 |
| 1316 | 2369 | 19,95 |
| 1343 | 2419 | 19,79 |
| 1524 | 2743 | 24,51 |
| 1413 | 2544 | 28,41 |
| 1484 | 2671 | 15,95 |
| 1331 | 2129 | 14,95 |
| 1426 | 2567 | 12,40 |
| 1327 | 2389 | 21,85 |
| 1249 | 1999 | 12,76 |
| NAN  | NAN  | NAN   |
| 1237 | 1979 | 9,14  |
| 1313 | 2364 | 9,52  |
| 1303 | 2346 | 17,05 |
| 1512 | 2721 | 31,00 |
| 1401 | 2242 | 23,20 |
| NAN  | NAN  | NAN   |
| 1385 | 2493 | 26,64 |
| 1213 | 2183 | 10,01 |
| 1234 | 2222 | 9,17  |
| 1352 | 2433 | 20,86 |
| 1484 | 2671 | 32,01 |
| 1264 | 2275 | 12,21 |
| 1536 | 2457 | 35,63 |
| NAN  | NAN  | NAN   |
| 1317 | 2370 | 12,99 |
| 1307 | 2357 | 15,06 |
| 1362 | 2451 | 24,48 |
| 1307 | 2091 | 16,80 |
| 1502 | 2704 | 35,90 |
| 1314 | 2365 | 19,72 |
| 1368 | 2189 | 22,85 |
| 1601 | 2561 | NAN   |
| NAN  | NAN  | NAN   |
| 1822 | 3279 | 39,83 |
| 1406 | 2249 | 23,06 |
| NAN  | NAN  | NAN   |
| 1501 | 2402 | 33,55 |
| 1339 | 2143 | 23,54 |
| 1346 | 2423 | 20,10 |
| 1310 | 2357 | 20,40 |
| 1427 | 2569 | 21,38 |
| 1465 | 2637 | 28,10 |



|      |      |       |
|------|------|-------|
| 1219 | 2195 | 13,69 |
| 1371 | 2194 | 19,95 |
| 1312 | 2362 | 13,08 |
| 1246 | 1994 | 14,22 |
| 1457 | 2623 | 31,58 |
| 1272 | 2544 | 13,43 |
| 1268 | 2283 | 12,04 |
| 1289 | 2063 | 13,50 |
| 1449 | 2319 | 21,60 |
| 1355 | 2438 | 19,54 |
| NAN  | NAN  | NAN   |
| 1301 | 2082 | 14,82 |
| 1293 | 2327 | 16,81 |
| 1405 | 2530 | 24,65 |
| 1266 | 2279 | 12,24 |
| 1651 | 2641 | 37,50 |
| 1373 | 2471 | 25,60 |
| 1412 | 2259 | 24,59 |
| 1459 | 2645 | 30,59 |
| 1370 | 2192 | 29,44 |
| 1427 | 2568 | 26,50 |
| 1329 | 1861 | 16,14 |
| NAN  | NAN  | NAN   |
| 1279 | 2047 | 18,52 |
| 1398 | NAN  | 26,22 |
| 1316 | 1843 | 15,65 |
| 2313 | 1285 | 13,85 |
| 1293 | 2063 | 15,72 |
| 1450 | 2610 | 28,51 |
| 1524 | 2743 | 15,29 |
| NAN  | NAN  | NAN   |
| 1295 | 2332 | 17,30 |
| 1369 | 2190 | 18,70 |
| 1273 | 2292 | 6,10  |
| 1382 | 2487 | 26,60 |
| 1316 | 2105 | 14,88 |
| 1392 | 2506 | 21,43 |
| 1440 | 2592 | 29,09 |
| 1360 | 2448 | 23,32 |
| NAN  | NAN  | NAN   |
| 1260 | 2268 | 12,50 |
| 1520 | 2750 | 31,42 |
| 1319 | 2116 | 14,75 |
| 1284 | 2312 | 19,16 |
| 1441 | 2306 | 25,40 |
| 1299 | 2339 | NAN   |
| 1357 | 2400 | 23,29 |
| 2077 | 1298 | 15,80 |
| 1255 | 2259 | 13,84 |
| 1313 | 1838 | 16,89 |

|      |      |       |
|------|------|-------|
| 1500 | 2700 | 38,84 |
| 1311 | 2098 | 17,86 |
| 1318 | 2108 | 20,90 |
| 1434 | 2580 | 22,49 |
| 1285 | 2313 | 17,00 |
| 1345 | 2421 | 21,45 |
| NAN  | NAN  | 25,98 |
| 2948 | 1638 | 44,80 |
| 1289 | 2321 | 17,38 |
| 1288 | 2060 | 15,05 |
| 1294 | 2330 | 17,29 |
| 1405 | 2530 | 27,49 |
| 1345 | 2152 | 22,43 |
| NAN  | NAN  | NAN   |
| 1257 | 2011 | 14,10 |
| NAN  | NAN  | NAN   |
| 1378 | 2480 | 25,30 |
| 1301 | 2343 | 14,20 |
| NAN  | NAN  | NAN   |
| 1473 | 2651 | 28,54 |
| 1459 | 2626 | 32,76 |
| 1220 | 2196 | 6,20  |
| NAN  | NAN  | NAN   |
| 1452 | 2614 | 6,12  |
| 1514 | 2422 | 35,97 |
| 1391 | 2504 | 24,20 |
| 1305 | 2088 | 19,79 |
| 1571 | 2826 | 43,60 |
| 1484 | 2375 | 31,06 |
| NAN  | NAN  | NAN   |
| 1286 | 2057 | 15,99 |
| 1328 | 1860 | 15,27 |
| 1337 | 2139 | 20,50 |
| NAN  | NAN  | NAN   |
| 1308 | 2354 | 15,90 |
| 1378 | 2480 | 24,90 |
| 1332 | 2397 | 14,33 |
| 1226 | 2207 | 14,20 |
| NAN  | NAN  | NAN   |
| 1280 | 2304 | 16,45 |
| 1293 | 2327 | 17,80 |
| 1249 | 2338 | 17,10 |
| 1339 | 2410 | 21,80 |
| 1306 | 2351 | 15,62 |
| 1309 | 2503 | 24,11 |
| NAN  | NAN  | NAN   |
| 1570 | 2826 | 32,80 |
| 1384 | 2215 | 24,00 |
| NAN  | NAN  | NAN   |
| 1455 | 2619 | 29,73 |

|      |      |       |
|------|------|-------|
| 1308 | 2354 | 20,40 |
| 1581 | 2842 | 20,40 |
| 1520 | 2433 | 36,13 |
| NAN  | NAN  | NAN   |
| NAN  | NAN  | NAN   |
| 1360 | 2176 | 16,42 |
| 1308 | 2092 | 18,05 |
| 1251 | 2252 | 15,30 |
| 1419 | 2555 | 17,47 |
| NAN  | NAN  | NAN   |
| 1417 | 2550 | 29,01 |
| NAN  | NAN  | NAN   |
| 1280 | 2048 | 13,85 |
| 1287 | 2317 | 16,88 |
| NAN  | NAN  | NAN   |
| 1369 | 2190 | 21,30 |
| NAN  | NAN  | NAN   |
| NAN  | NAN  | NAN   |
| 1365 | 2457 | 19,70 |
| 1446 | 2603 | 26,20 |
| 1528 | 2445 | 38,60 |
| 1362 | 2180 | 19,10 |
| NAN  | NAN  | NAN   |
| NAN  | NAN  | NAN   |
| 1225 | 2205 | 10,42 |
| 2106 | 1317 | 20,50 |
| 1389 | 2222 | 28,70 |
| 1296 | 2074 | 15,50 |
| NAN  | NAN  | NAN   |
| 1375 | 2475 | 21,34 |
| 1461 | 2338 | 32,16 |
| NAN  | NAN  | NAN   |
| NAN  | NAN  | NAN   |
| NAN  | NAN  | NAN   |
| 1543 | 2314 | 16,10 |
| 1506 | 2711 | 34,36 |
| NAN  | NAN  | NAN   |
| NAN  | NAN  | NAN   |
| 1351 | 2431 | 20,40 |
| NAN  | NAN  | NAN   |
| 1332 | 2132 | 22,50 |
| NAN  | NAN  | NAN   |
| NAN  | NAN  | NAN   |
| 1259 | 2014 | 10,30 |
| NAN  | NAN  | NAN   |
| 1244 | 1991 | 10,90 |
| NAN  | NAN  | NAN   |

|      |      |       |
|------|------|-------|
| 1362 | 2452 | 19,60 |
| 1438 | 2301 | 27,50 |
| NAN  | NAN  | NAN   |
| 1321 | 2114 | 15,08 |
| NAN  | NAN  | NAN   |
| 1377 | 2204 | 21,10 |
| 1600 | 2880 | 41,50 |
| 1379 | 2206 | 19,90 |
| NAN  | NAN  | NAN   |
| 1467 | 2640 | 26,00 |
| NAN  | NAN  | NAN   |
| 1258 | 2265 | 10,01 |
| 1544 | 2779 | 38,38 |

| Lean body mass<br>(Kg) 2 Yrs PD | Skeletal Muscle Mass (Kg) 2 Yrs PD | Body Water (L) 2 Yrs PD | BMI >25 (Kg/m2) 2<br>yrs PD |
|---------------------------------|------------------------------------|-------------------------|-----------------------------|
| 40,25                           | 18,40                              | 29,70                   | 0,00                        |
| 39,14                           | 16,50                              | 28,70                   | 0,00                        |
| 44,61                           | 80,20                              | 32,80                   | 0,00                        |
| 53,63                           | 27,00                              | 42,20                   | 1,00                        |
| 41,89                           | 19,70                              | 31,20                   | 0,00                        |
| 39,64                           | 17,50                              | 28,70                   | 0,00                        |
| NAN                             | NAN                                | NAN                     | NAN                         |
| 46,86                           | 21,70                              | 34,60                   | 1,00                        |
| 39,87                           | 17,90                              | 29,60                   | 1,00                        |
| 50,45                           | 23,20                              | 37,60                   | 1,00                        |
| 25,56                           | 8,60                               | 18,20                   | 0,00                        |
| 17,10                           | 22,40                              | 36,30                   | 1,00                        |
| 37,72                           | 16,70                              | 27,30                   | 0,00                        |
| 60,42                           | 29,70                              | 45,10                   | 1,00                        |
| 45,74                           | 20,70                              | 33,50                   | 0,00                        |
| 38,08                           | 15,70                              | 27,50                   | 0,00                        |
| 37,37                           | 15,40                              | 26,10                   | 0,00                        |
| 42,24                           | 18,80                              | 30,80                   | 0,00                        |
| 44,92                           | 19,40                              | 32,40                   | 0,00                        |
| 46,65                           | 22,10                              | 35,10                   | 0,00                        |
| NAN                             | NAN                                | NAN                     | 0,00                        |
| 43,76                           | 18,00                              | 32,50                   | 1,00                        |
| 46,98                           | 22,10                              | 34,80                   | 1,00                        |
| 42,27                           | 18,30                              | 31,21                   | 0,00                        |
| 47,30                           | 22,50                              | 35,50                   | 1,00                        |
| NAN                             | NAN                                | NAN                     | NAN                         |
| 44,06                           | 20,70                              | 33,10                   | 0,00                        |
| 50,96                           | 23,50                              | 37,60                   | 1,00                        |
| 33,90                           | 14,50                              | 24,90                   | 0,00                        |
| 41,58                           | 19,10                              | 30,70                   | 0,00                        |
| 41,45                           | 18,70                              | 30,60                   | 1,00                        |
| 39,37                           | 16,80                              | 47,90                   | 0,00                        |
| 40,95                           | 17,80                              | 30,40                   | 1,00                        |
| 48,82                           | 22,70                              | 36,40                   | 1,00                        |
| 40,68                           | 18,20                              | 30,10                   | 0,00                        |
| 41,77                           | 17,60                              | 30,40                   | 0,00                        |
| 39,49                           | 16,00                              | 28,50                   | 0,00                        |
| 53,95                           | 24,90                              | 40,00                   | 1,00                        |
| NAN                             | NAN                                | NAN                     | NAN                         |
| 40,98                           | 18,60                              | 30,50                   | 1,00                        |
| 17,10                           | 19,90                              | 32,00                   | 1,00                        |
| 39,64                           | 18,00                              | 29,60                   | 1,00                        |
| NAN                             | NAN                                | NAN                     | 0,00                        |
| 38,01                           | 16,70                              | 27,90                   | 0,00                        |
| 42,37                           | 19,00                              | 31,40                   | 0,00                        |
| 39,45                           | 17,20                              | 43,80                   | 1,00                        |
| NAN                             | NAN                                | NAN                     | 0,00                        |

|       |       |       |      |
|-------|-------|-------|------|
| 41,38 | 16,30 | 30,30 | 0,00 |
| 44,92 | NAN   | NAN   | 0,00 |
| 41,31 | 18,50 | 30,10 | 0,00 |
| 17,10 | 20,80 | 32,70 | 1,00 |
| 34,40 | 14,70 | 25,50 | 0,00 |
| 40,16 | 17,50 | 47,90 | 0,00 |
| 41,95 | 19,10 | 30,80 | 0,00 |
| NAN   | NAN   | NAN   | NAN  |
| 44,72 | 20,60 | 33,30 | 0,00 |
| 44,60 | 19,70 | 55,60 | 1,00 |
| 44,76 | 20,00 | 33,30 | 0,00 |
| 37,59 | 16,40 | 27,90 | 1,00 |
| 43,67 | 18,90 | 32,20 | 1,00 |
| 39,20 | 16,30 | 29,00 | 0,00 |
| 46,46 | 21,90 | 34,30 | 1,00 |
| 38,53 | 16,60 | 28,00 | 1,00 |
| 43,79 | 20,10 | 32,30 | 1,00 |
| 40,11 | 17,60 | 29,40 | 0,00 |
| 38,88 | 17,80 | 29,10 | 1,00 |
| 35,03 | 13,10 | 24,70 | 0,00 |
| 36,48 | 15,40 | 26,00 | 0,00 |
| 39,43 | 16,90 | 48,40 | 0,00 |
| 41,90 | 18,40 | 30,80 | 1,00 |
| 39,67 | 17,10 | 29,10 | 0,00 |
| 73,68 | 38,00 | 56,00 | 1,00 |
| 51,26 | 23,20 | 37,90 | 1,00 |
| 36,75 | 15,30 | 27,20 | 0,00 |
| NAN   | NAN   | NAN   | NAN  |
| 45,82 | 20,00 | 33,00 | 0,00 |
| 47,35 | 22,30 | 35,00 | 1,00 |
| NAN   | NAN   | NAN   | 0,00 |
| 40,36 | 18,70 | 30,10 | 1,00 |
| 43,70 | 19,40 | 32,10 | 0,00 |
| 47,04 | 22,20 | 35,00 | 1,00 |
| NAN   | NAN   | NAN   | NAN  |
| 37,00 | 15,80 | 26,80 | 0,00 |
| 34,98 | 13,90 | 24,70 | 0,00 |
| 39,86 | 18,80 | 29,40 | 1,00 |
| 42,79 | 19,20 | 31,70 | 1,00 |
| NAN   | NAN   | NAN   | 0,00 |
| 34,93 | 14,60 | 25,70 | 0,00 |
| 42,09 | 19,40 | 31,20 | 1,00 |
| 43,86 | 20,10 | 32,90 | 1,00 |
| 40,41 | 17,60 | 30,00 | 0,00 |
| NAN   | 20,17 | 29,00 | 0,00 |
| NAN   | NAN   | NAN   | NAN  |
| 43,50 | 18,40 | 31,80 | 0,00 |
| 38,69 | 15,80 | 28,30 | 0,00 |
| 41,69 | 18,80 | 30,40 | 1,00 |
| NAN   | NAN   | NAN   | NAN  |

|       |       |       |      |
|-------|-------|-------|------|
| 40,27 | 16,70 | 29,20 | 0,00 |
| 37,57 | 15,30 | 26,80 | 0,00 |
| 42,59 | 19,70 | 30,80 | 0,00 |
| 37,61 | 15,50 | 27,30 | 0,00 |
| 40,00 | 17,70 | 29,50 | 0,00 |
| 33,71 | 13,00 | 24,20 | 0,00 |
| 42,84 | 19,40 | 31,80 | 0,00 |
| 37,32 | 16,60 | 27,90 | 0,00 |
| 37,95 | 16,10 | 28,20 | 1,00 |
| 41,36 | 18,50 | 30,98 | 0,00 |
| 45,49 | 20,80 | 34,10 | 1,00 |
| 41,44 | 19,00 | 30,80 | 1,00 |
| 44,85 | 19,90 | 32,90 | 0,00 |
| 44,72 | 19,70 | 32,80 | 0,00 |
| 41,30 | 18,50 | 30,60 | 1,00 |
| 37,40 | 16,10 | 27,30 | 1,00 |
| 36,94 | 16,50 | 27,30 | 0,00 |
| NAN   | NAN   | NAN   | 0,00 |
| 39,01 | 17,40 | 28,90 | 0,00 |
| 48,03 | 21,70 | 35,20 | 0,00 |
| 39,25 | 17,50 | 28,70 | 0,00 |
| 50,45 | 23,00 | 37,70 | 1,00 |
| 44,42 | 20,00 | 34,00 | 1,00 |
| NAN   | NAN   | NAN   | NAN  |
| 41,76 | 18,60 | 30,80 | 1,00 |
| 33,19 | 14,40 | 24,50 | NAN  |
| 36,68 | 16,80 | 28,20 | 0,00 |
| 41,44 | 17,80 | 31,00 | 0,00 |
| 46,54 | 21,60 | 34,80 | 1,00 |
| 39,24 | 16,60 | 28,50 | 0,00 |
| 49,32 | 23,00 | 36,50 | 1,00 |
| NAN   | NAN   | NAN   | 0,00 |
| 45,01 | 19,80 | NAN   | 0,00 |
| 41,69 | 16,90 | 29,90 | 0,00 |
| 39,02 | 16,30 | 28,20 | 1,00 |
| 40,00 | 17,10 | 29,10 | 0,00 |
| 44,87 | 20,90 | 33,50 | 1,00 |
| 37,93 | 17,10 | 28,10 | 1,00 |
| 41,45 | 18,50 | 30,00 | 0,00 |
| NAN   | NAN   | NAN   | 1,00 |
| NAN   | NAN   | NAN   | NAN  |
| 50,27 | 24,10 | 37,00 | 1,00 |
| 45,89 | 20,80 | 33,90 | 1,00 |
| NAN   | NAN   | NAN   | NAN  |
| 47,10 | 21,20 | 34,20 | 1,00 |
| 37,21 | 14,80 | 26,90 | 0,00 |
| 41,50 | 17,70 | 49,40 | 0,00 |
| 36,70 | 15,70 | 27,00 | 0,00 |
| 50,17 | 23,10 | 36,60 | 0,00 |
| 46,15 | 21,60 | 35,10 | 1,00 |

|       |       |       |      |
|-------|-------|-------|------|
| 32,31 | 13,10 | 23,50 | 0,00 |
| 44,70 | 20,50 | 32,70 | 0,00 |
| 44,37 | 19,40 | 32,10 | 0,00 |
| 35,08 | 15,60 | 25,50 | 0,00 |
| 43,67 | 20,20 | 32,70 | 1,00 |
| 39,07 | 15,80 | 54,00 | 0,00 |
| 39,96 | NAN   | 29,10 | 0,00 |
| 41,10 | 18,00 | 30,40 | 0,00 |
| 43,35 | 19,70 | 31,80 | 1,00 |
| 43,10 | 19,90 | 32,40 | 0,00 |
| NAN   | NAN   | NAN   | NAN  |
| 41,28 | 18,40 | 30,60 | 0,00 |
| 38,24 | 16,30 | 27,90 | 0,00 |
| 44,25 | 19,80 | 33,00 | 1,00 |
| 40,36 | 18,60 | 29,00 | NAN  |
| 61,60 | 29,50 | 46,20 | 1,00 |
| 39,30 | 16,60 | 28,70 | 1,00 |
| 45,06 | 21,60 | 33,40 | 1,00 |
| 46,16 | 22,00 | 34,50 | 1,00 |
| 35,11 | 15,90 | 26,70 | 1,00 |
| 44,59 | 19,50 | 33,30 | 1,00 |
| 43,36 | 18,90 | 31,70 | 0,00 |
| NAN   | NAN   | NAN   | NAN  |
| 34,83 | 14,90 | 25,80 | 0,00 |
| 41,78 | 19,00 | 30,90 | 0,00 |
| 42,25 | NAN   | 31,20 | 0,00 |
| 40,20 | 16,70 | 29,20 | 0,00 |
| 39,28 | 17,10 | 18,50 | 0,00 |
| 45,80 | 20,40 | 33,80 | 1,00 |
| 41,46 | 17,10 | 29,20 | 0,00 |
| NAN   | NAN   | NAN   | NAN  |
| 38,05 | 15,80 | 27,60 | 0,00 |
| 45,66 | 21,20 | 33,60 | 0,00 |
| 36,93 | 16,30 | 27,21 | 0,00 |
| 39,50 | 16,90 | 28,80 | 1,00 |
| 42,97 | 18,90 | 31,00 | 0,00 |
| 45,82 | 21,10 | 34,10 | 1,00 |
| 44,06 | 21,50 | 32,09 | 1,00 |
| 39,98 | 17,90 | 29,60 | 0,00 |
| NAN   | NAN   | NAN   | NAN  |
| 38,50 | 15,90 | 27,70 | 0,00 |
| 52,53 | 25,20 | 39,40 | 1,00 |
| 43,50 | 17,70 | 31,90 | 0,00 |
| 34,84 | 14,70 | 25,40 | 0,00 |
| 47,87 | 22,50 | 35,70 | 1,00 |
| 38,36 | 16,50 | 27,90 | NAN  |
| 39,61 | 17,10 | 29,30 | 1,00 |
| 39,80 | 16,80 | 29,40 | 0,00 |
| 36,60 | 15,80 | 26,90 | 0,00 |
| 15,90 | 17,90 | 29,70 | 0,00 |



|       |       |       |      |
|-------|-------|-------|------|
| 41,66 | 19,50 | 31,20 | 1,00 |
| 39,44 | 16,50 | 28,70 | 0,00 |
| 37,20 | 15,60 | 27,40 | 1,00 |
| 41,41 | 18,30 | 30,50 | 1,00 |
| 37,10 | 15,90 | 27,40 | 0,00 |
| 40,00 | 18,30 | 29,70 | 1,00 |
| 47,77 | 20,20 | 34,40 | 1,00 |
| 52,60 | 24,60 | 37,40 | 1,00 |
| 37,22 | 15,00 | 27,00 | 0,00 |
| 39,35 | 17,90 | 29,00 | 0,00 |
| 37,90 | 16,30 | 27,90 | 0,00 |
| NAN   | 18,90 | 30,60 | 1,00 |
| 39,02 | 16,60 | 28,90 | 0,00 |
| NAN   | NAN   | NAN   | NAN  |
| 36,50 | 15,40 | 26,40 | 0,00 |
| NAN   | NAN   | NAN   | NAN  |
| 40,23 | 17,90 | 29,40 | 1,00 |
| 41,90 | 18,60 | 31,20 | 0,00 |
| NAN   | NAN   | NAN   | NAN  |
| 48,70 | 20,70 | 35,40 | 1,00 |
| 42,70 | 17,60 | 31,30 | 1,00 |
| 39,90 | 17,50 | 29,30 | 0,00 |
| NAN   | NAN   | NAN   | 1,00 |
| 44,40 | 19,00 | 31,60 | 0,00 |
| 46,28 | 21,50 | 34,30 | 1,00 |
| 42,96 | 18,80 | 31,40 | 1,00 |
| 36,70 | 15,30 | 27,10 | 0,00 |
| 45,70 | 22,30 | 34,30 | 1,00 |
| 47,54 | 21,60 | 35,10 | 1,00 |
| NAN   | NAN   | NAN   | NAN  |
| 38,16 | 16,70 | 28,00 | 0,00 |
| 44,13 | NAN   | 31,30 | 0,00 |
| 39,95 | 17,00 | 29,00 | 0,00 |
| NAN   | NAN   | NAN   | NAN  |
| 40,97 | 18,10 | 30,10 | 0,00 |
| 40,60 | 17,90 | 29,90 | 1,00 |
| 45,47 | 20,70 | 33,40 | 0,00 |
| 32,70 | 12,30 | 23,20 | 0,00 |
| NAN   | NAN   | NAN   | NAN  |
| 37,00 | 17,40 | 27,60 | 0,00 |
| 37,20 | 15,40 | 26,90 | 0,00 |
| 38,70 | 16,70 | 28,50 | 1,00 |
| 38,90 | 16,90 | 27,90 | 1,00 |
| 41,03 | 18,90 | 29,90 | 0,00 |
| 42,90 | 18,80 | 31,80 | 0,00 |
| NAN   | NAN   | NAN   | NAN  |
| 56,35 | 25,70 | 41,50 | NAN  |
| 42,30 | 20,00 | 31,50 | 1,00 |
| NAN   | NAN   | NAN   | NAN  |
| 45,27 | 21,60 | 33,70 | 1,00 |

|       |       |       |      |
|-------|-------|-------|------|
| 36,40 | 15,70 | 27,00 | 0,00 |
| 41,28 | 18,80 | 29,40 | 1,00 |
| 46,90 | 22,50 | 35,20 | 1,00 |
| NAN   | NAN   | NAN   | 1,00 |
| NAN   | NAN   | NAN   | NAN  |
| 46,90 | 20,00 | 34,60 | 0,00 |
| 38,20 | NAN   | 28,10 | 0,00 |
| 34,60 | 16,30 | 25,80 | 0,00 |
| 25,48 | 21,30 | 33,70 | 0,00 |
| NAN   | NAN   | NAN   | 1,00 |
| 41,30 | 19,10 | 30,90 | 1,00 |
| NAN   | NAN   | NAN   | NAN  |
| 39,60 | 17,00 | 29,70 | 0,00 |
| 37,50 | 16,80 | 27,80 | 0,00 |
| NAN   | NAN   | NAN   | NAN  |
| NAN   | NAN   | NAN   | NAN  |
| NAN   | NAN   | NAN   | NAN  |
| NAN   | NAN   | NAN   | NAN  |
| 43,10 | 19,40 | 31,90 | 0,00 |
| NAN   | NAN   | NAN   | NAN  |
| NAN   | NAN   | NAN   | NAN  |
| 44,30 | NAN   | 33,30 | 0,00 |
| 47,70 | 21,40 | 35,60 | 1,00 |
| 45,40 | 20,80 | 37,70 | 1,00 |
| 44,50 | 21,30 | 32,90 | 0,00 |
| NAN   | NAN   | NAN   | NAN  |
| NAN   | NAN   | NAN   | 1,00 |
| 36,30 | 14,90 | 26,50 | 0,00 |
| 37,40 | 15,40 | 27,80 | 0,00 |
| 38,20 | 16,90 | 28,10 | 1,00 |
| 39,90 | 18,20 | 29,90 | 0,00 |
| NAN   | NAN   | NAN   | NAN  |
| 43,80 | 19,50 | 32,60 | 1,00 |
| 43,60 | 20,10 | 32,60 | 1,00 |
| NAN   | NAN   | NAN   | NAN  |
| NAN   | NAN   | NAN   | NAN  |
| NAN   | NAN   | NAN   | NAN  |
| 46,10 | NAN   | 34,30 | 0,00 |
| 46,89 | 21,00 | 34,80 | 1,00 |
| NAN   | NAN   | NAN   | NAN  |
| NAN   | NAN   | NAN   | NAN  |
| 41,80 | 19,20 | 31,50 | 0,00 |
| NAN   | NAN   | NAN   | NAN  |
| 37,40 | 16,00 | 27,40 | 0,00 |
| NAN   | NAN   | NAN   | NAN  |
| NAN   | NAN   | NAN   | NAN  |
| 40,60 | 17,80 | 29,90 | 0,00 |
| NAN   | NAN   | NAN   | NAN  |
| 38,70 | 15,70 | 27,80 | 0,00 |
| NAN   | NAN   | NAN   | NAN  |

|       |       |       |      |
|-------|-------|-------|------|
| 44,00 | 19,10 | 32,50 | 1,00 |
| 45,40 | 21,10 | 34,40 | 0,00 |
| NAN   | NAN   | NAN   | 0,00 |
| 43,50 | 18,40 | 21,80 | 0,00 |
| NAN   | NAN   | NAN   | NAN  |
| 44,20 | 21,00 | 33,20 | 1,00 |
| 41,50 | 23,80 | 37,90 | 1,00 |
| 45,60 | 19,50 | 33,40 | 0,00 |
| NAN   | NAN   | NAN   | 1,00 |
| 50,45 | 23,10 | NAN   | 1,00 |
| NAN   | NAN   | NAN   | NAN  |
| NAN   | NAN   | NAN   | NAN  |
| NAN   | NAN   | NAN   | NAN  |
| NAN   | NAN   | NAN   | 1,00 |
| 40,79 | NAN   | NAN   | 0,00 |
| 47,60 | 22,10 | 35,20 | 1,00 |

| WC >89.5 cm 2 Yrs<br>PD | Abnormal Glucose Regulation 2<br>yrs PD | IFG 2 yrs PD | IGT 2 yrs PD |
|-------------------------|-----------------------------------------|--------------|--------------|
| 0,00                    | 0,00                                    | 0,00         | 0,00         |
| 0,00                    | 0,00                                    | 0,00         | 0,00         |
| 0,00                    | 0,00                                    | 0,00         | 0,00         |
| 1,00                    | 1,00                                    | 1,00         | 0,00         |
| 0,00                    | 1,00                                    | 1,00         | 0,00         |
| 0,00                    | 0,00                                    | 0,00         | 0,00         |
| NAN                     | 0,00                                    | 0,00         | NAN          |
| NAN                     | 0,00                                    | 0,00         | 0,00         |
| 0,00                    | 0,00                                    | 0,00         | NAN          |
| 1,00                    | 1,00                                    | 1,00         | 0,00         |
| 0,00                    | 0,00                                    | 0,00         | NAN          |
| 1,00                    | 1,00                                    | 1,00         | NAN          |
| 0,00                    | 0,00                                    | 0,00         | NAN          |
| 1,00                    | 0,00                                    | 0,00         | 0,00         |
| 0,00                    | 0,00                                    | 0,00         | NAN          |
| 0,00                    | 0,00                                    | 0,00         | NAN          |
| 0,00                    | 0,00                                    | 0,00         | NAN          |
| 0,00                    | 0,00                                    | 0,00         | 0,00         |
| 0,00                    | 0,00                                    | 0,00         | 0,00         |
| 1,00                    | 1,00                                    | 0,00         | NAN          |
| 0,00                    | 0,00                                    | 0,00         | 0,00         |
| 1,00                    | 0,00                                    | 0,00         | 0,00         |
| 1,00                    | 1,00                                    | 1,00         | NAN          |
| 0,00                    | 0,00                                    | 0,00         | NAN          |
| 1,00                    | 0,00                                    | 0,00         | NAN          |
| NAN                     | 0,00                                    | 0,00         | NAN          |
| 0,00                    | 0,00                                    | 0,00         | NAN          |
| 1,00                    | 1,00                                    | 0,00         | NAN          |
| 0,00                    | 1,00                                    | 1,00         | 0,00         |
| 0,00                    | 0,00                                    | 0,00         | 0,00         |
| 1,00                    | 1,00                                    | 1,00         | NAN          |
| NAN                     | 1,00                                    | 1,00         | 0,00         |
| 0,00                    | 0,00                                    | 0,00         | NAN          |
| 0,00                    | 0,00                                    | 0,00         | NAN          |
| 0,00                    | 0,00                                    | 0,00         | NAN          |
| 0,00                    | 0,00                                    | 0,00         | 0,00         |
| 0,00                    | 0,00                                    | 0,00         | 0,00         |
| 1,00                    | 0,00                                    | 0,00         | NAN          |
| NAN                     | 0,00                                    | 0,00         | NAN          |
| 0,00                    | 0,00                                    | 0,00         | NAN          |
| 0,00                    | 0,00                                    | 0,00         | NAN          |
| 1,00                    | 1,00                                    | 1,00         | 0,00         |
| 0,00                    | 0,00                                    | 0,00         | 0,00         |
| 0,00                    | 0,00                                    | 0,00         | 0,00         |
| 0,00                    | 0,00                                    | 0,00         | NAN          |
| 0,00                    | 0,00                                    | 0,00         | 0,00         |
| 0,00                    | 0,00                                    | 0,00         | NAN          |

|      |      |      |      |
|------|------|------|------|
| 0,00 | 0,00 | 0,00 | 0,00 |
| 0,00 | 0,00 | 0,00 | NAN  |
| 0,00 | 0,00 | 0,00 | NAN  |
| 1,00 | 0,00 | 0,00 | NAN  |
| 0,00 | 0,00 | 0,00 | NAN  |
| 0,00 | 0,00 | 0,00 | 1,00 |
| 0,00 | 0,00 | 0,00 | 0,00 |
| 0,00 | 0,00 | 0,00 | NAN  |
| 0,00 | 0,00 | 0,00 | NAN  |
| 0,00 | 0,00 | 0,00 | NAN  |
| 0,00 | 0,00 | 0,00 | 0,00 |
| 0,00 | 0,00 | 0,00 | 0,00 |
| 0,00 | 0,00 | 0,00 | 0,00 |
| 0,00 | 0,00 | 0,00 | NAN  |
| 1,00 | 0,00 | 0,00 | 0,00 |
| 0,00 | 0,00 | 0,00 | 0,00 |
| 0,00 | 1,00 | 1,00 | NAN  |
| 0,00 | 0,00 | 0,00 | 0,00 |
| 1,00 | 0,00 | 0,00 | NAN  |
| 0,00 | 0,00 | 0,00 | 0,00 |
| 0,00 | 0,00 | 0,00 | NAN  |
| 0,00 | 0,00 | 0,00 | 0,00 |
| 1,00 | 0,00 | 0,00 | NAN  |
| 0,00 | 0,00 | 0,00 | NAN  |
| 1,00 | 0,00 | 0,00 | 0,00 |
| 1,00 | 1,00 | 1,00 | NAN  |
| 0,00 | 0,00 | 0,00 | 0,00 |
| NAN  | 1,00 | 1,00 | NAN  |
| 0,00 | 0,00 | 0,00 | 0,00 |
| 0,00 | 0,00 | 0,00 | NAN  |
| 0,00 | 0,00 | 0,00 | NAN  |
| 1,00 | 0,00 | 0,00 | 1,00 |
| 1,00 | 1,00 | 1,00 | 0,00 |
| 1,00 | 0,00 | 0,00 | 0,00 |
| NAN  | 0,00 | 0,00 | 0,00 |
| 0,00 | 0,00 | 0,00 | 0,00 |
| 0,00 | 0,00 | 0,00 | 0,00 |
| 0,00 | 1,00 | 1,00 | NAN  |
| 1,00 | 0,00 | 0,00 | NAN  |
| 0,00 | 1,00 | 0,00 | 0,00 |
| 0,00 | 0,00 | 0,00 | 1,00 |
| 1,00 | 1,00 | 1,00 | 1,00 |
| 1,00 | 0,00 | 0,00 | NAN  |
| 0,00 | 1,00 | 1,00 | NAN  |
| 0,00 | 0,00 | 0,00 | NAN  |
| NAN  | 0,00 | 0,00 | 0,00 |
| 0,00 | 0,00 | 0,00 | NAN  |
| 0,00 | 0,00 | 0,00 | 0,00 |
| 0,00 | 0,00 | 0,00 | NAN  |
| NAN  | 0,00 | 0,00 | 0,00 |

|      |      |      |      |
|------|------|------|------|
| 0,00 | 0,00 | 0,00 | 0,00 |
| 0,00 | 0,00 | 0,00 | 0,00 |
| 0,00 | 0,00 | 0,00 | 0,00 |
| 0,00 | 0,00 | 0,00 | 0,00 |
| 0,00 | 0,00 | 0,00 | 0,00 |
| 0,00 | 0,00 | 0,00 | 0,00 |
| 0,00 | 0,00 | 0,00 | NAN  |
| 0,00 | 0,00 | 0,00 | NAN  |
| 1,00 | 1,00 | 1,00 | NAN  |
| 0,00 | 0,00 | 0,00 | NAN  |
| 0,00 | 0,00 | 0,00 | NAN  |
| 0,00 | 1,00 | 1,00 | NAN  |
| 0,00 | 0,00 | 0,00 | 0,00 |
| 0,00 | 0,00 | 0,00 | NAN  |
| 1,00 | 0,00 | 0,00 | 0,00 |
| 0,00 | 0,00 | 0,00 | 0,00 |
| 0,00 | 0,00 | 0,00 | NAN  |
| 0,00 | 0,00 | 0,00 | NAN  |
| 0,00 | 0,00 | 0,00 | 0,00 |
| 0,00 | 0,00 | 0,00 | 0,00 |
| 0,00 | 0,00 | 0,00 | 0,00 |
| 0,00 | 0,00 | 0,00 | NAN  |
| 0,00 | 0,00 | 0,00 | 0,00 |
| NAN  | 0,00 | 0,00 | 0,00 |
| 0,00 | 0,00 | 0,00 | 0,00 |
| 0,00 | 0,00 | 0,00 | NAN  |
| 0,00 | 0,00 | 0,00 | NAN  |
| 0,00 | 0,00 | 0,00 | NAN  |
| 1,00 | 0,00 | 0,00 | 0,00 |
| 0,00 | 0,00 | 0,00 | 0,00 |
| 1,00 | 0,00 | 0,00 | NAN  |
| 1,00 | 1,00 | 1,00 | NAN  |
| 0,00 | 0,00 | 0,00 | 0,00 |
| 0,00 | 0,00 | 0,00 | NAN  |
| 0,00 | 1,00 | 1,00 | NAN  |
| 0,00 | 0,00 | 0,00 | NAN  |
| 1,00 | 1,00 | 1,00 | NAN  |
| NAN  | 1,00 | 1,00 | 0,00 |
| 0,00 | 0,00 | 0,00 | NAN  |
| 1,00 | 0,00 | 0,00 | NAN  |
| 0,00 | 0,00 | 0,00 | 0,00 |
| 1,00 | 1,00 | 1,00 | NAN  |
| 1,00 | 0,00 | 0,00 | 0,00 |
| NAN  | 0,00 | 0,00 | 0,00 |
| 1,00 | 0,00 | 0,00 | 0,00 |
| 1,00 | 0,00 | 0,00 | NAN  |
| 0,00 | 0,00 | 0,00 | NAN  |
| 1,00 | 0,00 | 0,00 | NAN  |
| 1,00 | 0,00 | 0,00 | 0,00 |
| 1,00 | 0,00 | 0,00 | 0,00 |

[illegible]

|      |      |      |      |
|------|------|------|------|
| 1,00 | 0,00 | 0,00 | 0,00 |
| 0,00 | 0,00 | 0,00 | NAN  |
| 1,00 | 1,00 | 0,00 | 0,00 |
| 0,00 | 0,00 | 0,00 | NAN  |
| 0,00 | 0,00 | 0,00 | 0,00 |
| 0,00 | 1,00 | 1,00 | NAN  |
| 1,00 | 0,00 | 0,00 | 0,00 |
| 1,00 | 1,00 | 0,00 | 0,00 |
| 0,00 | 0,00 | 0,00 | 0,00 |
| 0,00 | 0,00 | 0,00 | NAN  |
| 0,00 | 0,00 | 0,00 | 0,00 |
| 1,00 | 0,00 | 0,00 | NAN  |
| 0,00 | 0,00 | 0,00 | NAN  |
| NAN  | 0,00 | 0,00 | 0,00 |
| 0,00 | 0,00 | 0,00 | NAN  |
| NAN  | 1,00 | 1,00 | 0,00 |
| 1,00 | 0,00 | 0,00 | 0,00 |
| 0,00 | 0,00 | 0,00 | NAN  |
| NAN  | 0,00 | 0,00 | 0,00 |
| 0,00 | 0,00 | 0,00 | 0,00 |
| 1,00 | 0,00 | 0,00 | 0,00 |
| 0,00 | 0,00 | 0,00 | NAN  |
| 1,00 | 0,00 | 0,00 | NAN  |
| NAN  | 0,00 | 0,00 | NAN  |
| 1,00 | 0,00 | 0,00 | NAN  |
| 1,00 | 0,00 | 0,00 | 0,00 |
| 0,00 | 0,00 | 0,00 | 0,00 |
| 1,00 | 0,00 | 0,00 | 0,00 |
| 0,00 | 0,00 | 0,00 | 0,00 |
| NAN  | 0,00 | 0,00 | NAN  |
| 0,00 | 0,00 | 0,00 | 0,00 |
| 0,00 | 1,00 | 0,00 | 0,00 |
| 0,00 | 0,00 | 0,00 | NAN  |
| 0,00 | 1,00 | 1,00 | 0,00 |
| 0,00 | 0,00 | 0,00 | NAN  |
| 0,00 | 0,00 | 0,00 | 0,00 |
| 0,00 | 0,00 | 0,00 | NAN  |
| 0,00 | 0,00 | 0,00 | 0,00 |
| NAN  | 0,00 | 0,00 | 0,00 |
| 0,00 | 0,00 | 0,00 | 0,00 |
| 0,00 | 1,00 | 1,00 | 0,00 |
| 0,00 | 1,00 | 1,00 | 0,00 |
| 0,00 | 0,00 | 0,00 | 0,00 |
| 0,00 | 0,00 | 0,00 | NAN  |
| 0,00 | 0,00 | 0,00 | NAN  |
| NAN  | 1,00 | 1,00 | NAN  |
| 1,00 | 0,00 | 0,00 | 0,00 |
| 1,00 | 0,00 | 0,00 | NAN  |
| NAN  | 0,00 | 0,00 | NAN  |
| 1,00 | 0,00 | 0,00 | 0,00 |



|      |      |      |      |
|------|------|------|------|
| 0,00 | 0,00 | 0,00 | NAN  |
| 0,00 | 0,00 | 0,00 | 0,00 |
| 1,00 | 1,00 | 1,00 | 1,00 |
| NAN  | 1,00 | 1,00 | 0,00 |
| NAN  | 0,00 | 0,00 | 0,00 |
| 0,00 | 0,00 | 0,00 | NAN  |
| 0,00 | 0,00 | 0,00 | 0,00 |
| 0,00 | 0,00 | 0,00 | NAN  |
| 0,00 | 0,00 | 0,00 | 0,00 |
| 0,00 | 1,00 | 1,00 | NAN  |
| NAN  | 0,00 | 0,00 | 0,00 |
| 0,00 | 0,00 | 0,00 | NAN  |
| 0,00 | 1,00 | 1,00 | 0,00 |
| NAN  | 0,00 | 0,00 | 0,00 |
| NAN  | 0,00 | 0,00 | 0,00 |
| NAN  | 0,00 | 0,00 | NAN  |
| NAN  | 0,00 | 0,00 | 0,00 |
| 0,00 | 1,00 | 0,00 | 0,00 |
| NAN  | 0,00 | 0,00 | 0,00 |
| NAN  | 0,00 | 0,00 | NAN  |
| 0,00 | 0,00 | 0,00 | NAN  |
| 0,00 | 0,00 | 0,00 | 0,00 |
| 1,00 | 0,00 | 0,00 | NAN  |
| NAN  | 0,00 | 0,00 | 0,00 |
| NAN  | 0,00 | 0,00 | NAN  |
| NAN  | 0,00 | 0,00 | 0,00 |
| 0,00 | 0,00 | 0,00 | 0,00 |
| 0,00 | 0,00 | 0,00 | NAN  |
| 1,00 | 0,00 | 0,00 | 0,00 |
| 0,00 | 0,00 | 0,00 | 0,00 |
| NAN  | 1,00 | 1,00 | 1,00 |
| 1,00 | 1,00 | 1,00 | 0,00 |
| 0,00 | 0,00 | 0,00 | 0,00 |
| NAN  | 0,00 | 0,00 | 0,00 |
| NAN  | 0,00 | 0,00 | NAN  |
| NAN  | 0,00 | 0,00 | NAN  |
| 0,00 | 0,00 | 0,00 | 0,00 |
| 1,00 | 0,00 | 0,00 | 0,00 |
| NAN  | 0,00 | 0,00 | 0,00 |
| NAN  | 0,00 | 0,00 | 0,00 |
| 0,00 | 0,00 | 0,00 | 0,00 |
| NAN  | 0,00 | 0,00 | 0,00 |
| 0,00 | 0,00 | 0,00 | 0,00 |
| NAN  | 0,00 | 0,00 | NAN  |
| NAN  | 0,00 | 0,00 | 0,00 |
| 0,00 | 1,00 | 1,00 | NAN  |
| NAN  | 0,00 | 0,00 | NAN  |
| 0,00 | 0,00 | 0,00 | 0,00 |
| NAN  | 1,00 | 1,00 | 0,00 |

|      |      |      |      |
|------|------|------|------|
| 0,00 | 0,00 | 0,00 | 0,00 |
| 0,00 | 0,00 | 0,00 | 1,00 |
| NAN  | 0,00 | 0,00 | NAN  |
| 0,00 | 0,00 | 0,00 | 0,00 |
| NAN  | 0,00 | 0,00 | 0,00 |
| 0,00 | 0,00 | 0,00 | 0,00 |
| 1,00 | 0,00 | 0,00 | 0,00 |
| 0,00 | 0,00 | 0,00 | 0,00 |
| NAN  | 0,00 | 0,00 | 0,00 |
| 0,00 | 1,00 | 1,00 | NAN  |
| NAN  | 1,00 | 1,00 | 0,00 |
| NAN  | 1,00 | 1,00 | NAN  |
| NAN  | 0,00 | 0,00 | 0,00 |
| NAN  | 1,00 | 1,00 | NAN  |
| 0,00 | 0,00 | 0,00 | 0,00 |
| 1,00 | 1,00 | 1,00 | 0,00 |

[illegible]

[illegible]

[illegible]

[illegible]

|      |      |      |      |
|------|------|------|------|
| 0,00 | 0,00 | 0,00 | 0,00 |
| 0,00 | 0,00 | 1,00 | 0,00 |
| 0,00 | 0,00 | 0,00 | 0,00 |
| 0,00 | 0,00 | 0,00 | 0,00 |
| 0,00 | 0,00 | 0,00 | 0,00 |
| 0,00 | 0,00 | 0,00 | 0,00 |
| 0,00 | 0,00 | 0,00 | 0,00 |
| 1,00 | 0,00 | 0,00 | 0,00 |
| 0,00 | 0,00 | 0,00 | 0,00 |
| 0,00 | 0,00 | 0,00 | 0,00 |
| 0,00 | NAN  | NAN  | 0,00 |
| 0,00 | 0,00 | 0,00 | 0,00 |
| 0,00 | 0,00 | 0,00 | 0,00 |
| 0,00 | NAN  | NAN  | 0,00 |
| 0,00 | 0,00 | 1,00 | 0,00 |
| 0,00 | NAN  | NAN  | 0,00 |
| 0,00 | 0,00 | 0,00 | 0,00 |
| 0,00 | NAN  | NAN  | 0,00 |
| 0,00 | NAN  | NAN  | 0,00 |
| 0,00 | 0,00 | 0,00 | 0,00 |
| 0,00 | 0,00 | 0,00 | 0,00 |
| 0,00 | 0,00 | 0,00 | 0,00 |
| 0,00 | 0,00 | 0,00 | 0,00 |
| 0,00 | 0,00 | 0,00 | 0,00 |
| NAN  | 0,00 | 0,00 | 0,00 |
| 0,00 | NAN  | NAN  | 0,00 |
| 0,00 | 0,00 | 0,00 | 0,00 |
| 0,00 | 0,00 | 0,00 | 0,00 |
| 0,00 | 0,00 | 0,00 | 0,00 |
| 0,00 | 0,00 | 1,00 | 0,00 |
| 0,00 | NAN  | NAN  | 0,00 |
| 0,00 | 0,00 | 1,00 | 0,00 |
| 0,00 | 0,00 | 0,00 | 0,00 |
| 0,00 | 0,00 | 0,00 | 0,00 |
| 0,00 | 0,00 | 0,00 | 0,00 |
| 0,00 | 0,00 | 0,00 | 0,00 |
| 0,00 | 0,00 | 0,00 | 0,00 |
| 0,00 | 0,00 | 0,00 | 0,00 |
| 0,00 | 0,00 | 0,00 | 0,00 |
| 0,00 | 0,00 | 0,00 | 0,00 |
| 0,00 | 0,00 | 1,00 | 0,00 |
| 0,00 | 0,00 | 0,00 | 0,00 |
| 0,00 | 0,00 | 0,00 | 0,00 |
| 0,00 | 0,00 | 0,00 | 0,00 |
| 0,00 | 0,00 | 0,00 | 0,00 |
| 1,00 | 0,00 | 0,00 | 0,00 |
| 0,00 | NAN  | NAN  | 0,00 |
| 0,00 | 0,00 | 0,00 | 0,00 |
| 0,00 | NAN  | NAN  | 1,00 |
| 0,00 | NAN  | NAN  | 0,00 |
| 1,00 | 0,00 | 0,00 | 0,00 |

|  |      |      |      |      |
|--|------|------|------|------|
|  | 0,00 | 0,00 | 0,00 | 0,00 |
|  | 0,00 | 0,00 | 0,00 | 0,00 |
|  | 1,00 | NAN  | NAN  | 0,00 |
|  | 0,00 | NAN  | NAN  | 0,00 |
|  | 0,00 | 0,00 | 0,00 | 0,00 |
|  | 0,00 | 0,00 | 0,00 | 0,00 |
|  | 0,00 | 0,00 | 0,00 | 0,00 |
|  | 0,00 | 0,00 | 0,00 | 0,00 |
|  | 0,00 | 0,00 | 0,00 | 0,00 |
|  | 0,00 | 0,00 | 1,00 | 0,00 |
|  | 0,00 | 0,00 | 0,00 | 0,00 |
|  | 0,00 | 0,00 | 0,00 | 0,00 |
|  | 0,00 | 0,00 | 0,00 | 0,00 |
|  | 0,00 | 0,00 | 0,00 | 0,00 |
|  | 0,00 | 0,00 | 1,00 | 0,00 |
|  | 0,00 | 0,00 | 0,00 | 1,00 |
|  | 0,00 | NAN  | NAN  | 0,00 |
|  | 1,00 | 0,00 | 0,00 | 0,00 |
|  | 0,00 | NAN  | NAN  | 0,00 |
|  | 0,00 | 0,00 | 0,00 | 0,00 |
|  | 0,00 | 0,00 | 0,00 | 0,00 |
|  | 0,00 | 0,00 | 0,00 | 0,00 |
|  | 0,00 | 0,00 | 0,00 | 0,00 |
|  | 0,00 | 0,00 | 0,00 | 0,00 |
|  | 0,00 | 0,00 | 0,00 | 0,00 |
|  | 0,00 | 0,00 | 0,00 | 0,00 |
|  | 0,00 | NAN  | NAN  | 0,00 |
|  | 0,00 | NAN  | NAN  | 0,00 |
|  | 0,00 | 0,00 | 1,00 | 0,00 |
|  | 0,00 | 0,00 | 0,00 | 0,00 |
|  | 0,00 | 0,00 | 0,00 | 0,00 |
|  | 0,00 | 0,00 | 0,00 | 0,00 |
|  | 0,00 | 0,00 | 1,00 | 0,00 |
|  | 1,00 | NAN  | NAN  | 1,00 |
|  | 0,00 | 0,00 | 0,00 | 0,00 |
|  | 0,00 | 0,00 | 0,00 | 0,00 |
|  | 0,00 | NAN  | NAN  | 0,00 |
|  | 0,00 | NAN  | NAN  | 0,00 |
|  | 0,00 | NAN  | NAN  | 0,00 |
|  | 0,00 | 0,00 | 0,00 | 0,00 |
|  | 0,00 | 0,00 | 0,00 | 0,00 |
|  | 0,00 | NAN  | NAN  | 0,00 |
|  | 0,00 | 0,00 | 0,00 | 0,00 |
|  | 1,00 | 0,00 | 0,00 | 0,00 |
|  | 0,00 | NAN  | NAN  | 0,00 |
|  | 0,00 | 0,00 | 0,00 | 0,00 |
|  | 0,00 | NAN  | NAN  | 0,00 |
|  | 0,00 | NAN  | NAN  | 0,00 |
|  | 0,00 | 0,00 | 0,00 | 0,00 |
|  | 0,00 | 0,00 | 0,00 | 0,00 |
|  | 0,00 | NAN  | NAN  | 0,00 |
|  | 0,00 | 0,00 | 0,00 | 0,00 |
|  | 1,00 | 0,00 | 0,00 | 0,00 |
|  | 0,00 | NAN  | NAN  | 0,00 |
|  | 0,00 | 0,00 | 0,00 | 0,00 |
|  | 0,00 | NAN  | NAN  | 0,00 |
|  | 0,00 | NAN  | NAN  | 0,00 |
|  | 0,00 | 0,00 | 0,00 | 0,00 |
|  | 0,00 | NAN  | NAN  | 0,00 |
|  | 0,00 | 0,00 | 0,00 | 0,00 |
|  | 0,00 | NAN  | NAN  | 0,00 |



|      |      |      |      |
|------|------|------|------|
| 0,00 | 0,00 | 0,00 | 0,00 |
| 0,00 | 0,00 | 0,00 | 1,00 |
| 0,00 | 0,00 | 1,00 | 0,00 |
| 1,00 | 0,00 | 0,00 | 0,00 |
| 1,00 | NAN  | NAN  | 0,00 |
| 0,00 | NAN  | NAN  | 0,00 |
| 0,00 | 0,00 | 1,00 | 0,00 |
| 0,00 | 0,00 | 0,00 | 0,00 |
| 0,00 | 0,00 | 0,00 | 0,00 |
| 0,00 | 1,00 | 1,00 | 1,00 |
| 1,00 | NAN  | NAN  | 1,00 |
| 0,00 | 0,00 | 0,00 | 0,00 |
| 0,00 | NAN  | NAN  | 0,00 |
| 0,00 | NAN  | NAN  | 0,00 |
| 0,00 | 0,00 | 0,00 | 0,00 |
| 0,00 | NAN  | NAN  | 0,00 |

| HDL <45 mg/dl 2 Yrs PD | Metabolic<br>Syndrome 2 yrs PD | Age (years) | Ethnicity | Pre-pregnancy self-<br>reported body<br>Weight (kg) |
|------------------------|--------------------------------|-------------|-----------|-----------------------------------------------------|
| 0,00                   | NAN                            | 39          | 1         | 53,00                                               |
| 0,00                   | NAN                            | 38          | 1         | 57,00                                               |
| 0,00                   | NAN                            | 44          | 1         | 67,00                                               |
| 1,00                   | NAN                            | 33          | 1         | 75,00                                               |
| 0,00                   | NAN                            | 31          | 1         | 58,50                                               |
| 1,00                   | NAN                            | 20          | 2         | 43,00                                               |
| 0,00                   | NAN                            | 40          | 1         | 52,00                                               |
| 0,00                   | NAN                            | 30          | 1         | 70,00                                               |
| 0,00                   | 0,00                           | 35          | 1         | 58,00                                               |
| 1,00                   | NAN                            | 31          | 2         | 78,00                                               |
| 0,00                   | 0,00                           | 39          | 2         | 39,00                                               |
| 0,00                   | 1,00                           | 35          | 1         | 80,00                                               |
| 0,00                   | NAN                            | 28          | 1         | 50,00                                               |
| 0,00                   | NAN                            | 30          | 2         | 96,00                                               |
| 0,00                   | NAN                            | 34          | 1         | 54,00                                               |
| 0,00                   | NAN                            | 33          | 1         | 51,00                                               |
| 1,00                   | NAN                            | 31          | 1         | 54,00                                               |
| 1,00                   | 0,00                           | 30          | 1         | 54,00                                               |
| 0,00                   | 0,00                           | 38          | 1         | 63,00                                               |
| NAN                    | NAN                            | 39          | 1         | 71,00                                               |
| 0,00                   | NAN                            | 24          | 1         | 46,10                                               |
| 1,00                   | NAN                            | 39          | 2         | 56,00                                               |
| 0,00                   | NAN                            | 37          | 2         | 72,00                                               |
| 0,00                   | 0,00                           | 37          | 1         | 59,00                                               |
| 1,00                   | 1,00                           | 40          | 1         | 74,00                                               |
| 0,00                   | NAN                            | 29          | 3         | 58,00                                               |
| 0,00                   | 0,00                           | 31          | 1         | 55,00                                               |
| 0,00                   | NAN                            | 28          | 1         | 70,00                                               |
| 0,00                   | 0,00                           | 35          | 1         | 47,00                                               |
| 0,00                   | NAN                            | 35          | 1         | 59,00                                               |
| 0,00                   | 1,00                           | 31          | 1         | 71,00                                               |
| 0,00                   | NAN                            | 31          | 1         | 58,00                                               |
| 0,00                   | 0,00                           | 33          | 2         | 52,00                                               |
| 1,00                   | 0,00                           | 32          | 1         | 76,00                                               |
| 0,00                   | NAN                            | 38          | 1         | 55,00                                               |
| 0,00                   | 0,00                           | 27          | 2         | 57,00                                               |
| 0,00                   | NAN                            | 35          | 1         | 48,00                                               |
| 1,00                   | 1,00                           | 28          | 2         | 80,00                                               |
| 1,00                   | NAN                            | 37          | 2         | 64,00                                               |
| 0,00                   | NAN                            | 33          | 1         | 74,00                                               |
| 1,00                   | NAN                            | 30          | 1         | 70,00                                               |
| 0,00                   | 1,00                           | 36          | 2         | 60,00                                               |
| 0,00                   | NAN                            | 30          | 2         | 63,00                                               |
| 0,00                   | 0,00                           | 34          | 1         | 43,00                                               |
| 0,00                   | NAN                            | 36          | 1         | 61,50                                               |
| 0,00                   | 0,00                           | 39          | 1         | 62,00                                               |
| 0,00                   | 0,00                           | 25          | 1         | 42,00                                               |

|      |      |    |   |        |
|------|------|----|---|--------|
| 0,00 | NAN  | 30 | 2 | 56,00  |
| 0,00 | 0,00 | 39 | 1 | 66,00  |
| 1,00 | 0,00 | 25 | 2 | 56,50  |
| 0,00 | NAN  | 30 | 1 | 69,50  |
| 0,00 | NAN  | 37 | 1 | 48,00  |
| 0,00 | 0,00 | 34 | 2 | 60,00  |
| 1,00 | 0,00 | 41 | 2 | 61,00  |
| 0,00 | NAN  | 42 | 1 | 53,50  |
| 0,00 | NAN  | 29 | 1 | 69,00  |
| 0,00 | NAN  | 26 | 1 | 60,00  |
| 0,00 | 0,00 | 34 | 2 | 69,50  |
| 0,00 | NAN  | 35 | 1 | 53,50  |
| 0,00 | NAN  | 32 | 2 | 75,00  |
| 0,00 | NAN  | 34 | 1 | 51,00  |
| 1,00 | 1,00 | 30 | 2 | 62,00  |
| 0,00 | NAN  | 34 | 2 | 64,00  |
| 0,00 | NAN  | 32 | 1 | 69,00  |
| 0,00 | NAN  | 38 | 1 | 56,00  |
| 1,00 | 1,00 | 33 | 1 | 59,00  |
| 0,00 | 0,00 | 24 | 2 | 48,00  |
| 1,00 | NAN  | 37 | 2 | 55,00  |
| 0,00 | NAN  | 37 | 1 | 55,00  |
| 1,00 | NAN  | 43 | 2 | 60,00  |
| 0,00 | NAN  | 31 | 1 | 50,50  |
| 0,00 | NAN  | 24 | 2 | 117,00 |
| 0,00 | NAN  | 27 | 2 | 70,00  |
| 0,00 | NAN  | 35 | 1 | 53,50  |
| 0,00 | NAN  | 35 | 1 | 78,00  |
| 0,00 | NAN  | 26 | 1 | 58,00  |
| 0,00 | NAN  | 28 | 2 | 63,00  |
| 0,00 | NAN  | 38 | 1 | 60,00  |
| 0,00 | 0,00 | 41 | 2 | 62,00  |
| 0,00 | 0,00 | 38 | 1 | 64,00  |
| 0,00 | NAN  | 36 | 1 | 70,00  |
| 0,00 | NAN  | 30 | 2 | 55,00  |
| 0,00 | NAN  | 34 | 1 | 48,50  |
| 0,00 | 0,00 | 30 | 2 | 53,00  |
| 0,00 | NAN  | 33 | 2 | 50,00  |
| 0,00 | 0,00 | 40 | 2 | 68,00  |
| 0,00 | NAN  | 30 | 3 | 49,50  |
| 0,00 | NAN  | 33 | 1 | 50,00  |
| 0,00 | 1,00 | 37 | 2 | 63,00  |
| 0,00 | NAN  | 39 | 3 | 74,00  |
| 0,00 | NAN  | 39 | 1 | 52,50  |
| 0,00 | NAN  | 31 | 1 | 54,00  |
| 0,00 | NAN  | 38 | 1 | 61,00  |
| 0,00 | 0,00 | 33 | 1 | 60,00  |
| 0,00 | NAN  | 42 | 2 | 55,50  |
| 0,00 | NAN  | 35 | 1 | 60,50  |
| 0,00 | NAN  | 28 | 3 | 46,00  |

|      |      |    |   |       |
|------|------|----|---|-------|
| 0,00 | 0,00 | 34 | 1 | 52,00 |
| 0,00 | NAN  | 21 | 2 | 43,00 |
| 0,00 | NAN  | 25 | 3 | 58,00 |
| 1,00 | 0,00 | 26 | 2 | 49,00 |
| 0,00 | 0,00 | 33 | 2 | 60,00 |
| 0,00 | 0,00 | 22 | 2 | 50,00 |
| 0,00 | NAN  | 30 | 1 | 63,00 |
| 0,00 | NAN  | 40 | 1 | 55,00 |
| 0,00 | NAN  | 30 | 2 | 50,00 |
| 0,00 | NAN  | 36 | 1 | 63,50 |
| 0,00 | NAN  | 26 | 2 | 56,00 |
| 0,00 | NAN  | 36 | 3 | 67,00 |
| 0,00 | NAN  | 35 | 1 | 55,00 |
| 0,00 | 0,00 | 38 | 1 | 57,00 |
| 0,00 | 0,00 | 35 | 1 | 65,00 |
| 0,00 | NAN  | 35 | 2 | 62,00 |
| 0,00 | 0,00 | 35 | 1 | 50,00 |
| 0,00 | NAN  | 37 | 1 | 45,00 |
| 0,00 | NAN  | 35 | 1 | 51,00 |
| 0,00 | NAN  | 35 | 1 | 55,00 |
| 0,00 | NAN  | 40 | 1 | 52,00 |
| 0,00 | 0,00 | 39 | 1 | 77,00 |
| 0,00 | NAN  | 36 | 1 | 58,00 |
| 0,00 | NAN  | 26 | 2 | 56,00 |
| 1,00 | 1,00 | 38 | 2 | 68,00 |
| NAN  | NAN  | 37 | 1 | 44,50 |
| 0,00 | 0,00 | 36 | 1 | 49,00 |
| 0,00 | NAN  | 41 | 2 | 58,00 |
| 1,00 | 1,00 | 34 | 2 | 65,00 |
| 0,00 | 0,00 | 32 | 1 | 53,00 |
| 0,00 | 0,00 | 43 | 1 | 85,00 |
| 0,00 | NAN  | 40 | 2 | 60,00 |
| 0,00 | 0,00 | 40 | 1 | 56,00 |
| 0,00 | NAN  | 39 | 1 | 55,00 |
| 0,00 | NAN  | 34 | 2 | 58,00 |
| 0,00 | NAN  | 36 | 1 | 54,00 |
| 0,00 | 1,00 | 37 | 2 | 76,00 |
| 0,00 | NAN  | 31 | 2 | 57,00 |
| 0,00 | NAN  | 35 | 1 | 60,00 |
| 0,00 | NAN  | 32 | 1 | 85,00 |
| 0,00 | NAN  | 36 | 1 | 67,00 |
| 0,00 | 1,00 | 25 | 1 | 73,00 |
| 0,00 | 0,00 | 35 | 1 | 67,00 |
| 0,00 | NAN  | 32 | 1 | 54,00 |
| 0,00 | NAN  | 36 | 1 | 80,00 |
| 0,00 | 0,00 | 41 | 1 | 58,00 |
| 0,00 | NAN  | 36 | 1 | 60,00 |
| 0,00 | 0,00 | 34 | 2 | 55,00 |
| 0,00 | 0,00 | 31 | 1 | 67,00 |
| 0,00 | 0,00 | 32 | 1 | 75,00 |

|      |      |    |   |       |
|------|------|----|---|-------|
| 0,00 | NAN  | 38 | 3 | 46,00 |
| 0,00 | 0,00 | 32 | 1 | 62,00 |
| 0,00 | 0,00 | 37 | 1 | 58,00 |
| 0,00 | 0,00 | 36 | 1 | 50,00 |
| 0,00 | 0,00 | 44 | 1 | 63,50 |
| 0,00 | 0,00 | 31 | 1 | 60,00 |
| 0,00 | 0,00 | 37 | 1 | 54,00 |
| 0,00 | NAN  | 33 | 1 | 55,00 |
| 0,00 | NAN  | 25 | 2 | 60,00 |
| 0,00 | 0,00 | 36 | 1 | 60,00 |
| 1,00 | NAN  | 36 | 2 | 72,00 |
| 0,00 | 0,00 | 34 | 1 | 56,00 |
| 0,00 | 0,00 | 28 | 1 | 53,00 |
| 0,00 | 1,00 | 30 | 1 | 54,00 |
| 0,00 | 0,00 | 23 | 1 | 49,50 |
| 0,00 | NAN  | 42 | 1 | 95,00 |
| 0,00 | 0,00 | 37 | 2 | 62,60 |
| 0,00 | NAN  | 36 | 1 | 62,00 |
| 0,00 | 0,00 | 40 | 2 | 70,00 |
| 0,00 | NAN  | 40 | 1 | 61,00 |
| 0,00 | 0,00 | 31 | 2 | 66,00 |
| 0,00 | NAN  | 39 | 2 | 60,00 |
| 0,00 | NAN  | 21 | 2 | 57,00 |
| 0,00 | NAN  | 41 | 1 | 49,00 |
| 0,00 | NAN  | 35 | 2 | 67,00 |
| 0,00 | NAN  | 35 | 1 | 57,00 |
| 1,00 | NAN  | 37 | 1 | 55,00 |
| 0,00 | 0,00 | 28 | 1 | 50,00 |
| 0,00 | 1,00 | 33 | 2 | 71,00 |
| 0,00 | NAN  | 35 | 2 | 58,40 |
| 0,00 | NAN  | 35 | 2 | 47,00 |
| 0,00 | 0,00 | 33 | 2 | 49,50 |
| 0,00 | NAN  | 34 | 1 | 62,50 |
| 0,00 | 0,00 | 33 | 1 | 52,00 |
| 0,00 | NAN  | 39 | 1 | 63,50 |
| 0,00 | 0,00 | 27 | 1 | 59,00 |
| 0,00 | 0,00 | 35 | 1 | 58,00 |
| 1,00 | NAN  | 34 | 3 | 75,00 |
| 1,00 | NAN  | 30 | 1 | 65,00 |
| 0,00 | NAN  | 31 | 1 | 57,00 |
| 0,00 | NAN  | 39 | 1 | 51,50 |
| 0,00 | 0,00 | 38 | 1 | 75,00 |
| 0,00 | NAN  | 43 | 1 | 55,00 |
| 0,00 | 0,00 | 38 | 1 | 58,00 |
| 0,00 | 0,00 | 34 | 1 | 71,00 |
| 0,00 | 0,00 | 26 | 2 | 54,00 |
| 0,00 | NAN  | 34 | 2 | 63,00 |
| 0,00 | 0,00 | 36 | 1 | 53,00 |
| 0,00 | NAN  | 35 | 1 | 49,50 |
| 0,00 | NAN  | 35 | 1 | 56,00 |

|      |      |    |   |       |
|------|------|----|---|-------|
| 0,00 | 0,00 | 42 | 1 | 79,00 |
| 0,00 | 0,00 | 36 | 1 | 58,00 |
| 0,00 | NAN  | 39 | 2 | 54,50 |
| 0,00 | 0,00 | 26 | 2 | 65,00 |
| 0,00 | NAN  | 43 | 2 | 50,50 |
| 0,00 | NAN  | 32 | 2 | 60,00 |
| 1,00 | 1,00 | 33 | 1 | 83,00 |
| 0,00 | 1,00 | 32 | 2 | 81,00 |
| 0,00 | 0,00 | 37 | 1 | 59,50 |
| 0,00 | 0,00 | 37 | 1 | 54,00 |
| 0,00 | NAN  | 38 | 1 | 57,00 |
| 0,00 | NAN  | 27 | 1 | 56,50 |
| 0,00 | NAN  | 40 | 1 | 56,00 |
| 0,00 | NAN  | 29 | 2 | 79,50 |
| 0,00 | NAN  | 33 | 1 | 48,50 |
| 0,00 | NAN  | 29 | 1 | 65,00 |
| 0,00 | NAN  | 28 | 2 | 56,00 |
| 0,00 | NAN  | 20 | 1 | 54,50 |
| 0,00 | NAN  | 41 | 1 | 55,50 |
| 0,00 | NAN  | 37 | 2 | 83,00 |
| 0,00 | 0,00 | 38 | 2 | 70,00 |
| 0,00 | NAN  | 38 | 1 | 48,00 |
| 0,00 | 0,00 | 38 | 1 | 65,50 |
| 0,00 | NAN  | 35 | 1 | 54,50 |
| 1,00 | NAN  | 32 | 1 | 64,00 |
| 1,00 | 1,00 | 33 | 2 | 62,00 |
| 0,00 | NAN  | 42 | 1 | 54,70 |
| 1,00 | NAN  | 29 | 1 | 81,50 |
| 0,00 | 0,00 | 33 | 1 | 75,00 |
| 0,00 | NAN  | 30 | 1 | 52,00 |
| 0,00 | NAN  | 33 | 1 | 51,00 |
| 0,00 | 0,00 | 35 | 1 | 57,00 |
| 0,00 | 0,00 | 37 | 1 | 62,50 |
| 0,00 | 0,00 | 29 | 2 | 58,00 |
| 0,00 | NAN  | 35 | 1 | 59,00 |
| 0,00 | NAN  | 29 | 2 | 63,50 |
| 0,00 | NAN  | 32 | 1 | 59,50 |
| 0,00 | 0,00 | 31 | 2 | 47,00 |
| 0,00 | NAN  | 29 | 2 | 64,00 |
| 0,00 | 0,00 | 27 | 2 | 45,00 |
| 0,00 | 0,00 | 34 | 1 | 53,50 |
| 0,00 | 0,00 | 39 | 2 | 55,50 |
| 0,00 | 0,00 | 31 | 2 | 58,00 |
| 0,00 | 0,00 | 32 | 2 | 57,00 |
| 0,00 | NAN  | 37 | 1 | 62,50 |
| 0,00 | NAN  | 33 | 1 | 57,00 |
| 0,00 | 0,00 | 27 | 2 | 84,00 |
| 1,00 | NAN  | 40 | 1 | 59,20 |
| 0,00 | NAN  | 39 | 1 | 57,00 |
| 0,00 | 0,00 | 31 | 1 | 66,00 |

|      |      |    |   |       |
|------|------|----|---|-------|
| 0,00 | NAN  | 39 | 2 | 54,00 |
| 0,00 | NAN  | 38 | 2 | 52,50 |
| 0,00 | NAN  | 37 | 1 | 75,80 |
| 0,00 | NAN  | 37 | 1 | 72,00 |
| 0,00 | NAN  | 29 | 1 | 57,00 |
| 0,00 | 0,00 | 41 | 1 | 60,50 |
| 0,00 | 0,00 | 35 | 1 | 57,00 |
| 1,00 | NAN  | 40 | 3 | 44,00 |
| 0,00 | 0,00 | 26 | 1 | 58,00 |
| 0,00 | NAN  | 36 | 2 | 67,00 |
| 0,00 | 0,00 | 37 | 1 | 66,00 |
| 0,00 | NAN  | 39 | 2 | 59,00 |
| 0,00 | 0,00 | 39 | 1 | 53,00 |
| 0,00 | 0,00 | 43 | 1 | 48,50 |
| 0,00 | NAN  | 37 | 2 | 51,50 |
| 0,00 | NAN  | 27 | 2 | 67,00 |
| 0,00 | NAN  | 30 | 2 | 51,00 |
| 0,00 | NAN  | 40 | 2 | 57,00 |
| 0,00 | NAN  | 40 | 1 | 60,00 |
| 0,00 | NAN  | 34 | 2 | 60,00 |
| 0,00 | NAN  | 37 | 1 | 55,00 |
| 0,00 | NAN  | 29 | 1 | 57,00 |
| 0,00 | 0,00 | 37 | 1 | 87,00 |
| 0,00 | 0,00 | 32 | 2 | 83,00 |
| 0,00 | NAN  | 39 | 1 | 62,50 |
| 0,00 | NAN  | 33 | 1 | 60,00 |
| 0,00 | NAN  | 28 | 2 | 76,00 |
| 0,00 | NAN  | 31 | 2 | 45,00 |
| 0,00 | NAN  | 41 | 1 | 55,00 |
| 0,00 | 0,00 | 34 | 2 | 60,00 |
| 0,00 | NAN  | 37 | 1 | 53,00 |
| 0,00 | NAN  | 33 | 1 | 73,50 |
| 0,00 | 1,00 | 31 | 2 | 61,00 |
| 0,00 | 0,00 | 33 | 1 | 69,50 |
| 0,00 | NAN  | 36 | 1 | 60,00 |
| 0,00 | NAN  | 35 | 1 | 62,00 |
| 0,00 | NAN  | 34 | 1 | 51,00 |
| 0,00 | 0,00 | 35 | 1 | 61,00 |
| 0,00 | 0,00 | 37 | 1 | 77,00 |
| 0,00 | NAN  | 39 | 1 | 70,00 |
| 0,00 | NAN  | 37 | 2 | 68,00 |
| 0,00 | 0,00 | 34 | 1 | 67,00 |
| 0,00 | NAN  | 35 | 1 | 66,00 |
| 0,00 | NAN  | 34 | 1 | 58,00 |
| 0,00 | NAN  | 36 | 2 | 57,50 |
| 0,00 | NAN  | 40 | 1 | 53,00 |
| 0,00 | NAN  | 36 | 1 | 51,00 |
| 0,00 | NAN  | 36 | 1 | 70,00 |
| 0,00 | NAN  | 34 | 1 | 53,00 |
| 0,00 | NAN  | 23 | 2 | 81,00 |

|      |      |    |   |       |
|------|------|----|---|-------|
| 0,00 | 0,00 | 30 | 2 | 66,00 |
| 0,00 | 0,00 | 43 | 1 | 69,00 |
| 0,00 | NAN  | 30 | 1 | 70,00 |
| 0,00 | NAN  | 38 | 1 | 58,00 |
| 0,00 | NAN  | 35 | 2 | 65,00 |
| 0,00 | NAN  | 35 | 1 | 64,00 |
| 0,00 | NAN  | 33 | 2 | 89,30 |
| 0,00 | NAN  | 36 | 1 | 64,00 |
| 0,00 | NAN  | 39 | 1 | 65,00 |
| 1,00 | NAN  | 30 | 1 | 72,00 |
| 1,00 | NAN  | 35 | 2 | 63,00 |
| 0,00 | NAN  | 35 | 2 | 75,00 |
| 0,00 | NAN  | 22 | 2 | 51,00 |
| 0,00 | NAN  | 33 | 1 | 95,00 |
| 0,00 | 0,00 | 31 | 1 | 52,00 |
| 1,00 | NAN  | 39 | 2 | 84,00 |



| Pregnancy Body Weight at entry, 8-12 GW (kg) | Weight gain at 8-12 GW | Pre-pregnancy BMI (kg/m2) | HOMA-IR 12 gw | Fasting Plasma Insulin (µU/mL) | TSH mcUI/mL 12 gw |
|----------------------------------------------|------------------------|---------------------------|---------------|--------------------------------|-------------------|
| 56,00                                        | 3,00                   | 18,78                     | 0,6           | 1,2                            | 4,88              |
| 56,00                                        | -1,00                  | 21,19                     | 1,5           | 2,9                            | 2,25              |
| 71,00                                        | 4,00                   | 23,18                     | 1,2           | 2,4                            | 1,63              |
| 77,00                                        | 2,00                   | 26,26                     | 1,9           | 3,5                            | NAN               |
| 58,50                                        | 0,00                   | 21,49                     | 6,0           | 12,7                           | 1,43              |
| 46,00                                        | 3,00                   | 15,79                     | 22,7          | 42,8                           | 3,10              |
| 50,00                                        | -2,00                  | 21,93                     | 0,7           | 1,2                            | 1,62              |
| 73,00                                        | 3,00                   | 25,71                     | 1,5           | 2,8                            | 4,39              |
| 63,50                                        | 5,50                   | 23,53                     | 3,6           | 6,6                            | 1,51              |
| 83,00                                        | 5,00                   | 32,05                     | 5,1           | 9,6                            | 0,96              |
| 39,50                                        | 0,50                   | 16,88                     | 1,4           | 2,8                            | 1,43              |
| 86,00                                        | 6,00                   | 27,04                     | 3,9           | 8,2                            | NAN               |
| 51,00                                        | 1,00                   | 20,28                     | 0,7           | 1,2                            | 1,04              |
| 97,00                                        | 1,00                   | 31,35                     | 6,2           | 11,6                           | NAN               |
| 56,00                                        | 2,00                   | 18,25                     | 1,5           | 3,1                            | 2,06              |
| 53,00                                        | 2,00                   | 20,69                     | 0,9           | 1,6                            | 0,57              |
| 52,00                                        | -2,00                  | 19,83                     | 2,6           | 5,1                            | 0,44              |
| 55,00                                        | 1,00                   | 20,32                     | 2,7           | 5,2                            | 1,02              |
| 62,50                                        | -0,50                  | 22,32                     | 0,7           | 1,4                            | 0,14              |
| 73,00                                        | 2,00                   | 26,72                     | 2,3           | 4,3                            | 2,55              |
| 48,70                                        | 2,60                   | 17,35                     | 1,0           | 2,4                            | 0,90              |
| 65,00                                        | 9,00                   | 24,89                     | 1,7           | 3,2                            | 0,15              |
| 71,00                                        | -1,00                  | 27,78                     | 1,7           | 3,2                            | 1,08              |
| 62,00                                        | 3,00                   | 20,42                     | 0,8           | 1,6                            | 0,68              |
| 78,00                                        | 4,00                   | 28,55                     | 1,8           | 3,4                            | 2,00              |
| 58,00                                        | 0,00                   | 21,56                     | 0,6           | 1,2                            | 3,02              |
| 62,00                                        | 7,00                   | 19,03                     | 0,7           | 1,4                            | 3,48              |
| 74,00                                        | 4,00                   | 22,86                     | 2,0           | 4,4                            | NAN               |
| 50,00                                        | 3,00                   | 18,36                     | 1,8           | 3,4                            | 1,46              |
| 61,00                                        | 2,00                   | 20,42                     | 1,9           | 4,4                            | NAN               |
| 69,30                                        | -1,70                  | 28,80                     | 2,0           | 3,4                            | 0,95              |
| 58,00                                        | 0,00                   | 20,31                     | 1,3           | 2,4                            | 1,41              |
| 57,00                                        | 5,00                   | 21,10                     | 0,6           | 1,4                            | 0,31              |
| 78,00                                        | 2,00                   | 26,30                     | 1,2           | 2,4                            | 2,89              |
| 58,00                                        | 3,00                   | 20,20                     | 3,7           | 6,8                            | 0,09              |
| 58,80                                        | 1,80                   | 22,55                     | 2,4           | 4,8                            | 1,90              |
| 49,00                                        | 1,00                   | 18,75                     | 0,6           | 1,2                            | 1,18              |
| 85,00                                        | 5,00                   | 27,68                     | 2,9           | 6,3                            | 3,15              |
| 69,00                                        | 5,00                   | 25,64                     | 2,0           | 4,2                            | 0,43              |
| 67,00                                        | -7,00                  | 27,18                     | 10,8          | 26,0                           | NAN               |
| 71,00                                        | 1,00                   | 28,04                     | 2,1           | 4,8                            | NAN               |
| 62,00                                        | 2,00                   | 25,97                     | 1,8           | 3,2                            | 1,57              |
| 65,00                                        | 2,00                   | 21,80                     | 1,7           | 3,2                            | 4,85              |
| 55,00                                        | 12,00                  | 16,80                     | 3,4           | 7,3                            | 1,28              |
| 68,00                                        | 6,50                   | 20,55                     | 1,0           | 1,8                            | 1,80              |
| 63,00                                        | 1,00                   | 24,22                     | 4,3           | 8,7                            | 0,83              |
| 42,00                                        | 0,00                   | 17,48                     | 2,5           | 4,8                            | 2,95              |

|        |       |       |      |      |      |
|--------|-------|-------|------|------|------|
| 63,00  | 7,00  | 22,72 | 0,7  | 1,4  | 3,38 |
| 66,70  | 0,70  | 24,24 | 6,0  | 12,9 | 3,34 |
| 58,00  | 1,50  | 22,07 | 2,5  | 4,6  | 0,75 |
| 72,00  | 2,50  | 26,16 | 2,4  | 5,2  | 0,04 |
| 50,20  | 2,20  | 19,23 | 1,5  | 3,0  | 0,16 |
| 63,00  | 3,00  | 23,44 | 1,0  | 2,0  | NAN  |
| 61,00  | 0,00  | 22,41 | 5,5  | 11,0 | 0,04 |
| 54,00  | 0,50  | 20,39 | 1,1  | 2,4  | NAN  |
| 70,20  | 1,20  | 23,88 | 2,1  | 4,1  | 1,92 |
| 62,50  | 2,50  | 24,65 | 7,2  | 17,0 | 1,36 |
| 72,00  | 2,50  | 25,53 | 12,5 | 24,8 | 2,62 |
| 55,00  | 1,50  | 23,78 | 8,3  | 16,8 | 0,58 |
| 75,00  | 0,00  | 28,23 | 1,4  | 2,8  | 3,11 |
| 54,00  | 3,00  | 20,43 | 3,4  | 6,8  | 3,46 |
| 64,00  | 2,00  | 23,34 | 21,6 | 42,1 | 1,00 |
| 64,00  | 0,00  | 25,96 | 15,0 | 31,1 | 2,69 |
| 69,00  | 0,00  | 25,34 | 1,0  | 2,0  | 1,80 |
| 57,00  | 1,00  | 18,71 | 7,5  | 15,7 | 0,94 |
| 63,00  | 4,00  | 24,56 | 7,2  | 16,8 | 0,84 |
| 49,00  | 1,00  | 20,50 | 1,6  | 3,0  | 1,15 |
| 52,00  | -3,00 | 20,45 | 3,5  | 7,8  | NAN  |
| 56,00  | 1,00  | 20,20 | 1,1  | 2,1  | 2,16 |
| 62,50  | 2,50  | 23,44 | 1,3  | 2,7  | 1,98 |
| 53,10  | 2,60  | 21,02 | 0,6  | 1,2  | 0,66 |
| 135,90 | 18,90 | 38,64 | 14,5 | 27,4 | NAN  |
| 73,60  | 3,60  | 24,22 | 0,6  | 1,4  | 4,74 |
| 57,00  | 3,50  | 21,70 | 7,8  | 14,4 | 1,36 |
| 80,00  | 2,00  | 29,00 | 3,4  | 6,3  | 3,79 |
| 59,50  | 1,50  | 20,55 | 1,4  | 3,3  | 1,04 |
| 63,00  | 0,00  | 23,71 | 0,8  | 1,6  | 0,49 |
| 61,00  | 1,00  | 21,77 | 1,1  | 2,4  | 3,47 |
| 62,00  | 0,00  | 24,84 | 0,6  | 1,2  | 2,41 |
| 65,00  | 1,00  | 22,95 | 1,1  | 2,4  | NAN  |
| 74,00  | 4,00  | 24,22 | 0,8  | 1,8  | 1,27 |
| 58,00  | 3,00  | 24,12 | 0,5  | 1,2  | 3,11 |
| 51,00  | 2,50  | 18,48 | 6,4  | 13,7 | 1,87 |
| 52,80  | -0,20 | 22,64 | 2,9  | 7,1  | 2,21 |
| 54,70  | 4,70  | 21,36 | 1,9  | 4,0  | NAN  |
| 72,00  | 4,00  | 29,43 | 3,5  | 7,6  | 3,04 |
| 48,00  | -1,50 | 19,58 | 0,5  | 1,2  | NAN  |
| 54,50  | 4,50  | 19,53 | 8,3  | 15,4 | NAN  |
| 63,00  | 0,00  | 24,92 | 2,1  | 4,0  | 2,34 |
| 79,10  | 5,10  | 31,20 | 2,7  | 6,3  | NAN  |
| 55,60  | 3,10  | 20,51 | 0,6  | 1,2  | 1,71 |
| 56,60  | 2,60  | 21,63 | 1,2  | 2,2  | 3,45 |
| 64,60  | 3,60  | 21,11 | 7,7  | 14,6 | 0,47 |
| 64,20  | 4,20  | 20,52 | 0,5  | 1,2  | 1,32 |
| 55,50  | 0,00  | 20,39 | 1,1  | 2,1  | NAN  |
| 64,00  | 3,50  | 23,05 | 6,4  | 12,8 | 1,25 |
| 41,70  | -4,30 | 19,91 | 1,4  | 3,0  | 1,12 |

|       |       |       |      |      |      |
|-------|-------|-------|------|------|------|
| 53,30 | 1,30  | 19,10 | 0,7  | 1,4  | 1,26 |
| 46,00 | 3,00  | 14,37 | 1,3  | 2,8  | 3,32 |
| 59,70 | 1,70  | 21,30 | 6,1  | 11,7 | NAN  |
| 48,50 | -0,50 | 19,14 | 2,1  | 3,7  | 1,56 |
| 61,50 | 1,50  | 23,44 | 6,8  | 13,0 | 4,54 |
| 50,80 | 0,80  | 22,22 | 0,7  | 1,3  | NAN  |
| 65,10 | 2,10  | 23,14 | 3,9  | 7,9  | 2,20 |
| 58,10 | 3,10  | 21,76 | 7,3  | 14,6 | 1,90 |
| 57,40 | 7,40  | NAN   | 11,6 | 21,3 | 1,93 |
| 65,60 | 2,10  | 24,80 | 3,8  | 7,0  | 2,68 |
| 60,00 | 4,00  | 21,88 | 1,1  | 2,3  | 1,31 |
| 59,60 | -7,40 | 26,17 | 1,5  | 3,1  | NAN  |
| 58,50 | 3,50  | 20,70 | 0,6  | 1,2  | 1,28 |
| 60,00 | 3,00  | 20,94 | 1,1  | 2,0  | 0,15 |
| 66,00 | 1,00  | 27,06 | 2,3  | 4,3  | 1,03 |
| 65,10 | 3,10  | 22,77 | 1,4  | 2,5  | 1,37 |
| 51,50 | 1,50  | 18,82 | 1,7  | 3,5  | 1,21 |
| 46,50 | 1,50  | 19,22 | 2,7  | 5,3  | 0,97 |
| 54,60 | 3,60  | 19,92 | 0,7  | 1,7  | 2,04 |
| 60,00 | 5,00  | 20,20 | 0,8  | 1,8  | 2,22 |
| 55,50 | 3,50  | 19,57 | 4,8  | 10,6 | 1,09 |
| 92,30 | 15,30 | 26,03 | 4,7  | 8,9  | 1,89 |
| 65,30 | 7,30  | 21,30 | 18,9 | 34,1 | 1,83 |
| 57,50 | 1,50  | 23,01 | 1,1  | 1,9  | 2,80 |
| 67,90 | -0,10 | 26,90 | 2,3  | 4,1  | 1,31 |
| 47,50 | 3,00  | 17,83 | 1,1  | 2,4  | 1,15 |
| 53,60 | 4,60  | 17,36 | 12,2 | 27,2 | 2,85 |
| 63,10 | 5,10  | 21,30 | 0,9  | 1,9  | NAN  |
| 65,60 | 0,60  | 29,28 | 3,5  | 7,8  | 0,79 |
| 53,90 | 0,90  | 19,95 | 2,7  | 5,2  | 2,28 |
| 85,10 | 0,10  | 28,73 | 4,7  | 9,0  | 3,03 |
| 60,80 | 0,80  | 27,39 | NAN  | NAN  | 2,77 |
| 59,00 | 3,00  | 18,93 | 0,6  | 1,2  | NAN  |
| 55,00 | 0,00  | 22,03 | 1,4  | 3,0  | 3,56 |
| 59,10 | 1,10  | 24,78 | 17,2 | 34,0 | 1,92 |
| 55,60 | 1,60  | 19,83 | 6,2  | 11,8 | 1,66 |
| 75,40 | -0,60 | 30,06 | 1,2  | 2,6  | 0,17 |
| 56,20 | -0,80 | 25,00 | 1,3  | 2,4  | 1,97 |
| 65,80 | 5,80  | 21,26 | 1,3  | 2,5  | 1,06 |
| NAN   | NAN   | 24,57 | 1,5  | 3,1  | 2,41 |
| 71,10 | 4,10  | 22,91 | 0,7  | 1,4  | 2,33 |
| 78,50 | 5,50  | 27,48 | 1,7  | 3,4  | 1,46 |
| 71,00 | 4,00  | 24,31 | 12,4 | 23,6 | 3,55 |
| 56,00 | 2,00  | 19,36 | 0,6  | 1,2  | 3,27 |
| 83,40 | 3,40  | 28,01 | 8,8  | 19,1 | 1,39 |
| 58,90 | 0,90  | 22,94 | 0,6  | 1,2  | 1,96 |
| 61,50 | 1,50  | 21,77 | 0,6  | 1,2  | 3,35 |
| 54,50 | -0,50 | 22,31 | 0,8  | 1,6  | 4,40 |
| 71,40 | 4,40  | 22,13 | 1,4  | 3,2  | 1,40 |
| 79,60 | 4,60  | 29,30 | 2,0  | 4,2  | 3,23 |

|       |        |       |      |      |      |
|-------|--------|-------|------|------|------|
| 46,30 | 0,30   | 20,44 | 2,7  | 5,6  | 0,10 |
| 61,70 | -0,30  | 20,24 | 2,7  | 6,4  | NAN  |
| 56,90 | -1,10  | 20,80 | 0,6  | 1,4  | 1,65 |
| 50,00 | 0,00   | 19,78 | 3,8  | 8,2  | 0,84 |
| 69,40 | 5,90   | 23,61 | 4,6  | 8,4  | 1,74 |
| 59,20 | -0,80  | 24,97 | 1,2  | 2,5  | 0,18 |
| 55,40 | 1,40   | 18,69 | 13,3 | 27,5 | 2,26 |
| 55,00 | 0,00   | 19,72 | 3,4  | 6,6  | NAN  |
| 60,00 | 0,00   | 24,03 | 4,8  | 10,1 | NAN  |
| 58,10 | -1,90  | 21,77 | 0,7  | 1,4  | 3,34 |
| 74,50 | 2,50   | 26,45 | 0,6  | 1,2  | 2,03 |
| 55,00 | -1,00  | 21,60 | 4,7  | 9,3  | 0,08 |
| 54,70 | 1,70   | 23,56 | 0,8  | 1,8  | NAN  |
| 59,40 | 5,40   | 22,19 | 3,7  | 7,7  | 1,61 |
| 48,40 | -1,10  | 18,63 | 1,0  | 1,9  | 0,74 |
| 95,50 | 0,50   | 35,76 | 2,4  | 4,5  | 1,52 |
| 63,30 | 0,70   | 24,76 | 1,6  | 3,3  | 1,13 |
| 66,30 | 4,30   | 22,77 | 0,8  | 1,6  | 2,06 |
| 73,00 | 3,00   | 25,71 | 6,8  | 14,2 | NAN  |
| 60,00 | -1,00  | 24,13 | 1,0  | 1,8  | 0,98 |
| 66,70 | 0,70   | 24,24 | 4,3  | 9,3  | NAN  |
| 63,50 | 3,50   | 23,44 | 8,5  | 20,0 | 6,48 |
| 59,70 | 2,70   | 20,94 | 2,7  | 6,1  | NAN  |
| 50,00 | 1,00   | 20,93 | 10,2 | 20,4 | 1,78 |
| 67,70 | 0,70   | 24,61 | 0,7  | 1,6  | NAN  |
| 59,60 | 2,60   | 19,72 | 0,7  | 1,5  | 2,58 |
| 57,00 | 2,00   | 19,03 | 4,0  | 9,2  | NAN  |
| 52,00 | 2,00   | 17,72 | 1,1  | 2,6  | NAN  |
| 70,50 | -0,50  | 25,46 | 2,0  | 3,9  | 1,15 |
| 48,30 | -10,10 | 25,28 | 3,7  | 7,5  | 2,47 |
| 47,20 | 0,20   | 19,82 | 0,6  | 1,2  | 2,63 |
| NAN   | NAN    | 20,60 | 1,9  | 4,0  | NAN  |
| 64,40 | 1,90   | 21,37 | 1,2  | 2,3  | NAN  |
| 52,50 | 0,50   | 20,06 | 1,1  | 2,2  | NAN  |
| 65,60 | 2,10   | 24,50 | 7,5  | 14,3 | 1,20 |
| 61,30 | 2,30   | 22,48 | 1,2  | 2,4  | 1,73 |
| 64,60 | 6,60   | 22,38 | 1,0  | 2,0  | 1,47 |
| 67,40 | -7,60  | 28,93 | 1,4  | 3,1  | 2,24 |
| 69,80 | 4,80   | 24,17 | 11,4 | 22,8 | NAN  |
| 56,50 | -0,50  | 22,83 | 1,8  | 3,4  | NAN  |
| 54,20 | 2,70   | 19,15 | 8,3  | 16,5 | 2,36 |
| 78,00 | 3,00   | 24,21 | 0,8  | 1,7  | 2,84 |
| 57,90 | 2,90   | 19,49 | 0,6  | 1,3  | 0,54 |
| 57,30 | -0,70  | 21,56 | 2,0  | 4,3  | 5,42 |
| 73,50 | 2,50   | 24,86 | 9,9  | 20,0 | 0,79 |
| 53,20 | -0,80  | 21,91 | 11,2 | 26,2 | NAN  |
| 58,60 | -4,40  | 26,22 | 1,1  | 2,4  | NAN  |
| 52,60 | -0,40  | 19,71 | 0,9  | 1,7  | NAN  |
| 51,30 | 1,80   | 19,83 | 3,3  | 8,0  | 2,00 |
| NAN   | NAN    | 21,88 | 3,9  | 7,3  | 0,93 |

|       |       |       |      |      |       |
|-------|-------|-------|------|------|-------|
| 77,70 | -1,30 | 30,86 | 1,5  | 3,0  | 1,38  |
| 62,50 | 4,50  | 21,30 | 6,7  | 15,6 | 0,99  |
| 57,20 | 2,70  | 24,88 | 3,4  | 5,8  | 1,72  |
| 69,80 | 4,80  | 28,13 | 1,9  | 4,0  | 2,71  |
| 51,70 | 1,20  | 23,69 | 5,6  | 10,0 | 1,18  |
| 59,80 | -0,20 | 25,30 | 1,2  | 2,3  | 3,58  |
| 83,20 | 0,20  | 29,76 | 0,5  | 1,2  | 5,83  |
| 83,00 | 2,00  | 28,03 | 1,5  | 3,4  | 1,06  |
| 61,40 | 1,90  | 23,24 | 1,1  | 2,4  | 2,47  |
| 55,50 | 1,50  | 21,63 | 1,1  | 2,5  | 0,81  |
| 57,40 | 0,40  | 22,83 | 1,1  | 2,2  | NAN   |
| 59,60 | 3,10  | 21,80 | 2,3  | 4,6  | 1,09  |
| 58,20 | 2,20  | 21,08 | 1,8  | 3,4  | 0,46  |
| 80,50 | 1,00  | 31,45 | 2,8  | 5,4  | 2,08  |
| 48,70 | 0,20  | 18,48 | 11,0 | 21,7 | 2,47  |
| 68,60 | 3,60  | 26,71 | 0,7  | 1,3  | 3,64  |
| 59,50 | 3,50  | 23,61 | 4,1  | 9,3  | 11,50 |
| 56,70 | 2,20  | 20,26 | 0,9  | 2,0  | NAN   |
| 58,80 | 3,30  | 19,90 | 3,7  | 6,6  | 1,37  |
| 83,40 | 0,40  | 31,24 | 2,5  | 4,8  | 3,51  |
| 68,40 | -1,60 | 28,40 | 1,4  | 2,9  | 0,63  |
| 51,90 | 3,90  | 19,23 | 7,9  | 16,4 | 0,62  |
| 69,50 | 4,00  | 24,35 | 0,7  | 1,3  | 4,24  |
| 54,30 | -0,20 | 19,08 | 10,2 | 21,8 | NAN   |
| 70,40 | 6,40  | 25,32 | 1,9  | 3,4  | 1,91  |
| 67,00 | 5,00  | 25,48 | 1,3  | 2,8  | 0,57  |
| 55,10 | 0,40  | 22,19 | 1,1  | 2,4  | 1,72  |
| 82,10 | 0,60  | 33,49 | 1,5  | 2,8  | 1,39  |
| 78,20 | 3,20  | 25,35 | 0,9  | 1,7  | 2,16  |
| 53,10 | 1,10  | 19,57 | 4,0  | 7,7  | 0,57  |
| 54,00 | 3,00  | 19,43 | 0,6  | 1,2  | 0,14  |
| 59,40 | 2,40  | 19,96 | 1,0  | 1,8  | 3,93  |
| 62,00 | -0,50 | 19,73 | 1,0  | 1,9  | 1,48  |
| 53,10 | -4,90 | 22,66 | 3,4  | 7,3  | 0,79  |
| 61,60 | 2,60  | 22,21 | 6,7  | 13,6 | 1,06  |
| 63,50 | 0,00  | 24,80 | 1,6  | 3,0  | 2,19  |
| 60,40 | 0,90  | 19,43 | 1,2  | 2,3  | 0,36  |
| 47,10 | 0,10  | 20,89 | 6,7  | 13,6 | 2,10  |
| 56,40 | -7,60 | 24,39 | 2,0  | 4,4  | 1,31  |
| 49,70 | 4,70  | 20,00 | 2,2  | 4,3  | 0,08  |
| 56,30 | 2,80  | 20,90 | 0,9  | 2,0  | NAN   |
| 56,50 | 1,00  | 24,02 | 1,0  | 1,8  | 0,54  |
| 59,60 | 1,60  | 24,14 | 0,8  | 1,6  | 1,59  |
| 59,20 | 2,20  | 21,45 | 1,7  | 3,2  | 1,40  |
| 68,30 | 5,80  | 22,41 | 0,8  | 1,6  | 0,93  |
| 57,80 | 0,80  | 19,96 | 0,6  | 1,3  | 3,65  |
| 88,50 | 4,50  | 27,43 | 0,9  | 1,7  | 1,80  |
| 62,10 | 2,90  | 22,84 | 4,7  | 9,2  | 1,82  |
| 57,90 | 0,90  | 17,99 | 6,5  | 11,8 | 0,33  |
| 71,60 | 5,60  | 25,78 | 2,4  | 4,6  | 6,63  |

|       |       |       |      |      |      |
|-------|-------|-------|------|------|------|
| 55,00 | 1,00  | 23,07 | 0,8  | 1,8  | 2,36 |
| 57,50 | 5,00  | 21,85 | 3,7  | 7,0  | 2,55 |
| 75,30 | -0,50 | 28,88 | 1,7  | 3,5  | 0,77 |
| 72,00 | 0,00  | 25,82 | 4,8  | 9,8  | 2,27 |
| 60,30 | 3,30  | 23,12 | 2,4  | 4,8  | 2,75 |
| 64,90 | 4,40  | 20,93 | 5,1  | 11,0 | NAN  |
| 56,30 | -0,70 | 21,45 | 1,0  | 2,1  | 1,68 |
| NAN   | NAN   | 19,82 | 7,0  | 14,5 | NAN  |
| 61,10 | 3,10  | 20,31 | 2,7  | 5,0  | 2,14 |
| 74,70 | 7,70  | 24,02 | 0,6  | 1,4  | 0,21 |
| 61,60 | -4,40 | 27,47 | 1,4  | 2,8  | 3,46 |
| 56,50 | -2,50 | 24,24 | 0,9  | 1,7  | NAN  |
| 55,70 | 2,70  | 19,95 | 0,7  | 1,3  | 1,79 |
| 52,20 | 3,70  | 19,43 | 8,5  | 15,2 | NAN  |
| 64,90 | 13,40 | 20,63 | 2,2  | 4,6  | 1,27 |
| 67,80 | 0,80  | 26,84 | 3,0  | 5,5  | NAN  |
| 53,90 | 2,90  | 20,43 | 2,1  | 3,8  | 2,13 |
| 61,90 | 4,90  | 20,44 | 4,4  | 9,2  | 3,58 |
| 59,00 | -1,00 | 20,76 | 0,8  | 1,4  | 1,11 |
| 54,20 | -5,80 | 23,44 | 7,1  | 13,0 | NAN  |
| 57,30 | 2,30  | 19,72 | 0,6  | 1,3  | NAN  |
| 59,40 | 2,40  | 21,72 | 2,0  | 3,9  | 0,89 |
| 90,00 | 3,00  | 32,35 | 0,8  | 1,5  | 2,35 |
| 81,00 | -2,00 | 31,63 | 3,2  | 6,6  | 2,23 |
| 65,00 | 2,50  | 21,13 | 4,4  | 9,7  | NAN  |
| 61,70 | 1,70  | 21,26 | 2,6  | 5,4  | 0,99 |
| 77,90 | 1,90  | 32,47 | 2,6  | 5,4  | 0,98 |
| NAN   | NAN   | 19,74 | 1,2  | 3,0  | NAN  |
| 63,20 | 8,20  | 20,70 | 0,8  | 1,5  | 1,01 |
| 59,30 | -0,70 | 25,63 | 1,1  | 2,2  | NAN  |
| 54,90 | 1,90  | 20,96 | 9,0  | 16,2 | NAN  |
| 76,30 | 2,80  | 24,84 | 1,5  | 2,9  | 1,14 |
| 63,00 | 2,00  | 23,24 | 0,9  | 1,8  | 0,39 |
| 71,20 | 1,70  | 23,49 | 2,9  | 5,6  | 2,09 |
| 63,60 | 3,60  | 22,86 | 5,7  | 10,5 | NAN  |
| 66,40 | 4,40  | 22,50 | 1,9  | 3,7  | 2,34 |
| 52,40 | 1,40  | 18,96 | 0,6  | 1,2  | 0,67 |
| 61,90 | 0,90  | 23,24 | 3,7  | 8,2  | 3,57 |
| 82,30 | 5,30  | 27,94 | 6,6  | 12,2 | 0,30 |
| 75,90 | 5,90  | 26,67 | 1,0  | 1,8  | 2,33 |
| 69,60 | 1,60  | 24,09 | 0,9  | 2,1  | 3,32 |
| 69,70 | 2,70  | 23,46 | 10,2 | 18,8 | 2,08 |
| 73,30 | 7,30  | 24,84 | 4,2  | 8,5  | 2,01 |
| 61,10 | 3,10  | 22,94 | 1,0  | 2,3  | NAN  |
| 60,00 | 2,50  | 21,12 | 4,5  | 8,1  | 3,16 |
| 57,20 | 4,20  | 22,35 | 0,6  | 1,4  | 3,49 |
| 51,00 | 0,00  | 18,96 | 1,3  | 2,6  | 3,15 |
| 71,20 | 1,20  | 25,10 | 1,1  | 2,3  | 3,20 |
| 55,30 | 2,30  | 17,92 | 2,6  | 5,1  | 3,24 |
| 78,70 | -2,30 | 30,12 | 15,6 | 30,0 | 2,55 |

|       |       |       |      |      |      |
|-------|-------|-------|------|------|------|
| 69,00 | 3,00  | 27,47 | 12,7 | 25,4 | 1,57 |
| 69,20 | 0,20  | 23,32 | 1,8  | 3,3  | 0,63 |
| 73,10 | 3,10  | 28,04 | 7,7  | 13,9 | 2,57 |
| 57,90 | -0,10 | 22,10 | 7,2  | 13,3 | 1,85 |
| 66,10 | 1,10  | 25,39 | 4,6  | 8,8  | 1,51 |
| 64,50 | 0,50  | 25,64 | 1,7  | 3,3  | 1,11 |
| 87,50 | -1,80 | 32,80 | 2,1  | 3,8  | 1,50 |
| 66,20 | 2,20  | 22,95 | 1,2  | 2,4  | 1,15 |
| 64,80 | -0,20 | 25,08 | 1,0  | 2,1  | NAN  |
| 76,30 | 4,30  | 27,78 | 8,8  | 16,0 | 0,45 |
| 60,80 | -2,20 | 28,00 | 3,3  | 6,0  | 1,92 |
| 66,20 | -8,80 | 27,55 | 1,2  | 2,4  | 1,91 |
| 52,60 | 1,60  | 21,23 | 1,6  | 3,5  | 3,31 |
| 98,00 | 3,00  | 32,11 | 2,4  | 4,3  | 2,64 |
| 52,60 | 0,60  | 21,10 | 0,8  | 1,8  | NAN  |
| 79,60 | -4,40 | 32,81 | 1,1  | 2,0  | 0,95 |

| FT4 (ng/dl)<br>12 gw | Adiponectin (mcg/mL)<br>12 gw | IL6 (pg/mL)<br>12 gw | Leptin (ng/ml)<br>12 gw | TNF alpha<br>(pg/mL) 12<br>gw | Systolic BP<br>(mmHg) 12<br>gw |
|----------------------|-------------------------------|----------------------|-------------------------|-------------------------------|--------------------------------|
| 8,83                 | 23,40                         | 3,04                 | 2,85                    | 2,16                          | NAN                            |
| 8,68                 | 5,15                          | 4,99                 | 29,18                   | 3,65                          | NAN                            |
| 8,59                 | 20,37                         | 5,19                 | 14,34                   | 3,42                          | NAN                            |
| NAN                  | 26,43                         | 7,19                 | 20,16                   | 2,96                          | NAN                            |
| 8,08                 | 24,15                         | 4,72                 | 7,72                    | 3,44                          | NAN                            |
| 9,76                 | 19,10                         | 3,38                 | 1,65                    | 1,46                          | NAN                            |
| 8,25                 | 12,01                         | 1,57                 | 1,59                    | 2,61                          | NAN                            |
| 8,46                 | 7,56                          | 2,17                 | 28,81                   | 1,37                          | NAN                            |
| 9,63                 | 19,39                         | 1,43                 | 11,57                   | 4,83                          | NAN                            |
| 6,43                 | 20,72                         | 2,78                 | 19,65                   | 2,54                          | NAN                            |
| 8,73                 | 26,73                         | 1,97                 | 5,22                    | 1,07                          | NAN                            |
| NAN                  | 33,53                         | 1,29                 | 22,16                   | 1,90                          | NAN                            |
| 9,21                 | 14,81                         | 4,05                 | 2,35                    | 0,74                          | NAN                            |
| NAN                  | 14,82                         | 1,63                 | 14,86                   | 2,72                          | NAN                            |
| 8,20                 | 28,41                         | 2,71                 | 3,60                    | 4,16                          | NAN                            |
| 10,77                | 35,05                         | 25,51                | 4,83                    | 2,50                          | NAN                            |
| 10,27                | 25,95                         | 10,12                | 4,53                    | 2,92                          | NAN                            |
| 8,43                 | 14,11                         | 6,62                 | 5,19                    | 4,32                          | NAN                            |
| 15,90                | 34,94                         | 3,31                 | 3,76                    | 17,96                         | NAN                            |
| 7,17                 | 6,42                          | 2,52                 | 13,66                   | 11,92                         | NAN                            |
| 7,31                 | 29,08                         | 9,52                 | 2,92                    | 4,74                          | NAN                            |
| 9,72                 | 26,43                         | 18,39                | 8,08                    | 9,06                          | NAN                            |
| 9,45                 | 21,89                         | 2,81                 | 24,19                   | 4,86                          | NAN                            |
| 8,50                 | 30,73                         | 6,31                 | 7,29                    | 5,20                          | NAN                            |
| 8,97                 | 28,09                         | 3,71                 | 26,54                   | 5,34                          | NAN                            |
| 8,44                 | 22,17                         | 9,42                 | 3,39                    | 5,46                          | NAN                            |
| 6,19                 | 27,35                         | 1,51                 | 8,07                    | 5,99                          | NAN                            |
| NAN                  | 46,77                         | 3,31                 | 16,15                   | 6,23                          | NAN                            |
| 9,97                 | 43,07                         | 2,27                 | 3,80                    | 1,29                          | NAN                            |
| NAN                  | 27,38                         | 9,14                 | 6,17                    | 15,36                         | NAN                            |
| 7,20                 | 9,07                          | 18,55                | 14,56                   | 9,38                          | NAN                            |
| 9,02                 | 20,69                         | 6,50                 | 6,34                    | 11,80                         | NAN                            |
| 7,77                 | 26,84                         | 0,01                 | 3,69                    | 4,03                          | NAN                            |
| 8,08                 | 18,24                         | 15,01                | 8,38                    | 3,36                          | NAN                            |
| 9,43                 | 16,80                         | 2,31                 | 19,63                   | 4,32                          | NAN                            |
| 9,55                 | 28,90                         | 2,31                 | 4,78                    | 0,01                          | NAN                            |
| 10,33                | 35,22                         | 8,16                 | 1,87                    | 2,65                          | NAN                            |
| 9,61                 | 11,32                         | 5,41                 | 25,41                   | 1,59                          | NAN                            |
| 6,71                 | 7,17                          | 3,69                 | 19,12                   | 4,90                          | NAN                            |
| NAN                  | 16,21                         | 4,10                 | 13,09                   | 3,58                          | NAN                            |
| NAN                  | 6,14                          | 1,99                 | 18,46                   | 4,87                          | NAN                            |
| 6,85                 | 18,15                         | 13,83                | 13,83                   | 2,47                          | NAN                            |
| 7,97                 | 19,41                         | 0,01                 | 20,85                   | 5,26                          | NAN                            |
| 7,53                 | 14,19                         | 11,67                | 4,80                    | 4,35                          | NAN                            |
| 9,34                 | 34,22                         | 0,01                 | 6,18                    | 2,41                          | NAN                            |
| 9,13                 | 17,10                         | 1,54                 | 17,95                   | 3,63                          | NAN                            |
| 8,70                 | 31,04                         | 54,39                | 2,00                    | 4,58                          | NAN                            |



|       |       |       |       |      |     |
|-------|-------|-------|-------|------|-----|
| 8,41  | 30,45 | 2,85  | 5,02  | 2,41 | NAN |
| 8,80  | 31,01 | 2,39  | 9,38  | 3,05 | NAN |
| 9,10  | 20,43 | 17,77 | 14,05 | 3,76 | NAN |
| 10,03 | 27,69 | 3,75  | 27,64 | 4,48 | NAN |
| 12,87 | 13,19 | 2,87  | 31,20 | 2,94 | NAN |
| NAN   | 21,60 | 0,87  | 2,84  | 3,23 | NAN |
| 16,84 | 37,60 | 2,39  | 6,05  | 3,70 | NAN |
| NAN   | NAN   | NAN   | NAN   | NAN  | NAN |
| 7,54  | 20,43 | 10,07 | 5,79  | 1,78 | NAN |
| 6,74  | 26,27 | 1,92  | 5,86  | 2,48 | NAN |
| 9,16  | 21,30 | 1,29  | 7,58  | 2,19 | NAN |
| 8,57  | 38,12 | 1,77  | 4,24  | 2,12 | NAN |
| 7,94  | NAN   | 2,08  | 17,91 | 2,71 | NAN |
| 8,54  | 13,18 | 5,90  | 5,46  | 2,90 | NAN |
| 8,02  | 18,28 | 0,87  | 7,69  | 3,43 | NAN |
| 9,42  | NAN   | NAN   | NAN   | NAN  | NAN |
| 8,32  | 11,72 | 5,38  | 11,28 | 2,32 | NAN |
| 11,43 | 25,97 | 2,05  | 6,15  | 4,35 | NAN |
| 9,89  | 10,54 | 5,96  | 14,09 | 5,14 | NAN |
| 8,50  | 20,99 | 7,58  | 7,90  | 4,54 | NAN |
| NAN   | 11,50 | 8,77  | 11,27 | 2,41 | NAN |
| 10,64 | 37,91 | 0,01  | 6,82  | 4,50 | NAN |
| 8,19  | 11,85 | 1,09  | 13,46 | 2,88 | NAN |
| 8,83  | 27,12 | 7,95  | 2,35  | 4,50 | NAN |
| NAN   | 12,11 | 2,56  | 29,14 | 3,97 | NAN |
| 8,30  | 26,47 | 0,01  | 19,64 | 2,61 | 106 |
| 7,88  | 19,76 | 0,01  | 12,04 | 1,03 | NAN |
| 8,59  | 31,43 | 12,18 | 20,67 | 4,08 | NAN |
| 8,33  | 18,13 | 2,86  | 2,87  | 2,24 | 99  |
| 8,77  | 33,73 | 0,01  | 13,41 | 2,48 | 93  |
| 7,13  | 25,50 | 0,01  | 2,38  | 2,85 | 100 |
| 7,09  | 26,46 | 0,01  | 5,93  | 3,22 | NAN |
| NAN   | 21,59 | 2,61  | 11,01 | 2,67 | NAN |
| 8,09  | 22,83 | 13,47 | 9,90  | 2,01 | NAN |
| 7,21  | 33,57 | 1,86  | 8,87  | 4,63 | NAN |
| 8,39  | 19,37 | 14,13 | 3,69  | 2,95 | 94  |
| 7,23  | 33,89 | 2,21  | 4,92  | 1,78 | 93  |
| NAN   | 5,42  | 0,01  | 6,81  | 2,87 | 108 |
| 8,76  | 9,62  | 0,01  | 6,12  | 3,27 | 106 |
| NAN   | 14,10 | 0,95  | 2,73  | 1,71 | NAN |
| NAN   | 28,84 | 6,03  | 4,76  | 0,71 | 101 |
| 9,99  | 18,30 | 3,58  | 6,91  | 2,42 | 102 |
| NAN   | 10,67 | 0,01  | 13,65 | 4,61 | 120 |
| 9,79  | 31,23 | 1,23  | 1,97  | 2,12 | 96  |
| 9,33  | 29,16 | 3,33  | 2,47  | 0,93 | 115 |
| 7,15  | 10,28 | NAN   | NAN   | NAN  | 100 |
| 7,21  | 19,48 | 6,90  | 8,48  | 0,73 | 102 |
| NAN   | 27,79 | 0,84  | 5,82  | 1,67 | 104 |
| 8,91  | 13,23 | 12,61 | 9,49  | 2,89 | 107 |
| 8,07  | 19,70 | 0,01  | 10,38 | 2,20 | 105 |

|       |       |       |       |       |     |
|-------|-------|-------|-------|-------|-----|
| 8,14  | 23,22 | 7,85  | 3,97  | 2,93  | 101 |
| 7,33  | 20,76 | 2,33  | 2,90  | 1,14  | 97  |
| NAN   | 22,80 | 48,00 | 1,58  | 2,21  | 104 |
| 8,52  | 29,15 | 3,32  | 4,78  | 1,83  | 104 |
| 7,63  | 17,88 | 2,69  | 8,75  | 2,08  | 111 |
| NAN   | 19,63 | 7,29  | 10,78 | 0,77  | 102 |
| 8,05  | 21,58 | 11,75 | 6,47  | 2,09  | 101 |
| 8,74  | 14,97 | 0,01  | 6,13  | 2,21  | 110 |
| 6,18  | 16,48 | 2,33  | 7,30  | 3,29  | 104 |
| 8,88  | NAN   | NAN   | NAN   | NAN   | 111 |
| 7,58  | 25,21 | 1,59  | 6,35  | 1,74  | 104 |
| NAN   | 7,13  | 1,03  | 2,40  | 1,45  | 117 |
| 8,22  | 18,73 | 20,64 | 1,31  | 0,77  | 103 |
| 11,65 | 33,18 | 8,90  | 3,24  | 2,57  | NAN |
| 7,94  | 11,54 | 15,44 | 12,59 | 2,34  | NAN |
| 7,96  | 26,34 | 1,67  | 3,65  | 2,51  | 84  |
| 7,51  | NAN   | NAN   | NAN   | NAN   | 118 |
| 7,97  | 28,95 | 2,46  | 5,44  | 16,61 | 83  |
| 7,21  | 11,30 | 8,38  | 10,79 | 4,36  | 106 |
| 7,45  | 16,64 | 0,84  | 0,45  | 1,87  | 95  |
| 8,86  | 21,40 | 53,97 | 7,55  | 32,73 | 107 |
| 9,85  | 17,13 | 3,48  | 11,93 | 6,90  | 107 |
| 8,50  | 29,85 | 3,48  | 6,42  | 3,11  | 97  |
| 6,80  | 46,29 | 3,87  | 15,20 | 4,02  | 90  |
| 7,82  | 9,53  | 28,60 | 9,27  | 5,31  | 117 |
| 9,74  | 18,75 | 24,43 | 5,91  | 8,91  | 91  |
| 8,92  | 16,41 | 6,19  | 1,45  | 1,94  | 115 |
| NAN   | 21,68 | 0,96  | 15,51 | 2,12  | 142 |
| 8,52  | 14,62 | 13,66 | 13,60 | 4,28  | 95  |
| 7,67  | 22,28 | 4,44  | 2,72  | 5,77  | 104 |
| 8,65  | 17,84 | 18,01 | 25,26 | 6,82  | 127 |
| 7,41  | 42,40 | 23,25 | 7,21  | 8,50  | 113 |
| NAN   | 14,81 | 5,34  | 6,37  | 4,43  | 126 |
| 9,04  | 14,41 | 1,09  | 4,96  | 2,73  | 100 |
| 7,25  | 11,06 | 3,62  | 13,14 | 5,66  | 113 |
| 8,27  | 12,90 | 0,01  | 4,27  | 1,78  | 100 |
| 11,07 | 10,20 | 7,73  | 20,87 | 5,49  | 105 |
| 8,29  | 7,11  | 0,01  | 8,74  | 3,81  | 112 |
| 9,19  | 14,64 | 3,63  | 12,14 | 1,83  | 99  |
| 6,76  | 15,85 | 8,96  | 11,36 | 5,55  | 124 |
| 9,04  | 20,21 | 0,97  | 9,91  | 4,78  | 100 |
| 6,61  | 8,67  | 4,39  | 12,67 | 1,79  | 133 |
| 10,16 | 7,43  | 33,36 | 10,18 | 3,36  | 120 |
| 8,95  | 15,24 | 8,02  | 6,35  | 1,61  | 105 |
| 7,72  | 10,34 | 0,01  | 4,57  | 1,74  | 100 |
| 9,47  | 20,72 | 6,76  | 7,06  | 3,33  | 105 |
| 8,71  | 24,39 | 0,01  | 5,47  | 2,62  | 110 |
| 7,89  | 11,65 | 33,90 | 1,67  | 1,11  | 92  |
| 8,17  | 15,90 | 4,26  | 6,32  | 2,18  | 120 |
| 6,47  | 11,37 | 0,98  | 7,98  | 4,16  | 113 |

|       |       |       |       |      |     |
|-------|-------|-------|-------|------|-----|
| 12,66 | 15,32 | 2,30  | 6,95  | 1,83 | 103 |
| NAN   | 14,10 | 11,88 | 10,05 | 4,70 | 106 |
| 8,13  | 12,41 | 0,01  | 2,86  | 1,61 | 108 |
| 9,16  | 23,49 | 1,47  | 2,17  | 1,23 | 103 |
| 10,00 | 27,68 | 8,46  | 7,80  | 5,57 | 101 |
| 12,92 | 14,20 | 3,26  | 4,47  | 7,18 | 99  |
| 8,52  | 27,94 | 0,01  | 2,60  | 3,64 | 115 |
| NAN   | 8,48  | 0,01  | 1,02  | 1,60 | 102 |
| NAN   | 20,77 | 0,01  | 7,77  | 2,05 | 106 |
| 9,06  | 25,59 | 0,01  | 1,24  | 0,96 | 113 |
| 9,68  | 18,02 | 0,01  | 2,67  | 0,62 | 109 |
| 12,01 | 20,79 | 5,01  | 2,06  | 1,38 | 91  |
| NAN   | 43,93 | 0,01  | 1,87  | 1,11 | 107 |
| 8,18  | 13,44 | 2,23  | 4,76  | 1,88 | 109 |
| 11,67 | 22,40 | 0,01  | 1,70  | 0,58 | 111 |
| 6,14  | 14,23 | 1,57  | 4,32  | 0,54 | 123 |
| 7,69  | 18,78 | 0,01  | 3,58  | 2,55 | 129 |
| 8,53  | 16,41 | 0,01  | 7,63  | 1,17 | 107 |
| NAN   | 12,56 | 8,38  | 15,51 | 4,32 | 108 |
| 10,63 | 31,57 | 2,04  | 6,41  | 3,14 | 93  |
| NAN   | 16,95 | 0,81  | 4,93  | 2,22 | 102 |
| 8,88  | 24,19 | 0,83  | 4,04  | 2,43 | 110 |
| NAN   | 14,22 | 1,59  | 7,39  | 1,88 | 96  |
| 8,46  | 17,73 | 1,19  | 6,33  | 1,80 | 89  |
| NAN   | 17,77 | 1,44  | 16,40 | 3,26 | 90  |
| 7,14  | 9,67  | 0,81  | 5,18  | 1,54 | 110 |
| NAN   | 31,40 | 0,01  | 2,58  | 1,59 | 110 |
| NAN   | 18,65 | 1,88  | 1,11  | 3,22 | 118 |
| 8,09  | 12,85 | 0,01  | 12,75 | 1,20 | 91  |
| 6,94  | 16,00 | 1,03  | 7,24  | 3,30 | 104 |
| 8,45  | 41,14 | 2,49  | 5,56  | 2,62 | 97  |
| NAN   | 17,90 | 0,01  | 5,52  | 4,02 | 85  |
| NAN   | 22,58 | 75,01 | 8,27  | 3,49 | 119 |
| NAN   | 12,54 | 5,10  | 5,59  | 0,01 | 91  |
| 8,64  | 15,80 | 16,41 | 15,90 | 5,60 | 111 |
| 8,19  | 24,87 | 6,67  | 8,76  | 3,18 | 91  |
| 7,76  | 18,94 | 0,01  | 6,40  | 1,60 | 90  |
| 9,59  | 11,45 | 1,95  | 5,73  | 0,01 | 104 |
| NAN   | 12,84 | 3,41  | 25,09 | 2,38 | 116 |
| NAN   | 15,50 | 4,64  | 15,27 | 6,43 | 116 |
| 9,94  | 24,94 | 0,01  | 5,33  | 1,60 | 90  |
| 8,06  | 6,87  | 4,64  | 17,13 | 2,35 | 114 |
| 10,45 | 21,25 | NAN   | NAN   | NAN  | 87  |
| 9,66  | 16,85 | NAN   | NAN   | NAN  | 113 |
| 9,14  | 11,59 | NAN   | NAN   | NAN  | 129 |
| NAN   | 12,04 | NAN   | NAN   | NAN  | 103 |
| NAN   | 16,65 | NAN   | NAN   | NAN  | 100 |
| NAN   | 11,77 | NAN   | NAN   | NAN  | 101 |
| 9,61  | 22,37 | NAN   | NAN   | NAN  | 94  |
| 12,15 | 18,86 | NAN   | NAN   | NAN  | 101 |

|       |       |       |       |      |     |
|-------|-------|-------|-------|------|-----|
| 6,98  | 13,74 | NAN   | NAN   | NAN  | 124 |
| 8,11  | 11,26 | NAN   | NAN   | NAN  | 122 |
| 8,11  | 8,64  | NAN   | NAN   | NAN  | 107 |
| 9,41  | 14,58 | NAN   | NAN   | NAN  | 105 |
| 7,26  | 15,98 | NAN   | NAN   | NAN  | 109 |
| 7,93  | 20,78 | 0,01  | 8,50  | 2,43 | 110 |
| 10,19 | 6,77  | NAN   | NAN   | NAN  | 107 |
| 9,26  | 14,69 | 0,01  | 10,01 | 1,29 | 114 |
| 9,84  | 13,15 | 0,01  | 14,82 | 3,79 | 134 |
| 9,57  | 16,01 | NAN   | NAN   | NAN  | 106 |
| NAN   | 16,28 | 26,79 | 3,55  | 1,45 | 99  |
| 10,79 | 22,83 | NAN   | NAN   | NAN  | 112 |
| 10,48 | 21,04 | NAN   | NAN   | NAN  | 107 |
| 9,52  | 15,06 | 0,01  | 17,82 | 1,85 | 91  |
| 7,70  | 20,53 | NAN   | NAN   | NAN  | 110 |
| 7,79  | 42,34 | 45,01 | 10,84 | 8,44 | 110 |
| 6,87  | 21,13 | 29,72 | 8,85  | 1,72 | 103 |
| NAN   | 35,04 | NAN   | NAN   | NAN  | 101 |
| 8,95  | 27,00 | NAN   | NAN   | NAN  | 98  |
| 6,30  | 33,50 | NAN   | NAN   | NAN  | NAN |
| 8,11  | 25,76 | NAN   | NAN   | NAN  | 92  |
| 7,80  | 15,17 | 2,30  | 5,10  | 2,52 | 94  |
| 8,76  | 12,40 | 0,01  | 7,30  | 1,92 | 108 |
| NAN   | 30,35 | 89,77 | 1,04  | 2,89 | 109 |
| 8,42  | 15,86 | 0,01  | 14,04 | 1,99 | 95  |
| 7,60  | 12,94 | 0,01  | 11,41 | 1,13 | 104 |
| 8,99  | 12,45 | 5,47  | 7,04  | 4,03 | 115 |
| 8,08  | 7,79  | 0,87  | 22,89 | 3,80 | NAN |
| 8,83  | 15,09 | 2,30  | 9,95  | 2,43 | 113 |
| 8,65  | 21,30 | 1,49  | 5,48  | 4,00 | 92  |
| 9,05  | 29,11 | 1,38  | 3,07  | 6,21 | 98  |
| 8,87  | 18,93 | 38,94 | 5,62  | 3,19 | 95  |
| 9,39  | 10,62 | 0,78  | 5,15  | 2,99 | 105 |
| 9,89  | 30,98 | 0,01  | 1,31  | 1,94 | 98  |
| 12,09 | 35,03 | 0,01  | 7,89  | 2,94 | 94  |
| 8,68  | 11,26 | 25,89 | 7,46  | 2,29 | 124 |
| 8,50  | 30,98 | 0,01  | 2,42  | 2,20 | 112 |
| 10,57 | NAN   | 0,01  | 3,90  | 1,99 | 94  |
| 7,77  | NAN   | 20,76 | 1,52  | 2,09 | 89  |
| 10,99 | NAN   | 2,45  | 10,80 | 4,06 | 109 |
| NAN   | NAN   | 0,01  | 8,34  | 3,33 | 116 |
| 9,81  | NAN   | 0,80  | 5,29  | 3,09 | 110 |
| 7,09  | NAN   | NAN   | NAN   | NAN  | 100 |
| 9,86  | NAN   | 0,01  | 10,41 | 1,57 | 102 |
| 7,86  | NAN   | 0,84  | 6,48  | 2,27 | 102 |
| 9,58  | NAN   | 0,62  | 1,02  | 2,30 | 86  |
| 8,97  | NAN   | 0,01  | 9,04  | 1,18 | 113 |
| 9,23  | NAN   | 10,96 | 7,48  | 3,31 | 112 |
| 9,25  | NAN   | 0,01  | 2,04  | 2,50 | 96  |
| 7,63  | NAN   | NAN   | NAN   | NAN  | 105 |

|       |     |       |       |      |     |
|-------|-----|-------|-------|------|-----|
| 8,04  | NAN | 0,01  | 2,18  | 2,00 | 94  |
| 8,60  | NAN | 7,71  | 3,97  | 2,21 | 110 |
| 9,20  | NAN | 4,87  | 9,42  | 2,08 | 112 |
| 9,49  | NAN | 0,01  | 1,46  | 1,84 | 124 |
| 8,07  | NAN | NAN   | NAN   | NAN  | 123 |
| NAN   | NAN | 6,03  | 3,19  | 1,40 | 108 |
| 9,38  | NAN | 51,62 | 2,79  | 2,24 | 105 |
| NAN   | NAN | 0,01  | 0,66  | 1,18 | 100 |
| 10,60 | NAN | 0,01  | 2,85  | 2,73 | 108 |
| 9,46  | NAN | 0,01  | 9,03  | 0,22 | 119 |
| 9,55  | NAN | NAN   | NAN   | NAN  | 102 |
| NAN   | NAN | 0,01  | 3,74  | 0,22 | 90  |
| 7,93  | NAN | 4,68  | 1,21  | 0,01 | 104 |
| NAN   | NAN | 4,58  | 1,87  | 0,22 | 107 |
| 5,99  | NAN | 0,01  | 2,73  | 1,08 | 114 |
| NAN   | NAN | NAN   | NAN   | NAN  | 106 |
| 7,83  | NAN | NAN   | NAN   | NAN  | 101 |
| 6,30  | NAN | NAN   | NAN   | NAN  | 101 |
| 8,23  | NAN | NAN   | NAN   | NAN  | 102 |
| NAN   | NAN | NAN   | NAN   | NAN  | 102 |
| NAN   | NAN | NAN   | NAN   | NAN  | 99  |
| 8,82  | NAN | NAN   | NAN   | NAN  | 106 |
| 7,22  | NAN | NAN   | NAN   | NAN  | 107 |
| 6,89  | NAN | 40,80 | 12,67 | 1,83 | 117 |
| NAN   | NAN | 0,01  | 5,24  | 3,37 | 117 |
| 10,39 | NAN | 32,74 | 11,56 | 4,56 | 103 |
| 7,88  | NAN | 0,01  | 24,28 | 7,50 | 128 |
| NAN   | NAN | NAN   | NAN   | NAN  | NAN |
| 9,30  | NAN | NAN   | NAN   | NAN  | 99  |
| NAN   | NAN | 5,70  | 11,35 | 3,11 | 117 |
| NAN   | NAN | 0,01  | 3,38  | 2,25 | 112 |
| 11,46 | NAN | 0,01  | 18,02 | 3,84 | 112 |
| 8,04  | NAN | NAN   | NAN   | NAN  | 94  |
| 7,54  | NAN | NAN   | NAN   | NAN  | 115 |
| NAN   | NAN | 0,01  | 10,13 | 2,18 | 117 |
| 7,60  | NAN | 0,01  | 9,67  | 1,68 | 102 |
| 10,25 | NAN | 0,82  | 7,67  | 5,23 | 112 |
| 9,00  | NAN | 2,58  | 1,83  | 2,52 | 103 |
| 14,21 | NAN | 2,10  | 16,75 | 2,28 | 116 |
| 7,80  | NAN | 0,01  | 16,14 | 1,72 | 95  |
| 7,26  | NAN | NAN   | NAN   | NAN  | 112 |
| 8,53  | NAN | 3,74  | 12,61 | 1,69 | 119 |
| 8,12  | NAN | 0,01  | 13,92 | 1,94 | 104 |
| NAN   | NAN | 0,01  | 7,95  | 1,36 | 107 |
| 9,20  | NAN | 0,01  | 12,10 | 1,99 | 104 |
| 6,84  | NAN | 0,82  | 2,98  | 2,50 | 110 |
| 9,33  | NAN | NAN   | NAN   | NAN  | NAN |
| 9,29  | NAN | NAN   | NAN   | NAN  | 108 |
| 9,08  | NAN | NAN   | NAN   | NAN  | 100 |
| 8,13  | NAN | NAN   | NAN   | NAN  | 108 |

|      |     |      |       |      |     |
|------|-----|------|-------|------|-----|
| 8,45 | NAN | 3,90 | 11,12 | 2,07 | 123 |
| 9,97 | NAN | 0,01 | 9,73  | 3,25 | 126 |
| 7,74 | NAN | 8,62 | 12,97 | 1,11 | 110 |
| 8,90 | NAN | 0,01 | 2,09  | 1,77 | 91  |
| 7,78 | NAN | 0,01 | 6,16  | 2,03 | 127 |
| 9,04 | NAN | 1,35 | 16,31 | 2,14 | 101 |
| 7,23 | NAN | 0,01 | 24,12 | 2,23 | 114 |
| 6,98 | NAN | 0,01 | 6,46  | 1,37 | 103 |
| NAN  | NAN | 0,01 | 5,01  | 2,47 | 110 |
| 9,42 | NAN | 4,85 | 14,29 | 3,08 | 143 |
| 6,91 | NAN | 3,17 | 13,24 | 2,12 | 114 |
| 7,92 | NAN | 0,01 | 12,57 | 3,38 | 114 |
| 7,81 | NAN | NAN  | NAN   | NAN  | 99  |
| 8,01 | NAN | NAN  | NAN   | NAN  | 113 |
| NAN  | NAN | NAN  | NAN   | NAN  | 100 |
| 8,70 | NAN | NAN  | NAN   | NAN  | 110 |

| Diastolic BP<br>(mm Hg) 12<br>gw | SMOKERS | Fasting Blood<br>Glucose (mg/dl)<br>12 gw | Fasting Cholesterol<br>(mg/dl) 12 gw | Fasting Tryglicerides<br>(mg/dl) 12 gw | HbA1c (%)<br>12 gw |
|----------------------------------|---------|-------------------------------------------|--------------------------------------|----------------------------------------|--------------------|
| NAN                              | 1       | 77                                        | 170                                  | 61                                     | NAN                |
| NAN                              | 1       | 82                                        | 191                                  | 57                                     | NAN                |
| NAN                              | 2       | 82                                        | 217                                  | 95                                     | NAN                |
| NAN                              | 2       | 89                                        | NAN                                  | NAN                                    | NAN                |
| NAN                              | 1       | 76                                        | 161                                  | 43                                     | NAN                |
| NAN                              | 0       | 86                                        | 113                                  | 74                                     | NAN                |
| NAN                              | 1       | 90                                        | 196                                  | 75                                     | NAN                |
| NAN                              | 1       | 85                                        | 190                                  | 84                                     | NAN                |
| NAN                              | 0       | 89                                        | 173                                  | 101                                    | NAN                |
| NAN                              | 0       | 86                                        | 157                                  | 95                                     | NAN                |
| NAN                              | 0       | 84                                        | 229                                  | 94                                     | NAN                |
| NAN                              | 1       | 77                                        | NAN                                  | NAN                                    | NAN                |
| NAN                              | 2       | 90                                        | 167                                  | 54                                     | NAN                |
| NAN                              | 0       | 87                                        | NAN                                  | NAN                                    | NAN                |
| NAN                              | 3       | 81                                        | 124                                  | 51                                     | NAN                |
| NAN                              | 0       | 89                                        | 183                                  | 82                                     | NAN                |
| NAN                              | 0       | 81                                        | 161                                  | 107                                    | NAN                |
| NAN                              | 1       | 84                                        | 113                                  | 50                                     | NAN                |
| NAN                              | 0       | 82                                        | 142                                  | 60                                     | NAN                |
| NAN                              | 2       | 87                                        | 122                                  | 137                                    | NAN                |
| NAN                              | 1       | 70                                        | 185                                  | 66                                     | NAN                |
| NAN                              | 0       | 86                                        | NAN                                  | NAN                                    | NAN                |
| NAN                              | 0       | 88                                        | 176                                  | 63                                     | NAN                |
| NAN                              | 1       | 86                                        | 198                                  | 74                                     | NAN                |
| NAN                              | 2       | 84                                        | 183                                  | 99                                     | NAN                |
| NAN                              | 0       | 85                                        | 153                                  | 104                                    | NAN                |
| NAN                              | 0       | 85                                        | 244                                  | 104                                    | NAN                |
| NAN                              | 1       | 74                                        | NAN                                  | NAN                                    | NAN                |
| NAN                              | 1       | 87                                        | 202                                  | 44                                     | NAN                |
| NAN                              | 2       | 69                                        | NAN                                  | NAN                                    | NAN                |
| NAN                              | 2       | 92                                        | 213                                  | 171                                    | NAN                |
| NAN                              | 0       | 85                                        | 163                                  | 54                                     | NAN                |
| NAN                              | 0       | 72                                        | 161                                  | 49                                     | NAN                |
| NAN                              | 0       | 78                                        | 137                                  | 96                                     | NAN                |
| NAN                              | 1       | 88                                        | 154                                  | 100                                    | 5,0                |
| NAN                              | 0       | 82                                        | 174                                  | 95                                     | NAN                |
| NAN                              | 0       | 81                                        | 184                                  | 56                                     | NAN                |
| NAN                              | 0       | 75                                        | 155                                  | 114                                    | NAN                |
| NAN                              | 0       | 76                                        | 199                                  | 243                                    | NAN                |
| NAN                              | 1       | 67                                        | NAN                                  | NAN                                    | NAN                |
| NAN                              | 1       | 72                                        | NAN                                  | NAN                                    | NAN                |
| NAN                              | 0       | 91                                        | 234                                  | 112                                    | NAN                |
| NAN                              | 0       | 88                                        | 141                                  | 66                                     | NAN                |
| NAN                              | 2       | 75                                        | 216                                  | 111                                    | NAN                |
| NAN                              | 1       | 86                                        | 208                                  | 45                                     | NAN                |
| NAN                              | 0       | 80                                        | 201                                  | 69                                     | NAN                |
| NAN                              | 0       | 84                                        | 227                                  | 68                                     | NAN                |

|     |   |    |     |     |     |
|-----|---|----|-----|-----|-----|
| NAN | 0 | 77 | 173 | 50  | NAN |
| NAN | 1 | 76 | 205 | 70  | NAN |
| NAN | 0 | 89 | 150 | 142 | NAN |
| NAN | 1 | 73 | NAN | NAN | NAN |
| NAN | 9 | 78 | NAN | NAN | NAN |
| NAN | 0 | 77 | NAN | NAN | NAN |
| NAN | 0 | 82 | 134 | 86  | NAN |
| NAN | 0 | 74 | NAN | NAN | NAN |
| NAN | 0 | 83 | 150 | 41  | NAN |
| NAN | 0 | 69 | 222 | 97  | NAN |
| NAN | 0 | 82 | 174 | 97  | NAN |
| NAN | 0 | 80 | 182 | 67  | NAN |
| NAN | 0 | 82 | 123 | 69  | NAN |
| NAN | 3 | 81 | 188 | 68  | NAN |
| NAN | 0 | 83 | 169 | 90  | NAN |
| NAN | 0 | 78 | 219 | 94  | 5,1 |
| NAN | 0 | 85 | 295 | 156 | NAN |
| NAN | 0 | 78 | 195 | 56  | NAN |
| NAN | 0 | 69 | NAN | NAN | NAN |
| NAN | 1 | 90 | 214 | 80  | NAN |
| NAN | 1 | 73 | NAN | NAN | NAN |
| NAN | 0 | 82 | 163 | 62  | NAN |
| NAN | 0 | 79 | 176 | 169 | NAN |
| NAN | 3 | 84 | 182 | 70  | NAN |
| NAN | 0 | 86 | NAN | NAN | NAN |
| 54  | 0 | 75 | 128 | 65  | NAN |
| NAN | 2 | 88 | 180 | 70  | NAN |
| NAN | 3 | 86 | 158 | 83  | NAN |
| 57  | 1 | 68 | 159 | 54  | NAN |
| 60  | 1 | 88 | 159 | 48  | NAN |
| 65  | 0 | 72 | 136 | 61  | NAN |
| NAN | 1 | 84 | 149 | 88  | NAN |
| NAN | 1 | 74 | NAN | NAN | NAN |
| NAN | 2 | 68 | 186 | 74  | NAN |
| NAN | 0 | 65 | 172 | 73  | NAN |
| 69  | 3 | 76 | 169 | 75  | NAN |
| 60  | 0 | 67 | 165 | 86  | NAN |
| 73  | 0 | 77 | NAN | NAN | NAN |
| 51  | 0 | 75 | 186 | 161 | NAN |
| NAN | 0 | 69 | NAN | NAN | NAN |
| 64  | 1 | 88 | NAN | NAN | NAN |
| 39  | 0 | 87 | 207 | 117 | NAN |
| 78  | 0 | 69 | NAN | NAN | NAN |
| 57  | 1 | 83 | 169 | 77  | NAN |
| 71  | 1 | 87 | NAN | NAN | NAN |
| 58  | 2 | 86 | 214 | 157 | NAN |
| 58  | 2 | 72 | 162 | 37  | NAN |
| 69  | 0 | 88 | NAN | NAN | NAN |
| 67  | 0 | 81 | 168 | 81  | NAN |
| 53  | 0 | 77 | NAN | NAN | NAN |



|     |   |    |     |     |     |
|-----|---|----|-----|-----|-----|
| 61  | 0 | 85 | 173 | 56  | NAN |
| 58  | 2 | 74 | 207 | 87  | NAN |
| 57  | 0 | 84 | NAN | NAN | NAN |
| 67  | 0 | 91 | 120 | 59  | NAN |
| 68  | 1 | 85 | 140 | 102 | NAN |
| 58  | 0 | 83 | NAN | NAN | NAN |
| 63  | 2 | 81 | 167 | 41  | NAN |
| 59  | 0 | 81 | 217 | 115 | NAN |
| 55  | 0 | 88 | 187 | 160 | NAN |
| 62  | 0 | 87 | 168 | 70  | NAN |
| 63  | 1 | 78 | 190 | 69  | NAN |
| 60  | 0 | 77 | NAN | NAN | NAN |
| 67  | 0 | 82 | 178 | 80  | NAN |
| NAN | 1 | 91 | 150 | 50  | NAN |
| NAN | 1 | 85 | 161 | 68  | NAN |
| 56  | 0 | 91 | 173 | 88  | NAN |
| 65  | 1 | 76 | 190 | 85  | NAN |
| 58  | 2 | 83 | 180 | 66  | NAN |
| 75  | 3 | 68 | 170 | 72  | NAN |
| 59  | 0 | 75 | 132 | 50  | NAN |
| 71  | 3 | 74 | 184 | 91  | NAN |
| 68  | 1 | 86 | 182 | 43  | NAN |
| 54  | 3 | 90 | 187 | 61  | NAN |
| 55  | 0 | 90 | 184 | 111 | NAN |
| 68  | 0 | 91 | 209 | 204 | NAN |
| 51  | 3 | 75 | 147 | 44  | NAN |
| 57  | 1 | 73 | NAN | NAN | NAN |
| 92  | 0 | 78 | 179 | 98  | NAN |
| 57  | 0 | 73 | 113 | 72  | NAN |
| 68  | 2 | 85 | 195 | 66  | 5,0 |
| 76  | 2 | 85 | 198 | 132 | NAN |
| 66  | 0 | 83 | 221 | 136 | NAN |
| 76  | 1 | 75 | NAN | NAN | NAN |
| 65  | 1 | 78 | 169 | 43  | NAN |
| 80  | 0 | 82 | 196 | 164 | NAN |
| 60  | 3 | 85 | 170 | 100 | NAN |
| 60  | 0 | 77 | 189 | 97  | NAN |
| 73  | 0 | 89 | 157 | 82  | NAN |
| 63  | 1 | 82 | 182 | 73  | NAN |
| 85  | 1 | 79 | 111 | 63  | NAN |
| 63  | 1 | 79 | 159 | 77  | NAN |
| 68  | 0 | 78 | 234 | 201 | NAN |
| 71  | 0 | 85 | 118 | 39  | NAN |
| 67  | 0 | 82 | 128 | 70  | NAN |
| 63  | 3 | 75 | 190 | 80  | NAN |
| 61  | 0 | 87 | 212 | 56  | NAN |
| 73  | 0 | 79 | 155 | 47  | NAN |
| 51  | 0 | 84 | 206 | 70  | NAN |
| 68  | 1 | 70 | 159 | 29  | NAN |
| 68  | 0 | 79 | 245 | 198 | NAN |

|    |   |    |     |     |     |
|----|---|----|-----|-----|-----|
| 66 | 0 | 78 | 193 | 110 | NAN |
| 66 | 1 | 69 | NAN | NAN | NAN |
| 75 | 0 | 72 | 195 | 89  | NAN |
| 69 | 0 | 74 | 171 | 59  | NAN |
| 68 | 1 | 89 | 174 | 48  | NAN |
| 66 | 1 | 78 | 210 | 123 | NAN |
| 74 | 1 | 78 | 190 | 83  | NAN |
| 64 | 0 | 82 | NAN | NAN | NAN |
| 77 | 0 | 77 | NAN | NAN | NAN |
| 56 | 1 | 78 | 180 | 45  | NAN |
| 77 | 1 | 76 | 96  | 63  | NAN |
| 66 | 0 | 82 | 172 | 122 | NAN |
| 61 | 0 | 72 | NAN | NAN | NAN |
| 60 | 2 | 77 | 192 | 44  | NAN |
| 76 | 2 | 83 | 221 | 89  | NAN |
| 69 | 3 | 85 | 166 | 72  | NAN |
| 85 | 0 | 79 | 187 | 148 | NAN |
| 75 | 1 | 83 | 164 | 76  | NAN |
| 66 | 2 | 77 | NAN | NAN | NAN |
| 68 | 0 | 90 | 206 | 148 | NAN |
| 68 | 1 | 75 | NAN | NAN | NAN |
| 72 | 0 | 69 | NAN | NAN | NAN |
| 64 | 0 | 71 | NAN | NAN | NAN |
| 57 | 1 | 81 | 232 | 125 | NAN |
| 57 | 9 | 73 | NAN | NAN | NAN |
| 73 | 1 | 71 | 206 | 83  | NAN |
| 68 | 1 | 70 | NAN | NAN | NAN |
| 83 | 0 | 70 | NAN | NAN | NAN |
| 57 | 0 | 85 | 182 | 92  | NAN |
| 53 | 0 | 79 | 194 | 86  | NAN |
| 59 | 0 | 77 | 132 | 82  | NAN |
| 51 | 2 | 76 | NAN | NAN | NAN |
| 72 | 0 | 83 | NAN | NAN | NAN |
| 62 | 3 | 83 | NAN | NAN | NAN |
| 63 | 0 | 85 | 208 | 94  | NAN |
| 69 | 1 | 83 | NAN | NAN | NAN |
| 62 | 0 | 78 | 159 | 79  | NAN |
| 63 | 0 | 76 | 129 | 82  | NAN |
| 67 | 2 | 81 | NAN | NAN | NAN |
| 70 | 0 | 85 | 203 | 139 | NAN |
| 56 | 0 | 81 | 162 | 49  | NAN |
| 66 | 2 | 80 | 137 | 55  | NAN |
| 59 | 0 | 78 | 139 | 40  | NAN |
| 73 | 2 | 74 | 190 | 49  | NAN |
| 67 | 1 | 80 | 123 | 47  | NAN |
| 63 | 0 | 69 | NAN | NAN | NAN |
| 69 | 0 | 71 | NAN | NAN | NAN |
| 69 | 0 | 86 | NAN | NAN | NAN |
| 61 | 0 | 68 | 179 | 53  | NAN |
| 62 | 0 | 87 | 197 | 53  | NAN |

|     |   |    |     |     |     |
|-----|---|----|-----|-----|-----|
| 75  | 0 | 80 | 179 | 100 | NAN |
| 76  | 0 | 70 | 161 | 134 | NAN |
| 67  | 0 | 93 | 201 | 147 | NAN |
| 65  | 0 | 75 | 206 | 131 | NAN |
| 67  | 1 | 91 | 170 | 84  | NAN |
| 71  | 0 | 83 | 163 | 86  | NAN |
| 58  | 3 | 72 | 169 | 81  | NAN |
| 78  | 0 | 74 | 170 | 78  | NAN |
| 74  | 0 | 76 | 171 | 71  | NAN |
| 78  | 2 | 75 | NAN | NAN | NAN |
| 64  | 0 | 79 | NAN | NAN | NAN |
| 63  | 0 | 79 | 185 | 42  | NAN |
| 73  | 0 | 87 | 162 | 71  | NAN |
| 57  | 0 | 86 | 163 | 101 | NAN |
| 76  | 2 | 82 | 223 | 136 | 5,2 |
| 62  | 0 | 89 | 194 | 61  | NAN |
| 58  | 0 | 72 | 218 | 152 | 5,3 |
| 68  | 0 | 75 | NAN | NAN | NAN |
| 61  | 2 | 91 | 150 | 55  | NAN |
| NAN | 2 | 84 | 185 | 143 | NAN |
| 50  | 9 | 77 | 203 | 91  | NAN |
| 67  | 2 | 78 | 157 | 101 | NAN |
| 70  | 2 | 89 | 198 | 86  | NAN |
| 64  | 0 | 76 | 185 | 62  | NAN |
| 62  | 2 | 89 | 119 | 67  | NAN |
| 87  | 0 | 77 | 140 | 113 | NAN |
| 67  | 0 | 75 | 178 | 63  | NAN |
| NAN | 0 | 85 | 182 | 88  | NAN |
| 74  | 0 | 87 | 174 | 46  | NAN |
| 56  | 3 | 83 | 164 | 76  | 5,2 |
| 57  | 1 | 87 | 162 | 101 | NAN |
| 53  | 0 | 86 | 144 | 59  | NAN |
| 79  | 0 | 87 | 148 | 65  | NAN |
| 65  | 0 | 76 | 193 | 133 | NAN |
| 57  | 1 | 80 | 163 | 56  | NAN |
| 75  | 9 | 88 | NAN | NAN | NAN |
| 73  | 2 | 86 | 163 | 64  | NAN |
| 54  | 0 | 80 | 131 | 67  | NAN |
| 53  | 0 | 74 | 150 | 117 | NAN |
| 67  | 0 | 82 | NAN | NAN | NAN |
| 83  | 1 | 74 | NAN | NAN | NAN |
| 47  | 0 | 91 | 153 | 183 | NAN |
| 50  | 0 | 78 | 194 | 91  | NAN |
| 55  | 0 | 88 | 171 | 108 | NAN |
| 54  | 2 | 80 | 155 | 72  | 5,5 |
| 50  | 0 | 75 | 155 | 48  | NAN |
| 60  | 0 | 85 | 154 | 52  | NAN |
| 66  | 3 | 83 | 215 | 228 | NAN |
| 68  | 2 | 89 | NAN | NAN | NAN |
| 67  | 1 | 87 | 166 | 103 | NAN |

|     |   |    |     |     |     |
|-----|---|----|-----|-----|-----|
| 63  | 0 | 71 | 225 | 127 | NAN |
| 58  | 0 | 86 | 160 | 96  | NAN |
| 64  | 3 | 79 | NAN | NAN | NAN |
| 74  | 1 | 80 | 187 | 65  | 5,0 |
| 66  | 0 | 81 | 173 | 61  | NAN |
| 60  | 2 | 75 | NAN | NAN | NAN |
| 74  | 1 | 73 | 136 | 82  | NAN |
| 60  | 1 | 78 | NAN | NAN | NAN |
| 61  | 0 | 87 | 196 | 61  | NAN |
| 73  | 0 | 77 | NAN | NAN | NAN |
| 64  | 0 | 83 | NAN | NAN | NAN |
| 56  | 0 | 86 | 176 | 68  | NAN |
| 55  | 1 | 90 | 205 | 124 | NAN |
| 68  | 1 | 91 | NAN | NAN | NAN |
| 76  | 0 | 78 | 199 | 99  | NAN |
| 68  | 0 | 88 | NAN | NAN | NAN |
| 66  | 0 | 88 | 188 | 109 | NAN |
| 50  | 0 | 77 | 175 | 87  | NAN |
| 67  | 1 | 91 | 147 | 42  | 5,2 |
| 51  | 0 | 88 | NAN | NAN | NAN |
| 58  | 0 | 74 | NAN | NAN | NAN |
| 69  | 0 | 82 | 194 | 77  | 4,6 |
| 75  | 3 | 84 | 172 | 56  | NAN |
| 72  | 1 | 78 | 194 | 76  | NAN |
| 74  | 1 | 73 | NAN | NAN | NAN |
| 65  | 1 | 77 | 156 | 56  | NAN |
| 82  | 0 | 78 | 165 | 69  | NAN |
| NAN | 1 | 67 | NAN | NAN | NAN |
| 52  | 0 | 82 | 152 | 60  | 5,1 |
| 48  | 0 | 80 | NAN | NAN | NAN |
| 69  | 1 | 90 | NAN | NAN | NAN |
| 53  | 3 | 85 | 193 | 54  | NAN |
| 57  | 0 | 86 | 148 | 32  | NAN |
| 69  | 0 | 82 | 191 | 67  | NAN |
| 72  | 0 | 88 | NAN | NAN | NAN |
| 65  | 0 | 85 | 166 | 74  | NAN |
| 69  | 2 | 78 | 161 | 63  | NAN |
| 59  | 0 | 74 | 159 | 92  | NAN |
| 76  | 0 | 88 | 200 | 61  | NAN |
| 56  | 2 | 84 | 164 | 44  | NAN |
| 58  | 0 | 72 | 175 | 162 | NAN |
| 78  | 2 | 88 | 143 | 45  | NAN |
| 69  | 3 | 81 | 132 | 62  | NAN |
| 73  | 1 | 73 | NAN | NAN | NAN |
| 69  | 0 | 89 | 182 | 80  | NAN |
| 74  | 3 | 75 | 175 | 58  | NAN |
| NAN | 0 | 85 | 203 | 58  | NAN |
| 64  | 3 | 79 | 186 | 59  | NAN |
| 65  | 0 | 83 | 170 | 140 | NAN |
| 72  | 1 | 84 | 108 | 71  | NAN |

|    |   |    |     |     |     |
|----|---|----|-----|-----|-----|
| 75 | 0 | 81 | 177 | 124 | 5,4 |
| 77 | 0 | 89 | 203 | 168 | NAN |
| 72 | 1 | 90 | 183 | 108 | NAN |
| 57 | 1 | 88 | 149 | 68  | NAN |
| 74 | 0 | 84 | 275 | 94  | NAN |
| 68 | 1 | 82 | 197 | 48  | NAN |
| 80 | 0 | 91 | 146 | 65  | NAN |
| 60 | 2 | 85 | 185 | 69  | NAN |
| 71 | 0 | 75 | NAN | NAN | NAN |
| 93 | 0 | 89 | 225 | 564 | NAN |
| 50 | 0 | 89 | 129 | 234 | NAN |
| 67 | 0 | 81 | 162 | 93  | NAN |
| 49 | 1 | 74 | 159 | 98  | NAN |
| 51 | 3 | 90 | 175 | 82  | NAN |
| 65 | 1 | 76 | NAN | NAN | NAN |
| 57 | 0 | 91 | 132 | 91  | 5,2 |

| PREG_NUTRITIONSCORE | MEDAS Score 12 gw | PREG_LIFESTYLE_SCORE | PREG_EXERCISE_SCORE |
|---------------------|-------------------|----------------------|---------------------|
| 6,00                | 5,00              | 5,00                 | -1,00               |
| 5,00                | 6,00              | 3,00                 | -2,00               |
| 4,00                | 5,00              | 5,00                 | 1,00                |
| -1,00               | 5,00              | -3,00                | -2,00               |
| -1,00               | 4,00              | -3,00                | -2,00               |
| -3,00               | 4,00              | -5,00                | -2,00               |
| 1,00                | 5,00              | 1,00                 | 0,00                |
| 2,00                | 5,00              | -1,00                | -3,00               |
| 5,00                | 5,00              | 3,00                 | -2,00               |
| -3,00               | 4,00              | -3,00                | 0,00                |
| 3,00                | 9,00              | 1,00                 | -2,00               |
| -1,00               | 4,00              | -3,00                | -2,00               |
| -3,00               | 4,00              | -5,00                | -2,00               |
| -1,00               | 5,00              | -3,00                | -2,00               |
| 1,00                | 6,00              | 0,00                 | -1,00               |
| 2,00                | 6,00              | -1,00                | -3,00               |
| 3,00                | 4,00              | 5,00                 | 2,00                |
| 1,00                | 2,00              | 1,00                 | 0,00                |
| 0,00                | 5,00              | -2,00                | -2,00               |
| 3,00                | 5,00              | 1,00                 | -2,00               |
| -5,00               | 3,00              | -7,00                | -2,00               |
| -3,00               | 2,00              | -2,00                | 1,00                |
| 1,00                | 4,00              | 0,00                 | -1,00               |
| 9,00                | 9,00              | 8,00                 | -1,00               |
| 2,00                | 4,00              | 1,00                 | -1,00               |
| 0,00                | 4,00              | -2,00                | -2,00               |
| 1,00                | 3,00              | -1,00                | -2,00               |
| -2,00               | 6,00              | -5,00                | -3,00               |
| 2,00                | 4,00              | -1,00                | -3,00               |
| -3,00               | 4,00              | -5,00                | -2,00               |
| 4,00                | 6,00              | 4,00                 | 0,00                |
| 6,00                | 7,00              | 5,00                 | -1,00               |
| 1,00                | 4,00              | 1,00                 | 0,00                |
| 2,00                | 5,00              | -1,00                | -3,00               |
| 1,00                | 4,00              | 1,00                 | 0,00                |
| 2,00                | 5,00              | 3,00                 | 1,00                |
| 9,00                | 11,00             | 7,00                 | -2,00               |
| 3,00                | 5,00              | 1,00                 | -2,00               |
| -1,00               | 5,00              | -3,00                | -2,00               |
| -4,00               | 4,00              | -5,00                | -1,00               |
| -5,00               | 3,00              | -8,00                | -3,00               |
| 1,00                | 3,00              | 1,00                 | 0,00                |
| 3,00                | 6,00              | 0,00                 | -3,00               |
| -1,00               | 4,00              | -2,00                | -1,00               |
| 8,00                | 8,00              | 5,00                 | -3,00               |
| -1,00               | 4,00              | -4,00                | -3,00               |
| -6,00               | 2,00              | -8,00                | -2,00               |

|       |      |       |       |
|-------|------|-------|-------|
| -1,00 | 5,00 | -2,00 | -1,00 |
| 0,00  | 4,00 | -2,00 | -2,00 |
| -4,00 | 2,00 | -7,00 | -3,00 |
| 2,00  | 3,00 | 2,00  | 0,00  |
| 5,00  | 9,00 | 2,00  | -3,00 |
| 3,00  | 5,00 | 1,00  | -2,00 |
| -2,00 | 5,00 | -4,00 | -2,00 |
| 4,00  | 7,00 | 1,00  | -3,00 |
| 2,00  | 6,00 | 1,00  | -1,00 |
| -2,00 | 5,00 | -3,00 | -1,00 |
| 4,00  | 5,00 | 3,00  | -1,00 |
| -3,00 | 4,00 | -6,00 | -3,00 |
| -4,00 | 3,00 | -7,00 | -3,00 |
| -2,00 | 5,00 | -3,00 | -1,00 |
| -3,00 | 3,00 | -5,00 | -2,00 |
| -1,00 | 4,00 | -4,00 | -3,00 |
| 5,00  | 7,00 | 3,00  | -2,00 |
| 5,00  | 5,00 | 3,00  | -2,00 |
| 7,00  | 8,00 | 5,00  | -2,00 |
| -1,00 | 5,00 | -1,00 | 0,00  |
| -1,00 | 5,00 | -3,00 | -2,00 |
| 1,00  | 4,00 | -1,00 | -2,00 |
| -3,00 | 2,00 | -5,00 | -2,00 |
| -6,00 | 3,00 | -6,00 | 0,00  |
| 1,00  | 5,00 | -1,00 | -2,00 |
| 1,00  | 6,00 | -1,00 | -2,00 |
| -1,00 | 3,00 | -3,00 | -2,00 |
| 0,00  | 5,00 | -3,00 | -3,00 |
| 5,00  | 5,00 | 4,00  | -1,00 |
| 3,00  | 5,00 | 1,00  | -2,00 |
| 3,00  | 6,00 | 2,00  | -1,00 |
| 2,00  | 5,00 | -1,00 | -3,00 |
| 6,00  | 8,00 | 4,00  | -2,00 |
| -1,00 | 3,00 | -3,00 | -2,00 |
| -5,00 | 2,00 | -6,00 | -1,00 |
| 0,00  | 2,00 | -2,00 | -2,00 |
| 2,00  | 7,00 | 0,00  | -2,00 |
| -6,00 | 3,00 | -8,00 | -2,00 |
| -1,00 | 4,00 | -2,00 | -1,00 |
| -4,00 | 3,00 | -7,00 | -3,00 |
| -1,00 | 4,00 | -4,00 | -3,00 |
| 5,00  | 7,00 | 5,00  | 0,00  |
| 2,00  | 4,00 | -1,00 | -3,00 |
| 1,00  | 5,00 | 1,00  | 0,00  |
| 8,00  | 6,00 | 7,00  | -1,00 |
| -4,00 | 4,00 | -6,00 | -2,00 |
| 1,00  | 6,00 | 0,00  | -1,00 |
| 1,00  | 4,00 | -1,00 | -2,00 |
| -1,00 | 6,00 | -3,00 | -2,00 |
| 3,00  | 6,00 | 1,00  | -2,00 |

|       |       |       |       |
|-------|-------|-------|-------|
| 3,00  | 4,00  | 1,00  | -2,00 |
| 1,00  | 5,00  | 0,00  | -1,00 |
| 7,00  | 8,00  | 4,00  | -3,00 |
| -4,00 | 4,00  | -7,00 | -3,00 |
| 2,00  | 5,00  | 0,00  | -2,00 |
| 1,00  | 4,00  | 0,00  | -1,00 |
| 2,00  | 6,00  | 0,00  | -2,00 |
| 6,00  | 8,00  | 3,00  | -3,00 |
| -6,00 | 1,00  | -9,00 | -3,00 |
| 5,00  | 6,00  | 5,00  | 0,00  |
| 4,00  | 10,00 | 1,00  | -3,00 |
| 2,00  | 4,00  | 0,00  | -2,00 |
| 5,00  | 6,00  | 6,00  | 1,00  |
| 3,00  | 6,00  | 0,00  | -3,00 |
| -3,00 | 3,00  | -6,00 | -3,00 |
| 5,00  | 7,00  | 5,00  | 0,00  |
| 3,00  | 7,00  | 0,00  | -3,00 |
| -2,00 | 4,00  | -5,00 | -3,00 |
| -3,00 | 3,00  | -6,00 | -3,00 |
| 2,00  | 5,00  | -1,00 | -3,00 |
| 4,00  | 5,00  | 2,00  | -2,00 |
| 0,00  | 4,00  | -2,00 | -2,00 |
| 0,00  | 5,00  | -2,00 | -2,00 |
| 3,00  | 7,00  | 3,00  | 0,00  |
| 2,00  | 5,00  | 0,00  | -2,00 |
| 0,00  | 4,00  | -1,00 | -1,00 |
| 3,00  | 6,00  | 1,00  | -2,00 |
| -6,00 | 3,00  | -9,00 | -3,00 |
| -2,00 | 5,00  | -3,00 | -1,00 |
| -1,00 | 7,00  | -1,00 | 0,00  |
| 1,00  | 3,00  | 0,00  | -1,00 |
| 5,00  | 5,00  | 4,00  | -1,00 |
| 5,00  | 5,00  | 2,00  | -3,00 |
| NAN   | 8,00  | NAN   | -2,00 |
| 1,00  | 5,00  | -1,00 | -2,00 |
| 1,00  | 5,00  | -2,00 | -3,00 |
| 2,00  | 5,00  | -1,00 | -3,00 |
| -1,00 | 4,00  | -2,00 | -1,00 |
| 0,00  | 4,00  | -3,00 | -3,00 |
| -4,00 | 2,00  | -6,00 | -2,00 |
| 1,00  | 5,00  | -1,00 | -2,00 |
| -2,00 | 6,00  | -4,00 | -2,00 |
| 6,00  | 7,00  | 5,00  | -1,00 |
| 4,00  | 4,00  | 2,00  | -2,00 |
| 2,00  | 4,00  | 2,00  | 0,00  |
| 2,00  | 4,00  | 1,00  | -1,00 |
| -1,00 | 4,00  | -3,00 | -2,00 |
| -1,00 | 4,00  | -3,00 | -2,00 |
| -3,00 | 3,00  | -5,00 | -2,00 |
| 4,00  | 6,00  | 2,00  | -2,00 |



|       |      |       |       |
|-------|------|-------|-------|
| -4,00 | 4,00 | -6,00 | -2,00 |
| -3,00 | 5,00 | -5,00 | -2,00 |
| 5,00  | 7,00 | 5,00  | 0,00  |
| -1,00 | 5,00 | -4,00 | -3,00 |
| 3,00  | 6,00 | 2,00  | -1,00 |
| -1,00 | 4,00 | -2,00 | -1,00 |
| 2,00  | 7,00 | -1,00 | -3,00 |
| 4,00  | 6,00 | 1,00  | -3,00 |
| -4,00 | 5,00 | -6,00 | -2,00 |
| 2,00  | 4,00 | 0,00  | -2,00 |
| 3,00  | 4,00 | 0,00  | -3,00 |
| -3,00 | 4,00 | -5,00 | -2,00 |
| -4,00 | 2,00 | -6,00 | -2,00 |
| 4,00  | 8,00 | 4,00  | 0,00  |
| -3,00 | 3,00 | -5,00 | -2,00 |
| -6,00 | 4,00 | -8,00 | -2,00 |
| -2,00 | 3,00 | -4,00 | -2,00 |
| -1,00 | 6,00 | -4,00 | -3,00 |
| 2,00  | 3,00 | 0,00  | -2,00 |
| 5,00  | 8,00 | 2,00  | -3,00 |
| 5,00  | 5,00 | 3,00  | -2,00 |
| 2,00  | 7,00 | 0,00  | -2,00 |
| -1,00 | 3,00 | -2,00 | -1,00 |
| 2,00  | 6,00 | 0,00  | -2,00 |
| 3,00  | 6,00 | 1,00  | -2,00 |
| 4,00  | 6,00 | 3,00  | -1,00 |
| 4,00  | 5,00 | 5,00  | 1,00  |
| 4,00  | 6,00 | 3,00  | -1,00 |
| 1,00  | 6,00 | 0,00  | -1,00 |
| 2,00  | 6,00 | 2,00  | 0,00  |
| 6,00  | 8,00 | 7,00  | 1,00  |
| 2,00  | 5,00 | 0,00  | -2,00 |
| 6,00  | 7,00 | 3,00  | -3,00 |
| -5,00 | 3,00 | -8,00 | -3,00 |
| 0,00  | 3,00 | -1,00 | -1,00 |
| 5,00  | 5,00 | 2,00  | -3,00 |
| 2,00  | 5,00 | 0,00  | -2,00 |
| -1,00 | 6,00 | -3,00 | -2,00 |
| -3,00 | 3,00 | -6,00 | -3,00 |
| 1,00  | 3,00 | -2,00 | -3,00 |
| 6,00  | 5,00 | 3,00  | -3,00 |
| 0,00  | 5,00 | -3,00 | -3,00 |
| -3,00 | 4,00 | -4,00 | -1,00 |
| 0,00  | 6,00 | -2,00 | -2,00 |
| -2,00 | 3,00 | -3,00 | -1,00 |
| -3,00 | 5,00 | -6,00 | -3,00 |
| -4,00 | 3,00 | -5,00 | -1,00 |
| 1,00  | 5,00 | 0,00  | -1,00 |
| 2,00  | 4,00 | -1,00 | -3,00 |
| -1,00 | 5,00 | -3,00 | -2,00 |

|       |       |        |       |
|-------|-------|--------|-------|
| 3,00  | 6,00  | 1,00   | -2,00 |
| 0,00  | 4,00  | -1,00  | -1,00 |
| -3,00 | 4,00  | -5,00  | -2,00 |
| 5,00  | 6,00  | 3,00   | -2,00 |
| 4,00  | 6,00  | 2,00   | -2,00 |
| 3,00  | 7,00  | 1,00   | -2,00 |
| 0,00  | 3,00  | -3,00  | -3,00 |
| 0,00  | 5,00  | -3,00  | -3,00 |
| 9,00  | 10,00 | 8,00   | -1,00 |
| 1,00  | 5,00  | 1,00   | 0,00  |
| 4,00  | 6,00  | 2,00   | -2,00 |
| 0,00  | 4,00  | -3,00  | -3,00 |
| -1,00 | 4,00  | -4,00  | -3,00 |
| -6,00 | 2,00  | -9,00  | -3,00 |
| 1,00  | 6,00  | -1,00  | -2,00 |
| -1,00 | 5,00  | -3,00  | -2,00 |
| 5,00  | 7,00  | 3,00   | -2,00 |
| 4,00  | 5,00  | 3,00   | -1,00 |
| -1,00 | 4,00  | -3,00  | -2,00 |
| -5,00 | 4,00  | -7,00  | -2,00 |
| 1,00  | 6,00  | 0,00   | -1,00 |
| -2,00 | 3,00  | -3,00  | -1,00 |
| 2,00  | 5,00  | 0,00   | -2,00 |
| -2,00 | 5,00  | -4,00  | -2,00 |
| -1,00 | 3,00  | -2,00  | -1,00 |
| -1,00 | 5,00  | -1,00  | 0,00  |
| 0,00  | 4,00  | -3,00  | -3,00 |
| -4,00 | 5,00  | -7,00  | -3,00 |
| -2,00 | 4,00  | -3,00  | -1,00 |
| -7,00 | 2,00  | -10,00 | -3,00 |
| 0,00  | 2,00  | -2,00  | -2,00 |
| 1,00  | 6,00  | -1,00  | -2,00 |
| 1,00  | 6,00  | -1,00  | -2,00 |
| -3,00 | 3,00  | -5,00  | -2,00 |
| -1,00 | 5,00  | -4,00  | -3,00 |
| -2,00 | 4,00  | -5,00  | -3,00 |
| -2,00 | 4,00  | -4,00  | -2,00 |
| 0,00  | 6,00  | -1,00  | -1,00 |
| 4,00  | 9,00  | 2,00   | -2,00 |
| -2,00 | 5,00  | -4,00  | -2,00 |
| 7,00  | 7,00  | 5,00   | -2,00 |
| -1,00 | 5,00  | -2,00  | -1,00 |
| 0,00  | 6,00  | -2,00  | -2,00 |
| 3,00  | 5,00  | 1,00   | -2,00 |
| -1,00 | 4,00  | -3,00  | -2,00 |
| 4,00  | 7,00  | 2,00   | -2,00 |
| 1,00  | 5,00  | 0,00   | -1,00 |
| 2,00  | 7,00  | -1,00  | -3,00 |
| 2,00  | 6,00  | 1,00   | -1,00 |
| 2,00  | 6,00  | -1,00  | -3,00 |

|       |       |       |       |
|-------|-------|-------|-------|
| -3,00 | 5,00  | -4,00 | -1,00 |
| -1,00 | 6,00  | -3,00 | -2,00 |
| -4,00 | 4,00  | -6,00 | -2,00 |
| -1,00 | 4,00  | -4,00 | -3,00 |
| -2,00 | 5,00  | -5,00 | -3,00 |
| -1,00 | 5,00  | -4,00 | -3,00 |
| 4,00  | 6,00  | 1,00  | -3,00 |
| -2,00 | 6,00  | -3,00 | -1,00 |
| -5,00 | 4,00  | -6,00 | -1,00 |
| 9,00  | 11,00 | 6,00  | -3,00 |
| -2,00 | 5,00  | -2,00 | 0,00  |
| -2,00 | 4,00  | -4,00 | -2,00 |
| 0,00  | 5,00  | -3,00 | -3,00 |
| 1,00  | 6,00  | -2,00 | -3,00 |
| 0,00  | 5,00  | -2,00 | -2,00 |
| -2,00 | 5,00  | -4,00 | -2,00 |
| -4,00 | 3,00  | -6,00 | -2,00 |
| -1,00 | 4,00  | 0,00  | 1,00  |
| 4,00  | 5,00  | 2,00  | -2,00 |
| 4,00  | 7,00  | 3,00  | -1,00 |
| -2,00 | 6,00  | -5,00 | -3,00 |
| 3,00  | 5,00  | 1,00  | -2,00 |
| -2,00 | 2,00  | -5,00 | -3,00 |
| -1,00 | 3,00  | -3,00 | -2,00 |
| 2,00  | 7,00  | 1,00  | -1,00 |
| 2,00  | 4,00  | -1,00 | -3,00 |
| -5,00 | 3,00  | -7,00 | -2,00 |
| -4,00 | 3,00  | -7,00 | -3,00 |
| 2,00  | 6,00  | -1,00 | -3,00 |
| 2,00  | 6,00  | 0,00  | -2,00 |
| 3,00  | 7,00  | 3,00  | 0,00  |
| 2,00  | 6,00  | 0,00  | -2,00 |
| 3,00  | 8,00  | 2,00  | -1,00 |
| 2,00  | 5,00  | -1,00 | -3,00 |
| 1,00  | 4,00  | -2,00 | -3,00 |
| 1,00  | 9,00  | -1,00 | -2,00 |
| -3,00 | NAN   | -5,00 | -2,00 |
| 6,00  | 9,00  | 5,00  | -1,00 |
| 0,00  | 6,00  | -2,00 | -2,00 |
| 7,00  | 7,00  | 4,00  | -3,00 |
| 4,00  | 7,00  | 2,00  | -2,00 |
| 1,00  | 4,00  | -2,00 | -3,00 |
| 0,00  | 4,00  | -1,00 | -1,00 |
| 0,00  | 5,00  | -2,00 | -2,00 |
| 4,00  | 6,00  | 1,00  | -3,00 |
| 3,00  | 7,00  | 1,00  | -2,00 |
| -1,00 | 7,00  | -3,00 | -2,00 |
| -2,00 | 4,00  | -5,00 | -3,00 |
| -1,00 | 6,00  | -1,00 | 0,00  |
| -4,00 | 5,00  | -6,00 | -2,00 |

|       |      |       |       |
|-------|------|-------|-------|
| 1,00  | 6,00 | -2,00 | -3,00 |
| 2,00  | 6,00 | 0,00  | -2,00 |
| 5,00  | 8,00 | 2,00  | -3,00 |
| 2,00  | 8,00 | 1,00  | -1,00 |
| 1,00  | 6,00 | 1,00  | 0,00  |
| 1,00  | 4,00 | -2,00 | -3,00 |
| 3,00  | 6,00 | 1,00  | -2,00 |
| -2,00 | 3,00 | -5,00 | -3,00 |
| -4,00 | 4,00 | -7,00 | -3,00 |
| 2,00  | 4,00 | 2,00  | 0,00  |
| 1,00  | 6,00 | -2,00 | -3,00 |
| 6,00  | NAN  | 3,00  | -3,00 |
| 3,00  | NAN  | 1,00  | -2,00 |
| 2,00  | 6,00 | -1,00 | -3,00 |
| -2,00 | 3,00 | -3,00 | -1,00 |
| 7,00  | 9,00 | 4,00  | -3,00 |

| SG24_NUTRITION_SCORE | SG24_LIFESTYLE_SCORE | SG24_MEDDIET_SCORE |
|----------------------|----------------------|--------------------|
| 5,00                 | 5,00                 | 6,00               |
| 0,00                 | -2,00                | 3,00               |
| 3,00                 | 3,00                 | 4,00               |
| -1,00                | -4,00                | 5,00               |
| -3,00                | -6,00                | 3,00               |
| -3,00                | -5,00                | 3,00               |
| 0,00                 | -1,00                | 3,00               |
| 5,00                 | 2,00                 | 4,00               |
| 4,00                 | 2,00                 | 4,00               |
| -1,00                | -2,00                | 5,00               |
| 8,00                 | 5,00                 | 10,00              |
| 4,00                 | 1,00                 | 6,00               |
| 0,00                 | -3,00                | 4,00               |
| 3,00                 | 1,00                 | 3,00               |
| 2,00                 | 1,00                 | 6,00               |
| 1,00                 | -2,00                | 4,00               |
| 5,00                 | 3,00                 | 6,00               |
| 3,00                 | 1,00                 | 3,00               |
| -1,00                | -3,00                | 2,00               |
| 3,00                 | 1,00                 | 6,00               |
| 1,00                 | 0,00                 | 5,00               |
| -4,00                | -5,00                | 1,00               |
| NAN                  | NAN                  | NAN                |
| 11,00                | 8,00                 | 8,00               |
| 1,00                 | -1,00                | 4,00               |
| 0,00                 | -2,00                | 4,00               |
| -3,00                | -4,00                | 4,00               |
| -3,00                | -5,00                | 4,00               |
| -1,00                | -4,00                | 4,00               |
| -1,00                | -4,00                | 5,00               |
| 3,00                 | 2,00                 | 6,00               |
| 8,00                 | 8,00                 | 7,00               |
| 2,00                 | -1,00                | 5,00               |
| 2,00                 | 1,00                 | 6,00               |
| 0,00                 | -2,00                | 3,00               |
| 8,00                 | 6,00                 | 6,00               |
| 11,00                | 10,00                | 10,00              |
| 4,00                 | 3,00                 | 5,00               |
| 3,00                 | 2,00                 | 3,00               |
| 3,00                 | 2,00                 | 5,00               |
| -2,00                | -4,00                | 2,00               |
| -1,00                | -3,00                | 5,00               |
| -2,00                | -5,00                | 4,00               |
| -2,00                | -2,00                | 4,00               |
| 10,00                | 7,00                 | 8,00               |
| -2,00                | -4,00                | 3,00               |
| 0,00                 | 1,00                 | 6,00               |

|       |       |      |
|-------|-------|------|
| -2,00 | -2,00 | 4,00 |
| 0,00  | 0,00  | 3,00 |
| -3,00 | -5,00 | 2,00 |
| 5,00  | 3,00  | 4,00 |
| 5,00  | 5,00  | 5,00 |
| -1,00 | -3,00 | 3,00 |
| 2,00  | 0,00  | 3,00 |
| 7,00  | 5,00  | 5,00 |
| 0,00  | -1,00 | 4,00 |
| 1,00  | 0,00  | 6,00 |
| 6,00  | 5,00  | 7,00 |
| 0,00  | -2,00 | 4,00 |
| -3,00 | -5,00 | 3,00 |
| -2,00 | -4,00 | 6,00 |
| 2,00  | 0,00  | 4,00 |
| 7,00  | 4,00  | 7,00 |
| 3,00  | 1,00  | 5,00 |
| 3,00  | 1,00  | 3,00 |
| 4,00  | 2,00  | 6,00 |
| -2,00 | -1,00 | 5,00 |
| 0,00  | -1,00 | 6,00 |
| 1,00  | -1,00 | 5,00 |
| -1,00 | -1,00 | 2,00 |
| -4,00 | -6,00 | 2,00 |
| 1,00  | 1,00  | 5,00 |
| 1,00  | -1,00 | 3,00 |
| 5,00  | 4,00  | 5,00 |
| 2,00  | 0,00  | 8,00 |
| 1,00  | 2,00  | 4,00 |
| -1,00 | -3,00 | 4,00 |
| 6,00  | 5,00  | 6,00 |
| -3,00 | -4,00 | 5,00 |
| 6,00  | 5,00  | 4,00 |
| -3,00 | -5,00 | 2,00 |
| -1,00 | -2,00 | 6,00 |
| -1,00 | -4,00 | 2,00 |
| 4,00  | 2,00  | 7,00 |
| -6,00 | -7,00 | 2,00 |
| 1,00  | 0,00  | 4,00 |
| -3,00 | -6,00 | 5,00 |
| -3,00 | -6,00 | 2,00 |
| 6,00  | 4,00  | 5,00 |
| -4,00 | -6,00 | 2,00 |
| 0,00  | -1,00 | 7,00 |
| 7,00  | 6,00  | 6,00 |
| -3,00 | -5,00 | 2,00 |
| 0,00  | -3,00 | 5,00 |
| 5,00  | 2,00  | 6,00 |
| 3,00  | 0,00  | 7,00 |
| 2,00  | 0,00  | 4,00 |

|       |       |       |
|-------|-------|-------|
| 5,00  | 3,00  | 6,00  |
| 3,00  | 2,00  | 5,00  |
| 3,00  | 1,00  | 6,00  |
| -7,00 | -8,00 | 2,00  |
| -2,00 | -4,00 | 4,00  |
| -1,00 | -2,00 | 5,00  |
| 3,00  | 2,00  | 5,00  |
| 5,00  | 2,00  | 5,00  |
| -1,00 | -3,00 | 2,00  |
| 2,00  | -1,00 | 4,00  |
| -1,00 | -4,00 | 6,00  |
| 0,00  | -1,00 | 5,00  |
| 8,00  | 7,00  | 6,00  |
| 1,00  | -2,00 | 7,00  |
| -3,00 | -6,00 | 3,00  |
| 1,00  | 0,00  | 6,00  |
| 4,00  | 1,00  | 8,00  |
| 1,00  | -1,00 | 5,00  |
| 0,00  | -1,00 | 4,00  |
| 2,00  | -1,00 | 4,00  |
| 7,00  | 5,00  | 5,00  |
| -3,00 | -6,00 | 4,00  |
| 2,00  | 0,00  | 5,00  |
| 3,00  | 1,00  | 9,00  |
| 5,00  | 3,00  | 7,00  |
| 1,00  | -2,00 | 4,00  |
| 3,00  | 1,00  | 4,00  |
| 1,00  | -2,00 | 6,00  |
| 5,00  | 4,00  | 8,00  |
| 11,00 | 10,00 | 10,00 |
| 7,00  | 5,00  | 6,00  |
| 4,00  | 4,00  | 6,00  |
| 9,00  | 7,00  | 7,00  |
| 3,00  | 1,00  | 5,00  |
| 2,00  | -1,00 | 5,00  |
| 6,00  | 3,00  | 7,00  |
| 2,00  | 0,00  | 7,00  |
| 4,00  | 2,00  | 6,00  |
| -1,00 | -4,00 | 5,00  |
| 4,00  | 1,00  | 3,00  |
| 7,00  | 5,00  | 9,00  |
| 5,00  | 3,00  | 7,00  |
| 7,00  | 6,00  | 8,00  |
| 4,00  | 2,00  | 5,00  |
| 4,00  | 2,00  | 6,00  |
| 5,00  | 3,00  | 4,00  |
| 7,00  | 6,00  | 6,00  |
| 2,00  | 0,00  | 4,00  |
| 4,00  | 4,00  | 8,00  |
| 7,00  | 6,00  | 7,00  |

|       |       |       |
|-------|-------|-------|
| 2,00  | 1,00  | 7,00  |
| 1,00  | -1,00 | 8,00  |
| 7,00  | 8,00  | 6,00  |
| 0,00  | -3,00 | 3,00  |
| 9,00  | 6,00  | 10,00 |
| 2,00  | -1,00 | 4,00  |
| 8,00  | 7,00  | 8,00  |
| 9,00  | 8,00  | 8,00  |
| 4,00  | 2,00  | 6,00  |
| 11,00 | 11,00 | 10,00 |
| 6,00  | 3,00  | 6,00  |
| 0,00  | -2,00 | 5,00  |
| 5,00  | 3,00  | NAN   |
| 5,00  | 2,00  | 8,00  |
| -1,00 | -2,00 | 6,00  |
| 1,00  | -1,00 | 6,00  |
| 3,00  | 1,00  | 5,00  |
| 3,00  | 0,00  | 7,00  |
| 5,00  | 5,00  | 5,00  |
| 8,00  | 5,00  | 11,00 |
| 3,00  | 2,00  | 6,00  |
| 8,00  | 7,00  | 8,00  |
| 5,00  | 2,00  | 6,00  |
| 5,00  | 2,00  | 6,00  |
| 3,00  | 1,00  | 7,00  |
| 8,00  | 8,00  | 7,00  |
| 11,00 | 10,00 | 11,00 |
| 8,00  | 7,00  | 9,00  |
| 0,00  | -1,00 | 4,00  |
| 5,00  | 3,00  | 7,00  |
| 8,00  | 7,00  | 7,00  |
| 7,00  | 4,00  | 7,00  |
| 7,00  | 5,00  | 8,00  |
| -3,00 | -5,00 | 4,00  |
| 8,00  | 6,00  | 8,00  |
| 5,00  | 2,00  | 8,00  |
| 4,00  | 2,00  | 4,00  |
| 2,00  | 1,00  | 8,00  |
| 4,00  | 1,00  | 6,00  |
| 4,00  | 1,00  | 5,00  |
| 9,00  | 7,00  | 8,00  |
| 4,00  | 2,00  | 5,00  |
| 6,00  | 4,00  | 7,00  |
| 3,00  | 1,00  | 9,00  |
| -2,00 | -4,00 | 3,00  |
| 12,00 | 9,00  | 11,00 |
| 0,00  | -2,00 | 4,00  |
| 2,00  | 0,00  | 4,00  |
| 2,00  | 0,00  | 5,00  |
| 2,00  | -1,00 | 4,00  |



|       |       |       |
|-------|-------|-------|
| 5,00  | 3,00  | 6,00  |
| 2,00  | 0,00  | 3,00  |
| 6,00  | 4,00  | 9,00  |
| 0,00  | -2,00 | 7,00  |
| 8,00  | 9,00  | 5,00  |
| 4,00  | 2,00  | 7,00  |
| 4,00  | 1,00  | 5,00  |
| -2,00 | -5,00 | 2,00  |
| 10,00 | 9,00  | 8,00  |
| 7,00  | 6,00  | 7,00  |
| 6,00  | 5,00  | 6,00  |
| 3,00  | 0,00  | 4,00  |
| 4,00  | 1,00  | 6,00  |
| 7,00  | 4,00  | 8,00  |
| 6,00  | 4,00  | 7,00  |
| 10,00 | 9,00  | 9,00  |
| 5,00  | 4,00  | 7,00  |
| 6,00  | 5,00  | 7,00  |
| 7,00  | 6,00  | 6,00  |
| 3,00  | 2,00  | 6,00  |
| 5,00  | 3,00  | 8,00  |
| 1,00  | -2,00 | 6,00  |
| 4,00  | 2,00  | 6,00  |
| 0,00  | -3,00 | 6,00  |
| 9,00  | 7,00  | 10,00 |
| -1,00 | -1,00 | 6,00  |
| 7,00  | 5,00  | 7,00  |
| 1,00  | 0,00  | 6,00  |
| 6,00  | 4,00  | 6,00  |
| 1,00  | -1,00 | 5,00  |
| 1,00  | 0,00  | 6,00  |
| 1,00  | 0,00  | 5,00  |
| 8,00  | 6,00  | 6,00  |
| 2,00  | 0,00  | 6,00  |
| 7,00  | 4,00  | 7,00  |
| 4,00  | 1,00  | 6,00  |
| 6,00  | 4,00  | 9,00  |
| 1,00  | -2,00 | 4,00  |
| 6,00  | 3,00  | 8,00  |
| 4,00  | 3,00  | 6,00  |
| 8,00  | 6,00  | 6,00  |
| 4,00  | 3,00  | 6,00  |
| -1,00 | -4,00 | 4,00  |
| 7,00  | 4,00  | 9,00  |
| 5,00  | 3,00  | 6,00  |
| 5,00  | 3,00  | 7,00  |
| 9,00  | 8,00  | 9,00  |
| 7,00  | 6,00  | 8,00  |
| 5,00  | 3,00  | 7,00  |
| 4,00  | 2,00  | 7,00  |

|       |       |       |
|-------|-------|-------|
| 5,00  | 3,00  | 9,00  |
| 6,00  | 4,00  | 8,00  |
| 3,00  | 1,00  | 5,00  |
| 2,00  | -1,00 | 3,00  |
| 4,00  | 2,00  | 6,00  |
| 1,00  | -2,00 | 4,00  |
| 3,00  | 1,00  | 6,00  |
| 2,00  | 0,00  | 7,00  |
| -2,00 | -3,00 | 3,00  |
| 10,00 | 8,00  | 11,00 |
| NAN   | NAN   | NAN   |
| 3,00  | 1,00  | 5,00  |
| 1,00  | -1,00 | 5,00  |
| 6,00  | 4,00  | 8,00  |
| 5,00  | 3,00  | 7,00  |
| 4,00  | 2,00  | 8,00  |
| 5,00  | 4,00  | 5,00  |
| -1,00 | -2,00 | 4,00  |
| 9,00  | 9,00  | 7,00  |
| 4,00  | 1,00  | 5,00  |
| 5,00  | 3,00  | 7,00  |
| 3,00  | 2,00  | 6,00  |
| -2,00 | -4,00 | 4,00  |
| 0,00  | -3,00 | 7,00  |
| 6,00  | 4,00  | 9,00  |
| 6,00  | 3,00  | 7,00  |
| 2,00  | 0,00  | 4,00  |
| -2,00 | -4,00 | 6,00  |
| 10,00 | 8,00  | 8,00  |
| 8,00  | 6,00  | 10,00 |
| 4,00  | 2,00  | 7,00  |
| 5,00  | 3,00  | 7,00  |
| 2,00  | 2,00  | 9,00  |
| 5,00  | 2,00  | 7,00  |
| 4,00  | 2,00  | 6,00  |
| -2,00 | -5,00 | 4,00  |
| 2,00  | 0,00  | 4,00  |
| 8,00  | 6,00  | 10,00 |
| 5,00  | 4,00  | 8,00  |
| 4,00  | 1,00  | 7,00  |
| NAN   | NAN   | NAN   |
| 2,00  | 1,00  | 5,00  |
| -2,00 | -4,00 | 4,00  |
| 0,00  | -2,00 | 7,00  |
| 5,00  | 2,00  | 8,00  |
| 8,00  | 6,00  | 8,00  |
| 9,00  | 8,00  | 8,00  |
| 7,00  | 4,00  | 6,00  |
| 8,00  | 7,00  | 9,00  |
| -6,00 | -7,00 | 4,00  |

|      |       |      |
|------|-------|------|
| 6,00 | 4,00  | 7,00 |
| 6,00 | 3,00  | 7,00 |
| 7,00 | 5,00  | 8,00 |
| 7,00 | 5,00  | 9,00 |
| 4,00 | 3,00  | 4,00 |
| 9,00 | 9,00  | 7,00 |
| 1,00 | -2,00 | 5,00 |
| 4,00 | 1,00  | 6,00 |
| 1,00 | -1,00 | NAN  |
| 1,00 | 0,00  | 5,00 |
| 3,00 | 2,00  | 7,00 |
| 5,00 | 4,00  | NAN  |
| 5,00 | 3,00  | NAN  |
| 4,00 | 1,00  | 7,00 |
| 1,00 | -2,00 | 4,00 |
| 5,00 | 2,00  | 9,00 |

| MEDAS_SCORE_SG24 | SG24_EXERCISE_SCORE | NutritionScore_2años | EXERCISEScore_2años |
|------------------|---------------------|----------------------|---------------------|
| 7,00             | 0,00                | 3,00                 | 0,00                |
| 3,00             | -2,00               | 1,00                 | -2,00               |
| 5,00             | 0,00                | 0,00                 | -2,00               |
| 7,00             | -3,00               | 1,00                 | -3,00               |
| 4,00             | -3,00               | -1,00                | -3,00               |
| 3,00             | -2,00               | NAN                  | -2,00               |
| 5,00             | -1,00               | 4,00                 | -2,00               |
| 6,00             | -3,00               | 8,00                 | -2,00               |
| 6,00             | -2,00               | 7,00                 | -3,00               |
| 7,00             | -1,00               | -2,00                | -2,00               |
| 10,00            | -3,00               | 0,00                 | -2,00               |
| 8,00             | -3,00               | 4,00                 | -3,00               |
| 7,00             | -3,00               | 7,00                 | -3,00               |
| 4,00             | -2,00               | -2,00                | -1,00               |
| 6,00             | -1,00               | 3,00                 | 1,00                |
| 5,00             | -3,00               | 4,00                 | -2,00               |
| 6,00             | -2,00               | 6,00                 | 1,00                |
| 6,00             | -2,00               | 2,00                 | -2,00               |
| 4,00             | -2,00               | 0,00                 | -1,00               |
| 6,00             | -2,00               | 4,00                 | -2,00               |
| 6,00             | -1,00               | 0,00                 | -2,00               |
| 4,00             | -1,00               | -3,00                | 0,00                |
| NAN              | NAN                 | 0,00                 | -1,00               |
| 8,00             | -3,00               | 9,00                 | -1,00               |
| 4,00             | -2,00               | 3,00                 | -2,00               |
| 4,00             | -2,00               | 1,00                 | -2,00               |
| 4,00             | -1,00               | -2,00                | -1,00               |
| 4,00             | -2,00               | -2,00                | -2,00               |
| 6,00             | -3,00               | 3,00                 | -2,00               |
| 5,00             | -3,00               | -2,00                | -3,00               |
| 6,00             | -1,00               | 2,00                 | 0,00                |
| 7,00             | 0,00                | 6,00                 | -2,00               |
| 7,00             | -3,00               | 0,00                 | -2,00               |
| 7,00             | -1,00               | 3,00                 | -3,00               |
| 4,00             | -2,00               | 0,00                 | -2,00               |
| 7,00             | -2,00               | 1,00                 | -1,00               |
| 10,00            | -1,00               | 6,00                 | -2,00               |
| 6,00             | -1,00               | 1,00                 | -1,00               |
| 6,00             | -1,00               | 5,00                 | -2,00               |
| 6,00             | -1,00               | 0,00                 | -2,00               |
| 3,00             | -2,00               | 1,00                 | -3,00               |
| 5,00             | -2,00               | 4,00                 | -2,00               |
| 6,00             | -3,00               | 2,00                 | -2,00               |
| 6,00             | 0,00                | 0,00                 | 0,00                |
| 8,00             | -3,00               | 10,00                | -3,00               |
| 3,00             | -2,00               | 2,00                 | -3,00               |
| 7,00             | 1,00                | -2,00                | -1,00               |

|      |       |       |       |
|------|-------|-------|-------|
| 6,00 | 0,00  | -1,00 | -2,00 |
| 6,00 | 0,00  | 5,00  | -3,00 |
| 3,00 | -2,00 | NAN   | -2,00 |
| 5,00 | -2,00 | 4,00  | 1,00  |
| 6,00 | 0,00  | NAN   | -2,00 |
| 5,00 | -2,00 | 1,00  | -1,00 |
| 5,00 | -2,00 | -3,00 | -1,00 |
| 5,00 | -2,00 | 6,00  | -2,00 |
| 4,00 | -1,00 | -1,00 | -3,00 |
| 8,00 | -1,00 | 1,00  | -1,00 |
| 8,00 | -1,00 | 4,00  | -3,00 |
| 6,00 | -2,00 | -1,00 | -3,00 |
| 5,00 | -2,00 | -1,00 | -1,00 |
| 7,00 | -2,00 | 0,00  | 0,00  |
| 6,00 | -2,00 | 0,00  | -2,00 |
| 8,00 | -3,00 | 3,00  | -2,00 |
| 5,00 | -2,00 | 5,00  | -2,00 |
| 5,00 | -2,00 | 6,00  | -2,00 |
| 7,00 | -2,00 | 7,00  | -2,00 |
| 6,00 | 1,00  | -2,00 | -2,00 |
| 6,00 | -1,00 | -3,00 | -1,00 |
| 6,00 | -2,00 | 6,00  | -1,00 |
| 4,00 | 0,00  | 3,00  | -2,00 |
| 5,00 | -2,00 | 0,00  | -1,00 |
| 5,00 | 0,00  | 2,00  | 0,00  |
| 5,00 | -2,00 | 0,00  | -1,00 |
| 7,00 | -1,00 | NAN   | NAN   |
| 9,00 | -2,00 | NAN   | NAN   |
| 6,00 | 1,00  | 6,00  | -1,00 |
| 7,00 | -2,00 | 2,00  | -2,00 |
| 8,00 | -1,00 | 2,00  | -1,00 |
| 6,00 | -1,00 | -4,00 | -1,00 |
| 7,00 | -1,00 | 4,00  | 0,00  |
| 3,00 | -2,00 | 1,00  | -2,00 |
| 7,00 | -1,00 | 6,00  | -2,00 |
| 5,00 | -3,00 | -2,00 | -2,00 |
| 8,00 | -2,00 | 7,00  | -3,00 |
| 2,00 | -1,00 | 0,00  | -2,00 |
| 6,00 | -1,00 | -1,00 | -1,00 |
| 7,00 | -3,00 | -2,00 | -1,00 |
| 4,00 | -3,00 | 1,00  | -3,00 |
| 6,00 | -2,00 | 3,00  | -2,00 |
| 2,00 | -2,00 | -3,00 | -2,00 |
| 7,00 | -1,00 | -1,00 | -3,00 |
| 7,00 | -1,00 | 5,00  | -1,00 |
| 4,00 | -2,00 | NAN   | NAN   |
| 8,00 | -3,00 | 0,00  | -3,00 |
| 7,00 | -3,00 | 1,00  | -1,00 |
| 8,00 | -3,00 | 2,00  | -2,00 |
| 6,00 | -2,00 | 6,00  | -1,00 |

|       |       |       |       |
|-------|-------|-------|-------|
| 8,00  | -2,00 | 2,00  | -2,00 |
| 6,00  | -1,00 | 1,00  | -1,00 |
| 6,00  | -2,00 | 3,00  | 0,00  |
| 3,00  | -1,00 | -3,00 | 0,00  |
| 6,00  | -2,00 | 0,00  | -1,00 |
| 6,00  | -1,00 | -5,00 | -1,00 |
| 7,00  | -1,00 | NAN   | NAN   |
| 8,00  | -3,00 | 7,00  | -3,00 |
| 5,00  | -2,00 | -4,00 | -2,00 |
| 4,00  | -3,00 | 0,00  | -1,00 |
| 7,00  | -3,00 | 0,00  | -1,00 |
| 8,00  | -1,00 | 1,00  | -1,00 |
| 7,00  | -1,00 | 6,00  | -1,00 |
| 7,00  | -3,00 | 4,00  | -3,00 |
| 5,00  | -3,00 | 0,00  | -2,00 |
| 8,00  | -1,00 | -1,00 | -1,00 |
| 8,00  | -3,00 | 7,00  | -2,00 |
| 7,00  | -2,00 | -3,00 | -1,00 |
| 5,00  | -1,00 | -3,00 | -2,00 |
| 5,00  | -3,00 | 3,00  | -1,00 |
| 6,00  | -2,00 | 3,00  | -2,00 |
| 6,00  | -3,00 | 2,00  | -2,00 |
| 8,00  | -2,00 | 2,00  | 1,00  |
| 10,00 | -2,00 | 2,00  | -3,00 |
| 9,00  | -2,00 | 1,00  | -2,00 |
| 6,00  | -3,00 | 4,00  | -2,00 |
| 6,00  | -2,00 | 2,00  | -1,00 |
| 7,00  | -3,00 | 1,00  | -3,00 |
| 9,00  | -1,00 | 2,00  | -1,00 |
| 10,00 | -1,00 | 4,00  | -1,00 |
| 6,00  | -2,00 | 0,00  | -2,00 |
| 7,00  | 0,00  | 1,00  | -3,00 |
| 8,00  | -2,00 | 2,00  | -2,00 |
| 5,00  | -2,00 | 4,00  | -2,00 |
| 6,00  | -3,00 | 0,00  | -2,00 |
| 7,00  | -3,00 | 3,00  | -1,00 |
| 8,00  | -2,00 | 3,00  | -1,00 |
| 8,00  | -2,00 | 5,00  | -1,00 |
| 6,00  | -3,00 | 0,00  | -3,00 |
| 5,00  | -3,00 | -4,00 | -2,00 |
| 10,00 | -2,00 | 5,00  | -3,00 |
| 7,00  | -2,00 | 0,00  | -2,00 |
| 9,00  | -1,00 | 7,00  | -2,00 |
| 5,00  | -2,00 | 2,00  | -1,00 |
| 7,00  | -2,00 | 1,00  | -3,00 |
| 6,00  | -2,00 | 3,00  | -3,00 |
| 7,00  | -1,00 | 1,00  | -1,00 |
| 6,00  | -2,00 | -1,00 | -1,00 |
| 9,00  | 0,00  | 4,00  | -2,00 |
| 7,00  | -1,00 | 4,00  | -3,00 |

|       |       |       |       |
|-------|-------|-------|-------|
| 8,00  | -1,00 | 0,00  | -1,00 |
| 8,00  | -2,00 | -2,00 | -1,00 |
| 9,00  | 1,00  | 10,00 | -1,00 |
| 5,00  | -3,00 | 0,00  | -2,00 |
| 10,00 | -3,00 | 2,00  | -2,00 |
| 4,00  | -3,00 | 6,00  | -1,00 |
| 8,00  | -1,00 | 2,00  | -2,00 |
| 8,00  | -1,00 | NAN   | NAN   |
| 6,00  | -2,00 | -3,00 | -2,00 |
| 10,00 | 0,00  | 3,00  | 0,00  |
| 7,00  | -3,00 | NAN   | NAN   |
| 5,00  | -2,00 | 1,00  | -3,00 |
| NAN   | -2,00 | 2,00  | -2,00 |
| 7,00  | -3,00 | 0,00  | -1,00 |
| 8,00  | -1,00 | -7,00 | -1,00 |
| 8,00  | -2,00 | -1,00 | -2,00 |
| 7,00  | -2,00 | 1,00  | -2,00 |
| 7,00  | -3,00 | -2,00 | -3,00 |
| 7,00  | 0,00  | 3,00  | -1,00 |
| 11,00 | -3,00 | 7,00  | -3,00 |
| 8,00  | -1,00 | 5,00  | -1,00 |
| 9,00  | -1,00 | 4,00  | -2,00 |
| 9,00  | -3,00 | NAN   | NAN   |
| 6,00  | -3,00 | 0,00  | -3,00 |
| 7,00  | -2,00 | -1,00 | 0,00  |
| 8,00  | 0,00  | 6,00  | -1,00 |
| 12,00 | -1,00 | 9,00  | -2,00 |
| 10,00 | -1,00 | 5,00  | -1,00 |
| 7,00  | -1,00 | 0,00  | -2,00 |
| 8,00  | -2,00 | 4,00  | 0,00  |
| 9,00  | -1,00 | 7,00  | 0,00  |
| 8,00  | -3,00 | 5,00  | 0,00  |
| 8,00  | -2,00 | 7,00  | -2,00 |
| 6,00  | -2,00 | 0,00  | -3,00 |
| 10,00 | -2,00 | 6,00  | -1,00 |
| 9,00  | -3,00 | 6,00  | -2,00 |
| 4,00  | -2,00 | 3,00  | -2,00 |
| 8,00  | -1,00 | 2,00  | 0,00  |
| 7,00  | -3,00 | 3,00  | -3,00 |
| 6,00  | -3,00 | 5,00  | -2,00 |
| 9,00  | -2,00 | 7,00  | -2,00 |
| 7,00  | -2,00 | -2,00 | -3,00 |
| 7,00  | -2,00 | -4,00 | -2,00 |
| 9,00  | -2,00 | 8,00  | -1,00 |
| 5,00  | -2,00 | 4,00  | -2,00 |
| 11,00 | -3,00 | 5,00  | -2,00 |
| 6,00  | -2,00 | -5,00 | 0,00  |
| 4,00  | -2,00 | 0,00  | -2,00 |
| 7,00  | -2,00 | -1,00 | -2,00 |
| 4,00  | -3,00 | 4,00  | -3,00 |

|       |       |       |       |
|-------|-------|-------|-------|
| 7,00  | -2,00 | 8,00  | -1,00 |
| 6,00  | -2,00 | 1,00  | -1,00 |
| 9,00  | -2,00 | 0,00  | -3,00 |
| 7,00  | -2,00 | 2,00  | -1,00 |
| 7,00  | 1,00  | 7,00  | -3,00 |
| 7,00  | -2,00 | 5,00  | -1,00 |
| 5,00  | -3,00 | 4,00  | -2,00 |
| 4,00  | -3,00 | -1,00 | -2,00 |
| 9,00  | -1,00 | 8,00  | -1,00 |
| 7,00  | -1,00 | 4,00  | -2,00 |
| 6,00  | -1,00 | 5,00  | -3,00 |
| 5,00  | -3,00 | 5,00  | -1,00 |
| 7,00  | -3,00 | 3,00  | -3,00 |
| 10,00 | -3,00 | NAN   | NAN   |
| 7,00  | -2,00 | 3,00  | -3,00 |
| 10,00 | -1,00 | 1,00  | -1,00 |
| 8,00  | -1,00 | 2,00  | -2,00 |
| 8,00  | -1,00 | 3,00  | -1,00 |
| 7,00  | -1,00 | 4,00  | -2,00 |
| 7,00  | -1,00 | 2,00  | 0,00  |
| 8,00  | -2,00 | -1,00 | -1,00 |
| 7,00  | -3,00 | 5,00  | -2,00 |
| 7,00  | -2,00 | 0,00  | -2,00 |
| 6,00  | -3,00 | -4,00 | -2,00 |
| 10,00 | -2,00 | 4,00  | -1,00 |
| 8,00  | 0,00  | 1,00  | -1,00 |
| 8,00  | -2,00 | 1,00  | -3,00 |
| 8,00  | -1,00 | -2,00 | -3,00 |
| 7,00  | -2,00 | 11,00 | -2,00 |
| 7,00  | -2,00 | NAN   | NAN   |
| 7,00  | -1,00 | 3,00  | -1,00 |
| 6,00  | -1,00 | 4,00  | -2,00 |
| 9,00  | -2,00 | 5,00  | -1,00 |
| 8,00  | -2,00 | 1,00  | -3,00 |
| 8,00  | -3,00 | 2,00  | -2,00 |
| 7,00  | -3,00 | -2,00 | -3,00 |
| 9,00  | -2,00 | 0,00  | -1,00 |
| 6,00  | -3,00 | -2,00 | -2,00 |
| 9,00  | -3,00 | 3,00  | -3,00 |
| 6,00  | -1,00 | -1,00 | 0,00  |
| 8,00  | -2,00 | 8,00  | -2,00 |
| 9,00  | -1,00 | 6,00  | 0,00  |
| 4,00  | -3,00 | -2,00 | 1,00  |
| 9,00  | -3,00 | 6,00  | -3,00 |
| 7,00  | -2,00 | 8,00  | -3,00 |
| 7,00  | -2,00 | NAN   | NAN   |
| 10,00 | -1,00 | 9,00  | -1,00 |
| 9,00  | -1,00 | -1,00 | -3,00 |
| 7,00  | -2,00 | 8,00  | -1,00 |
| 8,00  | -2,00 | 6,00  | -2,00 |



|       |       |       |       |
|-------|-------|-------|-------|
| 9,00  | -2,00 | 1,00  | -1,00 |
| 8,00  | -2,00 | 2,00  | -1,00 |
| 7,00  | -2,00 | -1,00 | -2,00 |
| 5,00  | -3,00 | 5,00  | -2,00 |
| 7,00  | -2,00 | 4,00  | -1,00 |
| 6,00  | -3,00 | 5,00  | -2,00 |
| 7,00  | -2,00 | 5,00  | -2,00 |
| 9,00  | -2,00 | 6,00  | 0,00  |
| 3,00  | -1,00 | 0,00  | -1,00 |
| 11,00 | -2,00 | 10,00 | -3,00 |
| NAN   | NAN   | 4,00  | -1,00 |
| 7,00  | -2,00 | 1,00  | -2,00 |
| 7,00  | -2,00 | 6,00  | -3,00 |
| 8,00  | -2,00 | 3,00  | -2,00 |
| 7,00  | -2,00 | 3,00  | 0,00  |
| 7,00  | -2,00 | 2,00  | -1,00 |
| 5,00  | -1,00 | -1,00 | -1,00 |
| 5,00  | -1,00 | 0,00  | -1,00 |
| 10,00 | 0,00  | 4,00  | -1,00 |
| 6,00  | -3,00 | 3,00  | -2,00 |
| 8,00  | -2,00 | 3,00  | -2,00 |
| 7,00  | -1,00 | 3,00  | -1,00 |
| 5,00  | -2,00 | 1,00  | -3,00 |
| 8,00  | -3,00 | 0,00  | -1,00 |
| 10,00 | -2,00 | 8,00  | -2,00 |
| 7,00  | -3,00 | NAN   | NAN   |
| 7,00  | -2,00 | NAN   | NAN   |
| 8,00  | -2,00 | -5,00 | -3,00 |
| 9,00  | -2,00 | 6,00  | -1,00 |
| 10,00 | -2,00 | 1,00  | 0,00  |
| 7,00  | -2,00 | 7,00  | 0,00  |
| 9,00  | -2,00 | -1,00 | -2,00 |
| 9,00  | 0,00  | 1,00  | -1,00 |
| 7,00  | -3,00 | 1,00  | -3,00 |
| 8,00  | -2,00 | 9,00  | -2,00 |
| 5,00  | -3,00 | 2,00  | -1,00 |
| 4,00  | -2,00 | -2,00 | -1,00 |
| 10,00 | -2,00 | 9,00  | -3,00 |
| 9,00  | -1,00 | 7,00  | -1,00 |
| 7,00  | -3,00 | 7,00  | -2,00 |
| NAN   | NAN   | 8,00  | -2,00 |
| 6,00  | -1,00 | 0,00  | -2,00 |
| 5,00  | -2,00 | NAN   | NAN   |
| 7,00  | -2,00 | 0,00  | -2,00 |
| 9,00  | -3,00 | 3,00  | -2,00 |
| 8,00  | -2,00 | 9,00  | -1,00 |
| 10,00 | -1,00 | 5,00  | -3,00 |
| 7,00  | -3,00 | -3,00 | -3,00 |
| 10,00 | -1,00 | 1,00  | -2,00 |
| 4,00  | -1,00 | -1,00 | -2,00 |

|       |       |       |       |
|-------|-------|-------|-------|
| 9,00  | -2,00 | 0,00  | -1,00 |
| 8,00  | -3,00 | 9,00  | -3,00 |
| 9,00  | -2,00 | 2,00  | -3,00 |
| 9,00  | -2,00 | 5,00  | -2,00 |
| 5,00  | -1,00 | NAN   | NAN   |
| 9,00  | 0,00  | 4,00  | -3,00 |
| 7,00  | -3,00 | -1,00 | -2,00 |
| 8,00  | -3,00 | 5,00  | -1,00 |
| NAN   | -2,00 | 0,00  | -3,00 |
| 7,00  | -1,00 | -1,00 | -2,00 |
| 7,00  | -1,00 | 4,00  | -1,00 |
| NAN   | -1,00 | 8,00  | 0,00  |
| NAN   | -2,00 | 2,00  | -1,00 |
| 9,00  | -3,00 | 3,00  | -1,00 |
| 6,00  | -3,00 | 1,00  | -2,00 |
| 11,00 | -3,00 | -5,00 | -2,00 |

| identificacion_micros | IDENTIFICACION | Log2mir222_2ddCt_g1_24s | Log2mir103_2ddCt_g1_24s |
|-----------------------|----------------|-------------------------|-------------------------|
| PDG0005               | PDG0005        | 1,13                    | 0,92                    |
| NAN                   | PDG0014        | NAN                     | NAN                     |
| PDG0021               | PDG0021        | 1,38                    | 0,55                    |
| PDG0022               | PDG0022        | 1,57                    | 0,48                    |
| PDG0023               | PDG0023        | 1,83                    | 1,20                    |
| PDG0028               | PDG0028        | 1,71                    | 1,24                    |
| NAN                   | PDG0039        | NAN                     | NAN                     |
| PDG0045               | PDG0045        | 1,93                    | 1,17                    |
| PDG0048               | PDG0048        | 1,53                    | 1,58                    |
| PDG0049               | PDG0049        | NAN                     | 1,91                    |
| PDG0050               | PDG0050        | 1,76                    | 1,99                    |
| PDG0053               | PDG0053        | 2,12                    | 1,38                    |
| PDG0055               | PDG0055        | -2,10                   | -1,02                   |
| PDG0058               | PDG0058        | -1,59                   | -1,37                   |
| PDG0060               | PDG0060        | -1,86                   | -2,13                   |
| PDG0077               | PDG0077        | -3,41                   | -2,29                   |
| NAN                   | PDG0081        | NAN                     | NAN                     |
| PDG0083               | PDG0083        | -1,78                   | -4,91                   |
| PDG0095               | PDG0095        | -2,42                   | -1,32                   |
| PDG0096               | PDG0096        | NAN                     | -2,73                   |
| PDG0097               | PDG0097        | NAN                     | -1,64                   |
| PDG0104               | PDG0104        | -2,05                   | -2,67                   |
| PDG0105               | PDG0105        | -1,58                   | -1,70                   |
| NAN                   | PDG0110        | NAN                     | NAN                     |
| PDG0112               | PDG0112        | 1,83                    | 0,21                    |
| PDG0114               | PDG0114        | -0,47                   | -0,33                   |
| PDG0123               | PDG0123        | NAN                     | NAN                     |
| PDG0131               | PDG0131        | -1,52                   | -2,48                   |
| NAN                   | PDG0132        | NAN                     | NAN                     |
| NAN                   | PDG0133        | NAN                     | NAN                     |
| PDG0135               | PDG0135        | -0,88                   | -1,94                   |
| PDG0136               | PDG0136        | -0,88                   | -1,79                   |
| NAN                   | PDG0151        | NAN                     | NAN                     |
| NAN                   | PDG0152        | NAN                     | NAN                     |
| PDG0156               | PDG0156        | -1,32                   | -1,49                   |
| PDG0164               | PDG0164        | 0,97                    | 0,84                    |
| PDG0165               | PDG0165        | -0,57                   | -0,85                   |
| PDG0173               | PDG0173        | 0,80                    | -0,94                   |
| PDG0179               | PDG0179        | 1,09                    | 0,58                    |
| NAN                   | PDG0182        | NAN                     | NAN                     |
| NAN                   | PDG0189        | NAN                     | NAN                     |
| PDG0192               | PDG0192        | 1,20                    | 0,73                    |
| NAN                   | PDG0195        | NAN                     | NAN                     |
| NAN                   | PDG0197        | NAN                     | NAN                     |
| NAN                   | PDG0207        | NAN                     | NAN                     |
| NAN                   | PDG0217        | NAN                     | NAN                     |
| NAN                   | PDG0223        | NAN                     | NAN                     |

|         |         |       |       |
|---------|---------|-------|-------|
| PDG0224 | PDG0224 | NAN   | 1,35  |
| NAN     | PDG0230 | NAN   | NAN   |
| PDG0231 | PDG0231 | 1,27  | 0,73  |
| NAN     | PDG0233 | NAN   | NAN   |
| NAN     | PDG0243 | NAN   | NAN   |
| NAN     | PDG0244 | NAN   | NAN   |
| NAN     | PDG0251 | NAN   | NAN   |
| NAN     | PDG0256 | NAN   | NAN   |
| NAN     | PDG0260 | NAN   | NAN   |
| NAN     | PDG0261 | NAN   | NAN   |
| NAN     | PDG0262 | NAN   | NAN   |
| NAN     | PDG0264 | NAN   | NAN   |
| PDG0265 | PDG0265 | 0,63  | -1,41 |
| PDG0266 | PDG0266 | 0,75  | -1,20 |
| PDG0271 | PDG0271 | 0,50  | -1,39 |
| NAN     | PDG0276 | NAN   | NAN   |
| PDG0279 | PDG0279 | -0,70 | -1,48 |
| PDG0283 | PDG0283 | 0,14  | -0,94 |
| PDG0284 | PDG0284 | 1,37  | -2,19 |
| PDG0294 | PDG0294 | 0,07  | -1,14 |
| NAN     | PDG0297 | NAN   | NAN   |
| PDG0298 | PDG0298 | 0,12  | -2,05 |
| PDG0299 | PDG0299 | -0,71 | -0,93 |
| PDG0301 | PDG0301 | -0,26 | -1,74 |
| PDG0306 | PDG0306 | -0,67 | -2,10 |
| NAN     | PDG0311 | NAN   | NAN   |
| PDG0316 | PDG0316 | -0,37 | -2,19 |
| PDG0320 | PDG0320 | 1,28  | -0,28 |
| PDG0328 | PDG0328 | -0,55 | -1,26 |
| PDG0332 | PDG0332 | 1,24  | 0,46  |
| PDG0335 | PDG0335 | -0,03 | -0,15 |
| PDG0336 | PDG0336 | -0,06 | -1,09 |
| PDG0337 | PDG0337 | 1,17  | 0,34  |
| NAN     | PDG0339 | NAN   | NAN   |
| PDG0341 | PDG0341 | 0,22  | -0,55 |
| NAN     | PDG0344 | NAN   | NAN   |
| NAN     | PDG0348 | NAN   | NAN   |
| PDG0351 | PDG0351 | 2,04  | -0,25 |
| PDG0352 | PDG0352 | 2,64  | 0,40  |
| PDG0355 | PDG0355 | 2,46  | 0,90  |
| PDG0358 | PDG0358 | 1,91  | -0,15 |
| PDG0363 | PDG0363 | 1,09  | -0,85 |
| PDG0364 | PDG0364 | 2,93  | 0,01  |
| PDG0370 | PDG0370 | 2,73  | 0,76  |
| PDG0371 | PDG0371 | 2,74  | 1,16  |
| NAN     | PDG0376 | NAN   | NAN   |
| NAN     | PDG0377 | NAN   | NAN   |
| NAN     | PDG0381 | NAN   | NAN   |
| NAN     | PDG0385 | NAN   | NAN   |
| PDG0390 | PDG0390 | 2,21  | -0,16 |

|         |         |       |       |
|---------|---------|-------|-------|
| PDG0394 | PDG0394 | 2,42  | -0,12 |
| PDG0396 | PDG0396 | -2,98 | -3,07 |
| PDG0401 | PDG0401 | -2,65 | -2,79 |
| PDG0404 | PDG0404 | -2,12 | -2,12 |
| PDG0406 | PDG0406 | -1,38 | -2,32 |
| NAN     | PDG0411 | NAN   | NAN   |
| PDG0412 | PDG0412 | -2,08 | -2,86 |
| PDG0414 | PDG0414 | -1,90 | -2,53 |
| PDG0418 | PDG0418 | -1,23 | -1,31 |
| NAN     | PDG0419 | NAN   | NAN   |
| PDG0426 | PDG0426 | 0,12  | NAN   |
| PDG0430 | PDG0430 | -2,28 | -2,37 |
| PDG0437 | PDG0437 | 1,43  | -0,08 |
| PDG0442 | PDG0442 | NAN   | -3,16 |
| PDG0444 | PDG0444 | 1,40  | 0,26  |
| PDG0448 | PDG0448 | 1,97  | 2,43  |
| NAN     | PDG0456 | NAN   | NAN   |
| PDG0464 | PDG0464 | 1,38  | 0,79  |
| PDG0465 | PDG0465 | 2,34  | 1,31  |
| PDG0471 | PDG0471 | 2,29  | 0,99  |
| PDG0474 | PDG0474 | 1,65  | 0,50  |
| PDG0477 | PDG0477 | 2,36  | 2,10  |
| PDG0482 | PDG0482 | NAN   | 0,88  |
| PDG0484 | PDG0484 | 0,35  | 0,74  |
| PDG0485 | PDG0485 | 1,98  | 0,13  |
| NAN     | PDG0491 | NAN   | NAN   |
| PDG0492 | PDG0492 | 2,07  | 1,10  |
| PDG0496 | PDG0496 | 1,96  | 1,01  |
| PDG0501 | PDG0501 | 0,98  | -0,25 |
| PDG0505 | PDG0505 | NAN   | 0,32  |
| PDG0506 | PDG0506 | 1,29  | 1,02  |
| PDG0509 | PDG0509 | 1,93  | 1,56  |
| PDG0512 | PDG0512 | -0,19 | -1,90 |
| PDG0515 | PDG0515 | 0,28  | 0,19  |
| PDG0524 | PDG0524 | 2,47  | 1,71  |
| PDG0527 | PDG0527 | -0,85 | -2,87 |
| NAN     | PDG0528 | NAN   | NAN   |
| PDG0529 | PDG0529 | 2,36  | 1,50  |
| PDG0535 | PDG0535 | 0,12  | 1,12  |
| PDG0536 | PDG0536 | NAN   | NAN   |
| PDG0538 | PDG0538 | -1,73 | -2,10 |
| PDG0542 | PDG0542 | 0,28  | -2,07 |
| PDG0544 | PDG0544 | 0,01  | 1,00  |
| PDG0545 | PDG0545 | 0,23  | -3,08 |
| PDG0547 | PDG0547 | -1,07 | NAN   |
| PDG0552 | PDG0552 | NAN   | NAN   |
| PDG0555 | PDG0555 | -1,20 | -2,18 |
| PDG0572 | PDG0572 | 1,00  | 1,36  |
| PDG0574 | PDG0574 | 5,02  | NAN   |
| PDG0576 | PDG0576 | -0,13 | 1,12  |

|         |         |      |       |
|---------|---------|------|-------|
| PDG0580 | PDG0580 | 0,14 | 0,55  |
| PDG0581 | PDG0581 | 0,71 | -1,27 |
| NAN     | PDG0588 | NAN  | NAN   |
| PDG0590 | PDG0590 | 0,37 | -1,46 |
| NAN     | PDG0591 | NAN  | NAN   |
| PDG0592 | PDG0592 | 1,16 | 1,40  |
| NAN     | PDG0601 | NAN  | NAN   |
| PDG0608 | PDG0608 | 0,67 | -1,50 |
| PDG0611 | PDG0611 | 0,52 | -0,96 |
| PDG0612 | PDG0612 | 1,33 | 2,81  |
| PDG0613 | PDG0613 | 1,01 | -0,50 |
| PDG0615 | PDG0615 | 0,41 | -1,35 |
| PDG0616 | PDG0616 | 1,10 | 2,58  |
| PDG0622 | PDG0622 | 0,29 | -0,49 |
| PDG0623 | PDG0623 | 0,33 | -1,26 |
| PDG0624 | PDG0624 | 0,80 | -0,85 |
| PDG0626 | PDG0626 | 0,48 | -0,87 |
| PDG0632 | PDG0632 | 0,24 | -1,50 |
| PDG0640 | PDG0640 | 1,42 | 1,14  |
| PDG0642 | PDG0642 | 0,47 | 0,58  |
| PDG0644 | PDG0644 | 1,19 | 2,49  |
| PDG0647 | PDG0647 | 1,28 | 1,82  |
| PDG0649 | PDG0649 | 1,43 | 1,90  |
| PDG0660 | PDG0660 | 0,27 | -1,29 |
| PDG0664 | PDG0664 | 0,83 | 1,57  |
| PDG0666 | PDG0666 | 0,92 | 0,90  |
| PDG0673 | PDG0673 | 1,55 | 0,39  |
| PDG0676 | PDG0676 | 1,87 | 1,98  |
| PDG0679 | PDG0679 | 1,61 | 0,65  |
| PDG0680 | PDG0680 | 1,24 | 0,87  |
| PDG0683 | PDG0683 | 1,36 | 0,42  |
| PDG0684 | PDG0684 | 0,83 | -0,07 |
| PDG0685 | PDG0685 | 0,02 | -1,52 |
| PDG0687 | PDG0687 | 0,65 | 1,09  |
| PDG0688 | PDG0688 | 1,95 | 1,45  |
| PDG0691 | PDG0691 | 1,02 | 0,57  |
| NAN     | PDG0692 | NAN  | NAN   |
| PDG0694 | PDG0694 | 1,45 | 0,33  |
| NAN     | PDG0695 | NAN  | NAN   |
| NAN     | PDG0696 | NAN  | NAN   |
| PDG0704 | PDG0704 | 0,42 | 1,78  |
| PDG0706 | PDG0706 | 0,06 | -2,17 |
| PDG0709 | PDG0709 | 0,07 | 0,48  |
| PDG0711 | PDG0711 | 1,79 | 1,22  |
| PDG0715 | PDG0715 | 1,48 | 3,26  |
| PDG0718 | PDG0718 | 3,97 | 3,05  |
| PDG0720 | PDG0720 | 0,84 | 1,86  |
| PDG0723 | PDG0723 | 1,82 | 2,47  |
| PDG0725 | PDG0725 | 1,44 | 1,98  |
| PDG0733 | PDG0733 | 1,32 | 1,97  |

|         |         |       |       |
|---------|---------|-------|-------|
| PDG0736 | PDG0736 | 2,14  | 2,92  |
| PDG0744 | PDG0744 | 1,10  | 2,37  |
| PDG0747 | PDG0747 | 2,54  | 2,45  |
| PDG0751 | PDG0751 | 2,30  | 2,72  |
| PDG0753 | PDG0753 | 1,89  | 2,10  |
| PDG0754 | PDG0754 | 1,81  | 2,43  |
| PDG0758 | PDG0758 | 1,44  | 1,47  |
| PDG0765 | PDG0765 | 1,21  | 3,97  |
| PDG0768 | PDG0768 | 1,51  | 1,32  |
| PDG0769 | PDG0769 | 0,98  | 2,27  |
| PDG0772 | PDG0772 | 1,96  | 2,34  |
| PDG0777 | PDG0777 | 1,16  | 1,42  |
| PDG0779 | PDG0779 | 1,15  | 1,91  |
| PDG0789 | PDG0789 | 1,28  | 1,64  |
| PDG0792 | PDG0792 | 1,20  | 2,73  |
| PDG0793 | PDG0793 | 1,12  | 1,39  |
| PDG0807 | PDG0807 | 1,53  | 2,23  |
| PDG0809 | PDG0809 | 2,02  | 2,99  |
| PDG0814 | PDG0814 | 1,37  | 2,24  |
| PDG0815 | PDG0815 | 1,87  | 2,24  |
| PDG0817 | PDG0817 | 0,29  | -0,47 |
| PDG0820 | PDG0820 | 1,28  | 1,85  |
| PDG0821 | PDG0821 | 2,36  | 3,27  |
| PDG0822 | PDG0822 | 0,93  | 0,81  |
| PDG0828 | PDG0828 | 1,80  | 4,19  |
| PDG0829 | PDG0829 | 1,81  | 2,84  |
| PDG0831 | PDG0831 | -0,07 | 0,44  |
| PDG0833 | PDG0833 | 2,05  | 2,32  |
| PDG0834 | PDG0834 | 1,20  | 1,74  |
| PDG0837 | PDG0837 | 0,29  | 0,53  |
| PDG0843 | PDG0843 | 0,54  | 1,85  |
| PDG0847 | PDG0847 | 1,34  | 2,82  |
| NAN     | PDG0849 | NAN   | NAN   |
| PDG0851 | PDG0851 | 0,75  | 2,17  |
| PDG0852 | PDG0852 | 1,79  | 4,08  |
| PDG0857 | PDG0857 | 0,88  | 0,68  |
| PDG0860 | PDG0860 | 2,06  | 2,35  |
| PDG0868 | PDG0868 | 1,34  | 1,57  |
| PDG0869 | PDG0869 | 0,93  | 1,49  |
| PDG0871 | PDG0871 | 0,83  | -0,11 |
| PDG0874 | PDG0874 | 0,97  | 1,33  |
| PDG0877 | PDG0877 | -0,06 | 1,93  |
| PDG0878 | PDG0878 | 1,04  | 1,21  |
| PDG0885 | PDG0885 | 1,16  | -0,59 |
| PDG0886 | PDG0886 | 1,47  | 1,67  |
| PDG0896 | PDG0896 | 1,13  | 2,16  |
| PDG0899 | PDG0899 | 0,25  | 0,50  |
| PDG0900 | PDG0900 | -1,67 | -1,23 |
| PDG0901 | PDG0901 | -0,24 | -0,63 |
| PDG0902 | PDG0902 | 0,98  | 0,18  |

|         |         |       |       |
|---------|---------|-------|-------|
| PDG0907 | PDG0907 | 0,59  | -0,85 |
| PDG0909 | PDG0909 | 1,16  | 0,31  |
| PDG0910 | PDG0910 | 1,11  | -0,56 |
| PDG0911 | PDG0911 | 0,45  | -0,34 |
| PDG0912 | PDG0912 | -0,68 | -1,64 |
| PDG0915 | PDG0915 | -0,22 | -1,00 |
| PDG0922 | PDG0922 | 0,04  | 1,98  |
| PDG0923 | PDG0923 | 1,58  | 3,70  |
| PDG0929 | PDG0929 | 0,40  | 1,72  |
| PDG0930 | PDG0930 | -1,63 | -2,56 |
| PDG0932 | PDG0932 | NAN   | NAN   |
| PDG0933 | PDG0933 | 1,48  | 3,78  |
| PDG0940 | PDG0940 | 1,07  | 3,41  |
| PDG0941 | PDG0941 | 1,75  | 2,72  |
| PDG0944 | PDG0944 | 1,33  | 2,57  |
| PDG0945 | PDG0945 | 0,33  | 2,43  |
| PDG0946 | PDG0946 | 0,95  | 2,52  |
| PDG0952 | PDG0952 | 1,45  | 1,57  |
| PDG0956 | PDG0956 | 3,31  | 0,91  |
| PDG0963 | PDG0963 | 0,96  | 1,85  |
| PDG0971 | PDG0971 | 2,41  | 1,05  |
| PDG0974 | PDG0974 | 3,51  | 2,55  |
| PDG0975 | PDG0975 | 2,78  | 1,30  |
| PDG0977 | PDG0977 | 2,57  | 1,19  |
| PDG0979 | PDG0979 | 3,70  | 2,50  |
| PDG0984 | PDG0984 | 2,94  | 0,86  |
| PDG0985 | PDG0985 | 3,85  | 1,82  |
| PDG0988 | PDG0988 | 3,98  | 2,68  |
| PDG0992 | PDG0992 | 4,22  | 2,69  |
| PDG0993 | PDG0993 | 4,72  | 5,90  |
| PDG0998 | PDG0998 | 5,83  | 6,84  |
| PDG1001 | PDG1001 | 6,59  | 6,75  |
| PDG1002 | PDG1002 | 0,12  | 2,15  |
| PDG1034 | PDG1034 | 5,55  | 5,65  |
| PDG1043 | PDG1043 | 1,89  | 2,74  |
| PDG1045 | PDG1045 | 4,99  | 5,65  |
| PDG1050 | PDG1050 | 1,08  | 2,36  |
| PDG1051 | PDG1051 | 1,26  | 2,54  |
| PDG1053 | PDG1053 | 1,37  | 2,55  |
| NAN     | PDG1054 | NAN   | NAN   |
| PDG1057 | PDG1057 | NAN   | NAN   |
| PDG1059 | PDG1059 | 1,33  | 1,70  |
| PDG1070 | PDG1070 | 4,89  | 5,54  |
| PDG1073 | PDG1073 | 2,28  | 2,89  |
| PDG1076 | PDG1076 | 4,16  | 3,62  |
| PDG1079 | PDG1079 | 5,63  | 5,54  |
| PDG1080 | PDG1080 | 4,81  | 4,61  |
| PDG1083 | PDG1083 | 4,41  | 4,53  |
| PDG1088 | PDG1088 | 5,88  | 5,91  |
| PDG1089 | PDG1089 | 5,80  | 5,96  |



|         |         |      |      |
|---------|---------|------|------|
| PDG1091 | PDG1091 | 5,46 | 5,60 |
| PDG1092 | PDG1092 | 5,54 | 5,21 |
| PDG1093 | PDG1093 | 5,32 | 4,86 |
| PDG1095 | PDG1095 | 1,80 | 2,25 |
| PDG1098 | PDG1098 | 2,33 | 2,47 |
| PDG1099 | PDG1099 | 1,42 | 1,32 |
| PDG1100 | PDG1100 | 1,23 | 2,26 |
| PDG1102 | PDG1102 | 2,00 | 1,69 |
| PDG1106 | PDG1106 | 1,30 | 0,75 |
| PDG1107 | PDG1107 | 1,14 | 3,28 |
| PDG1109 | PDG1109 | 2,50 | 1,39 |
| PDG1113 | PDG1113 | 2,53 | 1,40 |
| PDG1114 | PDG1114 | 2,77 | 2,27 |
| PDG1115 | PDG1115 | 1,35 | 0,56 |
| PDG1116 | PDG1116 | 1,71 | 1,37 |
| PDG1117 | PDG1117 | 1,42 | 0,78 |

| Log2mir29_2ddCt_g1_24s | Log2mir132_2ddct_g1_24s | Log2mir222_2ddCt_g1_2A |
|------------------------|-------------------------|------------------------|
| -0,37                  | -0,45                   | 1,57                   |
| NAN                    | NAN                     | NAN                    |
| 0,32                   | 0,02                    | 1,51                   |
| 0,09                   | -0,20                   | 1,68                   |
| -0,05                  | -0,40                   | NAN                    |
| -0,14                  | 0,66                    | 2,29                   |
| NAN                    | NAN                     | NAN                    |
| -0,58                  | NAN                     | 2,80                   |
| -0,05                  | -0,58                   | 0,69                   |
| 0,36                   | 0,89                    | 1,48                   |
| -0,34                  | -0,06                   | 1,08                   |
| 0,44                   | -0,02                   | 1,48                   |
| -1,80                  | -0,11                   | -1,65                  |
| -2,88                  | 0,36                    | -0,11                  |
| -1,88                  | NAN                     | NAN                    |
| -2,54                  | -0,06                   | NAN                    |
| NAN                    | NAN                     | NAN                    |
| -2,62                  | 0,58                    | -1,39                  |
| -2,52                  | 1,70                    | -1,36                  |
| -3,07                  | 1,42                    | NAN                    |
| NAN                    | 0,82                    | -2,81                  |
| -2,78                  | 1,59                    | -2,68                  |
| -4,21                  | 0,63                    | -1,87                  |
| NAN                    | NAN                     | NAN                    |
| 1,09                   | 1,51                    | 1,45                   |
| -0,95                  | 0,91                    | 0,39                   |
| NAN                    | NAN                     | NAN                    |
| -1,06                  | NAN                     | NAN                    |
| NAN                    | NAN                     | NAN                    |
| NAN                    | NAN                     | NAN                    |
| -1,25                  | NAN                     | -0,48                  |
| -0,61                  | NAN                     | -0,03                  |
| NAN                    | NAN                     | NAN                    |
| NAN                    | NAN                     | NAN                    |
| 0,08                   | 0,00                    | -1,41                  |
| -0,07                  | 1,85                    | 0,33                   |
| -0,78                  | NAN                     | 0,19                   |
| -1,49                  | 1,84                    | -0,30                  |
| NAN                    | NAN                     | 1,26                   |
| NAN                    | NAN                     | NAN                    |
| NAN                    | NAN                     | NAN                    |
| 2,12                   | -0,19                   | 1,34                   |
| NAN                    | NAN                     | NAN                    |

|       |       |       |
|-------|-------|-------|
| NAN   | NAN   | NAN   |
| NAN   | NAN   | NAN   |
| 0,69  | NAN   | -0,23 |
| NAN   | NAN   | NAN   |
| 1,22  | -0,91 | 0,49  |
| 1,70  | -1,06 | 0,20  |
| -0,29 | -1,09 | 0,15  |
| NAN   | NAN   | NAN   |
| -0,17 | -0,55 | -0,52 |
| 1,85  | -1,12 | 0,76  |
| 1,70  | -1,78 | 2,23  |
| 1,14  | -0,44 | 0,07  |
| NAN   | NAN   | NAN   |
| 1,92  | -1,17 | 0,83  |
| -0,10 | 0,69  | -0,08 |
| 0,35  | -0,03 | -0,12 |
| -0,74 | -0,20 | -0,77 |
| NAN   | NAN   | NAN   |
| -0,12 | 0,21  | 0,18  |
| 0,24  | 1,36  | 0,85  |
| 0,09  | 1,36  | 0,84  |
| -0,34 | NAN   | 0,98  |
| 0,48  | 0,30  | 0,56  |
| 0,47  | 0,85  | 0,70  |
| 0,97  | 0,12  | 0,87  |
| NAN   | NAN   | NAN   |
| -0,86 | NAN   | 1,10  |
| NAN   | NAN   | NAN   |
| NAN   | NAN   | NAN   |
| 3,18  | NAN   | 1,59  |
| 4,85  | NAN   | 2,00  |
| 3,03  | NAN   | 2,54  |
| 3,37  | 0,05  | 1,40  |
| 3,26  | NAN   | 2,83  |
| 3,70  | 0,36  | 1,71  |
| 3,80  | NAN   | 1,65  |
| 3,64  | 1,52  | 1,41  |
| NAN   | NAN   | NAN   |
| 3,41  | 0,38  | 2,19  |

|       |       |       |
|-------|-------|-------|
| 3,81  | 1,28  | 3,11  |
| -0,08 | NAN   | -2,42 |
| -0,08 | NAN   | 0,29  |
| -0,58 | NAN   | -0,58 |
| 1,64  | NAN   | 0,25  |
| NAN   | NAN   | NAN   |
| 0,26  | NAN   | -1,69 |
| -0,95 | NAN   | -1,55 |
| 0,00  | -0,06 | -2,67 |
| NAN   | NAN   | NAN   |
| -0,64 | NAN   | -1,27 |
| -1,66 | NAN   | -2,94 |
| 0,53  | 0,73  | 2,34  |
| -2,20 | NAN   | NAN   |
| 0,74  | 0,15  | 1,50  |
| 1,02  | 0,48  | 1,91  |
| NAN   | NAN   | NAN   |
| 0,03  | 0,65  | 0,42  |
| 1,12  | 0,90  | 2,53  |
| 1,39  | NAN   | 1,06  |
| 0,13  | NAN   | 1,95  |
| 1,21  | 0,36  | 2,22  |
| 1,43  | 0,91  | 2,48  |
| 0,01  | NAN   | 1,98  |
| 0,10  | NAN   | 1,18  |
| NAN   | NAN   | NAN   |
| 0,93  | 0,51  | 1,62  |
| 0,76  | NAN   | 0,46  |
| 0,22  | -0,71 | 1,53  |
| NAN   | NAN   | NAN   |
| 1,90  | 0,35  | 0,67  |
| 2,00  | 0,53  | 2,65  |
| -1,34 | -0,17 | -0,54 |
| NAN   | NAN   | -0,14 |
| 1,44  | 1,12  | 1,64  |
| -1,15 | -0,31 | -1,06 |
| NAN   | NAN   | NAN   |
| 1,26  | 0,34  | 2,09  |
| -2,40 | -0,98 | -0,67 |
| NAN   | NAN   | NAN   |
| -1,84 | NAN   | 0,98  |
| -1,21 | NAN   | -0,35 |
| -2,00 | -1,71 | 2,53  |
| -1,41 | NAN   | 0,34  |
| -2,73 | NAN   | -0,27 |
| NAN   | NAN   | 5,20  |
| -1,27 | -0,89 | -1,01 |
| -2,14 | -0,19 | -0,29 |
| NAN   | NAN   | NAN   |
| -2,83 | NAN   | 0,81  |

|       |       |       |
|-------|-------|-------|
| 0,28  | -0,79 | NAN   |
| -1,06 | 0,25  | -1,31 |
| NAN   | NAN   | NAN   |
| -0,21 | NAN   | -1,76 |
| NAN   | NAN   | NAN   |
| 2,77  | NAN   | 1,47  |
| NAN   | NAN   | NAN   |
| -1,04 | 0,23  | -2,61 |
| -0,85 | 0,01  | 0,45  |
| -0,81 | 0,35  | 0,88  |
| 0,18  | 0,00  | -0,58 |
| 0,29  | -0,63 | 0,18  |
| -2,10 | -0,17 | 1,13  |
| -1,04 | -0,13 | 0,85  |
| -0,44 | -0,50 | 0,16  |
| 0,21  | -0,72 | -0,50 |
| 0,19  | -0,04 | -0,56 |
| 0,46  | 0,24  | -0,96 |
| 2,53  | NAN   | 1,71  |
| -1,94 | -0,95 | 0,14  |
| -1,33 | 0,19  | 0,92  |
| 2,50  | NAN   | 0,70  |
| -1,17 | 0,43  | 0,84  |
| 0,10  | -0,07 | -0,40 |
| -2,00 | -0,96 | 2,64  |
| 2,12  | 0,32  | 0,71  |
| -0,45 | 1,05  | 1,09  |
| 0,15  | 0,53  | 1,17  |
| -1,27 | -0,24 | 1,57  |
| -1,27 | 0,85  | 1,43  |
| -0,63 | 0,75  | 0,69  |
| -1,88 | 0,70  | 0,12  |
| 0,37  | -0,55 | -0,73 |
| 2,60  | 1,48  | 1,08  |
| -0,20 | 0,77  | 2,11  |
| -1,03 | 1,36  | 0,63  |
| NAN   | NAN   | NAN   |
| -2,26 | 1,33  | 1,02  |
| NAN   | NAN   | NAN   |
| NAN   | NAN   | NAN   |
| -0,81 | NAN   | 0,07  |
| -0,41 | -1,16 | 0,45  |
| 2,50  | 1,70  | 0,47  |
| -1,62 | 0,78  | 2,32  |
| -2,28 | NAN   | 1,05  |
| -1,26 | 0,44  | 2,08  |
| 1,74  | 1,33  | 1,03  |
| -1,79 | 0,39  | NAN   |
| -1,62 | -0,96 | 1,96  |
| -1,86 | -0,88 | 0,96  |

|       |       |       |
|-------|-------|-------|
| -1,48 | -0,21 | 2,37  |
| NAN   | -0,36 | 1,50  |
| -1,01 | 0,13  | 1,36  |
| -0,93 | 0,94  | 1,53  |
| -1,74 | -0,60 | 2,44  |
| -2,11 | -0,58 | 1,04  |
| NAN   | 0,00  | 1,38  |
| 0,12  | -1,20 | 1,03  |
| 3,02  | NAN   | 1,18  |
| -0,82 | -0,85 | 0,31  |
| -1,28 | 0,20  | 1,99  |
| -1,58 | -0,52 | 0,93  |
| -1,56 | NAN   | 0,86  |
| 2,76  | 0,85  | 1,55  |
| -2,96 | -0,96 | 0,75  |
| 2,44  | 0,91  | 1,49  |
| -1,79 | -0,07 | 1,53  |
| 1,30  | 0,37  | 1,63  |
| -1,16 | 0,27  | 1,32  |
| -2,51 | 0,51  | 2,04  |
| -0,13 | -0,26 | 0,24  |
| 0,48  | -0,72 | 0,79  |
| 0,40  | 0,15  | 1,19  |
| 1,04  | NAN   | 1,80  |
| 1,26  | 0,18  | 1,00  |
| 1,06  | NAN   | NAN   |
| -0,15 | NAN   | 0,76  |
| 0,33  | 0,24  | 2,19  |
| 0,07  | -0,09 | 2,64  |
| 0,01  | NAN   | 0,84  |
| -0,37 | NAN   | 1,51  |
| -0,25 | -0,41 | 1,96  |
| NAN   | NAN   | NAN   |
| -1,99 | 1,02  | 1,34  |
| 0,44  | 0,58  | 0,66  |
| 1,45  | -0,55 | 2,18  |
| 0,98  | 0,89  | 0,95  |
| 1,49  | 0,01  | 1,31  |
| 1,15  | -0,50 | 0,87  |
| -0,47 | 0,56  | 2,92  |
| 1,04  | -1,02 | 1,57  |
| -0,44 | NAN   | 1,21  |
| 1,27  | -0,20 | 2,14  |
| 2,88  | -0,88 | -0,11 |
| 1,52  | -0,04 | 0,86  |
| 0,71  | -0,22 | 0,61  |
| 1,25  | -1,53 | 1,11  |
| -2,34 | -1,76 | -0,06 |
| -1,51 | -1,26 | 0,12  |
| 0,09  | 0,31  | 0,75  |

|       |       |       |
|-------|-------|-------|
| -0,88 | -0,27 | 0,38  |
| -0,29 | 0,61  | 1,64  |
| -0,71 | 0,01  | 0,79  |
| -1,25 | -0,59 | 1,19  |
| -2,41 | -0,58 | 0,37  |
| -1,74 | -0,23 | 0,17  |
| 0,18  | -1,37 | 1,58  |
| 0,89  | -0,54 | 0,55  |
| 0,46  | 0,07  | 0,99  |
| 2,67  | -0,72 | 0,82  |
| NAN   | NAN   | 0,25  |
| 0,03  | 0,16  | 0,13  |
| 0,21  | -0,93 | 1,09  |
| 1,10  | 0,34  | 0,16  |
| 0,73  | 0,24  | 0,83  |
| 0,12  | -0,82 | 0,34  |
| 0,56  | -0,65 | 0,61  |
| 0,58  | NAN   | 2,27  |
| 3,15  | 2,99  | 4,47  |
| 0,19  | NAN   | 0,97  |
| 1,93  | 2,46  | 1,87  |
| 2,96  | 2,84  | 3,33  |
| 2,38  | 3,13  | 2,34  |
| 2,67  | 2,09  | 3,23  |
| 2,95  | 4,17  | 4,03  |
| 2,53  | 2,67  | NAN   |
| 3,44  | NAN   | 6,66  |
| 3,17  | 3,19  | 3,81  |
| 2,75  | NAN   | 4,38  |
| 4,36  | 3,34  | 6,23  |
| 4,84  | 4,16  | 5,47  |
| 4,37  | 4,19  | 7,95  |
| 0,88  | NAN   | 0,90  |
| 5,23  | 4,06  | 6,52  |
| 1,67  | NAN   | 2,76  |
| 4,49  | 4,67  | 4,82  |
| 0,54  | NAN   | 0,77  |
| 0,78  | NAN   | 1,50  |
| 0,87  | NAN   | NAN   |
| NAN   | NAN   | NAN   |
| NAN   | NAN   | -0,90 |
| 0,50  | NAN   | 1,11  |
| 3,81  | 3,97  | 5,10  |
| 1,29  | NAN   | 2,38  |
| 3,49  | 2,70  | 4,09  |
| 4,71  | 4,31  | 5,30  |
| 4,79  | 3,93  | 4,26  |
| 3,77  | 3,18  | 4,25  |
| 5,18  | 4,26  | 4,53  |
| 4,29  | 3,97  | 5,82  |

|      |       |      |
|------|-------|------|
| 4,86 | 4,04  | 5,46 |
| 5,25 | 4,12  | 6,66 |
| 3,15 | 3,66  | 5,16 |
| 3,56 | -0,23 | 1,52 |
| 1,05 | NAN   | 1,68 |
| 3,45 | NAN   | 1,13 |
| 2,70 | -0,07 | 1,06 |
| 3,46 | 0,21  | 1,04 |
| 3,09 | -1,06 | 2,33 |
| 0,24 | NAN   | 0,97 |
| 2,60 | 0,29  | 2,38 |
| 3,19 | -0,08 | 1,51 |
| 2,78 | 0,65  | 1,41 |
| 2,63 | -0,52 | 1,19 |
| 2,69 | 0,00  | 1,15 |
| 0,99 | -0,46 | 2,70 |



| Log2mir103_2ddCt_g1_2A | Log2mir132_2ddct_g1_2A | Log2mir29_2ddCt_g1_2A |
|------------------------|------------------------|-----------------------|
| 0,68                   | -0,12                  | -0,28                 |
| NAN                    | NAN                    | NAN                   |
| 1,99                   | 0,52                   | -0,26                 |
| 2,40                   | 0,27                   | -0,45                 |
| 3,00                   | 0,81                   | -0,21                 |
| 3,20                   | 0,61                   | -0,52                 |
| NAN                    | NAN                    | NAN                   |
| 3,07                   | 1,38                   | 0,20                  |
| 2,01                   | -0,64                  | -0,67                 |
| 2,14                   | -0,02                  | -0,51                 |
| 1,81                   | -0,60                  | 0,07                  |
| 2,14                   | -0,26                  | -0,11                 |
| -1,74                  | -0,10                  | -2,06                 |
| 0,60                   | NAN                    | NAN                   |
| -1,88                  | -0,69                  | -2,72                 |
| -1,32                  | NAN                    | -1,47                 |
| NAN                    | NAN                    | NAN                   |
| -1,30                  | 0,83                   | -2,58                 |
| -0,47                  | 1,49                   | -2,97                 |
| -2,43                  | NAN                    | -3,03                 |
| -3,46                  | 2,55                   | -0,76                 |
| -0,92                  | 0,62                   | -2,76                 |
| -2,11                  | 0,60                   | -3,48                 |
| NAN                    | NAN                    | NAN                   |
| 2,06                   | 1,04                   | 0,84                  |
| 0,57                   | 0,28                   | -0,61                 |
| NAN                    | NAN                    | NAN                   |
| -2,07                  | NAN                    | -0,92                 |
| NAN                    | NAN                    | NAN                   |
| NAN                    | NAN                    | NAN                   |
| -1,30                  | NAN                    | 0,15                  |
| -0,78                  | NAN                    | -1,79                 |
| NAN                    | NAN                    | NAN                   |
| NAN                    | NAN                    | NAN                   |
| -1,07                  | 0,37                   | -1,38                 |
| 0,87                   | NAN                    | -0,41                 |
| 0,34                   | 0,63                   | -0,52                 |
| 0,60                   | NAN                    | -1,13                 |
| 1,08                   | 1,61                   | -0,96                 |
| NAN                    | NAN                    | NAN                   |
| NAN                    | NAN                    | NAN                   |
| 0,32                   | 0,00                   | 1,96                  |
| NAN                    | NAN                    | NAN                   |

|       |       |       |
|-------|-------|-------|
| NAN   | NAN   | NAN   |
| NAN   | NAN   | NAN   |
| -0,83 | NAN   | 0,70  |
| NAN   | NAN   | NAN   |
| -0,32 | -0,88 | 1,68  |
| NAN   | -1,22 | 1,18  |
| -1,65 | -1,10 | 1,58  |
| NAN   | NAN   | NAN   |
| -0,90 | 0,00  | -0,02 |
| -0,22 | -0,68 | 1,42  |
| -1,69 | -1,04 | 2,20  |
| -0,94 | -0,40 | 1,28  |
| NAN   | NAN   | NAN   |
| -0,20 | -0,44 | 1,83  |
| -0,90 | 0,28  | 0,10  |
| -1,13 | 0,73  | 0,54  |
| -2,32 | 0,26  | 0,11  |
| NAN   | NAN   | NAN   |
| 0,49  | 0,54  | 0,40  |
| 0,23  | 1,67  | 0,12  |
| 0,47  | 1,67  | 0,99  |
| 0,36  | NAN   | -0,29 |
| 0,31  | 1,05  | 0,27  |
| -0,01 | 0,86  | 0,49  |
| -0,05 | 0,18  | 0,58  |
| NAN   | NAN   | NAN   |
| 0,62  | NAN   | -0,71 |
| NAN   | NAN   | NAN   |
| NAN   | NAN   | NAN   |
| -0,74 | -0,19 | 3,99  |
| 0,09  | NAN   | 4,16  |
| 0,61  | NAN   | 4,76  |
| -0,64 | 0,02  | 3,04  |
| 0,14  | NAN   | 4,67  |
| 1,50  | NAN   | 3,45  |
| 0,71  | NAN   | 3,21  |
| -0,26 | NAN   | 2,05  |
| NAN   | NAN   | NAN   |
| 0,24  | 0,78  | 3,56  |

|       |       |       |
|-------|-------|-------|
| -0,02 | NAN   | 2,97  |
| -0,94 | NAN   | 0,61  |
| -1,69 | NAN   | 1,42  |
| -0,91 | NAN   | 0,30  |
| -0,17 | 0,75  | 1,40  |
| NAN   | NAN   | NAN   |
| -0,95 | NAN   | 0,39  |
| -1,40 | NAN   | -0,79 |
| -2,12 | NAN   | 0,15  |
| NAN   | NAN   | NAN   |
| -1,56 | NAN   | -2,54 |
| -2,12 | NAN   | -2,24 |
| 2,11  | NAN   | -1,41 |
| -1,47 | NAN   | -2,12 |
| 1,08  | 0,31  | 0,94  |
| 2,91  | 0,46  | 0,55  |
| NAN   | NAN   | NAN   |
| 0,33  | NAN   | -0,06 |
| 2,72  | 0,77  | 1,21  |
| 1,37  | -0,83 | 0,64  |
| 1,69  | 0,63  | 1,04  |
| 2,79  | 0,67  | 0,92  |
| 2,00  | 0,61  | 1,23  |
| 0,38  | NAN   | 0,80  |
| 0,51  | 0,80  | 0,60  |
| NAN   | NAN   | NAN   |
| 1,75  | 0,86  | 0,84  |
| 0,28  | 0,94  | 0,74  |
| 0,56  | 0,70  | 1,77  |
| 2,41  | NAN   | 0,22  |
| -0,94 | NAN   | 1,49  |
| 1,06  | NAN   | 1,57  |
| -1,48 | -1,64 | -2,20 |
| -0,10 | 0,10  | -2,08 |
| 1,78  | 1,65  | 1,25  |
| -1,64 | NAN   | -0,99 |
| NAN   | NAN   | NAN   |
| -0,14 | 1,00  | 1,92  |
| 1,08  | -1,30 | -3,09 |
| NAN   | NAN   | NAN   |
| -1,70 | 1,00  | -1,42 |
| -2,31 | -0,08 | -0,44 |
| 3,02  | 0,52  | -1,78 |
| -0,13 | 0,09  | -1,56 |
| -2,18 | NAN   | -1,14 |
| NAN   | NAN   | NAN   |
| -1,32 | -2,02 | -2,67 |
| 1,12  | -0,78 | -2,95 |
| NAN   | NAN   | NAN   |
| 2,28  | -0,10 | -1,91 |

|       |       |       |
|-------|-------|-------|
| 1,13  | NAN   | 0,95  |
| -1,58 | -1,21 | -2,41 |
| NAN   | NAN   | NAN   |
| -2,88 | -1,54 | -2,10 |
| NAN   | NAN   | NAN   |
| 1,63  | NAN   | 2,12  |
| NAN   | NAN   | NAN   |
| -1,86 | NAN   | -2,63 |
| 0,02  | NAN   | -1,14 |
| 3,26  | -0,03 | -2,09 |
| -0,72 | NAN   | -0,01 |
| -0,52 | NAN   | -0,39 |
| 2,12  | 0,17  | -1,62 |
| 0,42  | -0,15 | -0,67 |
| -0,48 | -0,78 | -0,44 |
| -0,67 | -0,76 | 0,23  |
| -0,86 | -0,53 | -0,57 |
| -1,29 | NAN   | 0,11  |
| 2,09  | 1,12  | 2,95  |
| 2,46  | -0,38 | -2,20 |
| 3,11  | 0,49  | -1,78 |
| 2,72  | NAN   | 2,34  |
| 1,60  | -0,31 | -2,61 |
| -0,97 | NAN   | 0,16  |
| 4,20  | 1,08  | -1,01 |
| 1,72  | 0,39  | 2,25  |
| 0,74  | NAN   | -0,78 |
| 0,89  | 0,30  | -1,65 |
| 0,99  | -0,11 | -2,46 |
| 1,47  | 0,37  | -1,03 |
| 0,48  | NAN   | -0,81 |
| 0,25  | 0,32  | -1,92 |
| -0,42 | -0,89 | -0,61 |
| -2,82 | NAN   | -0,01 |
| 2,04  | NAN   | -0,67 |
| 0,78  | 0,83  | -2,56 |
| NAN   | NAN   | NAN   |
| 0,55  | NAN   | -1,06 |
| NAN   | NAN   | NAN   |
| NAN   | NAN   | NAN   |
| 1,39  | NAN   | -0,58 |
| -0,66 | -0,59 | 0,04  |
| 1,88  | 2,68  | 2,94  |
| 1,29  | NAN   | -2,57 |
| 2,41  | -1,31 | -1,55 |
| 3,95  | -0,43 | -2,22 |
| 2,08  | NAN   | 2,61  |
| NAN   | NAN   | NAN   |
| 1,79  | -0,94 | -1,19 |
| 2,02  | 0,68  | NAN   |

|       |       |       |
|-------|-------|-------|
| 3,30  | 0,45  | -1,67 |
| 3,12  | NAN   | -2,25 |
| 2,20  | -0,63 | -2,02 |
| 2,63  | -0,70 | -2,03 |
| 4,07  | -0,23 | -2,38 |
| 2,87  | -1,34 | -2,33 |
| 3,10  | 0,43  | -2,85 |
| 3,92  | -0,81 | 0,57  |
| 1,88  | NAN   | 2,37  |
| 2,39  | -0,50 | -2,07 |
| 2,97  | 1,02  | -2,01 |
| 2,02  | NAN   | -1,74 |
| 2,22  | -0,66 | -1,55 |
| 1,40  | NAN   | 2,68  |
| 2,40  | -0,92 | -1,44 |
| 1,91  | NAN   | 1,82  |
| 2,70  | -0,09 | -0,77 |
| 3,65  | NAN   | 0,37  |
| 1,43  | -0,16 | -2,78 |
| 2,57  | NAN   | -1,15 |
| -0,15 | -0,22 | -0,02 |
| 3,68  | NAN   | 0,09  |
| NAN   | -0,47 | 0,34  |
| 0,91  | NAN   | NAN   |
| 3,89  | -0,49 | -0,71 |
| -0,20 | NAN   | -0,42 |
| 1,78  | NAN   | -0,38 |
| 3,02  | 0,45  | 0,04  |
| 4,08  | 1,54  | 1,04  |
| 1,42  | NAN   | -0,12 |
| 2,60  | 1,72  | 0,63  |
| 3,72  | 0,35  | 0,25  |
| NAN   | NAN   | NAN   |
| 3,25  | -0,81 | 0,02  |
| 3,63  | -0,41 | 0,25  |
| 3,51  | 0,67  | 1,65  |
| 1,48  | 0,13  | 0,85  |
| 2,08  | -0,55 | 1,58  |
| 1,39  | -0,74 | 1,96  |
| 0,37  | 1,42  | 0,90  |
| 2,58  | -0,17 | 0,82  |
| 2,53  | NAN   | -0,18 |
| 1,19  | NAN   | 1,87  |
| -0,46 | -1,31 | 2,25  |
| 1,61  | -0,84 | 0,97  |
| 2,38  | -1,13 | 0,84  |
| 1,73  | -0,27 | 0,40  |
| 0,72  | -0,16 | -0,68 |
| 0,19  | -0,05 | -1,09 |
| 0,57  | 0,68  | -1,55 |

|       |       |       |
|-------|-------|-------|
| 0,92  | -0,49 | -1,36 |
| -0,08 | 0,75  | -0,11 |
| -0,42 | 0,22  | -1,48 |
| -0,74 | 0,88  | -0,73 |
| -0,27 | 0,46  | -1,32 |
| -1,30 | 0,05  | -1,07 |
| 3,81  | -0,02 | 0,93  |
| 3,31  | -1,42 | -0,14 |
| 2,97  | -0,99 | 0,16  |
| -0,22 | -0,89 | 2,13  |
| 1,53  | NAN   | 0,15  |
| 2,82  | -1,57 | 0,09  |
| 1,20  | NAN   | -0,24 |
| 1,77  | -0,95 | -0,63 |
| 1,88  | NAN   | -0,26 |
| 2,46  | -0,51 | 0,06  |
| 1,44  | -1,27 | 0,33  |
| 2,59  | -0,07 | 0,21  |
| 3,19  | 3,71  | 3,56  |
| 2,23  | NAN   | 0,53  |
| 2,57  | 1,45  | 1,18  |
| 2,77  | 4,05  | 3,66  |
| 1,27  | 1,79  | 2,01  |
| 2,81  | 2,68  | 2,62  |
| 2,99  | NAN   | 2,60  |
| 1,93  | 2,44  | 2,21  |
| 3,96  | 5,70  | 5,06  |
| 3,11  | NAN   | 3,35  |
| 3,57  | NAN   | 3,73  |
| 7,08  | 4,43  | 5,34  |
| 6,17  | 3,71  | 4,59  |
| 8,05  | NAN   | 6,17  |
| 3,06  | NAN   | 1,48  |
| 7,24  | 4,99  | 5,23  |
| 2,44  | NAN   | 1,69  |
| 6,36  | NAN   | 3,85  |
| 2,15  | NAN   | 0,01  |
| 2,59  | NAN   | 0,49  |
| 2,02  | NAN   | NAN   |
| NAN   | NAN   | NAN   |
| 1,46  | NAN   | 1,04  |
| 2,50  | NAN   | 0,77  |
| 5,81  | 3,63  | 4,56  |
| 2,47  | NAN   | 1,44  |
| 4,96  | 3,08  | 3,36  |
| 5,93  | 3,76  | 5,11  |
| NAN   | 2,46  | 4,04  |
| 5,53  | 3,01  | 3,97  |
| 4,84  | 2,96  | 3,71  |
| 6,10  | 3,41  | 4,75  |

|      |       |       |
|------|-------|-------|
| 4,61 | 3,21  | 5,39  |
| 6,43 | 4,89  | 6,13  |
| 5,69 | 4,21  | 5,15  |
| 2,66 | 0,55  | 3,48  |
| 2,69 | NAN   | 0,91  |
| 2,52 | NAN   | 2,49  |
| 2,44 | NAN   | 3,14  |
| 2,03 | -1,64 | 2,48  |
| 0,98 | -0,34 | 2,68  |
| 2,47 | NAN   | 0,00  |
| 2,07 | 0,14  | 2,45  |
| 1,74 | 0,09  | 2,15  |
| 2,21 | 0,39  | -0,03 |
| 1,74 | -1,30 | 2,40  |
| 2,08 | -0,30 | 1,56  |
| 3,14 | 0,29  | 1,21  |

| Adiponectin_leptin ratio 12 GW | Adiponectin_leptin ratio 24 GW |
|--------------------------------|--------------------------------|
| 8,21                           | 2,15                           |
| 0,18                           | 0,47                           |
| 1,42                           | 1,19                           |
| 1,31                           | 0,84                           |
| 3,13                           | 2,00                           |
| 11,58                          | 2,36                           |
| 7,55                           | 4,46                           |
| 0,26                           | 0,26                           |
| 1,68                           | 1,22                           |
| 1,05                           | 0,54                           |
| 5,12                           | 1,40                           |
| 1,51                           | 2,27                           |
| 6,30                           | 2,52                           |
| 1,00                           | 1,23                           |
| 7,89                           | 4,94                           |
| 7,26                           | 8,28                           |
| 5,73                           | 1,37                           |
| 2,72                           | 2,10                           |
| 9,29                           | 4,82                           |
| 0,47                           | 0,50                           |
| 9,96                           | 5,85                           |
| 3,27                           | 1,10                           |
| 0,90                           | 0,67                           |
| 4,22                           | 1,24                           |
| 1,06                           | 0,81                           |
| 6,54                           | 2,67                           |
| 3,39                           | 1,16                           |
| 2,90                           | 1,24                           |
| 11,33                          | 3,82                           |
| 4,44                           | 1,87                           |
| 0,62                           | 0,37                           |
| 3,26                           | 1,48                           |
| 7,27                           | 1,28                           |
| 2,18                           | 1,17                           |
| 0,86                           | 0,45                           |
| 6,05                           | 1,08                           |
| 18,83                          | 12,04                          |
| 0,45                           | 0,36                           |
| 0,38                           | 0,28                           |
| 1,24                           | 0,96                           |
| 0,33                           | 0,24                           |
| 1,31                           | 1,65                           |
| 0,93                           | 0,56                           |
| 2,96                           | 2,29                           |
| 5,54                           | 4,16                           |
| 0,95                           | 0,91                           |
| 15,52                          | 2,35                           |



|       |      |
|-------|------|
| 6,07  | 3,99 |
| 3,31  | 2,01 |
| 1,45  | 0,96 |
| 1,00  | 0,60 |
| 0,42  | 4,43 |
| 7,61  | 0,32 |
| 6,21  | 1,35 |
| NAN   | NAN  |
| 3,53  | 2,09 |
| 4,48  | 6,19 |
| 2,81  | 1,21 |
| 8,99  | 5,67 |
| NAN   | 1,24 |
| 2,41  | 2,14 |
| 2,38  | 1,37 |
| NAN   | NAN  |
| 1,04  | 1,40 |
| 4,22  | 3,71 |
| 0,75  | 0,53 |
| 2,66  | 1,12 |
| 1,02  | 0,86 |
| 5,56  | 4,24 |
| 0,88  | 0,39 |
| 11,54 | 4,10 |
| 0,42  | 0,24 |
| 1,35  | 1,19 |
| 1,64  | 0,70 |
| 1,52  | 0,23 |
| 6,32  | 5,10 |
| 2,52  | 0,52 |
| 10,71 | 3,77 |
| 4,46  | 1,30 |
| 1,96  | 0,89 |
| 2,31  | 1,34 |
| 3,78  | 1,28 |
| 5,25  | 1,54 |
| 6,89  | 3,46 |
| 0,80  | 0,49 |
| 1,57  | 1,28 |
| 5,16  | 2,17 |
| 6,06  | 2,72 |
| 2,65  | 1,59 |
| 0,78  | 0,15 |
| 15,85 | 5,10 |
| 11,81 | 4,08 |
| NAN   | NAN  |
| 2,30  | 3,20 |
| 4,77  | 1,61 |
| 1,39  | 0,74 |
| 1,90  | 0,67 |

|       |       |
|-------|-------|
| 5,85  | 12,39 |
| 7,16  | 3,58  |
| 14,43 | 0,09  |
| 6,10  | 1,08  |
| 2,04  | 0,54  |
| 1,82  | 0,56  |
| 3,34  | 2,32  |
| 2,44  | 1,44  |
| 2,26  | 1,34  |
| NAN   | NAN   |
| 3,97  | 2,75  |
| 2,97  | 0,81  |
| 14,30 | 5,90  |
| 10,24 | 6,90  |
| 0,92  | 0,74  |
| 7,22  | 2,83  |
| NAN   | NAN   |
| 5,32  | 0,94  |
| 1,05  | 0,50  |
| 36,98 | 22,05 |
| 2,83  | 1,02  |
| 1,44  | 1,21  |
| 4,65  | 1,54  |
| 3,05  | 0,53  |
| 1,03  | 0,73  |
| 3,17  | 1,64  |
| 11,32 | 4,11  |
| 1,40  | 0,91  |
| 1,08  | 0,48  |
| 8,19  | 5,49  |
| 0,71  | 0,49  |
| 5,88  | 0,35  |
| 2,32  | 1,68  |
| 2,91  | 2,25  |
| 0,84  | 0,31  |
| 3,02  | 1,87  |
| 0,49  | 0,38  |
| 0,81  | 0,59  |
| 1,21  | 1,03  |
| 1,40  | 0,94  |
| 2,04  | 0,97  |
| 0,68  | 0,48  |
| 0,73  | 0,84  |
| 2,40  | 1,08  |
| 2,26  | NAN   |
| 2,93  | 1,07  |
| 4,46  | 1,63  |
| 6,98  | 1,40  |
| 2,52  | 1,15  |
| 1,42  | 0,92  |

[illegible]

[illegible]

[illegible]

[illegible]

## Adiponectin\_leptin ratio 2PD

6,93  
0,82  
1,64  
1,06  
0,93  
2,77  
4,65  
0,21  
1,27  
0,34  
7,42  
0,91  
3,11  
0,65  
10,31  
5,43  
8,98  
2,62  
2,15  
0,35  
5,70  
1,01  
0,81  
6,44  
0,94  
2,35  
1,87  
0,87  
24,22  
2,00  
0,41  
1,35  
1,28  
2,16  
1,21  
3,63  
18,41  
0,40  
0,26  
0,42  
1,04  
1,44  
0,72  
1,89  
4,44  
1,73  
4,78

7,49  
4,61  
2,57  
0,64  
5,88  
0,40  
4,30  
NAN  
2,44  
3,43  
17,00  
2,07  
1,93  
20,12  
2,97  
NAN  
5,12  
7,20  
0,33  
1,70  
0,38  
2,81  
0,42  
4,48  
0,27  
1,09  
8,12  
0,23  
5,29  
1,31  
9,93  
1,75  
1,18  
2,04  
2,19  
1,53  
3,37  
0,92  
2,15  
3,95  
6,23  
2,40  
0,56  
10,57  
7,43  
NAN  
16,35  
8,00  
1,57  
5,20



8,76  
15,80  
0,38  
3,03  
1,96  
3,19  
5,76  
3,09  
2,75  
NAN  
2,93  
0,70  
11,71  
26,89  
1,29  
8,77  
NAN  
15,88  
3,35  
30,72  
1,72  
2,44  
6,30  
6,42  
1,29  
4,08  
21,44  
2,93  
0,35  
15,36  
0,85  
0,45  
2,52  
1,92  
0,50  
3,84  
0,39  
0,56  
1,59  
1,32  
1,50  
0,52  
0,42  
1,49  
NAN  
1,42  
2,51  
3,61  
1,21  
1,12

1,42  
0,56  
5,53  
4,34  
0,98  
9,00  
12,85  
4,33  
1,71  
7,20  
2,72  
3,79  
5,77  
0,88  
2,65  
1,80  
2,34  
1,51  
0,81  
2,48  
7,44  
19,92  
1,25  
4,83  
1,56  
6,46  
22,64  
5,54  
0,77  
3,10  
5,27  
6,19  
4,84  
2,11  
1,70  
3,29  
1,95  
1,03  
1,68  
1,21  
6,79  
0,55  
NAN  
NAN  
NAN  
NAN  
NAN  
NAN  
NAN  
NAN





[illegible]
